# Supplementary material
Source: PubMed Central journal article supplement (PMC4078405)

# Merremoside D: De novo synthesis of the purported structure, NMR analysis, comparison of spectral data

Ehesan U. Sharif,<sup>†</sup> Hua-Yu Leo Wang,<sup>†</sup> Novruz G. Akhmedov\*<sup>§</sup> and George A. O'Doherty\*<sup>†</sup>

<sup>†</sup>Department of Chemistry and Chemical Biology, Northeastern University, Boston, MA 02115

<sup>§</sup>Department of Chemistry, West Virginia University, Morgantown, WV 26506

Corresponding author e-mail: g.odoherty@neu.edu

## Supporting Information

|                                                                                     |    |
|-------------------------------------------------------------------------------------|----|
| Section A: General Information.....                                                 | 2  |
| Section B: Experimental Procedures.....                                             | 3  |
| Section C: <sup>1</sup> H, <sup>13</sup> C NMR Spectra and Correlation Studies..... | 47 |

## Section A: General Information

$^1\text{H}$  and  $^{13}\text{C}$  NMR spectra were recorded on a 400, 500 or 600 MHz spectrometer. Chemical shifts were reported relative to internal tetramethylsilane ( $\delta$  0.00 ppm) or  $\text{CDCl}_3$  ( $\delta$  7.26 ppm) or  $\text{CD}_3\text{OD}$  ( $\delta$  3.30 ppm) or benzene- $d_6$  ( $\delta$  7.16 ppm) or pyridine- $d_5$  ( $\delta$  7.22, 7.58, 8.74 ppm) for  $^1\text{H}$  NMR and  $\text{CDCl}_3$  ( $\delta$  77.23 ppm) or  $\text{CD}_3\text{OD}$  ( $\delta$  49.05 ppm) or benzene- $d_6$  ( $\delta$  128.39 ppm) or pyridine- $d_5$  ( $\delta$  150.35, 135.91, 123.87 ppm) for  $^{13}\text{C}$  NMR. In the case of  $^{19}\text{F}$  NMR, trifluoroacetic acid ( $\delta$  -76.55 ppm) was used as an external reference for Mosher ester analyses. Infrared (IR) spectra were obtained on a FT-IR spectrometer. Optical rotations were measured with a digital polarimeter in the solvent specified. Melting points were determined with a standard melting point apparatus. Flash column chromatography was performed on 60-200 or 230-400 mesh silica gel. Analytical thin-layer chromatography was performed with precoated glassbacked plates and visualized by quenching of fluorescence and by charring after treatment with panisaldehyde or potassium permanganate stain.  $R_f$  values were obtained by elution in the stated solvent ratios. Diethyl ether, tetrahydrofuran, methylene dichloride and triethylamine were dried by passing through activated alumina column with argon gas pressure. Commercial reagents were used without purification unless otherwise noted. Air- and/or moisture-sensitive reactions were carried out under an atmosphere of argon/nitrogen using oven- or flame-dried glassware and standard syringe/septa techniques.

## Section B: Experimental Procedures

### Heptadec-7-yn-6-one **10**<sup>1</sup>

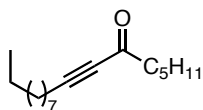

A solution of *n*-BuLi in hexane (30.40 mL, 0.08 mol) was added to a precooled solution of 1-undecyne **11** (11.50 g, 0.08 mol) in dry THF (138 mL) at  $-78\text{ }^{\circ}\text{C}$  under argon. After 30 min at this temperature slowly added hexanal **12** (6.90 g, 0.07 mol) and the resulting mixture was raised to room temperature over a period of 5 h. The reaction mixture was diluted with dichloromethane and quenched with saturated  $\text{NH}_4\text{Cl}$  at  $0\text{ }^{\circ}\text{C}$ . The aqueous phase was extracted with  $\text{CH}_2\text{Cl}_2$  (300 mL x 3). Combined organic layer was dried over  $\text{Na}_2\text{SO}_4$  and concentrated under reduced pressure. Silica gel chromatography with 8-10% ethylacetate/hexane gave the racemic alkynol. The racemic alkynol was then dissolved in 173.00 mL DMSO and added  $\text{Et}_3\text{N}$  (57 mL, 41.90 mol). Cooled the mixture to  $-25\text{ }^{\circ}\text{C}$  and dropwise added a 173 mL DMSO solution of  $\text{Py}\cdot\text{SO}_3$  (33.20 g, 0.21 mol) via cannula. The reaction mixture was slowly raised to room temperature over 3h. Diluted with  $\text{CH}_2\text{Cl}_2$  and quenched with 1N HCl at  $0\text{ }^{\circ}\text{C}$ . The aqueous layer was extracted with  $\text{CH}_2\text{Cl}_2$  and the combined organic layer was washed with saturated  $\text{NaHCO}_3$  and brine. Dried over  $\text{Na}_2\text{SO}_4$  and concentrated under reduced pressure. Silica gel chromatography with 4%  $\text{Et}_2\text{O}$ /hexane gave **10** (13.70g, 78% over 2 steps). Faint yellow oil:  $R_f$  (5% hexanes/ $\text{EtOAc}$ ) = 0.28,  $^1\text{H NMR}$  ( $\text{CDCl}_3$ , 400 MHz):  $\delta$  0.84 (t,  $J = 6.5$  Hz, 3H),  $\delta$  0.86 (t,  $J = 6.5$  Hz, 3H),  $\delta$  1.23-1.38 (m, 18H),  $\delta$  1.53 (tt,  $J = 7.2, 7.2$  Hz, 2H),  $\delta$  1.62 (tt,  $J = 7.2, 7.2$  Hz, 2H),  $\delta$  2.31 (t,  $J = 7.6$  Hz, 2H),  $\delta$  2.47 (t,  $J = 7.2$  Hz, 2H);  $^{13}\text{C NMR}$  ( $\text{CDCl}_3$ , 100 MHz):  $\delta$  188.6, 94.3, 81.0, 45.6, 31.9, 31.3, 29.5, 29.4, 29.2, 28.9, 27.8, 23.9, 22.8, 22.5, 19.0, 14.2, 13.9.

### (*S*)-heptadec-7-yn-6-ol **13**<sup>1</sup>

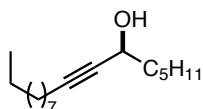

Propargyl ketone **10** (6.61 g, 26.40 mmol) was dissolved in 10 mL  $\text{CH}_2\text{Cl}_2$  and added to a 1:1 mixture of  $\text{HCOOH} : \text{Et}_3\text{N}$  (45 mL). The reaction mixture was then degassed by bubbling argon

<sup>1</sup> Larson, D. P.; Heathcock, C.H. *J. Org. Chem.* **1997**, *62*, 8406.

through the solution for 15 min. Noyori-(*S,S*) catalyst (136.00 mg, 0.224 mmol) was added and the reaction mixture was stirred vigorously at room temperature for 12h. The reaction mixture was diluted with Et<sub>2</sub>O and quenched with saturated NaHCO<sub>3</sub>. The aqueous layer was extracted with Et<sub>2</sub>O (100 mL x 3) and the combined organic layer was washed with saturated brine. Dried over Na<sub>2</sub>SO<sub>4</sub> and concentrated under reduced pressure. Silica gel chromatography with 3% EtOAc/hexane gave propargyl alcohol **13** (6.00 g, 90%). Light yellow oil: *R<sub>f</sub>* (10% hexanes/EtOAc) = 0.54, [ $\alpha$ ]<sub>D</sub><sup>25</sup> = -0.11 (*c* 1.14, CH<sub>2</sub>Cl<sub>2</sub>), <sup>1</sup>H NMR (CDCl<sub>3</sub>, 400 MHz):  $\delta$  0.88 (t, *J* = 7.6 Hz, 3H),  $\delta$  0.96 (t, *J* = 6.4 Hz, 3H),  $\delta$  1.25-1.72 (m, 21H),  $\delta$  1.89 (brs, 1H),  $\delta$  1.18 (ddd, *J* = 1.2, 5.2, 7.2 Hz, 2H),  $\delta$  4.33 (ddd, *J* = 2.0, 2.4, 6.8 Hz, 1H); <sup>13</sup>C NMR (CDCl<sub>3</sub>, 100 MHz):  $\delta$  85.7, 81.6, 62.9, 38.4, 32.1, 31.7, 29.7, 29.4, 29.3, 29.0, 28.9, 25.1, 22.9, 22.8, 18.9, 14.3, 14.2.

**(S)-heptadec-16-yn-6-ol 13a**<sup>1,2</sup>

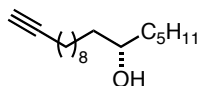

A dry round-bottom flask was charged with KH (7.60 g, 0.19 mol). Hexane was removed by flowing argon through the flask. 1,3-diaminopropane (110 mL, 1.30 mol) was added dropwise and stirred for 90 min to give a homogeneous brown solution. Propargyl alcohol **13** (9.60 g, 0.04 mol) in 54 mL dry THF was added dropwise to the reaction mixture at 0 °C and allowed to warm up to room temperature. After stirring for 2h at room temperature, the reaction mixture was cooled to 0 °C and quenched by adding H<sub>2</sub>O. The aqueous layer was extracted with CH<sub>2</sub>Cl<sub>2</sub> (300 mL x 3) and the combined organic layer was washed with saturated NaHCO<sub>3</sub> and brine. Dried over Na<sub>2</sub>SO<sub>4</sub> and concentrated under reduced pressure. Silica gel chromatography with 5% EtOAc/hexane gave **13a** (6.70 g, 70%). White solid: *R<sub>f</sub>* (5% hexanes/EtOAc) = 0.32, [ $\alpha$ ]<sub>D</sub><sup>25</sup> = +1.1 (*c* 0.14, CH<sub>2</sub>Cl<sub>2</sub>), <sup>1</sup>H NMR (CDCl<sub>3</sub>, 400 MHz):  $\delta$  0.84 (t, *J* = 6.6 Hz, 3H),  $\delta$  1.16-1.50 (m, 23H),  $\delta$  1.78 (brs, 1H),  $\delta$  1.89 (t, *J* = 2.8 Hz, 1H),  $\delta$  2.12 (ddd, *J* = 2.4, 6.8, 7.2 Hz, 2H),  $\delta$  3.52 (m, 1H); <sup>13</sup>C NMR (CDCl<sub>3</sub>, 100 MHz):  $\delta$  84.8, 72.0, 68.2, 37.6, 37.5, 32.1, 29.8, 29.7, 29.6, 29.2, 28.9, 28.6, 25.8, 25.5, 22.8, 18.5, 14.2.

<sup>2</sup> Compound **13a** was involved in the transformation (**13** to **14**), which is not represented in Scheme 2.



**(S)-tert-butyl(heptadec-16-yn-6-yloxy)dimethylsilane 14<sup>1</sup>**

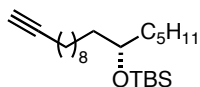

Alcohol **13a** (4.32 g, 17.20 mmol) was dissolved in 34 mL dry CH<sub>3</sub>CN. DMAP (2.09 g, 17.20 mmol) was added to this solution and cooled to 0 °C. At 0 °C under argon, added DBU (7.70 mL, 51.40 mmol) followed by TBSCl (10.30 g, 68.50 mmol). The reaction mixture was raised up to room temperature over 2h. After consumption of starting material, reaction mixture was diluted with Et<sub>2</sub>O and quenched with 1N HCl at 0 °C. The aqueous layer was extracted with Et<sub>2</sub>O (200mL x 3) and the combined organic layer was washed with saturated NaHCO<sub>3</sub> and brine. Dried over Na<sub>2</sub>SO<sub>4</sub> and concentrated under reduced pressure. Silica gel chromatography with 2-5% Et<sub>2</sub>O/hexane gave **14** (6.30 g, quantitative). Colorless oil: *R<sub>f</sub>* (1% hexanes/EtOAc) = 0.72,  $[\alpha]_D^{25} = -0.04$  (*c* 5.0, CH<sub>2</sub>Cl<sub>2</sub>), <sup>1</sup>H NMR (CDCl<sub>3</sub>, 400 MHz): δ 0.03 (s, 6H), δ 0.86 (t, *J* = 6.4 Hz, 3H), δ 0.88 (s, 12H), δ 1.28-1.56 (m, 23H), δ 1.89 (t, *J* = 3.2 Hz, 1H), δ 2.16 (ddd, *J* = 2.8, 4.4, 6.8 Hz, 2H), δ 3.61 (m, 1H); <sup>13</sup>C NMR (CDCl<sub>3</sub>, 100 MHz): δ 84.7, 72.5, 68.3, 37.4, 32.4, 30.1, 29.8, 29.7, 29.4, 29.0, 28.7, 26.1, 25.5, 25.2, 22.9, 18.6, 14.3, -4.2.

**(S)-methyl 11-hydroxyhexadecanoate 7<sup>1</sup>**

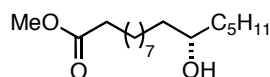

Alkyne **14** (7.23 g, 19.70 mmol) was dissolved in 65 mL benzene and 20 mL HOAc. The resulting solution was cooled to 0 °C and added an aqueous solution of KMnO<sub>4</sub> (12.50 g, 0.08 mmol in 100 mL H<sub>2</sub>O) dropwise via a dropping funnel. To this reaction mixture, added CTAB (1.44 g, 4.00 mmol) and stirred vigorously without replenishing ice over a period of 24h. Upon consumption of starting material, cooled the reaction to 0 °C and slowly added 20 g Na<sub>2</sub>SO<sub>3</sub> followed by 26 mL 1N HCl. Stirred for approximately 10 min until white precipitate formed and reaction turned colorless. The precipitate was dissolved by adding H<sub>2</sub>O and the aqueous layer was subsequently extracted with CH<sub>2</sub>Cl<sub>2</sub> (300 mL x 3). The combined organic layer was dried over Na<sub>2</sub>SO<sub>4</sub> and concentrated under reduced pressure. The crude reaction mixture was passed through a pad of celite to obtain the corresponding carboxylic acid, which was carried to the next step without further purification. The crude carboxylic acid was dissolved in 300 mL MeOH and added 9.00 mL conc. H<sub>2</sub>SO<sub>4</sub>. The resulting reaction mixture was refluxed at 65 °C for 2h. The

reaction was then cooled 0 °C and added 10 g solid NaHCO<sub>3</sub>. MeOH was removed under reduced pressure and the resulting ester was partitioned between EtOAc and H<sub>2</sub>O. The aqueous layer was extracted with EtOAc (300 mL x 3) and the combined organic layer was washed with saturated brine. Dried over Na<sub>2</sub>SO<sub>4</sub> and concentrated under reduced pressure. Silica gel chromatography with 5-10% EtOAc/hexane gave jalapinic ester **7** (3.36, 61%, 2 steps). White solid: mp: 38-40 °C, *R<sub>f</sub>* (10% hexanes/EtOAc) = 0.45,  $[\alpha]_D^{25} = +1.0$  (*c* 1.07, CHCl<sub>3</sub>), (ref<sup>1</sup>:  $[\alpha]_D = +0.9$  (CHCl<sub>3</sub>)), <sup>1</sup>H NMR (CDCl<sub>3</sub>, 400 MHz): δ 0.88 (t, *J* = 6.8 Hz, 3H), δ 1.20-1.45 (m, 22H), δ 1.60 (m, 2H), δ 2.29 (t, *J* = 7.6 Hz, 2H), δ 3.57 (m, 1H), 3.65 (s, 3H); <sup>13</sup>C NMR (CDCl<sub>3</sub>, 100 MHz): δ 174.3, 72.0, 51.4, 37.5, 37.4, 34.1, 31.9, 29.6, 29.5, 29.3, 29.2, 29.1, 25.6, 25.3, 24.9, 22.6, 14.0. The enantiomeric excess (ee) was determined by Mosher ester analysis.

### 1-(Methoxycarbonyl)pentadec-10(*S*)-yl 2,3-didehydro-5-methyl-4-oxo-pyran **15**

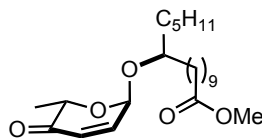

Jalapinic ester **7** (236 mg, 0.82 mmol) was dissolved in 2.70 mL dry CH<sub>2</sub>Cl<sub>2</sub>. To this added α-L-Boc-pyranone **5** (282 mg, 1.24 mmol). The reaction mixture was cooled to 0 °C and added a premixed solution of Pd<sub>2</sub>(dba)<sub>3</sub>•CHCl<sub>3</sub> (21.30 mg, 0.02 mmol) and PPh<sub>3</sub> (21.60 mg, 0.08 mmol) dissolved in CH<sub>2</sub>Cl<sub>2</sub> via cannula under argon. The reaction mixture was stirred under argon at 0 °C overnight. After consumption of starting materials, concentrated the reaction mixture under reduced pressure and flash chromatography with 12-14% Et<sub>2</sub>O/hexane yielded the desired product **15** (318 mg, 97%). Colorless oil: *R<sub>f</sub>* (10% hexanes/EtOAc) = 0.62;  $[\alpha]_D^{25} = +13.8$  (*c* 0.98, CH<sub>2</sub>Cl<sub>2</sub>); IR (thin film, cm<sup>-1</sup>) ν 2928, 2855, 1739, 1700, 1158, 1079, 1025; <sup>1</sup>H NMR (CDCl<sub>3</sub>, 400 MHz): δ 0.85 (t, *J* = 7.2 Hz, 3H), δ 1.17-1.29 (m, 18H), δ 1.32 (d, *J* = 6.8 Hz, 3H), δ 1.44-1.58 (m, 6H), δ 2.25 (t, *J* = 7.2 Hz, 2H), δ 3.64 (s, 3H), δ 3.68 (m, 1H), δ 4.56 (q, *J* = 6.4 Hz, 1H), δ 5.21 (d, *J* = 3.6 Hz, 1H), δ 6.02 (d, *J* = 10.4 Hz, 1H), δ 6.76 (dd, *J* = 3.2, 10.4 Hz, 1H); <sup>13</sup>C NMR (CDCl<sub>3</sub>, 100 MHz): δ 196.4, 174.6, 142.9, 128.1, 89.8, 72.2, 71.1, 51.7, 37.7, 37.6, 34.3, 32.1, 30.0, 29.9, 29.6, 29.4, 29.3, 25.8, 25.5, 25.1, 22.9, 15.6, 14.3; HRMS (ESI): calcd for [C<sub>23</sub>H<sub>40</sub>O<sub>5</sub> + Na]<sup>+</sup> 419.2773, found 419.2768.

### 1-(Methoxycarbonyl)pentadec-10(S)-yl 2,3-didehydro- $\alpha$ -L-rhamnopyranoside **16**

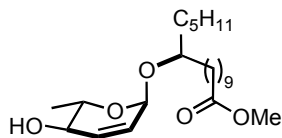

Enone **15** (258 mg, 0.65 mmol) was dissolved in 1.30 mL dry  $\text{CH}_2\text{Cl}_2$  and cooled to  $-78\text{ }^\circ\text{C}$ . To this cooled solution, added a 0.4 M solution of  $\text{CeCl}_3 \cdot \text{MeOH}$  (1.30 mL). After stirring for 10 min at this temperature, added solid  $\text{NaBH}_4$  (37 mg, 0.98 mmol) in portions. The reaction mixture was stirred at  $-78\text{ }^\circ\text{C}$  for 2h. Quenched with saturated  $\text{NaHCO}_3$  at low temperature, diluted with  $\text{CH}_2\text{Cl}_2$  and warmed to  $0\text{ }^\circ\text{C}$ . The aqueous layer was extracted with  $\text{CH}_2\text{Cl}_2$  (50mL x 3) and the combined organic layer was washed with saturated brine. Dried over  $\text{Na}_2\text{SO}_4$  and concentrated under reduced pressure. Silica gel chromatography with 15-20% EtOAc/hexane gave enol **16** (255 mg, 98%). Colorless oil:  $R_f$  (10% hexanes/EtOAc) = 0.20;  $[\alpha]_D^{25} = -29.5$  ( $c$  1.08,  $\text{CH}_2\text{Cl}_2$ ); IR (thin film,  $\text{cm}^{-1}$ )  $\nu$  3460, 29.27, 28.55, 17.41, 1635, 1457, 1034, 668, 526;  $^1\text{H}$  NMR ( $\text{CDCl}_3$ , 400 MHz):  $\delta$  0.86 (t,  $J = 7.2$  Hz, 3H),  $\delta$  1.18-1.30 (m, 21H),  $\delta$  1.34-1.48 (m, 4H),  $\delta$  1.61 (m, 2H),  $\delta$  2.27 (t,  $J = 8.0$  Hz, 2H),  $\delta$  3.60 (m, 1H),  $\delta$  3.63 (s, 3H),  $\delta$  3.69 (dq,  $J = 2.4, 6.6$  Hz, 1H),  $\delta$  3.77 (dd,  $J = 1.6, 7.2$  Hz, 1H),  $\delta$  4.95 (s, 1H),  $\delta$  5.67 (ddd,  $J = 2.4, 5.2, 10.4$  Hz, 1H),  $\delta$  5.89 (d,  $J = 10.0$  Hz, 1H);  $^{13}\text{C}$  NMR ( $\text{CDCl}_3$ , 100 MHz):  $\delta$  174.5, 133.6, 127.0, 93.5, 78.8, 69.4, 68.2, 51.6, 35.3, 34.6, 34.2, 29.9, 29.7, 29.5, 29.4, 29.3, 25.5, 25.4, 25.1, 22.8, 18.0, 14.2; HRMS (ESI): calcd for  $[\text{C}_{23}\text{H}_{42}\text{O}_5 + \text{Na}]^+$  421.2924, found 421.2923.

### 1-(Methoxycarbonyl)pentadec-10(S)-yl $\alpha$ -L-rhamnopyranoside **17**

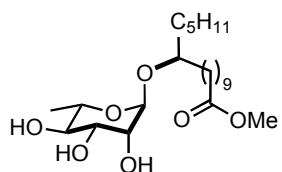

Allylic alcohol **16** (234 mg, 0.59 mmol) was dissolved in a 1:1 mixture of *t*-BuOH/acetone (0.60 mL) and the mixture was cooled to  $0\text{ }^\circ\text{C}$ . To this added a 50% (v/v) solution of NMO/ $\text{H}_2\text{O}$  (0.60 mL). The reaction mixture was stirred at that temperature for 15 min and added  $\text{OsO}_4$  (7.5 mg, 0.03 mmol). The resulting reaction mixture was stirred over night without replenishing ice from

0 °C to rt. After consumption of starting material, the reaction was cooled back to 0 °C, diluted with EtOAc and reduced the excess OsO<sub>4</sub> with saturated Na<sub>2</sub>SO<sub>3</sub>. The reaction mixture was then concentrated to remove acetone. The aqueous layer was extracted with EtOAc (30mL x 3) and the combined organic layer was washed with saturated brine. Dried over Na<sub>2</sub>SO<sub>4</sub> and concentrated under reduced pressure. Silica gel chromatography with 65-70% EtOAc/hexane gave triol **17** (212 mg, 83%). White solid: *R<sub>f</sub>* (70% hexanes/EtOAc) = 0.21; mp: 56 °C; [ $\alpha$ ]<sub>D</sub><sup>25</sup> = -41.5 (*c* 0.66, CH<sub>2</sub>Cl<sub>2</sub>); IR (thin film, cm<sup>-1</sup>)  $\nu$  3391, 2926, 2854, 1741, 1456, 1048, 668; <sup>1</sup>H NMR (CDCl<sub>3</sub>, 400 MHz):  $\delta$  0.86 (t, *J* = 7.2 Hz, 3H),  $\delta$  1.18-1.28 (m, 21H),  $\delta$  1.45 (m, 4H),  $\delta$  1.60 (m, 2H),  $\delta$  2.29 (t, *J* = 7.2 Hz, 2H),  $\delta$  2.49 (brs, 1H),  $\delta$  3.47 (m, 1H),  $\delta$  3.57 (m, 1H),  $\delta$  3.65 (s, 3H),  $\delta$  3.69-3.89 (m, 3H),  $\delta$  4.21 (brs, 1H),  $\delta$  4.82 (s, 1H); <sup>13</sup>C NMR (CDCl<sub>3</sub>, 100 MHz):  $\delta$  174.7, 98.7, 78.1, 73.3, 72.2, 71.9, 68.4, 51.7, 34.6, 34.3, 44.3, 32.1, 30.0, 29.7, 29.5, 29.4, 29.3, 25.3, 25.1, 25.0, 22.8, 17.6, 14.3; HRMS (ESI): calcd for [C<sub>23</sub>H<sub>44</sub>O<sub>7</sub> + Na]<sup>+</sup> 455.2984, found 455.2979.

### 1-(Methoxycarbonyl)pentadec-10(*S*)-yl 2,3-*O*-isopropylidene- $\alpha$ -L-rhamnopyranoside **18**

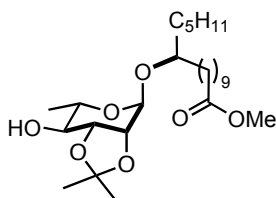

Triol **17** (175 mg, 0.40 mmol) was dissolved in dry acetone (1.30 mL) and the mixture was cooled to 0 °C. To this added 2,2-DMP (98  $\mu$ L, 0.80 mmol) and *p*-TsOH (0.76 mg, 0.004 mmol). The reaction was stirred under argon from 0 °C to rt over 2h. Then the reaction was quenched by adding few drops of Et<sub>3</sub>N at 0 °C. The quenched reaction mixture was concentrated under reduced pressure and purified by silica gel chromatography. Elution with 20-25% EtOAc/hexane gave **18** (170 mg, 90%). Colorless oil: *R<sub>f</sub>* (20% hexanes/EtOAc) = 0.34; [ $\alpha$ ]<sub>D</sub><sup>25</sup> = -23.38 (*c* 1.65, CH<sub>2</sub>Cl<sub>2</sub>); IR (thin film, cm<sup>-1</sup>)  $\nu$  3459, 2928, 2855, 1741, 1457, 1380, 1219, 1071, 1051, 996, 861; <sup>1</sup>H NMR (CDCl<sub>3</sub>, 400 MHz):  $\delta$  0.87 (t, *J* = 7.4 Hz, 3H),  $\delta$  1.12-1.30 (m, 21H),  $\delta$  1.35 (s, 3H),  $\delta$  1.46 (m, 4H), 1.52 (s, 3H),  $\delta$  1.62 (m, 2H),  $\delta$  2.29 (t, *J* = 7.2 Hz, 2H),  $\delta$  2.64 (d, *J* = 3.6 Hz, 1H),  $\delta$  3.38 (m, 1H),  $\delta$  3.62 (m, 1H),  $\delta$  3.64 (s, 3H),  $\delta$  3.74 (dq, *J* = 6.0, 7.8 Hz, 1H),  $\delta$  3.09 (dd, *J* = 8.8, 7.8 Hz, 1H),  $\delta$  4.09 (d, *J* = 3.2 Hz, 1H),  $\delta$  5.02 (s, 1H); <sup>13</sup>C NMR (CDCl<sub>3</sub>, 100 MHz):  $\delta$  174.6, 109.5, 95.7, 78.6, 76.6, 74.6, 66.2, 51.7, 34.6, 34.3, 33.1, 32.1, 30.0, 29.9, 29.7, 29.6,

29.4, 29.3, 28.2, 26.4, 25.4, 25.1, 25.0, 22.8, 17.5, 14.3; HRMS (ESI): calcd for  $[C_{26}H_{48}O_7 + Na]^+$  495.3292, found 495.3290.

**1-(Methoxycarbonyl)pentadec-10(S)-yl 2,3-didehydro-5-methyl-4-oxo-pyranosyl-(1→4)-2,3-O-isopropylidene- $\alpha$ -L-rhamnopyranoside **18a**<sup>3</sup>**

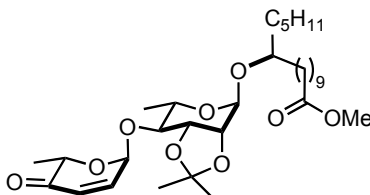

Glycosyl acceptor **18** (2.11 g, 4.47 mmol) was dissolved in 15 mL dry CH<sub>2</sub>Cl<sub>2</sub>. To this added  $\alpha$ -L-Boc-pyranone **5** (2.04 g, 8.95 mmol). The reaction mixture was cooled to 0 °C and added a premixed solution of Pd<sub>2</sub>(dba)<sub>3</sub>•CHCl<sub>3</sub> (115.70 mg, 0.11 mmol) and PPh<sub>3</sub> (117.20 mg, 0.45 mmol) in CH<sub>2</sub>Cl<sub>2</sub> via cannula under argon. The reaction mixture was stirred under argon at 0 °C overnight. Concentrated the reaction mixture under reduced pressure and flash chromatography with 10% EtOAc/hexane yielded the desired product **18a** (2.60 g, quantitative). Colorless oil: *R<sub>f</sub>* (20% hexanes/EtOAc) = 0.35;  $[\alpha]_D^{25} = -13.52$  (*c* 1.07, CH<sub>2</sub>Cl<sub>2</sub>); IR (thin film, cm<sup>-1</sup>)  $\nu$  2928, 2855, 1734, 1700, 1669, 1576, 1540, 1457, 1045, 1020, 668; <sup>1</sup>H NMR (CDCl<sub>3</sub>, 400 MHz):  $\delta$  0.86 (t, *J* = 6.8 Hz, 3H),  $\delta$  1.19-1.32 (m, 22H),  $\delta$  1.35 (s, 3H),  $\delta$  1.37-1.51 (m, 6H), 1.56 (s, 3H),  $\delta$  1.59 (m, 2H),  $\delta$  2.87 (t, *J* = 7.6 Hz, 2H),  $\delta$  3.58-3.67 (m, 5H),  $\delta$  3.75 (m, 1H),  $\delta$  4.09 (d, *J* = 5.2 Hz, 1H),  $\delta$  4.21 (dq, *J* = 6.0, 8.2 Hz, 1H),  $\delta$  4.54 (q, *J* = 6.8, 1H),  $\delta$  5.05 (s, 1H),  $\delta$  5.77 (d, *J* = 3.6 Hz, 1H),  $\delta$  6.08 (d, *J* = 10.4 Hz, 1H),  $\delta$  6.87 (dd, *J* = 3.6, 10.0 Hz, 1H); <sup>13</sup>C NMR (CDCl<sub>3</sub>, 100 MHz):  $\delta$  197.2, 174.5, 143.8, 127.2, 109.5, 95.5, 92.5, 79.1, 79.0, 76.9, 70.6, 64.4, 51.6, 34.6, 34.3, 33.2, 32.1, 29.9, 29.8, 29.7, 29.6, 29.4, 29.3, 28.2, 26.6, 25.4, 25.1, 25.0, 22.8, 17.7, 15.3, 14.3 ; HRMS (ESI): calcd for  $[C_{32}H_{54}O_9 + Na]^+$  605.3660, found 605.3659.

<sup>3</sup> Compound **18a** was involved in the transformation (**18** to **19**), which is not represented in Scheme 3.

**1-(Methoxycarbonyl)pentadec-10(S)-yl 2,3-didehydro- $\alpha$ -L-rhamnopyranosyl -(1 $\rightarrow$ 4)-2,3-O-isopropylidene- $\alpha$ -L-rhamnopyranoside **19****

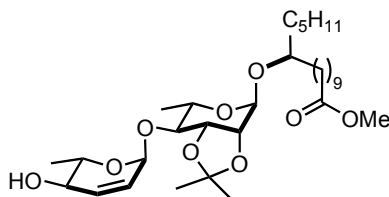

Enone **18a** (158 mg, 0.27 mmol) was dissolved in 0.50 mL dry  $\text{CH}_2\text{Cl}_2$  and cooled to  $-78\text{ }^\circ\text{C}$ . To this added a 0.40 M solution of  $\text{CeCl}_3 \cdot \text{MeOH}$  (0.50 mL). After stirring for 10 min at this temperature, added solid  $\text{NaBH}_4$  (15.40 mg, 0.41 mmol) in portions. The reaction mixture was stirred at to  $-78\text{ }^\circ\text{C}$  for 2h. Quenched with saturated  $\text{NaHCO}_3$  at low temperature, diluted with  $\text{CH}_2\text{Cl}_2$  and warmed to  $0\text{ }^\circ\text{C}$ . The aqueous layer was extracted with  $\text{CH}_2\text{Cl}_2$  (20mL x 3) and the combined organic layer was washed with saturated brine. Dried over  $\text{Na}_2\text{SO}_4$  and concentrated under reduced pressure. Silica gel chromatography with 20% EtOAc/hexane gave enol **19** (140 mg, 89%). Colorless oil:  $R_f$  (10% hexanes/EtOAc) = 0.21;  $[\alpha]_D^{25} = -44.81$  ( $c$  1.69,  $\text{CH}_2\text{Cl}_2$ ); IR (thin film,  $\text{cm}^{-1}$ )  $\nu$  3479, 2931, 2856, 1741, 1381, 1133, 1050, 1022, 987, 862;  $^1\text{H}$  NMR ( $\text{CDCl}_3$ , 400 MHz):  $\delta$  0.86 (t,  $J = 7.6$  Hz, 3H),  $\delta$  1.16-1.29 (m, 22H),  $\delta$  1.33 (s, 3H),  $\delta$  1.42-1.49 (m, 6H), 1.52 (s, 3H),  $\delta$  1.59 (m, 2H),  $\delta$  1.91 (d,  $J = 8.0$  Hz, 1H),  $\delta$  2.28 (t,  $J = 7.6$  Hz, 2H),  $\delta$  3.56-3.75 (m, 7H),  $\delta$  3.82 (dd,  $J = 8.0, 8.0$  Hz, 1H),  $\delta$  4.05 (d,  $J = 6.2$  Hz, 1H),  $\delta$  4.17 (dd,  $J = 1.6, 6.2$  Hz, 1H),  $\delta$  5.03 (s, 1H),  $\delta$  5.44 (s, 1H),  $\delta$  5.77 (ddd,  $J = 2.4, 4.4, 10.0$  Hz, 1H),  $\delta$  5.92 (d,  $J = 10.4$  Hz, 1H);  $^{13}\text{C}$  NMR ( $\text{CDCl}_3$ , 100 MHz):  $\delta$  174.6, 133.7, 126.8, 109.3, 95.5, 93.8, 79.2, 78.4, 77.3, 76.9, 69.6, 68.2, 64.5, 51.6, 34.6, 43.3, 33.1, 32.1, 29.9, 29.7, 29.5, 29.4, 29.3 28.2, 26.7, 25.4, 25.1, 25.0, 22.8, 17.9, 17.5, 14.3; HRMS (ESI): calcd for  $[\text{C}_{32}\text{H}_{56}\text{O}_9 + \text{Na}]^+$  607.3816, found 607.3814.

**1-(Methoxycarbonyl)pentadec-10(S)-yl 2,3-didehydro-4-O-benzyl- $\alpha$ -L-rhamnopyranosyl - (1 $\rightarrow$ 4)-2,3-O-isopropylidene- $\alpha$ -L-rhamnopyranoside **19a**<sup>4</sup>**

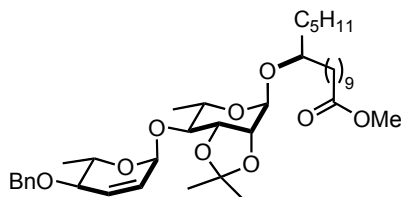

Allylic alcohol **19** (53.90 mg, 0.09 mmol) was dissolved in 0.50 mL dry DMF and cooled to 0 °C. To this added BnBr (22.00  $\mu$ L, 0.184 mmol) followed NaH (3.30 mg, 0.14 mmol). Ice bath was removed after addition of NaH and the reaction was stirred at rt for 2h. Upon consumption of starting material, the reaction was diluted with Et<sub>2</sub>O and quenched with saturated NaHCO<sub>3</sub> at 0 °C. The aqueous layer was extracted with Et<sub>2</sub>O (20mL x 3) and the combined organic layer was washed with saturated brine. Dried over Na<sub>2</sub>SO<sub>4</sub> and concentrated under reduced pressure. Silica gel chromatography with 7-8 % EtOAc/hexane gave benzyl ether **19a** (58.3 mg, 96%). Faint yellowish oil:  $R_f$  (20% hexanes/EtOAc) = 0.50;  $[\alpha]_D^{25} = -1.50$  ( $c$  0.10, CH<sub>2</sub>Cl<sub>2</sub>); IR (thin film, cm<sup>-1</sup>)  $\nu$  2934, 2860, 1741, 1478, 1397, 1381, 1130, 1049, 981, 866; <sup>1</sup>H NMR (CDCl<sub>3</sub>, 400 MHz):  $\delta$  0.88 (t,  $J = 7.6$  Hz, 3H),  $\delta$  1.24-1.28 (m, 22H),  $\delta$  1.35 (s, 3H),  $\delta$  1.44-1.47 (m, 6H), 1.54 (s, 3H),  $\delta$  1.61 (m, 2H),  $\delta$  2.30 (t,  $J = 8.0$  Hz, 2H),  $\delta$  3.58-3.77 (m, 8H),  $\delta$  4.04 (d,  $J = 5.2$  Hz, 1H),  $\delta$  4.20 (dd,  $J = 1.2, 7.2$  Hz, 1H),  $\delta$  4.67 (d,  $J = 11.6$  Hz, 1H), 4.55 (d,  $J = 11.6$  Hz, 1H),  $\delta$  5.04 (s, 1H),  $\delta$  5.46 (s, 1H),  $\delta$  5.81 (ddd,  $J = 2.4, 4.4, 10.8$  Hz, 1H),  $\delta$  6.09 (d,  $J = 10.4$  Hz, 1H),  $\delta$  7.28-7.34 (m, 5H); <sup>13</sup>C NMR (CDCl<sub>3</sub>, 100 MHz):  $\delta$  174.5, 138.2, 130.9, 128.6, 128.1, 128.0, 126.9, 109.3, 95.4, 93.9, 79.3, 78.2, 77.0, 76.4, 71.2, 66.1, 64.6, 51.7, 43.6, 34.3, 33.2, 32.1, 30.0, 29.7, 29.6, 29.4, 29.3, 28.2, 26.7, 25.4, 25.1, 25.0, 22.8, 18.2, 17.5, 14.3; HRMS (ESI): calcd for [C<sub>39</sub>H<sub>62</sub>O<sub>9</sub> + Na]<sup>+</sup> 697.4292, found 697.4292.

<sup>4</sup> Compound **19a** was involved in the transformation (**19** to **8**), which is not represented in Scheme 3.

**1-(Methoxycarbonyl)pentadec-10(S)-yl 4-O-benzyl- $\alpha$ -L-rhamnopyranosyl -(1 $\rightarrow$ 4)-2,3-O-isopropylidene- $\alpha$ -L-rhamnopyranoside **19b**<sup>5</sup>**

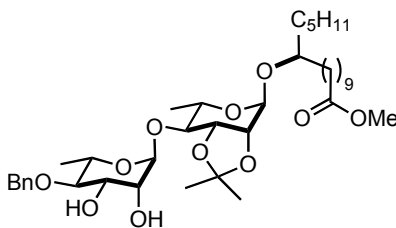

Alkene **19a** (125.50 mg, 0.19 mmol) was dissolved in a 1:1 mixture of *t*-BuOH/acetone (0.50 mL) and the mixture was cooled to 0 °C. To this added a 50% (v/v) solution of NMO/H<sub>2</sub>O (0.50 mL). The reaction mixture was stirred at that temperature for 15 min and added OsO<sub>4</sub> (2.40 mg, 0.01 mmol). The reaction mixture was stirred overnight without replenishing ice from 0 °C to rt. After consumption of starting material, cooled the reaction to 0 °C, diluted with EtOAc and reduced the excess OsO<sub>4</sub> with saturated Na<sub>2</sub>SO<sub>3</sub>. The reaction mixture was then concentrated to remove acetone. The aqueous layer was extracted with EtOAc (20mL x 3) and the combined organic layer was washed with saturated brine. Dried over Na<sub>2</sub>SO<sub>4</sub> and concentrated under reduced pressure. Silica gel chromatography with 27-30 % EtOAc/hexane gave diol **19b** (115 mg, 87%). Colorless oil: *R<sub>f</sub>* (30% hexanes/EtOAc) = 0.23; [ $\alpha$ ]<sub>D</sub><sup>25</sup> = -76.50 (*c* 0.40, CH<sub>2</sub>Cl<sub>2</sub>); IR (thin film, cm<sup>-1</sup>)  $\nu$  3391, 2920, 2854, 1741, 1478, 1387, 1393, 1130, 1047, 986, 866; <sup>1</sup>H NMR (CDCl<sub>3</sub>, 400 MHz):  $\delta$  0.88 (t, *J* = 7.2 Hz, 3H),  $\delta$  1.22-1.33 (m, 22H),  $\delta$  1.34 (s, 3H),  $\delta$  1.46 (m, 6H), 1.53 (s, 3H), ),  $\delta$  1.60 (m, 2H),  $\delta$  1.75 (brs, 1H),  $\delta$  2.29 (t, *J* = 8.0 Hz, 2H),  $\delta$  2.43 (d, *J* = 5.2 Hz, 1H),  $\delta$  2.55 (brs, 1H),  $\delta$  3.36 (dd, *J* = 8.8, 9.2 Hz, 1H),  $\delta$  3.50 (dd, *J* = 2.0, 9.6 Hz, 1H),  $\delta$  3.62 (m, 1H),  $\delta$  3.66 (s, 3H),  $\delta$  3.67-3.75 (m, 1H),  $\delta$  3.84 (dq, *J* = 6.0, 8.2 Hz, 1H),  $\delta$  3.96 (brs, 1H),  $\delta$  4.05 (d, *J* = 3.2, 1H),  $\delta$  4.15 (dd, *J* = 3.0, 7.6 Hz, 1H),  $\delta$  4.74 (s, 2H),  $\delta$  5.03 (s, 1H),  $\delta$  5.10 (s, CH<sub>2</sub>Cl<sub>2</sub>),  $\delta$  5.35 (s, 1H),  $\delta$  7.29-7.36 (m, 5H); <sup>13</sup>C NMR (CDCl<sub>3</sub>, 100 MHz):  $\delta$  174.6, 138.4, 128.8, 128.4, 128.3, 128.2, 109.5, 98.4, 95.6, 81.7, 78.8, 75.3, 71.6, 71.5, 67.9, 64.3, 51.7, 34.6, 34.3, 33.2, 32.1, 30.0, 29.7, 29.6, 29.4, 29.3, 28.1, 26.7, 25.4, 25.1, 22.8, 18.1, 18.0, 14.3; HRMS (ESI): calcd for [C<sub>39</sub>H<sub>64</sub>O<sub>11</sub> + Na]<sup>+</sup> 731.4312, found 731.4324.

<sup>5</sup> Compound **19b** was involved in the transformation (**19** to **8**), which is not represented in Scheme 3.



**1-(Hydroxycarbonyl)pentadec-10(S)-yl 4-O-benzyl- $\alpha$ -L-rhamnopyranosyl -(1 $\rightarrow$ 4)-2,3-O-isopropylidene- $\alpha$ -L-rhamnopyranoside **8**<sup>6</sup>**

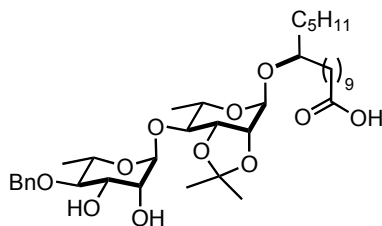

Methyl ester **19b** (114.90 mg, 0.16 mmol) was dissolved in a 9:1 mixture of MeOH/H<sub>2</sub>O (1.60 mL). To the resulting mixture, added KOH (90.90 mg, 1.62 mmol) and refluxed at 55 °C for 3h. Cooled the reaction mixture to 0 °C, diluted with CH<sub>2</sub>Cl<sub>2</sub> and quenched with 1N HCl. The aqueous layer was extracted with CH<sub>2</sub>Cl<sub>2</sub> (30mL x 3) and the combined organic layer was dried over Na<sub>2</sub>SO<sub>4</sub> and concentrated under reduced pressure. Silica gel chromatography with 30-35 % acetone/hexane gave diol-acid **8** (109 mg, 97%). Colorless oil: *R<sub>f</sub>* (30% acetone/hexane) = 0.35; IR (thin film, cm<sup>-1</sup>)  $\nu$  3469, 2986, 2864, 1741, 1715, 1470, 1383, 1038, 981, 862; <sup>1</sup>H NMR (CDCl<sub>3</sub>, 400 MHz):  $\delta$  0.88 (t, *J* = 7.2 Hz, 3H),  $\delta$  1.21-1.32 (m, 22H),  $\delta$  1.33 (s, 3H),  $\delta$  1.46 (m, 6H),  $\delta$  1.53 (s, 3H),  $\delta$  1.61 (m, 2H),  $\delta$  2.32 (t, *J* = 7.2 Hz, 2H),  $\delta$  3.38 (dd, *J* = 9.2, 9.6 Hz, 1H),  $\delta$  3.50 (dd, *J* = 7.3, 10.0 Hz, 1H),  $\delta$  3.62 (m, 1H),  $\delta$  3.66-3.77 (m, 2H),  $\delta$  3.86 (dd, *J* = 2.8, 8.8 Hz, 1H),  $\delta$  3.96 (d, *J* = 2.8 Hz, 1H),  $\delta$  4.06 (d, *J* = 4.8 Hz, 1H),  $\delta$  4.16 (dd, *J* = 4.8, 7.6 Hz, 1H),  $\delta$  4.77 (d, *J* = 11.6 Hz, 1H), 4.73 (d, *J* = 11.6 Hz, 1H),  $\delta$  5.04 (s, 1H),  $\delta$  5.36 (s, 1H),  $\delta$  7.28-7.34 (m, 5H); <sup>13</sup>C NMR (CDCl<sub>3</sub>, 100 MHz):  $\delta$  179.2, 138.3, 128.7, 128.2, 128.1, 109.5, 98.4, 95.6, 81.6, 78.8, 77.6, 77.5, 76.9, 75.3, 71.6, 68.0, 64.3, 34.6, 34.1, 33.1, 32.0, 29.9, 29.6, 29.5, 29.3, 29.2, 28.0, 26.6, 25.3, 25.0, 24.8, 22.7, 18.0, 17.9, 14.2.

<sup>6</sup> Zhu, X. M.; He, L. L.; Yang, G. L.; Lei, M.; Chen, S. S.; Yang, J. S. *Synlett*. **2006**, *20*, 3510.

## Macrolactones **20** and **21**<sup>6</sup>

Diol acid **8** (150 mg, 0.22 mmol) was dissolved in dry/degassed toluene (5.40 mL). To the resulting mixture was added  $\text{Py}_2\text{S}_2$  (228 mg, 1.13 mmol) and  $\text{PPh}_3$  (295.60 mg, 1.13 mmol). The reaction was stirred at rt under argon for 5h. Upon consumption of starting material, it was diluted to 20 mL with dry/degassed toluene and loaded into a syringe. Using a syringe-pump, the mixture is added to boiling dry/degassed toluene (230 mL) over a period of 4 days. The reaction was then concentrated under reduced pressure and loaded directly on a column. Gradient elution with 12-13% EtOAc/hexane gave C-2-macrolactone **20** (80.9 mg, 54.3%) and elution with 14-15% EtOAc/hexane C-3-macrolactone **21** (17.2 mg, 11.5%).

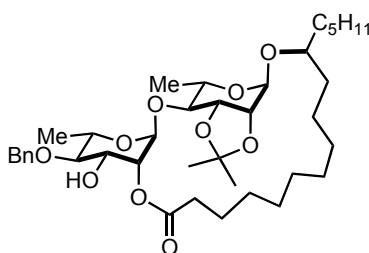

**20**:<sup>7</sup> Colorless oil;  $R_f$  (30% EtOAc/hexane) = 0.32;  $[\alpha]_D^{25} = -24.6$  ( $c$  0.5,  $\text{CHCl}_3$ ); IR (thin film,  $\text{cm}^{-1}$ )  $\nu$  3448, 2980, 2876, 1741, 1710, 1490, 1036, 980, 861;  $^1\text{H}$  NMR ( $\text{CDCl}_3$ , 600 MHz):  $\delta$  0.88 (t,  $J = 7.2$  Hz, 3H),  $\delta$  1.23 (d,  $J = 6.2$  Hz, 3H),  $\delta$  1.28 (d,  $J = 6.4$  Hz, 3H), 1.24-1.47 (m, 22H),  $\delta$  1.34 (s, 3H),  $\delta$  1.52 (s, 3H), 1.64-1.76 (m, 2H),  $\delta$  2.35 (m, 1H),  $\delta$  2.47 (m, 1H),  $\delta$  3.12 (d,  $J_{\text{OH}} = 6.4$  Hz, 1H),  $\delta$  3.35 (dd,  $J = 3.1, 8.2$  Hz, 1H),  $\delta$  3.49 (m, 1H),  $\delta$  3.52 (dd,  $J = 7.3, 10.1$  Hz, 1H),  $\delta$  3.85-3.94 (m, 2H),  $\delta$  4.01 (d,  $J = 5.4$  Hz, 1H),  $\delta$  4.14 (dd,  $J = 3.0, 3.1$  Hz, 1H),  $\delta$  4.19 (dd,  $J = 5.5, 7.0$  Hz, 1H),  $\delta$  4.53 (d,  $J = 11.5$  Hz, 1H),  $\delta$  4.73 (d,  $J = 11.5$  Hz, 1H),  $\delta$  4.97 (s, 1H),  $\delta$  5.09 (dd,  $J = 3.0, 5.4$  Hz, 1H),  $\delta$  5.29 (d,  $J = 5.4$  Hz, 1H),  $\delta$  7.28-7.37 (m, 5H);  $^{13}\text{C}$  NMR ( $\text{CDCl}_3$ , 150 MHz):  $\delta$  173.2, 137.7, 128.4, 128.0, 127.9, 109.4, 96.5, 95.5, 83.5, 81.0, 77.9, 77.7, 75.9, 73.4, 72.4, 69.7, 67.9, 64.3, 34.9, 33.9, 32.8, 32.0, 29.4, 29.3, 28.1, 28.0, 27.7, 26.6, 25.6, 24.9, 23.0, 22.7, 22.6, 19.0, 17.7, 14.0; HRMS (ESI): calcd for  $[\text{C}_{38}\text{H}_{60}\text{O}_{10} + \text{Na}]^+$  699.4084, found 699.4079.

<sup>7</sup> C-2 macrolactone was assigned incorrectly as the C-3 macrolactone in reference 6

## Position of macrolactone and sugar linkage<sup>8</sup>

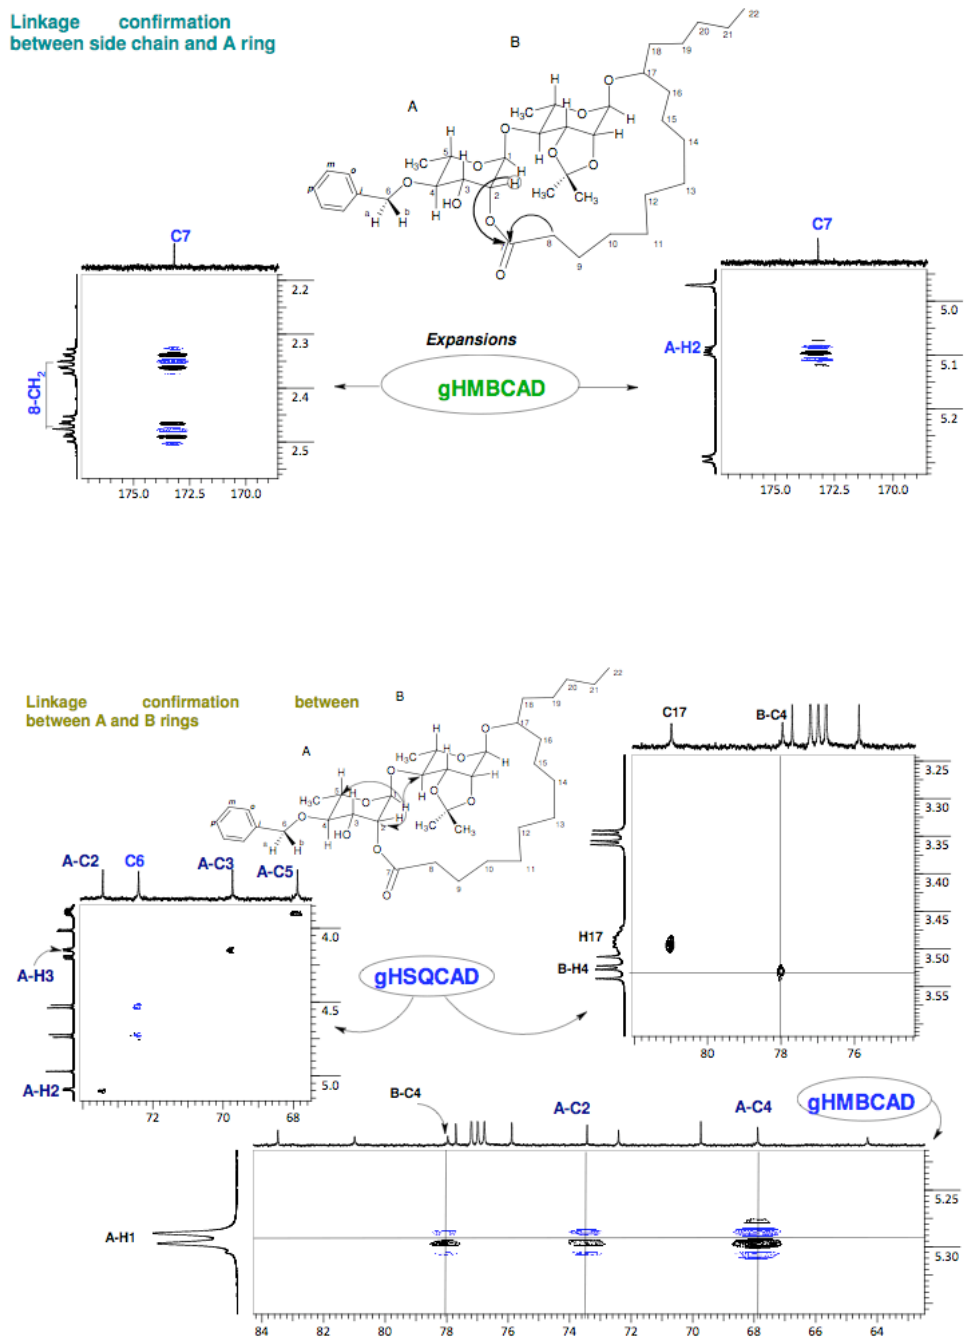

<sup>8</sup> See spectral data for full correlation studies

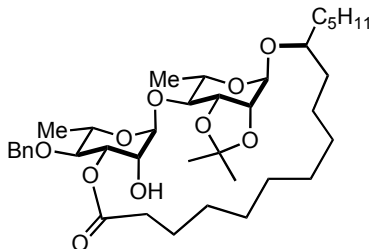

**21:**<sup>9</sup> Colorless oil;  $R_f$  (20% EtOAc/hexane) = 0.31;  $[\alpha]_D^{25} = -9.1$  ( $c$  0.7,  $\text{CHCl}_3$ ); IR (thin film,  $\text{cm}^{-1}$ )  $\nu$  3446, 2986, 2872, 1740, 1710, 1486, 1038, 984, 866;  $^1\text{H}$  NMR ( $\text{CDCl}_3$ , 600 MHz):  $\delta$  0.87 (t,  $J = 7.2$  Hz, 3H),  $\delta$  1.28 (d,  $J = 6.3$  Hz, 3H),  $\delta$  1.32 (d,  $J = 6.3$  Hz, 3H),  $\delta$  1.21-1.53 (m, 16H),  $\delta$  1.56-1.73 (m, 8H),  $\delta$  1.34 (s, 3H), 1.50 (s, 3H),  $\delta$  2.03 (d,  $J_{\text{(OH)}} = 4.6$  Hz, 1H),  $\delta$  2.34 (t,  $J = 6.4$  Hz, 2H),  $\delta$  3.38-3.46 (m, 1H),  $\delta$  3.53-3.59 (m, 2H),  $\delta$  3.90-4.01 (m, 2H),  $\delta$  4.04-4.07 (m, 2H),  $\delta$  4.22 (dd,  $J = 5.5, 5.9$  Hz, 1H),  $\delta$  4.60 (d,  $J = 11.2$  Hz, 1H),  $\delta$  4.68 (d,  $J = 11.2$  Hz, 1H),  $\delta$  4.90 (s, 1H),  $\delta$  5.12 (s, 1H),  $\delta$  5.34 (dd,  $J = 2.7, 9.2$  Hz, 1H),  $\delta$  7.26-7.35 (m, 5H);  $^{13}\text{C}$  NMR ( $\text{CDCl}_3$ , 150 MHz):  $\delta$  173.2, 138.0, 128.3, 127.8, 127.7, 109.6, 98.0, 96.7, 80.3, 78.9, 78.5, 76.5, 74.7, 74.1, 73.9, 71.0, 69.2, 66.2, 34.2, 33.9, 32.0, 29.7, 29.5, 28.5, 27.7, 27.5, 27.0, 26.1, 25.9, 24.8, 23.8, 22.7, 22.6, 19.5, 17.8, 14.0. HRMS (ESI): calcd for  $[\text{C}_{38}\text{H}_{60}\text{O}_{10} + \text{Na}]^+$  699.4084, found 699.4079.

<sup>9</sup> C-2 macrolactone was assigned incorrectly as the C-3 macrolactone in reference 6

## Position of macrolactone and sugar linkage<sup>10</sup>

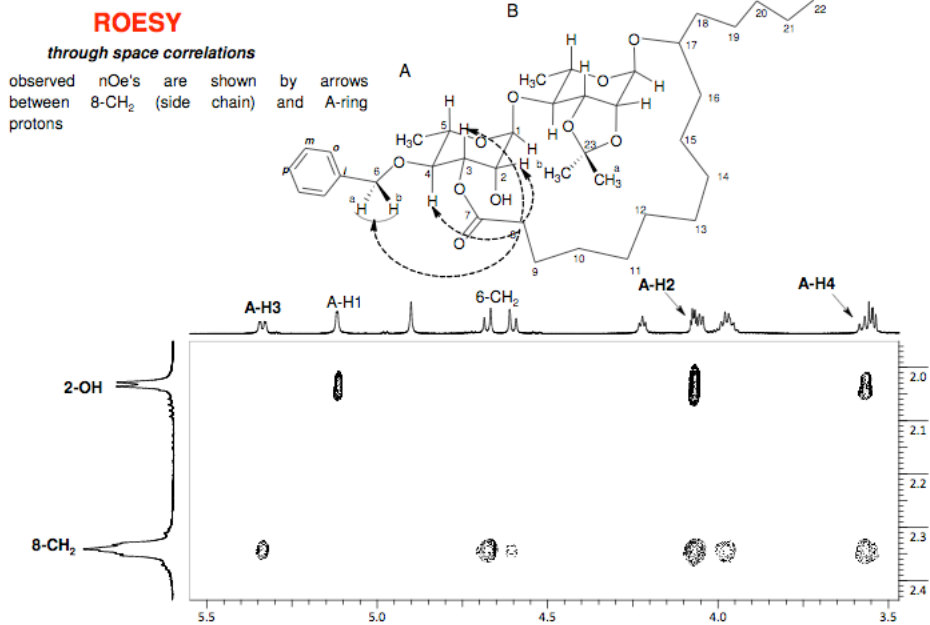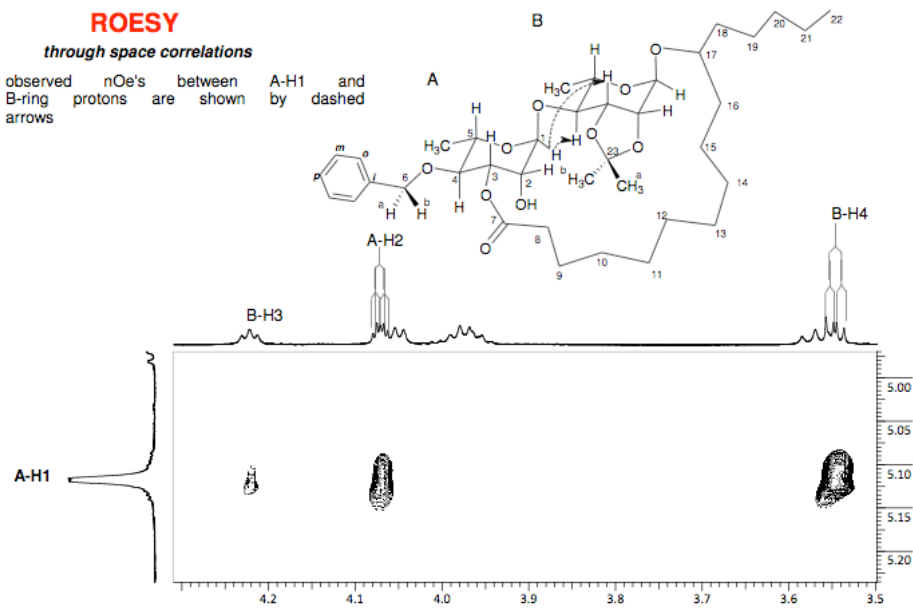

<sup>10</sup> See spectral data for full correlation studies

### Lactone isomerization:

The C-2 macrolactone **20** (291 mg, 0.43 mmol) was dissolved in 25 mL dry toluene and cooled to 0 °C. To this cold solution, 64.20  $\mu$ L DBU was added and stirred under argon, slowly rising to ambient temperature. After 12h, the reaction mixture was cooled back to 0 °C and diluted with Et<sub>2</sub>O. A cold solution of 1N HCl was added and the aqueous layer was extracted with Et<sub>2</sub>O. The combined organic layer was washed with NaHCO<sub>3</sub> and brine. Dried over Na<sub>2</sub>SO<sub>4</sub> and concentrated under reduced pressure. <sup>1</sup>H NMR of the crude reaction mixture showed a 2:1 mixture of C-2 macrolactone **20** and C-3 macrolactone **21**. The mixture was taken to next step without further purification.

### Glycosyl acceptors **9** and **22**

A mixture of C-2 macrolactone **20** and C-3 macrolactone **21** (300 mg, 0.44 mmol) was dissolved in dry CH<sub>2</sub>Cl<sub>2</sub> (1.0 mL). The mixture was then cooled to 0 °C and added pyridine (75  $\mu$ L, 0.92 mmol) and chloroacetic anhydride (151 mg, 0.88 mmol). The resulting mixture was stirred under argon from 0 °C to rt over 2h. Diluted with CH<sub>2</sub>Cl<sub>2</sub> and quenched with 1N HCl at 0 °C. The aqueous layer was extracted with CH<sub>2</sub>Cl<sub>2</sub> (50mL x 3) and the combined organic layer was washed with saturated NaHCO<sub>3</sub> and brine. Dried over Na<sub>2</sub>SO<sub>4</sub> and concentrated under reduced pressure. The reaction mixture was then passed through a short pad of silica gel to obtain crude chloroacetic ester, which was dissolved in EtOAc (5 mL) and few drops of MeOH. Pd/C (50 mg) was added and under H<sub>2</sub> balloon pressure the reaction was stirred for 3h. The solid Pd/C catalyst was removed by filtration through a celite pad. Filtrate was concentrated under reduced pressure and purified by silica gel chromatography. The C-3 glycosyl acceptor **9** (43 mg) was obtained using 12% EtOAc/hexane and the C-2 glycosyl acceptor **22** (202 mg) was obtained by using 18-20% EtOAc/hexane. The combined yield for 2 steps was 84%.

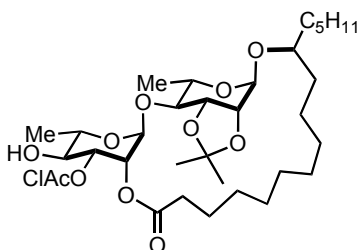

**22:** Colorless oil:  $R_f$  (20% acetone/hexane) = 0.45;  $[\alpha]_D^{25} = -44.81$  ( $c$  1.69,  $\text{CH}_2\text{Cl}_2$ ); IR (thin film,  $\text{cm}^{-1}$ )  $\nu$  3456, 3018, 2864, 1780, 1736, 1470, 1030, 976, 856;  $^1\text{H}$  NMR ( $\text{C}_6\text{D}_6$ , 400 MHz):  $\delta$  0.90 (t,  $J = 7.2$  Hz, 3H),  $\delta$  1.19-1.32 (m, 28H),  $\delta$  1.41 (d,  $J = 6.6$  Hz, 3H), 1.46 (s, 3H),  $\delta$  1.71 (m, 2H),  $\delta$  1.94 (d,  $J = 5.2$  Hz, 1H),  $\delta$  2.16-2.23 (m, 1H),  $\delta$  2.28-2.35 (m, 1H),  $\delta$  3.26 (brs, 1H),  $\delta$  3.41 (s, 2H),  $\delta$  3.47-3.52 (m, 1H),  $\delta$  3.96 (dd,  $J = 8.0, 9.6$  Hz, 1H),  $\delta$  4.02 (dd,  $J = 6.0, 8.0$  Hz, 1H),  $\delta$  4.18-4.23 (m, 2H),  $\delta$  4.63 (dd,  $J = 6.0, 6.4$  Hz, 1H),  $\delta$  5.16 (s, 1H),  $\delta$  5.49 (dd,  $J = 2.8, 3.6$  Hz, 1H),  $\delta$  5.54 (dd,  $J = 3.6, 5.2$  Hz, 1H),  $\delta$  5.67 (d,  $J = 5.20$  Hz, 1H);  $^{13}\text{C}$  NMR ( $\text{CDCl}_3$ , 100 MHz):  $\delta$  173.4, 167.6, 109.7, 96.1, 94.5, 80.8, 79.2, 76.6, 76.1, 75.3, 73.6, 70.6, 68.7, 64.1, 41.1, 34.9, 33.8, 33.1, 32.2, 29.9, 29.6, 29.3, 28.4, 28.3, 28.1, 26.9, 25.5, 25.2, 23.4, 22.8, 18.3, 18.0, 14.3; HRMS (ESI): calcd for  $[\text{C}_{33}\text{H}_{55}\text{ClO}_{11} + \text{Na}]^+$  685.3331, found 685.3315.

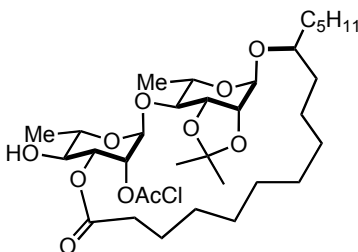

**9:** Colorless oil:  $R_f$  (20% acetone/hexane) = 0.26;  $[\alpha]_D^{25} = -34.12$  ( $c$  1.69,  $\text{CH}_2\text{Cl}_2$ ); IR (thin film,  $\text{cm}^{-1}$ )  $\nu$  3426, 3020, 2864, 1781, 1754, 1491, 1024, 976, 831, 659;  $^1\text{H}$  NMR ( $\text{C}_6\text{D}_6$ , 400 MHz):  $\delta$  0.90 (t,  $J = 7.2$  Hz, 3H),  $\delta$  1.21-1.42 (m, 29H),  $\delta$  1.47 (s, 3H),  $\delta$  1.49 (s, 3H),  $\delta$  1.64-1.74 (m, 1H),  $\delta$  2.08 (ddd,  $J = 4.4, 7.2, 14.6$  Hz, 1H),  $\delta$  2.18 (ddd,  $J = 4.4, 7.0, 14.8$  Hz, 1H),  $\delta$  2.57 (d,  $J = 5.2$  Hz, 1H),  $\delta$  3.25 (m, 1H),  $\delta$  3.32 (d,  $J = 14.8$  Hz, 1H),  $\delta$  3.43 (d,  $J = 14.8$  Hz, 1H),  $\delta$  3.78-3.87 (m, 2H),  $\delta$  4.06 (dq,  $J = 6.0, 9.8$  Hz, 1H),  $\delta$  4.19 (d,  $J = 6.0$  Hz, 1H),  $\delta$  4.24 (dq,  $J = 6.8, 6.8$  Hz, 1H),  $\delta$  4.44 (dd,  $J = 5.2, 6.0$  Hz, 1H),  $\delta$  5.11 (s, 1H),  $\delta$  5.46 (dd,  $J = 2.8, 10.2$  Hz, 1H),  $\delta$  5.48 (s, 1H),  $\delta$  5.68 (s, 1H);  $^{13}\text{C}$  NMR ( $\text{CDCl}_3$ , 100 MHz):  $\delta$  176.7, 166.6, 110.2, 96.2, 95.7, 80.0,

79.4, 74.2, 73.5, 73.2, 71.7, 70.5, 65.8, 41.0, 34.4, 34.2, 33.9, 32.3, 29.9, 29.6, 28.9, 28.8, 28.5, 27.9, 27.8, 26.3, 25.4, 25.1, 25.0, 22.8, 19.8, 17.7, 14.3; HRMS (ESI): calcd for  $[C_{33}H_{55}ClO_{11} + Na]^+$  685.3331, found 685.3315.

**1-Benzyl-2,3-didehydro-5-methyl-4-oxo-pyranosyl-(1→4)-2,3-O-isopropylidene- $\alpha$ -L-rhamnopyranoside **23a-i**<sup>11</sup>**

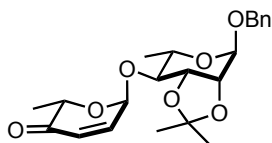

Glycosyl acceptor **23a** (2.17 g, 7.40 mmol) was dissolved in 15 mL dry  $CH_2Cl_2$ . To this added  $\alpha$ -L-Boc-pyranone **5** (2.53 g, 11.10 mmol). The reaction mixture was cooled to 0 °C and added a premixed solution of  $Pd_2(dba)_3 \cdot CHCl_3$  (574 mg, 0.55 mmol) and  $PPh_3$  (584 mg, 2.20 mmol) in  $CH_2Cl_2$  via cannula under argon. The reaction mixture was stirred under argon at 0 °C overnight. Concentrated the reaction mixture under reduced pressure and flash chromatography with 10% EtOAc/hexane yielded the desired product **23a-i** (3.02 g, 94%). Colorless oil:  $R_f$  (20% hexanes/EtOAc) = 0.6;  $[\alpha]_D^{25} = -12.16$  (c 1.09,  $CH_2Cl_2$ ); IR (thin film,  $cm^{-1}$ )  $\nu$  2854, 1741, 1680, 1154, 1071, 861;  $^1H$  NMR ( $CDCl_3$ , 400 MHz):  $\delta$  1.29 (d,  $J = 6.6$  Hz, 3H),  $\delta$  1.34 (s, 3H),  $\delta$  1.38 (d,  $J = 6.8$  Hz, 3H),  $\delta$  1.56 (s, 3H),  $\delta$  3.67-3.79 (m, 2H),  $\delta$  4.18 (d,  $J = 3.2$  Hz, 1H),  $\delta$  4.25 (dd,  $J = 8.0, 8.4$  Hz, 1H),  $\delta$  4.49-4.56 (m, 2H),  $\delta$  4.71 (d,  $J = 11.6$  Hz, 1H),  $\delta$  5.08 (s, 1H),  $\delta$  5.77 (s, 1H),  $\delta$  6.07 (d,  $J = 9.6$  Hz, 1H),  $\delta$  6.85 (dd,  $J = 3.0, 9.4$  Hz, 1H),  $\delta$  7.29-7.34 (m, 5H);  $^{13}C$  NMR ( $CDCl_3$ , 100 MHz):  $\delta$  196.9, 143.7, 137.1, 128.6, 128.3, 128.1, 127.1, 109.6, 96.2, 92.4, 78.9, 76.4, 70.5, 69.3, 64.3, 28.1, 26.5, 17.8, 15.2; HRMS (ESI): calcd for  $[C_{22}H_{28}O_7 + Na]^+$  427.1733, found 427.1720.

<sup>11</sup> Compound **23a-i** was involved in the transformation (**23a** to **4**), which is not represented in Scheme 5.



**1-*p*-Methoxybenzyl-2,3-didehydro-5-methyl-4-oxo-pyranosyl-(1→4)-2,3-*O*-isopropylidene- $\alpha$ -L-rhamnopyranoside **23b-i**<sup>12</sup>**

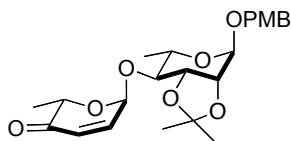

Compound **23b-i** was prepared from **23b** following the same procedure as for **23a-i**.

Colorless solid:  $R_f$  (15% hexanes/EtOAc) = 0.43; mp: 98 °C;  $[\alpha]_D^{25} = -12.84$  ( $c$  2.32, CH<sub>2</sub>Cl<sub>2</sub>); IR (thin film, cm<sup>-1</sup>)  $\nu$  2855, 1740, 1709, 1168, 1071, 866; <sup>1</sup>H NMR (CDCl<sub>3</sub>, 400 MHz):  $\delta$  1.29 (d,  $J = 6.0$  Hz, 3H),  $\delta$  1.33 (s, 3H),  $\delta$  1.38 (d,  $J = 6.8$  Hz, 3H),  $\delta$  1.55 (s, 3H),  $\delta$  3.67 (dd,  $J = 7.2, 9.2$  Hz, 1H),  $\delta$  3.74 (dq,  $J = 6.0, 9.6$  Hz, 1H),  $\delta$  3.79 (s, 3H),  $\delta$  4.14 (d,  $J = 3.2$  Hz, 1H),  $\delta$  4.20 (dd,  $J = 3.0, 7.4$  Hz, 1H),  $\delta$  4.51 (d,  $J = 11.6$  Hz, 1H),  $\delta$  4.63 (d,  $J = 11.6$  Hz, 1H),  $\delta$  4.54 (q,  $J = 7.2$  Hz, 1H),  $\delta$  5.04 (s, 1H),  $\delta$  5.77 (d,  $J = 3.6$  Hz, 1H),  $\delta$  6.07 (d,  $J = 9.6$  Hz, 1H),  $\delta$  6.85 (dd,  $J = 3.8, 10.4$  Hz, 1H),  $\delta$  6.89 (d,  $J = 8.8$  Hz, 2H),  $\delta$  7.27 (d,  $J = 8.6$  Hz, 2H); <sup>13</sup>C NMR (CDCl<sub>3</sub>, 100 MHz):  $\delta$  197.2, 159.6, 143.8, 130.2, 129.1, 127.2, 114.1, 109.7, 95.9, 92.4, 78.9, 78.8, 76.5, 70.6, 68.9, 64.3, 55.5, 28.2, 26.5, 17.9, 15.3; HRMS (ESI): calcd for [C<sub>23</sub>H<sub>30</sub>O<sub>8</sub> + Na]<sup>+</sup> 457.1838, found 457.1830.

**1-Benzyl-2,3-didehydro-5-methyl-4-oxo-pyranosyl-(1→4)- $\alpha$ -L-rhamnopyranoside **4****

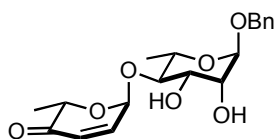

Acetonide protected *syn*-diol **23a-i** (1.0 g, 2.3 mmol) was dissolved in 24.70 mL CH<sub>2</sub>Cl<sub>2</sub>. Cooled to 0 °C and slowly added 2.50 mL aqueous solution TFA (10:1). The reaction mixture was stirred at 0 °C for 10 min and quenched with Et<sub>3</sub>N. Water was added and the aqueous phase extracted with CH<sub>2</sub>Cl<sub>2</sub> (100 mL x 3). The combined organic layer was washed with 1N HCl, saturated NaHCO<sub>3</sub> and brine. The organic layer was dried over Na<sub>2</sub>SO<sub>4</sub> and concentrated under reduced pressure. Silica gel chromatography with 50% EtOAc/hexane gave diol **4** (788 mg, 94%). Colorless oil:  $R_f$  (50% hexanes/EtOAc) = 0.31;  $[\alpha]_D^{25} = -15.42$  ( $c$  1.95, CH<sub>2</sub>Cl<sub>2</sub>); IR (thin film,

<sup>12</sup> Compound **23b-i** was involved in the transformation (**23b** to **24**), which is not represented in Scheme 5.

cm<sup>-1</sup>)  $\nu$  3460, 3320, 2950, 1741, 1681, 1023, 964, 866; <sup>1</sup>H NMR (CDCl<sub>3</sub>, 400 MHz):  $\delta$  1.33 (d,  $J$  = 6.0 Hz, 3H),  $\delta$  1.37 (d,  $J$  = 6.8 Hz, 3H),  $\delta$  3.0 (d,  $J$  = 8.0 Hz, 1H),  $\delta$  3.1 (d,  $J$  = 4.4 Hz, 1H),  $\delta$  3.68 (dd,  $J$  = 9.6, 9.6 Hz, 1H),  $\delta$  3.75 (dq,  $J$  = 6.6, 9.6 Hz, 1H),  $\delta$  3.91 (s, 1H),  $\delta$  3.97 (dd,  $J$  = 3.2, 8.4 Hz, 1H),  $\delta$  4.46 (d,  $J$  = 11.6 Hz, 1H),  $\delta$  4.69 (d,  $J$  = 11.6 Hz, 1H),  $\delta$  4.57 (q,  $J$  = 6.8 Hz, 1H),  $\delta$  4.84 (s, 1H),  $\delta$  5.74 (d,  $J$  = 3.2 Hz, 1H),  $\delta$  6.06 (d,  $J$  = 10.0 Hz, 1H),  $\delta$  6.89 (dd,  $J$  = 2.0, 9.6 Hz, 1H),  $\delta$  7.29-7.35 (m, 5H); <sup>13</sup>C NMR (CDCl<sub>3</sub>, 100 MHz):  $\delta$  197.3, 143.8, 137.1, 128.6, 128.2, 128.1, 126.9, 98.8, 94.2, 79.6, 76.9, 72.5, 71.7, 70.7, 69.4, 18.1, 15.2; HRMS (ESI): calcd for [C<sub>19</sub>H<sub>24</sub>O<sub>7</sub> + Na]<sup>+</sup> 387.1420, found 387.1418.

**1-*p*-Methoxybenzyl-2,3-didehydro-5-methyl-4-oxo-pyranosyl-(1→4)- $\alpha$ -L-rhamnopyranoside **24****

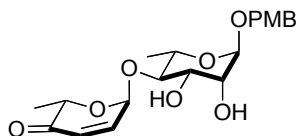

Compound **24** was prepared from **23b-i** following the same procedure as for **4**.

Colorless oil:  $R_f$  (50% hexanes/EtOAc) = 0.45;  $[\alpha]_D^{25} = -22.56$  ( $c$  1.03, CH<sub>2</sub>Cl<sub>2</sub>); IR (thin film, cm<sup>-1</sup>)  $\nu$  3469, 3305, 2950, 1741, 1680, 1168, 954, 864; <sup>1</sup>H NMR (CDCl<sub>3</sub>, 400 MHz):  $\delta$  1.34 (d,  $J$  = 6.0 Hz, 3H),  $\delta$  1.37 (d,  $J$  = 6.4 Hz, 3H),  $\delta$  2.69 (brs, 1H),  $\delta$  3.66 (dd,  $J$  = 8.8, 9.6 Hz, 1H),  $\delta$  3.75 (dq,  $J$  = 6.0, 9.6 Hz, 1H),  $\delta$  3.79 (s, 3H),  $\delta$  3.87 (dd,  $J$  = 1.6, 3.2 Hz, 1H),  $\delta$  3.96 (dd,  $J$  = 2.8, 8.8 Hz, 1H),  $\delta$  4.42 (d,  $J$  = 11.6 Hz, 1H),  $\delta$  4.62 (d,  $J$  = 11.6 Hz, 1H),  $\delta$  4.57 (q,  $J$  = 7.6 Hz, 1H),  $\delta$  4.82 (s, 1H),  $\delta$  5.74 (d,  $J$  = 3.6 Hz, 1H),  $\delta$  6.07 (d,  $J$  = 10.4 Hz, 1H),  $\delta$  6.86 (d,  $J$  = 8.8 Hz, 2H),  $\delta$  6.85 (dd,  $J$  = 4.0, 9.6 Hz, 1H),  $\delta$  7.24 (d,  $J$  = 8.0 Hz, 2H); <sup>13</sup>C NMR (CDCl<sub>3</sub>, 100 MHz):  $\delta$  197.2, 159.6, 143.8, 129.9, 129.1, 127.0, 114.0, 98.5, 94.2, 79.7, 72.5, 71.8, 70.8, 69.1, 66.7, 55.5, 18.1, 15.5; HRMS (ESI): calcd for [C<sub>20</sub>H<sub>26</sub>O<sub>8</sub> + Na]<sup>+</sup> 417.1525, found 417.1526.

**1-Benzyl-2,3-didehydro-5-methyl-4-oxo-pyranosyl-(1→4)-3-*O*-isobutyral- $\alpha$ -L-rhamnopyranoside **25a****

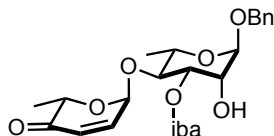

The *syn*-diol **4** (1.8 g, 4.94 mmol) was dissolved in 82.30 mL toluene. The reaction mixture was stirred at rt for 10 min until all starting material dissolved.  $\text{Bu}_2\text{SnO}$  (1.48 g, 5.93 mmol) was added and refluxed for 3h under argon. During reflux, the reaction turned faint yellowish in color. Toluene was removed under reduced pressure and the residue was dried under high vacuum for 30 min. dissolved the residue in dry  $\text{CH}_3\text{CN}$  (49 mL) and cooled to 0 °C. DIPEA (1.20 mL, 6.92 mmol) was added followed by slow addition of isobutyrylchloride (0.73 mL, 6.91 mmol). The reaction mixture was stirred at this temperature for 1h then diluted with  $\text{CH}_2\text{Cl}_2$  and quenched with saturated  $\text{NaHCO}_3$ . The aqueous phase extracted with  $\text{CH}_2\text{Cl}_2$  (100 mL x 2). The combined organic layer was washed with saturated brine, dried over  $\text{Na}_2\text{SO}_4$  and concentrated under reduced pressure. Silica gel chromatography with 25% EtOAc/hexane gave isobutyric ester **25a** (1.72 g, 80%). Colorless oil:  $R_f$  (40% hexanes/EtOAc) = 0.65;  $[\alpha]_D^{25} = -20.10$  ( $c$  1.43,  $\text{CH}_2\text{Cl}_2$ ); IR (thin film,  $\text{cm}^{-1}$ )  $\nu$  3327, 2930, 1814, 1756, 1638, 1168, 1071, 864;  $^1\text{H}$  NMR ( $\text{CDCl}_3$ , 400 MHz):  $\delta$  1.20 (d,  $J = 6.4$  Hz, 6H),  $\delta$  1.35 (d,  $J = 6.2$  Hz, 3H),  $\delta$  1.36 (d,  $J = 6.2$  Hz, 3H),  $\delta$  2.19 (brs, 1H),  $\delta$  2.63 (septet,  $J = 6.8$  Hz, 1H),  $\delta$  3.86 (dq,  $J = 6.4, 8.6$  Hz, 1H),  $\delta$  3.94 (dd,  $J = 9.6, 9.6$  Hz, 1H),  $\delta$  4.09 (s, 1H),  $\delta$  4.50 (d,  $J = 11.6$  Hz, 1H),  $\delta$  4.53 (q,  $J = 6.8$  Hz, 1H),  $\delta$  4.72 (d,  $J = 11.6$  Hz, 1H),  $\delta$  4.81 (s, 1H),  $\delta$  5.25 (dd,  $J = 2.0, 9.2$  Hz, 1H),  $\delta$  5.41 (d,  $J = 2.4$  Hz, 1H),  $\delta$  6.07 (d,  $J = 10.4$  Hz, 1H),  $\delta$  6.63 (dd,  $J = 3.2, 10.4$  Hz, 1H),  $\delta$  7.27-7.33 (m, 5H);  $^{13}\text{C}$  NMR ( $\text{CDCl}_3$ , 100 MHz):  $\delta$  196.7, 176.1, 142.6, 137.1, 128.6, 128.1, 127.4, 98.6, 94.3, 74.9, 70.7, 69.7, 69.4, 67.2, 34.3, 19.2, 19.1, 18.1, 15.0; HRMS (ESI): calcd for  $[\text{C}_{23}\text{H}_{30}\text{O}_8 + \text{Na}]^+$  457.1838, found 457.1833.

**1-*p*-Methoxybenzyl-2,3-didehydro-5-methyl-4-oxo-pyranosyl-(1→4)-3-*O*-isobutyral- $\alpha$ -L rhamnopyranoside **25b****

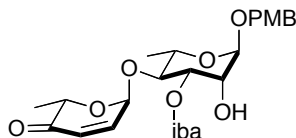

Compound **25b** was prepared from **24** following the same procedure as for **25a**.

Colorless oil:  $R_f$  (40% hexanes/EtOAc) = 0.62;  $[\alpha]_D^{25} = -14.34$  ( $c$  0.97,  $\text{CH}_2\text{Cl}_2$ ); IR (thin film,  $\text{cm}^{-1}$ )  $\nu$  3340, 2950, 2848, 1814, 1741, 1684, 1168, 1073, 864, 684;  $^1\text{H}$  NMR ( $\text{CDCl}_3$ , 400 MHz):  $\delta$  1.21 (d,  $J = 6.4$  Hz, 6H),  $\delta$  1.33 (d,  $J = 6.4$  Hz, 3H),  $\delta$  1.37 (d,  $J = 6.2$  Hz, 3H),  $\delta$  2.04 (brs, 1H),  $\delta$  2.62 (septet,  $J = 6.8$  Hz, 1H),  $\delta$  3.79 (s, 3H),  $\delta$  3.85 (dq,  $J = 6.0, 9.2$  Hz, 1H),  $\delta$  3.90 (dd,  $J = 8.0, 9.2$  Hz, 1H),  $\delta$  4.05 (s, 1H),  $\delta$  4.47 (d,  $J = 11.6$  Hz, 1H),  $\delta$  4.54 (q,  $J = 5.6$  Hz, 1H),  $\delta$  4.65 (d,  $J = 11.6$  Hz, 1H),  $\delta$  4.80 (s, 1H),  $\delta$  5.19 (dd,  $J = 2.5, 9.0$  Hz, 1H),  $\delta$  5.41 (d,  $J = 1.5$  Hz, 1H),  $\delta$  6.01 (d,  $J = 7.6$  Hz, 1H),  $\delta$  6.62 (dd,  $J = 1.6, 8.4$  Hz, 1H),  $\delta$  6.86 (d,  $J = 6.4$  Hz, 2H),  $\delta$  7.24 (d,  $J = 6.2$  Hz, 2H);  $^{13}\text{C}$  NMR ( $\text{CDCl}_3$ , 100 MHz):  $\delta$  196.7, 176.1, 159.6, 142.6, 129.9, 129.1, 127.5, 114.0, 98.3, 94.3, 75.0, 70.8, 69.8, 69.1, 67.2, 55.5, 34.4, 19.3, 19.2, 18.1, 15.1; HRMS (ESI): calcd for  $[\text{C}_{24}\text{H}_{32}\text{O}_9 + \text{Na}]^+$  487.1944, found 487.1955.

**1-Benzyl-2,3-didehydro-5-methyl-4-oxo-pyranosyl-(1→4)-2-*O*-chloroacetyl-3-*O*-isobutyral- $\alpha$ -L rhamnopyranoside **25a-i**<sup>13</sup>**

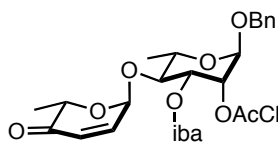

Alcohol **25a** (1.1 g, 2.53 mmol) was dissolved in dry  $\text{CH}_2\text{Cl}_2$  (9.0 mL). The mixture was then cooled to 0 °C and added pyridine (0.51 mL, 6.33 mmol), chloroacetic anhydride (866 mg, 5.06 mmol) and DMAP (154 mg, 1.26 mmol). The resulting mixture was stirred under argon from 0 °C to rt over 2h. Diluted with  $\text{CH}_2\text{Cl}_2$  and quenched with 1N HCl at 0 °C. The aqueous layer was extracted with  $\text{CH}_2\text{Cl}_2$  (50 mL x 3) and the combined organic layer was washed with saturated  $\text{NaHCO}_3$  and brine. Dried over  $\text{Na}_2\text{SO}_4$  and concentrated under reduced pressure. Silica gel

<sup>13</sup> Compound **25a-i** was involved in the transformation (**25a** to **26a**), which is not represented in Scheme 5.

chromatography using 10-12% EtOAc/hexane to obtain **25a-i** (1.25 g, 97%). Colorless oil:  $R_f$  (20% acetone/hexane) = 0.60;  $[\alpha]_D^{25} = -60.89$  ( $c$  1.05,  $\text{CH}_2\text{Cl}_2$ ); IR (thin film,  $\text{cm}^{-1}$ )  $\nu$  2954, 2861, 1768, 1741, 1672, 1534, 1129, 1030, 866;  $^1\text{H}$  NMR ( $\text{CDCl}_3$ , 400 MHz):  $\delta$  1.17 (d,  $J = 6.4$  Hz, 6H),  $\delta$  1.37 (d,  $J = 6.4$  Hz, 3H),  $\delta$  1.39 (d,  $J = 6.4$  Hz, 3H),  $\delta$  2.52 (septet,  $J = 7.2$  Hz, 1H),  $\delta$  3.89 (m, 2H),  $\delta$  4.07 (d,  $J = 15.2$  Hz, 1H),  $\delta$  4.15 (d,  $J = 15.2$  Hz, 1H),  $\delta$  4.52 (d,  $J = 12.4$  Hz, 1H),  $\delta$  4.72 (d,  $J = 12.4$  Hz, 1H),  $\delta$  4.55 (q,  $J = 6.4$  Hz, 1H),  $\delta$  4.79 (s, 1H),  $\delta$  5.35-5.40 (m, 3H),  $\delta$  6.08 (d,  $J = 9.6$  Hz, 1H),  $\delta$  6.59 (dd,  $J = 3.2, 9.6$  Hz, 1H),  $\delta$  7.34 (m, 5H);  $^{13}\text{C}$  NMR ( $\text{CDCl}_3$ , 100 MHz):  $\delta$  196.3, 175.7, 166.6, 142.2, 136.6, 128.7, 128.2, 128.1, 127.5, 96.2, 94.5, 72.4, 71.9, 70.8, 69.6, 67.3, 40.8, 34.2, 18.9, 17.9, 15.0; HRMS (ESI): calcd for  $[\text{C}_{25}\text{H}_{31}\text{ClO}_9 + \text{Na}]^+$  533.1654, found 533.1660.

**1-*p*-Methoxybenzyl-2,3-didehydro-5-methyl-4-oxo-pyranosyl-(1→4)-2-*O*-chloroacetyl-3-*O*-isobutyral- $\alpha$ -L rhamnopyranoside **25b-i**<sup>14</sup>**

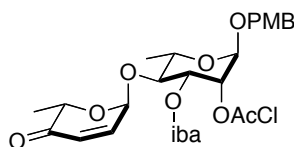

Compound **25b-i** was prepared from **25b** following the same procedure as for **25a-i**.

Colorless solid:  $R_f$  (30% acetone/hexane) = 0.82; mp: 118 °C;  $[\alpha]_D^{25} = -22.66$  ( $c$  0.48,  $\text{CH}_2\text{Cl}_2$ ); IR (thin film,  $\text{cm}^{-1}$ )  $\nu$  2954, 2864, 1768, 1736, 1682, 1534, 1030, 976, 866;  $^1\text{H}$  NMR ( $\text{CDCl}_3$ , 400 MHz):  $\delta$  1.16 (d,  $J = 6.4$  Hz, 6H),  $\delta$  1.35 (d,  $J = 6.4$  Hz, 3H),  $\delta$  1.39 (d,  $J = 7.2$  Hz, 3H),  $\delta$  2.51 (septet,  $J = 7.2$  Hz, 1H),  $\delta$  3.80 (s, 3H),  $\delta$  3.86-3.88 (m, 2H),  $\delta$  4.06 (d,  $J = 15.2$  Hz, 1H),  $\delta$  4.13 (d,  $J = 15.2$  Hz, 1H),  $\delta$  4.48 (d,  $J = 11.8$  Hz, 1H),  $\delta$  4.64 (d,  $J = 11.8$  Hz, 1H),  $\delta$  4.55 (q,  $J = 6.4$  Hz, 1H),  $\delta$  4.76 (s, 1H),  $\delta$  5.32-5.35 (m, 2H),  $\delta$  5.40 (d,  $J = 3.6$  Hz, 1H),  $\delta$  6.01 (d,  $J = 10.4$  Hz, 1H),  $\delta$  6.62 (dd,  $J = 4.0, 10.4$  Hz, 1H),  $\delta$  6.88 (d,  $J = 8.4$  Hz, 2H),  $\delta$  7.26 (d,  $J = 8.8$  Hz, 2H);  $^{13}\text{C}$  NMR ( $\text{CDCl}_3$ , 100 MHz):  $\delta$  196.4, 175.7, 166.7, 159.7, 142.2, 130.0, 128.6, 114.1, 95.9, 94.5, 72.4, 72.0, 70.8, 69.3, 67.3, 55.5, 40.8, 34.2, 29.9, 18.9, 18.0, 15.1; HRMS (ESI): calcd for  $[\text{C}_{26}\text{H}_{33}\text{ClO}_{10} + \text{Na}]^+$  563.1660, found 563.1671.

<sup>14</sup> Compound **25b-i** was involved in the transformation (**25b** to **26b**), which is not represented in Scheme 5.

**1-Benzyl-2,3-didehydro- $\alpha$ -L-rhamnopyranosyl-(1 $\rightarrow$ 4)-2-O-chloroacetyl-3-O-isobutyral- $\alpha$ -L-rhamnopyranoside **25a-ii**<sup>15</sup>**

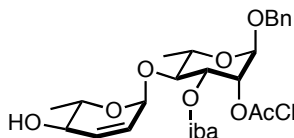

Enone **25a-i** (1.50 g, 2.94 mmol) was dissolved in 29.40 mL dry  $\text{CH}_2\text{Cl}_2$  and cooled to  $-78\text{ }^\circ\text{C}$ . To this added a 0.4 M solution of  $\text{CeCl}_3 \cdot \text{MeOH}$  (5.90 mL). After stirring for 10 min at this temperature, added solid  $\text{NaBH}_4$  (223 mg, 5.87 mmol) in portions. The reaction mixture was stirred at  $-78\text{ }^\circ\text{C}$  for 2h. Quenched with saturated  $\text{NaHCO}_3$  at low temperature, diluted with  $\text{CH}_2\text{Cl}_2$  and warmed up to  $0\text{ }^\circ\text{C}$ . The aqueous layer was extracted with  $\text{CH}_2\text{Cl}_2$  (100mL x 3) and the combined organic layer was washed with saturated brine. Dried over  $\text{Na}_2\text{SO}_4$  and concentrated under reduced pressure. Silica gel chromatography using 20% EtOAc/hexane to obtain allylic alcohol **25a-ii** (1.40 g, 93%). Colorless solid:  $R_f$  (20% acetone/hexane) = 0.25; mp:  $146\text{ }^\circ\text{C}$ ;  $[\alpha]_D^{25} = -66.92$  ( $c$  0.80,  $\text{CH}_2\text{Cl}_2$ ); IR (thin film,  $\text{cm}^{-1}$ )  $\nu$  3420, 3300, 2962, 1790, 1751, 1682, 1537, 1215, 1027, 966;  $^1\text{H}$  NMR ( $\text{CDCl}_3$ , 400 MHz):  $\delta$  1.13 (d,  $J = 7.0$  Hz, 3H),  $\delta$  1.15 (d,  $J = 6.2$  Hz, 3H),  $\delta$  1.33 (d,  $J = 6.0$  Hz, 3H),  $\delta$  1.36 (d,  $J = 6.0$  Hz, 3H),  $\delta$  1.65 (d,  $J = 5.2$  Hz, 1H)  $\delta$  2.49 (septet,  $J = 7.6$  Hz, 1H),  $\delta$  2.56 (dq,  $J = 6.4, 9.2$  Hz, 1H),  $\delta$  3.78-3.89 (m, 3H),  $\delta$  4.06 (d,  $J = 14.8$  Hz, 1H),  $\delta$  4.14 (d,  $J = 14.8$  Hz, 1H),  $\delta$  4.54 (d,  $J = 12.0$  Hz, 1H),  $\delta$  4.71 (d,  $J = 12.0$  Hz, 1H),  $\delta$  5.78 (s, 1H),  $\delta$  5.14 (s, 1H),  $\delta$  5.34 (dd,  $J = 3.2, 8.8$  Hz, 1H),  $\delta$  5.36 (s, 1H),  $\delta$  5.58 (dd,  $J = 2.0, 10.4$  Hz, 1H),  $\delta$  5.94 (d,  $J = 10.4$  Hz, 1H),  $\delta$  7.29-7.34 (m, 5H);  $^{13}\text{C}$  NMR ( $\text{CDCl}_3$ , 100 MHz):  $\delta$  175.8, 166.7, 136.9, 134.3, 128.7, 128.2, 128.1, 125.8, 96.3, 95.5, 76.3, 72.4, 72.0, 69.5, 69.4, 68.5, 67.6, 40.8, 34.2, 18.9, 17.8, 17.7; HRMS (ESI): calcd for  $[\text{C}_{25}\text{H}_{33}\text{ClO}_9 + \text{Na}]^+$  535.1711, found 535.1704.

<sup>15</sup> Compound **25a-ii** was involved in the transformation (**25a** to **26a**), which is not represented in Scheme 5.

**1-Benzyl-2,3-didehydro-4-*O*-isobutyral- $\alpha$ -L-rhamnopyranosyl-(1 $\rightarrow$ 4)-2-*O*-chloroacetyl-3-*O*-isobutyral- $\alpha$ -L rhamnopyranoside **26a****

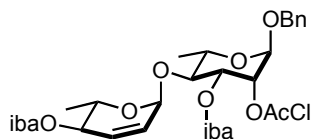

Allylic alcohol **25a-ii** (1.45 g, 2.83 mmol) was dissolved in dry CH<sub>2</sub>Cl<sub>2</sub> (28.30 mL). The mixture was then cooled to 0 °C and added pyridine (0.75 mL, 7.10 mmol), isobutyralchloride (0.59 mL, 5.65 mmol) and DMAP (173 mg, 1.42 mmol). The resulting mixture was stirred under argon from 0 °C to rt over 2h. Diluted with CH<sub>2</sub>Cl<sub>2</sub> and quenched with 1N HCl at 0 °C. The aqueous layer was extracted with CH<sub>2</sub>Cl<sub>2</sub> (50mL x 3) and the combined organic layer was washed with saturated NaHCO<sub>3</sub> and brine. Dried over Na<sub>2</sub>SO<sub>4</sub> and concentrated under reduced pressure. Silica gel chromatography using 10-15% EtOAc/hexane to obtain **26a** (1.60 g, 97%). Colorless solid:  $R_f$  (20% acetone/hexane) = 0.51; mp: 96 °C;  $[\alpha]_D^{25} = -88.54$  ( $c$  0.70, CH<sub>2</sub>Cl<sub>2</sub>); IR (thin film, cm<sup>-1</sup>)  $\nu$  2954, 1864, 1786, 1741, 1682, 1463, 11129, 1024, 864; <sup>1</sup>H NMR (CDCl<sub>3</sub>, 400 MHz):  $\delta$  1.13 (d,  $J = 6.2$  Hz, 3H),  $\delta$  1.15 (d,  $J = 6.2$  Hz, 3H),  $\delta$  1.16 (d,  $J = 6.0$  Hz, 3H),  $\delta$  1.18 (d,  $J = 6.0$  Hz, 3H),  $\delta$  1.22 (d,  $J = 6.0$  Hz, 3H),  $\delta$  1.34 (d,  $J = 6.2$  Hz, 3H),  $\delta$  2.45 (septet,  $J = 7.2$  Hz, 1H),  $\delta$  2.56 (septet,  $J = 7.2$  Hz, 1H),  $\delta$  3.79-3.94 (m, 3H),  $\delta$  4.06 (d,  $J = 14.4$  Hz, 1H),  $\delta$  4.14 (d,  $J = 14.4$  Hz, 1H),  $\delta$  4.55 (d,  $J = 12.0$  Hz, 1H),  $\delta$  4.71 (d,  $J = 12.0$  Hz, 1H),  $\delta$  4.79 (s, 1H),  $\delta$  5.04 (d,  $J = 3.0$  Hz, 1H),  $\delta$  5.18 (s, 1H),  $\delta$  5.32 (dd,  $J = 3.0, 9.6$  Hz, 1H),  $\delta$  5.36 (s, 1H),  $\delta$  5.62 (d,  $J = 10.4$  Hz, 1H),  $\delta$  5.84 (d,  $J = 10.4$  Hz, 1H),  $\delta$  7.29-7.34 (m, 5H); <sup>13</sup>C NMR (CDCl<sub>3</sub>, 100 MHz):  $\delta$  176.6, 175.5, 166.6, 136.7, 130.9, 128.7, 128.2, 128.1, 126.7, 96.3, 95.6, 76.5, 72.4, 72.0, 70.2, 69.6, 67.5, 65.5, 40.8, 34.2, 19.1, 19.0, 18.9, 17.8, 17.7; HRMS (ESI): calcd for [C<sub>29</sub>H<sub>39</sub>ClO<sub>10</sub> + Na]<sup>+</sup> 605.2129, found 605.2134.

**1-*p*-Methoxybenzyl-2,3-didehydro-4-*O*-isobutyral- $\alpha$ -L-rhamnopyranosyl-(1 $\rightarrow$ 4)-2-*O*-chloroacetyl-3-*O*-isobutyral- $\alpha$ -L rhamnopyranoside **26b****

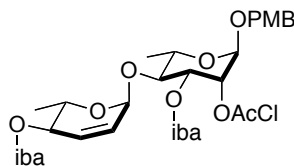

Enone **25b-i** (436 mg, 0.81 mmol) was dissolved in 8.1 mL dry CH<sub>2</sub>Cl<sub>2</sub> and cooled to -78 °C. To this added a 0.4 M solution of CeCl<sub>3</sub>•MeOH (1.5 mL). After stirring for 10 min at this temperature, added solid NaBH<sub>4</sub> (46.17 mg, 1.22 mmol) in portions. The reaction mixture was stirred at to -78 °C for 2h. Quenched with saturated NaHCO<sub>3</sub> at low temperature, diluted with CH<sub>2</sub>Cl<sub>2</sub> and warmed to 0 °C. The aqueous layer was extracted with CH<sub>2</sub>Cl<sub>2</sub> (50mL x 3) and the combined organic layer was washed with saturated brine. Dried over Na<sub>2</sub>SO<sub>4</sub> and concentrated under reduced pressure. Crude allylic alcohol was passed through a pad of celite and carried to next step without further purification. The allylic alcohol thus obtained was dissolved in dry CH<sub>2</sub>Cl<sub>2</sub> (9.0 mL). The mixture was then cooled to 0 °C and added DIPEA (240  $\mu$ L, 1.38 mmol), isobutyralchloride (135  $\mu$ L, 1.28 mmol) and DMAP (10.5 mg, 0.086 mmol). The resulting mixture was stirred under argon from 0 °C to rt over 2h. Diluted with CH<sub>2</sub>Cl<sub>2</sub> and quenched with 1N HCl at 0 °C. Organic layer was extracted with CH<sub>2</sub>Cl<sub>2</sub> (50mL x 3) and the combined organic layer was washed with saturated NaHCO<sub>3</sub> and brine. Dried over Na<sub>2</sub>SO<sub>4</sub> and concentrated under reduced pressure. Silica gel chromatography using 10% EtOAc/hexane to obtain **26b** (427 mg, 86%, 2 steps). Colorless solid:  $R_f$  (30% acetone/hexane) = 0.86; mp: 76 °C;  $[\alpha]_D^{25} = -92.24$  ( $c$  0.55, CH<sub>2</sub>Cl<sub>2</sub>); IR (thin film, cm<sup>-1</sup>)  $\nu$  2962, 1864, 1790, 1764, 1652, 1537, 1117, 1029, 964, 863; <sup>1</sup>H NMR (CDCl<sub>3</sub>, 400 MHz):  $\delta$  1.12 (d,  $J$  = 6.8 Hz, 3H),  $\delta$  1.14 (d,  $J$  = 6.4 Hz, 3H),  $\delta$  1.16 (d,  $J$  = 6.2 Hz, 3H),  $\delta$  1.18 (d,  $J$  = 6.0 Hz, 3H),  $\delta$  1.22 (d,  $J$  = 6.8 Hz, 3H),  $\delta$  1.34 (d,  $J$  = 6.4 Hz, 3H),  $\delta$  2.45 (septet,  $J$  = 7.6 Hz, 1H),  $\delta$  2.56 (septet,  $J$  = 7.2 Hz, 1H),  $\delta$  3.80 (s, 3H),  $\delta$  3.82-3.94 (m, 3H),  $\delta$  4.09 (d,  $J$  = 14.8 Hz, 1H),  $\delta$  4.13 (d,  $J$  = 14.8 Hz, 1H),  $\delta$  4.44 (d,  $J$  = 12.0 Hz, 1H),  $\delta$  4.63 (d,  $J$  = 12.0 Hz, 1H),  $\delta$  4.78 (s, 1H),  $\delta$  5.04 (d,  $J$  = 8.4 Hz, 1H),  $\delta$  5.17 (s, 1H),  $\delta$  5.30 (dd,  $J$  = 2.8, 8.6 Hz, 1H),  $\delta$  5.32 (s, 1H),  $\delta$  5.60 (dd,  $J$  = 2.0, 10.4 Hz, 1H),  $\delta$  5.84 (d,  $J$  = 10.4 Hz, 1H),  $\delta$  6.87 (d,  $J$  = 8.8 Hz, 2H),  $\delta$  7.25 (d,  $J$  = 8.8 Hz, 2H); <sup>13</sup>C NMR (CDCl<sub>3</sub>, 100 MHz):  $\delta$  176.7, 175.8, 166.7, 159.6, 130.9, 129.9, 128.7, 126.7, 114.1, 95.9, 95.5, 76.5, 72.4, 70.2, 69.2, 67.4, 65.5, 55.5, 40.8,



34.2, 19.1, 19.0, 18.9, 17.8, 17.7; HRMS (ESI): calcd for  $[C_{30}H_{41}ClO_{11}+Na]^+$  635.2235, found 635.2230.

**2,3-Didehydro-4-O-isobutyral- $\alpha$ -L-rhamnopyranosyl-(1 $\rightarrow$ 4)-2-O-chloroacetyl-3-O-isobutyral- $\alpha$ -L rhamnopyranoside **26b-i**<sup>16</sup>**

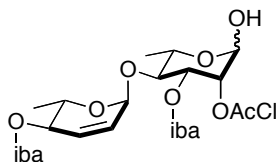

PMB ether **26b** (528 mg, 0.86 mmol) was dissolved in 3.0 mL aqueous  $CH_2Cl_2$  (20:1) and cooled to 0 °C. To this added solid DDQ (586.5 mg, 2.58 mmol) in portions. The reaction was allowed to rise to room temperature and stirred overnight at ambient temperature. Upon consumption of starting material, reaction was filtered through a short celite pad and subsequently washed with saturated  $NaHCO_3$  at 0 °C. The aqueous layer was extracted with  $CH_2Cl_2$  (50mL x 3) and the combined organic layer was washed with saturated brine. Dried over  $Na_2SO_4$  and concentrated under reduced pressure. Silica gel chromatography using 18-20% EtOAc/hexane to obtain glycosyl donor **26b-i** (348 mg, 82%) as a mixture of diastereomers (9:1,  $\alpha$ : $\beta$ ). Colorless solid:  $R_f$  (20% EtOAc/hexane) = 0.25; mp: 114-118 °C;  $[\alpha]_D^{25} = -65.54$  ( $c$  0.53,  $CH_2Cl_2$ ); IR (thin film,  $cm^{-1}$ )  $\nu$  3454, 3110, 2973, 1851, 1780, 1652, 1598, 1220, 1136, 1029, 866;  $^1H$  NMR for the major diastereomes ( $CDCl_3$ , 400 MHz):  $\delta$  1.13 (d,  $J = 6.6$  Hz, 3H),  $\delta$  1.15 (d,  $J = 6.2$  Hz, 3H),  $\delta$  1.16 (d,  $J = 6.0$  Hz, 3H),  $\delta$  1.18 (d,  $J = 7.0$  Hz, 3H),  $\delta$  1.22 (d,  $J = 6.0$  Hz, 3H),  $\delta$  1.37 (d,  $J = 6.0$  Hz, 3H),  $\delta$  2.50 (septet,  $J = 6.4$  Hz, 1H),  $\delta$  2.56 (septet,  $J = 6.4$ Hz, 1H),  $\delta$  3.13 (d,  $J = 3.6$  Hz, 1H),  $\delta$  3.81 (dd,  $J = 9.6, 9.6$  Hz, 1H),  $\delta$  3.92 (dq,  $J = 6.4, 9.6$  Hz, 1H),  $\delta$  4.09 (dq,  $J = 6.4, 6.8$  Hz, 1H),  $\delta$  4.12 (s, 2H),  $\delta$  5.04 (dd,  $J = 3.0, 9.2$  Hz, 1H),  $\delta$  5.15 (d,  $J = 3.2$  Hz, 1H),  $\delta$  5.19 (s, 1H),  $\delta$  5.33-5.35 (m, 2H),  $\delta$  5.64 (d,  $J = 10.0$  Hz, 1H),  $\delta$  5.85 (d,  $J = 10.4$  Hz, 1H);  $^{13}C$  NMR ( $CDCl_3$ , 100 MHz):  $\delta$  176.8, 175.9, 166.9, 130.9, 126.8, 95.6, 91.9, 76.4, 72.3, 71.9, 70.3, 67.4, 65.6, 40.8, 34.3, 19.1, 19.0, 18.9, 17.9, 17.7; HRMS (ESI): calcd for  $[C_{22}H_{33}ClO_{10}+Na]^+$  515.1660, found 515.1662.

<sup>16</sup> Compound **26b-i** was involved in the transformation (**26b** to **28**), which is not represented in Scheme 5.

**2,3-Didehydro-4-O-isobutyral- $\alpha$ -L-rhamnopyranosyl-(1 $\rightarrow$ 4)-2-O-chloroacetyl-3-O-isobutyral- $\alpha$ -L rhamnopyranosyl trichloroacetimidate **28****

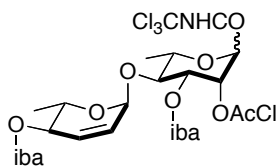

Glycosyl donor **26b-i** (50 mg, 0.10 mmol) was dissolved in 1.0 mL dry  $\text{CH}_2\text{Cl}_2$  and cooled to 0 °C. To this added  $\text{Cl}_3\text{CCN}$  (102  $\mu\text{L}$ , 1.04 mmol) and NaH (0.24 mg, 0.01 mmol). The reaction was stirred at 0 °C under argon for 3h. Upon consumption of starting material, reaction was directly loaded to a column (column diameter: 0.5 cm, packed with 2 cm celite and 3 cm silica gel). Elution with 5-10% EtOAc/hexane gave trichloroacetimidate **28** (56 mg, 88%) as a mixture of diastereomers (10:1,  $\alpha$ : $\beta$ ). Colorless oil:  $R_f$  (20% EtOAc/hexane) = 0.75;  $[\alpha]_D^{25} = -20.46$  ( $c$  0.05, benzene); IR (thin film,  $\text{cm}^{-1}$ )  $\nu$  3430, 3120, 2964, 1851, 1780, 1652, 1556, 1136, 1031, 864;  $^1\text{H}$  NMR for the major diastereomes ( $\text{C}_6\text{D}_6$ , 400 MHz):  $\delta$  0.99-1.03 (m, 9H),  $\delta$  1.07 (d,  $J = 6.4$  Hz, 3H),  $\delta$  1.18 (d,  $J = 6.0$  Hz, 3H),  $\delta$  1.44 (d,  $J = 5.6$  Hz, 3H),  $\delta$  2.29-2.37 (m, 2H),  $\delta$  3.25 (d,  $J = 14.8$  Hz, 1H),  $\delta$  3.35 (d,  $J = 14.8$  Hz, 1H),  $\delta$  4.07 (dq,  $J = 2.8, 5.6$  Hz, 1H),  $\delta$  4.14 (dd,  $J = 9.6, 9.6$  Hz, 1H),  $\delta$  4.29 (dq,  $J = 4.0, 5.6$  Hz, 1H),  $\delta$  5.27 (d,  $J = 8.8$  Hz, 1H),  $\delta$  5.41 (s, 1H),  $\delta$  5.63 (d,  $J = 10.4$  Hz, 1H),  $\delta$  5.71 (dd,  $J = 2.8, 10.0$  Hz, 1H),  $\delta$  5.79 (d,  $J = 10.4$  Hz, 1H),  $\delta$  5.85 (s, 1H),  $\delta$  6.39 (s, 1H),  $\delta$  8.47 (s, 1H);  $^{13}\text{C}$  NMR ( $\text{C}_6\text{D}_6$ , 100 MHz):  $\delta$  176.2, 175.7, 166.6, 160.3, 131.3, 127.5, 96.2, 95.6, 91.4, 76.2, 72.9, 71.2, 70.8, 70.3, 66.2, 40.5, 34.5, 19.3, 19.2, 19.1, 18.4, 18.0; HRMS (ESI): calcd for  $[\text{C}_{24}\text{H}_{33}\text{Cl}_4\text{NO}_{10} + \text{Na}]^+$  658.0756, found 658.0767.

**1-Benzyl-4-*O*-isobutyral- $\alpha$ -L-rhamnopyranosyl-(1 $\rightarrow$ 4)-2-*O*-chloroacetyl-3-*O*-isobutyral- $\alpha$ -L-rhamnopyranoside **26a-i**<sup>17</sup>**

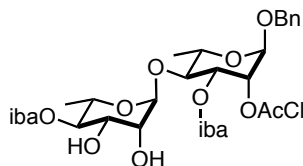

Alkene **26a** (1.65 g, 2.83 mmol) was dissolved in a 1:1 mixture of *t*-BuOH/acetone (6.00 mL) and the mixture was cooled to 0 °C. To this added a 50% (v/v) solution of NMO/H<sub>2</sub>O (6.00 mL). The reaction mixture was stirred at that temperature for 15 min and added OsO<sub>4</sub> (50 mg, 0.19 mmol). Stirred over night without replenishing ice from 0 °C to rt. Cooled the reaction to 0 °C, diluted with EtOAc and reduced the excess OsO<sub>4</sub> with saturated Na<sub>2</sub>SO<sub>3</sub>. The reaction mixture was then concentrated to remove acetone. The aqueous layer was extracted with EtOAc (50 mL x 3) and the combined organic layer was washed with saturated brine. Dried over Na<sub>2</sub>SO<sub>4</sub> and concentrated under reduced pressure. Silica gel chromatography with 35-40% EtOAc/hexane gave diol **26a-i** (1.47 g, 84%). White solid: *R<sub>f</sub>* (40% hexanes/EtOAc) = 0.25; mp: 140-144 °C;  $[\alpha]_D^{25} = -117.40$  (*c* 1.64, CH<sub>2</sub>Cl<sub>2</sub>); IR (thin film, cm<sup>-1</sup>)  $\nu$  3390, 3054, 2864, 1741, 1680, 1624, 1478, 1391, 1130, 1042, 987, 866; <sup>1</sup>H NMR (CDCl<sub>3</sub>, 400 MHz):  $\delta$  1.14-1.21 (m, 15H),  $\delta$  1.36 (d, *J* = 6.0 Hz, 3H),  $\delta$  2.51 (septet, *J* = 7.2 Hz, 1H),  $\delta$  2.60 (septet, *J* = 7.2 Hz, 1H),  $\delta$  2.79 (d, *J* = 2.4 Hz, 1H),  $\delta$  3.12 (d, *J* = 4.4 Hz, 1H),  $\delta$  3.73 (dd, *J* = 9.0, 9.2 Hz, 1H),  $\delta$  3.76-3.91 (m, 4H),  $\delta$  4.05 (d, *J* = 15.6 Hz, 1H),  $\delta$  4.13 (d, *J* = 15.6 Hz, 1H),  $\delta$  4.55 (d, *J* = 11.6 Hz, 1H),  $\delta$  4.72 (d, *J* = 11.6 Hz, 1H),  $\delta$  4.75 (dd, *J* = 9.2, 9.2 Hz, 1H),  $\delta$  4.77 (s, 1H),  $\delta$  5.02 (s, 1H),  $\delta$  5.31 (dd, *J* = 3.2, 9.2 Hz, 1H),  $\delta$  5.35 (s, 1H),  $\delta$  7.29 -7.33 (m, 5H); <sup>13</sup>C NMR (CDCl<sub>3</sub>, 100 MHz):  $\delta$  178.6, 176.0, 166.7, 136.6, 128.7, 128.3, 128.1, 101.3, 96.2, 78.3, 75.1, 71.9, 91.8, 71.2, 70.3, 69.5, 67.3, 66.7, 40.7, 34.3, 34.2, 19.2, 19.0, 18.9, 18.8, 18.2, 17.4; HRMS (ESI): calcd for [C<sub>29</sub>H<sub>41</sub>ClO<sub>12</sub> + Na]<sup>+</sup> 639.2150, found. 639.2169.

<sup>17</sup> Compound **26a-i** was involved in the transformation (**26a** to **27**), which is not represented in Scheme 5.

**1-Benzyl-4-*O*-isobutyral-2,3-*O*-isopropylidene- $\alpha$ -L-rhamnopyranosyl-(1 $\rightarrow$ 4)-2-*O*-chloroacetyl-3-*O*-isobutyral- $\alpha$ -L rhamnopyranoside **27****

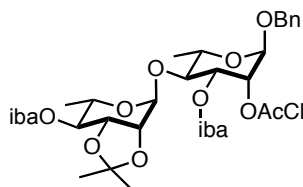

The *syn*-diol **26a-i** (700 mg, 1.13 mmol) was dissolved in dry CH<sub>2</sub>Cl<sub>2</sub> (3.00 mL) and the mixture was cooled to 0 °C. To this added 2,2-DMP (0.28 mL, 2.27 mmol) and *p*-TsOH (2.15 mg, 0.01 mmol). The reaction was stirred under argon from 0 °C to rt over 2h. Diluted with CH<sub>2</sub>Cl<sub>2</sub> and quenched by adding saturated NaHCO<sub>3</sub> at 0 °C. The aqueous layer was extracted with CH<sub>2</sub>Cl<sub>2</sub> (50 mL x 3) and the combined organic layer was washed with saturated brine. Dried over Na<sub>2</sub>SO<sub>4</sub> and concentrated under reduced pressure. The product **27** (683 mg, 92%) was obtained by silica gel chromatography using 10% EtOAc/Hexane. Colorless solid: *R*<sub>f</sub> (40% hexanes/EtOAc) = 0.25; mp: 132 °C; [α]<sub>D</sub><sup>25</sup> = -61.10 (*c* 1.05, CH<sub>2</sub>Cl<sub>2</sub>); IR (thin film, cm<sup>-1</sup>) ν 2943, 2864, 1864, 1740, 1663, 1624, 1456, 1147, 1042, 978; <sup>1</sup>H NMR (CDCl<sub>3</sub>, 500 MHz): δ 1.14 (d, *J* = 7.0 Hz, 3H), δ 1.14 (d, *J* = 6.2 Hz, 3H), δ 1.15 (d, *J* = 6.0 Hz, 3H), δ 1.17 (d, *J* = 6.0 Hz, 3H), δ 1.18 (d, *J* = 6.6 Hz, 3H), δ 1.26 (s, 3H), δ 1.33 (d, *J* = 6.8 Hz, 3H), δ 1.52 (s, 3H), δ 2.52 (septet, *J* = 7.0 Hz, 1H), δ 2.57 (septet, *J* = 7.2 Hz, 1H), δ 3.73-3.87 (m, 3H), δ 3.99 (d, *J* = 3.2 Hz, 1H), δ 4.05-4.11 (m, 3H), δ 4.52 (d, *J* = 12.0 Hz, 1H), δ 4.71 (d, *J* = 12.0 Hz, 1H), δ 4.78 (d, *J* = 1.0 Hz, 1H), δ 4.83 (dd, *J* = 8.0, 9.0 Hz, 1H), δ 5.19 (s, 1H), δ 5.34-5.36 (m, 2H), δ 7.28-7.33 (m, 5H); <sup>13</sup>C NMR (CDCl<sub>3</sub>, 100 MHz): δ 176.2, 176.0, 166.6, 136.7, 128.7, 128.2, 128.1, 109.7, 99.2, 96.3, 77.8, 76.3, 75.7, 73.8, 72.1, 71.9, 69.6, 67.3, 65.1, 40.7, 34.2, 27.7, 26.5, 19.2, 19.0, 18.9, 18.8, 17.9, 16.7; HRMS (ESI): calcd for [C<sub>32</sub>H<sub>45</sub>ClO<sub>12</sub> + Na]<sup>+</sup> 679.2507, found 679.2521.

**4-*O*-Isobutyral-2,3-*O*-isopropylidene- $\alpha$ -L-rhamnopyranosyl-(1 $\rightarrow$ 4)-2-*O*-chloroacetyl-3-*O*-isobutyral- $\alpha$ -L rhamnopyranoside **27a**<sup>18</sup>**

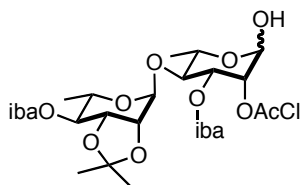

Benzyl ether **27** (800 mg, 1.22 mmol) was dissolved in EtOAc (10 mL) and few drops of MeOH. To this solution, Pd/C (60 mg) was added and under H<sub>2</sub> balloon pressure the reaction was stirred for 3h at rt. The solid Pd/C catalyst was removed by filtration using a celite pad. Filtrate was concentrated under reduced pressure and purified by silica gel chromatography using 30-35% EtOAc/hexane to obtain **27a** (650 mg, 94%) as a mixture of diastereomers (10:1,  $\alpha$ : $\beta$ ). White solid:  $R_f$  (30% hexanes/EtOAc) = 0.31; mp: 164 °C;  $[\alpha]_D^{25} = -22.80$  ( $c$  0.50, CH<sub>2</sub>Cl<sub>2</sub>); IR (thin film, cm<sup>-1</sup>)  $\nu$  3360, 2985, 2833, 1851, 1741, 1663, 1456, 1147, 1040, 866; <sup>1</sup>H NMR of the major diastereomer in (CDCl<sub>3</sub>, 400 MHz):  $\delta$  1.11-1.80 (m, 15H),  $\delta$  1.26 (s, 3H),  $\delta$  1.33 (d,  $J$  = 6.6 Hz, 3H),  $\delta$  1.51 (s, 3H),  $\delta$  2.48-2.62 (m, 2H),  $\delta$  3.73-3.87 (m, 3H),  $\delta$  3.99-3.4.17 (m, 5H),  $\delta$  4.82 (dd,  $J$  = 8.8, 8.8 Hz, 1H),  $\delta$  5.12 (s, 1H),  $\delta$  5.19 (s, 1H),  $\delta$  5.32-5.36 (m, 2H); <sup>13</sup>C NMR (CDCl<sub>3</sub>, 100 MHz):  $\delta$  176.5, 176.3, 109.8, 99.1, 91.8, 77.8, 76.3, 75.7, 73.9, 72.3, 71.8, 67.1, 65.1, 40.8, 34.2, 27.8, 26.5 19.2, 19.0, 18.9, 18.8, 18.1, 16.7; HRMS (ESI): calcd for [C<sub>25</sub>H<sub>39</sub>ClO<sub>12</sub> + Na]<sup>+</sup> 589.2008, found 589.2028.

<sup>18</sup> Compound **27a** was involved in the transformation (**27** to **3**), which is not represented in Scheme 5.

**4-*O*-Isobutyral-2,3-*O*-isopropylidene- $\alpha$ -L-rhamnopyranosyl-(1 $\rightarrow$ 4)-2-*O*-chloroacetyl-3-*O*-isobutyral- $\alpha$ -L rhamnopyranosyl trichloroacetimidate **3****

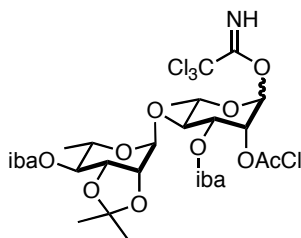

Anomeric alcohol **27a** (64 mg, 0.11 mmol) was dissolved in 1.10 mL dry  $\text{CH}_2\text{Cl}_2$  and cooled to 0 °C. To this added  $\text{CNCCl}_3$  (113  $\mu\text{L}$ , 1.13 mmol) and NaH (0.3 mg, 0.01 mmol). The reaction was stirred at 0 °C under argon for 3h. Upon consumption of starting material, reaction was directly loaded to a column (column diameter: 0.50 cm, packed with 3.00 cm silica gel topped with a 2.00 cm celite pad). Elution with 10-15% EtOAc/hexane gave trichloroacetimidate **3** (55 mg, 70%) as a mixture of diastereomers (12:1,  $\alpha$ : $\beta$ ). Colorless oil:  $R_f$  (20% EtOAc/hexane) = 0.50;  $[\alpha]_D^{25} = -224.80$  ( $c$  0.50, benzene); IR (thin film,  $\text{cm}^{-1}$ )  $\nu$  3415, 3206, 2837, 1846, 1781, 1652, 1523, 1158, 866;  $^1\text{H}$  NMR for the major diastereomes ( $\text{C}_6\text{D}_6$ , 400 MHz):  $\delta$  1.03-1.13 (m, 15H)  $\delta$  1.17 (d,  $J = 6.0$  Hz, 3H),  $\delta$  1.39 (d,  $J = 6.6$  Hz, 3H),  $\delta$  1.55 (s, 3H),  $\delta$  2.39 (septet,  $J = 6.8$  Hz, 1H),  $\delta$  2.47 (septet,  $J = 7.6$  Hz, 1H),  $\delta$  3.27 (d,  $J = 14.8$  Hz, 1H),  $\delta$  3.26 (d,  $J = 14.8$  Hz, 1H),  $\delta$  3.84 (dq,  $J = 6.6, 9.4$  Hz, 1H),  $\delta$  4.04-4.14 (m, 3H),  $\delta$  4.29 (dq,  $J = 6.4, 9.2$  Hz, 1H),  $\delta$  5.27 (dd,  $J = 9.6, 10.4$  Hz, 1H),  $\delta$  5.53 (s, 1H),  $\delta$  5.73 (dd,  $J = 2.8, 10.4$  Hz, 1H),  $\delta$  5.84 (s, 1H),  $\delta$  6.40 (s, 1H),  $\delta$  8.51 (s, 1H);  $^{13}\text{C}$  NMR ( $\text{CDCl}_3$ , 100 MHz):  $\delta$  176.0, 166.5, 160.2, 110.2, 100.2, 95.5, 91.4, 77.7, 77.0, 76.5, 74.4, 72.7, 70.9, 70.2, 65.9, 40.5, 43.6, 34.5, 28.2, 26.9, 19.4, 19.3, 19.2, 19.1, 18.6, 17.1; HRMS (ESI): calcd for  $[\text{C}_{27}\text{H}_{39}\text{Cl}_4\text{NO}_{12} + \text{Na}]^+$  732.1124, found 732.1118.

## Tetrasaccharide 2

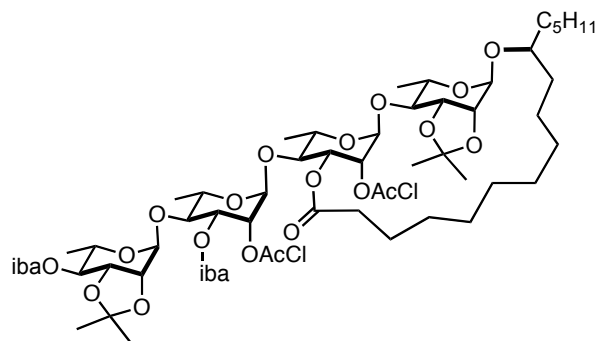

Glycosyl acceptor **9** (45 mg, 0.07 mmol) and glycosyl donor **3** (91 mg, 0.13 mmol) were separately dried azeotropically with benzene and under high vacuum for 3h. Acceptor **9** was dissolved in dry CH<sub>2</sub>Cl<sub>2</sub> (1.00 mL) and transferred to the flask containing the donor **3** via cannula. Freshly activated molecular sieves (60 mg) was added and stirred under argon for 15 min. The reaction mixture was then cooled to  $-78\text{ }^{\circ}\text{C}$  and dropwise added a CH<sub>2</sub>Cl<sub>2</sub> solution of TMSOTf (2.80 mL, 0.02 mmol in 0.3 mL CH<sub>2</sub>Cl<sub>2</sub>). The reaction was stirred from  $-78\text{ }^{\circ}\text{C}$  to  $0\text{ }^{\circ}\text{C}$  over 1.50 h and subsequently quenched with Et<sub>3</sub>N. Water was added and the aqueous phase extracted with CH<sub>2</sub>Cl<sub>2</sub> (20 mL x 3). The combined organic layer was washed with 1N HCl, saturated NaHCO<sub>3</sub> and brine. The pooled organic layer was dried over Na<sub>2</sub>SO<sub>4</sub> and concentrated under reduced pressure. Silica gel chromatography with 10-12% EtOAc/hexane gave tetrasaccharide **2** (60 mg, 71%). Colorless oil:  $R_f$  (20% EtOAc/hexane) = 0.5;  $[\alpha]_D^{25} = -26.34$  ( $c$  2.4, CH<sub>2</sub>Cl<sub>2</sub>); IR (thin film, cm<sup>-1</sup>)  $\nu$  2864, 1781, 1740, 1680, 1666, 1485, 1213, 1156, 1036, 1023, 948, 866, 788; <sup>1</sup>H NMR (CDCl<sub>3</sub>, 400 MHz):  $\delta$  0.87 (t,  $J = 6.6$  Hz, 3H),  $\delta$  1.12-1.14 (m, 9H),  $\delta$  1.17 (d,  $J = 7.2$  Hz, 3H),  $\delta$  1.19 (d,  $J = 6.4$  Hz, 3H),  $\delta$  1.25-1.36 (m, 34H),  $\delta$  1.47 (s, 3H),  $\delta$  1.52 (s, 3H),  $\delta$  1.54-1.61 (m, 3H),  $\delta$  1.70 (m, 2H),  $\delta$  2.21 (ddd,  $J = 4.2, 7.2, 14.2$  Hz, 1H),  $\delta$  2.39 (ddd,  $J = 4.4, 7.0, 14.2$  Hz, 1H),  $\delta$  2.47-2.61 (m, 2H),  $\delta$  3.45 (brs, 1H),  $\delta$  3.49 (dd,  $J = 5.2, 7.2$  Hz, 1H),  $\delta$  3.69 (dd,  $J = 9.6, 9.6$  Hz, 1H),  $\delta$  3.74-3.79 (m, 2H),  $\delta$  3.89-3.95 (m, 2H),  $\delta$  3.98-4.04 (m, 2H),  $\delta$  4.08 (m, 4H),  $\delta$  4.12 (s, 2H),  $\delta$  4.22 (dd,  $J = 5.2, 6.0$  Hz, 1H),  $\delta$  4.83 (dd,  $J = 8.8, 8.8$  Hz, 1H),  $\delta$  4.91 (s, 1H),  $\delta$  4.94 (s, 1H),  $\delta$  5.13 (s, 1H),  $\delta$  5.15 (brs, 1H),  $\delta$  5.18 (s, 1H),  $\delta$  5.25 (dd,  $J = 3.2, 9.6$  Hz, 1H),  $\delta$  5.32 (brs, 1H),  $\delta$  5.45 (dd,  $J = 2.8, 10.4$  Hz, 1H); <sup>13</sup>C NMR (CDCl<sub>3</sub>, 100 MHz):  $\delta$  176.3, 175.8, 173.4, 166.5, 166.4, 110.1, 109.8, 99.1, 98.9, 96.4, 95.8, 80.3, 80.2, 78.7, 77.6, 76.8, 76.3, 75.8, 74.4, 73.9, 73.3, 72.2, 71.5, 71.4, 68.5, 68.1, 65.8, 65.2, 40.9, 40.7, 34.6, 34.2, 34.1, 33.1, 32.3, 30.1, 29.9, 28.6, 27.9, 27.8, 27.7, 27.6, 26.6, 26.4, 26.1, 25.1, 22.8,

19.5, 19.2, 19.0, 18.8, 18.3, 17.9, 16.7, 14.3; HRMS (ESI): calcd for  $[C_{58}H_{92}Cl_2O_{22} + H]^+$  1211.5536, found 1211.5562.

### Macrocyclic tetraol **29**

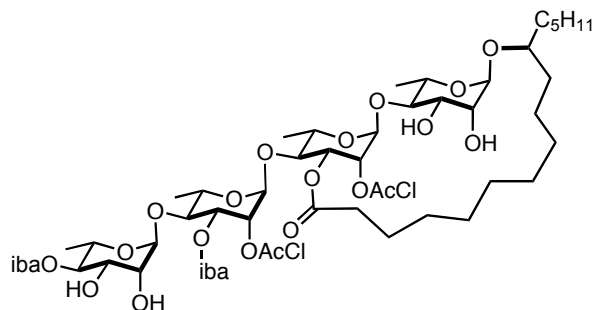

The bis-acetonide protected tetrasaccharide **2** (35 mg, 0.029 mmol) was dissolved in 0.40 mL of  $CH_2Cl_2$  and cooled to 0 °C. The reaction mixture was stirred for 10 min at this temperature and dropwise added 60  $\mu$ L aqueous solution TFA (10:1). The reaction mixture was stirred at 0 °C for 30 min and quenched with saturated  $NaHCO_3$ . Water was added and the aqueous phase extracted with  $CH_2Cl_2$  (20 mL x 3). The combined organic layer was washed with brine and dried over  $Na_2SO_4$  and concentrated under reduced pressure. Silica gel chromatography with 35-40% EtOAc/hexane gave **29** (23.50 mg, 72%). Colorless oil;  $R_f$  (40% EtOAc/hexane) = 0.32;  $[\alpha]_D^{25} = -54.3$  (*c* 0.4,  $CH_2Cl_2$ ); IR (thin film,  $cm^{-1}$ )  $\nu$  3350, 3300, 2912, 1764, 1741, 1684, 1536, 1491, 1216, 1026, 951, 866;  $^1H$  NMR ( $CDCl_3$ , 500 MHz):  $\delta$  0.89 (t,  $J = 7.0$  Hz, 3H),  $\delta$  1.14 (d,  $J = 7.0$  Hz, 3H),  $\delta$  1.15 (d,  $J = 7.0$  Hz, 3H),  $\delta$  1.89 (d,  $J = 7.0$  Hz, 3H),  $\delta$  1.20 (d,  $J = 6.5$ , 3H),  $\delta$  1.21 (d,  $J = 6.5$  Hz, 3H),  $\delta$  1.25-1.33 (m, 22H),  $\delta$  1.35 (d,  $J = 6.5$  Hz, 3H),  $\delta$  1.36 (d,  $J = 6.0$  Hz, 3H),  $\delta$  1.45-1.54 (m, 5H),  $\delta$  2.43 (ddd,  $J = 2.5, 8.0, 16.5$  Hz, 1H),  $\delta$  2.34 (ddd,  $J = 3.0, 9.0, 16.7$  Hz, 1H),  $\delta$  2.44 (d,  $J = 5.5$  Hz, 1H),  $\delta$  2.51 (septet,  $J = 7.0$  Hz, 1H),  $\delta$  2.61 (septet,  $J = 6.5$  Hz, 1H),  $\delta$  2.68 (s, 1H),  $\delta$  2.86 (d,  $J = 8.0$  Hz, 1H),  $\delta$  3.10 (d,  $J = 4.5$  Hz, 1H),  $\delta$  3.42 (dd,  $J = 9.0, 9.0$  Hz, 1H),  $\delta$  3.47 (m, 1H),  $\delta$  3.68 (dd,  $J = 9.5, 9.5$  Hz, 1H),  $\delta$  3.75-3.79 (m, 4H),  $\delta$  3.85-3.99 (m, 5H),  $\delta$  4.09 (s, 2H),  $\delta$  4.11 (s, 2H),  $\delta$  4.75 (dd,  $J = 9.5, 9.5$  Hz, 1H),  $\delta$  4.82 (d,  $J = 2.0$  Hz, 1H),  $\delta$  4.92 (d,  $J = 1.5$  Hz, 1H),  $\delta$  5.0 (s, 1H),  $\delta$  5.18 (dd,  $J = 2.5, 2.5$  Hz, 1H),  $\delta$  5.22 (dd,  $J = 3.0, 9.5$  Hz, 1H),  $\delta$  5.24 (d,  $J = 2.0$  Hz, 1H),  $\delta$  5.41 (dd,  $J = 3.0, 10.5$  Hz, 1H),  $\delta$  5.53 (dd,  $J = 2.0, 2.6$  Hz, 1H);  $^{13}C$  NMR ( $CDCl_3$ , 100 MHz):  $\delta$  178.7, 175.8, 173.9, 167.0, 166.5, 101.2, 99.0, 98.9, 97.2, 82.1, 81.2, 78.7, 78.1, 75.3, 73.4, 72.2, 72.1, 72.0, 71.4, 71.3, 71.1, 70.4, 68.5, 68.1, 66.8, 66.7,



41.0, 40.7, 34.3, 34.2, 33.7, 33.1, 32.3, 30.3, 29.9, 28.6, 27.7, 27.6, 26.6, 25.6, 25.2, 22.8, 22.6, 19.2, 10.0, 18.8, 18.5, 18.4, 18.1, 17.4, 14.2; HRMS (ESI): calcd for  $[C_{52}H_{84}Cl_2O_{22} + Na]^+$  1153.4724, found 1153.4744.

### Merremoside D (1)

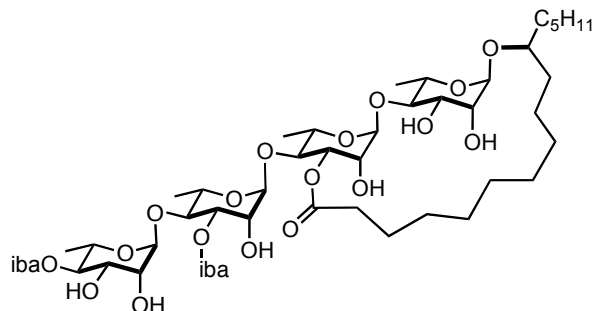

The bis-chloroacetate **29** (23.5 mg, 0.02 mmol) was dissolved in THF (1.0 mL). To this added thiourea (19.0 mg, 0.25 mmol),  $NaHCO_3$  (11.0 mg, 0.13 mmol) and TBAI (4.0 mg, 0.01 mmol). The reaction mixture was then refluxed at 55 °C under argon for 3h. Upon consumption of starting material, the reaction was cooled 0 °C and diluted with EtOAc and  $H_2O$ . The aqueous phase extracted with EtOAc (10 mL x 3) and combined organic layer was washed with water (7-10 times to remove thiourea and TBAI) and saturated brine. Dried over  $Na_2SO_4$  and concentrated under reduced pressure. Silica gel chromatography with 5% MeOH/ $CHCl_3$  gave merremoside D (**1**), (16 mg, 78%). White solid, mp: 140 °C, (ref<sup>19</sup> mp: 138-139 °C);  $R_f$  (5% MeOH/ $CHCl_3$ ) = 0.3;  $[\alpha]_D^{25} = -68.6$  (*c* 0.83, MeOH), (ref<sup>19</sup>:  $[\alpha]_D = -77$  (*c* 1.1, MeOH)) IR (thin film,  $cm^{-1}$ )  $\nu$  3330, 3300, 2910, 2850, 1741, 1730, 1864, 1514, 1236, 1026, 941, 866; HRMS (ESI): calcd for  $[C_{48}H_{82}O_{20} + H]^+$  979.5478, found 979.5457.

$^1H$  and  $^{13}C$  NMR spectrums were recorded in  $CDCl_3$ , Pyridine- $d_5$  and Pyridine- $d_5 + D_2O$ . Due to instability of the compound in Pyridine- $d_5 + D_2O$ , full NMR assignments were carried out in  $CDCl_3$  and Pyridine- $d_5$ .<sup>20</sup> The analyses are listed in following table for both solvents.

#### Stability of merremoside D (1) in different solvents ( $^1H$ NMR, 600 MHz)

<sup>19</sup> I. Kitagawa, N. I. Baek, K. Kawashima, Y. Yokokawa, M. Yoshikawa, K. Ohashi, H. Shibuya, *Chem. Pharm. Bull.* **1996**, *44*, 1680

<sup>20</sup> See comparison of  $^1H$  NMR of merremoside D (**1**) in different solvents.

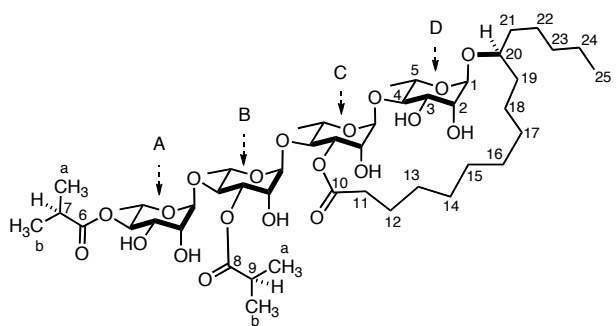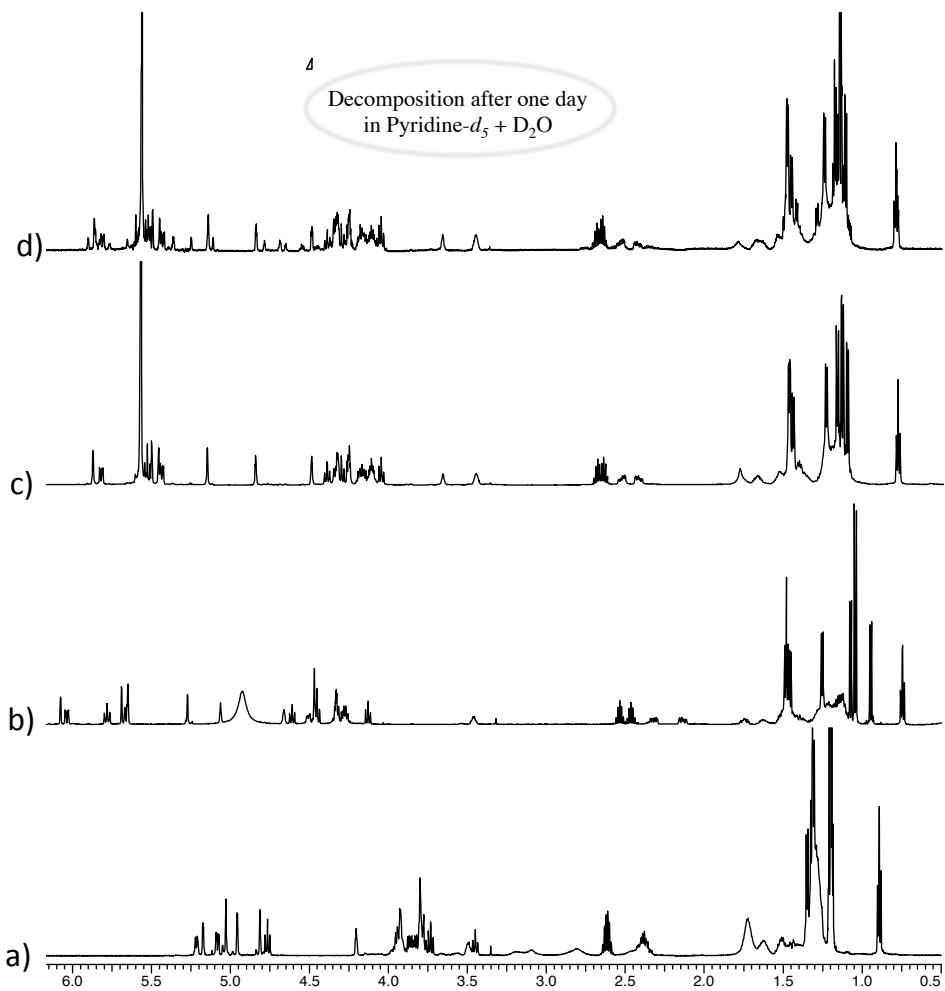

a)  $\text{CDCl}_3$ , b)  $\text{Pyridine-}d_5$ , c)  $\text{Pyridine-}d_5 + \text{D}_2\text{O}$  (5:1), d) Merremoside D (**1**) decomposed in  $\text{Pyridine-}d_5 + \text{D}_2\text{O}$  (5:1) after one day.

Complete  $^1\text{H}$  NMR assignments in  $\text{CDCl}_3$  (600 MHz)

| Position                             | $\delta/\text{ppm}$ | J/Hz               |
|--------------------------------------|---------------------|--------------------|
| 25- $\text{CH}_3$                    | 0.890               | t, $J = 7.2$       |
| 5- $\text{CH}_3^{\text{b}}$ -sugar A | 1.189               | d, $J = 6.2$       |
| 7- $\text{CH}_3^{\text{a}}$ -iba     | 1.196               | d, $J = 7.0$       |
| 7- $\text{CH}_3^{\text{b}}$ -iba     | 1.197               | d, $J = 7.0$       |
| 9- $\text{CH}_3^{\text{a}}$ -iba     | 1.204               | d, $J = 7.0$       |
| 9- $\text{CH}_3$ -iba                | 1.206               | d, $J = 7.0$       |
| 12-19, 21-24- $\text{CH}_2$ 's       | 1.24-1.77           | m                  |
| 5- $\text{CH}_3$ -sugar D            | 1.308               | d, $J = 6.4$       |
| 5- $\text{CH}_3$ -sugar B            | 1.322               | d, $J = 6.4$       |
| 5- $\text{CH}_3$ -sugar C            | 1.349               | d, $J = 6.3$       |
| 11- $\text{CH}_2$                    | 2.33-2.43           | m                  |
| 9-H                                  | 2.61                | septet, $J = 7.0$  |
| 7-H                                  | 2.62                | septet, $J = 7.0$  |
| 6 x OH                               | 2.56-3.45           | m                  |
| 4-H-sugar D                          | 3.447               | dd, $J = 9.1, 9.1$ |
| 20-H                                 | 3.47-3.51           | m                  |
| 4-H-sugar B                          | 3.730               | dd, $J = 8.5, 9.1$ |
| 4-H-sugar C                          | 3.774               | dd, $J = 8.3, 8.8$ |
| 3-H-sugar A                          | 3.788               | dd, $J = 2.6, 9.3$ |
| 2-H-sugar D                          | 3.797               | dd, $J = 2.0, 2.8$ |
| 2-H-sugar A                          | 3.799               | dd, $J = 1.6, 2.6$ |
| 5-H-sugar B                          | 3.830               | dq, $J = 6.4, 9.1$ |
| 5-H-sugar A                          | 3.863               | dq, $J = 6.2, 9.5$ |
| 2-H-sugar B                          | 3.925               | dd, $J = 2.5, 3.1$ |
| 5-H-sugar D                          | 3.930               | dq, $J = 6.4, 9.1$ |
| 5-H-sugar C                          | 3.939               | dq, $J = 6.3, 8.8$ |
| 3-H-sugar D                          | 3.940               | dd, $J = 2.8, 9.1$ |
| 2-H-sugar C                          | 4.200               | dd, $J = 2.5, 2.9$ |
| 4-H-sugar A                          | 4.762               | dd, $J = 9.3, 9.5$ |
| 1-H-sugar D                          | 4.811               | d, $J = 2.0$       |
| 1-H-sugar B                          | 4.955               | d, $J = 2.5$       |
| 1-H-sugar A                          | 5.026               | d, $J = 1.6$       |
| 3-H-sugar B                          | 5.080               | dd, $J = 3.1, 8.5$ |
| 1-H-sugar C                          | 5.171               | d, $J = 2.9$       |
| 3-H-sugar C                          | 5.214               | dd, $J = 2.5, 8.3$ |

Complete  $^{13}\text{C}$  NMR assignments in  $\text{CDCl}_3$  (150 MHz)

| Position                        | $\delta/\text{ppm}$                                        |
|---------------------------------|------------------------------------------------------------|
| C-6, C=O-iba                    | 178.32                                                     |
| C-8, C=O-iba                    | 176.11                                                     |
| C-10, C=O-macrolactone          | 173.97                                                     |
| C-1, sugar A                    | 100.51                                                     |
| C-1, sugar B                    | 100.33                                                     |
| C-1, sugar C                    | 98.64                                                      |
| C-1, sugar D                    | 98.51                                                      |
| C-4, sugar D                    | 81.43                                                      |
| C-20                            | 80.91                                                      |
| C-4, sugar B                    | 78.14                                                      |
| C-4, sugar C                    | 77.71                                                      |
| C-4, sugar A                    | 74.99                                                      |
| C-3, sugar C                    | 74.48                                                      |
| C-3, sugar B                    | 73.67                                                      |
| C-2, sugar A                    | 71.34                                                      |
| C-3, sugar D                    | 71.33                                                      |
| C-2, sugar D                    | 71.02                                                      |
| C-2, sugar C                    | 70.31                                                      |
| C-3, sugar A                    | 70.13                                                      |
| C-2, sugar B                    | 69.65                                                      |
| C-5, sugar C                    | 68.39                                                      |
| C-5, sugar B                    | 67.67                                                      |
| C-5, sugar A                    | 66.51                                                      |
| C-5, sugar D                    | 66.35                                                      |
| C-7, C-9                        | 34.11, 34.09                                               |
| C-11                            | 33.90                                                      |
| C-23                            | 32.01                                                      |
| C-13                            | 27.30                                                      |
| C-12                            | 23.53                                                      |
| C-24                            | 22.58                                                      |
| C-14 to C-19, }<br>C-21, C-22 } | { 33.89, 33.43, 29.66, 28.65<br>27.97, 27.73, 24.97, 24.91 |
| 4 x $\text{CH}_3$ -iba          | 19.04, 18.96, 18.77, 18.73                                 |
| $\text{CH}_3$ , sugar C         | 18.39                                                      |
| $\text{CH}_3$ , sugar D         | 18.10                                                      |
| $\text{CH}_3$ , sugar B         | 18.04                                                      |
| $\text{CH}_3$ , sugar A         | 17.16                                                      |
| C-25                            | 14.01                                                      |

## Complete $^1\text{H}$ NMR assignments in Pyridine- $d_5$ (600 MHz)

| Position                            | $\delta/\text{ppm}$ | J/Hz                      |
|-------------------------------------|---------------------|---------------------------|
| 25-CH <sub>3</sub>                  | 0.86                | t, $J = 7.3$              |
| 9-CH <sub>3</sub> <sup>a</sup> -iba | 1.06                | d, $J = 7.0$              |
| 7-CH <sub>3</sub> <sup>a</sup> -iba | 1.15                | d, $J = 7.0$              |
| 9-CH <sub>3</sub> <sup>b</sup> -iba | 1.16                | d, $J = 7.0$              |
| 7-CH <sub>3</sub> <sup>b</sup> -iba | 1.18                | d, $J = 7.0$              |
| 13-19, 21-24-CH <sub>2</sub> 's     | 1.20-1.65           | m                         |
| 5-CH <sub>3</sub> -sugar A          | 1.36                | d, $J = 6.3$              |
| 5-CH <sub>3</sub> -sugar C          | 1.56                | d, $J = 6.2$              |
| 5-CH <sub>3</sub> -sugar D          | 1.58                | d, $J = 6.4$              |
| 5-CH <sub>3</sub> -sugar B          | 1.59                | d, $J = 6.4$              |
| 12-H <sup>a</sup>                   | 1.68-1.77           | m                         |
| 12-H <sup>b</sup>                   | 1.82-1.88           | m                         |
| 11-H <sup>a</sup>                   | 2.23                | ddd, $J = 16.0, 9.5, 3.1$ |
| 11-H <sup>b</sup>                   | 2.41                | ddd, $J = 16.0, 8.0, 3.1$ |
| 20-H                                | 3.51-3.55           | m                         |
| 9-H                                 | 2.56                | septet, $J = 7.0$         |
| 7-H                                 | 2.62                | septet, $J = 7.0$         |
| 4-H-sugar D                         | 4.18                | dd, $J = 8.6, 8.6$        |
| 5-H-sugar B                         | 4.327               | dq, $J = 6.4, 9.5$        |
| 5-H-sugar A                         | 4.333               | dq, $J = 6.3, 9.5$        |
| 2-H-sugar D                         | 4.37                | dd, $J = 2.0, 3.3$        |
| 5-H-sugar D                         | 4.38                | dq, $J = 6.4, 8.6$        |
| 5-H-sugar C                         | 4.39                | dq, $J = 6.2, 9.5$        |
| 4-H-sugar B                         | 4.49                | dd, $J = 9.1, 9.5$        |
| 2-H-sugar A                         | 4.50                | dd, $J = 1.8, 2.7$        |
| 3-H-sugar A                         | 4.51                | dd, $J = 2.7, 9.1$        |
| 3-H-sugar D                         | 4.56                | dd, $J = 3.3, 8.6$        |
| 4-H-sugar C                         | 4.66                | dd, $J = 9.5, 9.8$        |
| 2-H-sugar B                         | 4.71                | dd, $J = 1.8, 3.2$        |
| 2-H-sugar C                         | 5.11                | dd, $J = 2.2, 2.5$        |
| 1-H-sugar D                         | 5.31                | d, $J = 2.0$              |
| 1-H-sugar B                         | 5.68                | d, $J = 1.8$              |
| 3-H-sugar B                         | 5.69                | dd, $J = 3.2, 9.1$        |
| 1-H-sugar A                         | 5.72                | d, $J = 1.8$              |
| 4-H-sugar A                         | 5.81                | dd, $J = 9.5, 9.5$        |
| 3-H-sugar C                         | 6.06                | dd, $J = 2.5, 9.8$        |
| 1-H-sugar C                         | 6.10                | d, $J = 2.2$              |

## Complete $^{13}\text{C}$ NMR assignments in Pyridine- $d_5$ (150 MHz)

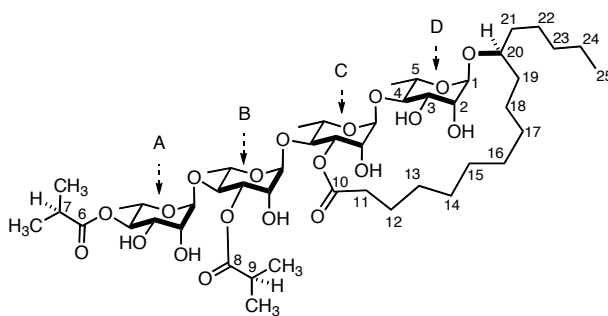

| Position                                                            | $\delta/\text{ppm}$                                                                                   |
|---------------------------------------------------------------------|-------------------------------------------------------------------------------------------------------|
| C-6, C=O-iba                                                        | 176.73                                                                                                |
| C-8, C=O-iba                                                        | 176.38                                                                                                |
| C-10, C=O-macrolactone                                              | 173.77                                                                                                |
| C-1, sugar A                                                        | 103.30                                                                                                |
| C-1, sugar B                                                        | 103.01                                                                                                |
| C-1, sugar C                                                        | 101.79                                                                                                |
| C-1, sugar D                                                        | 100.24                                                                                                |
| C-4, sugar D                                                        | 82.43                                                                                                 |
| C-20                                                                | 79.28                                                                                                 |
| C-4, sugar C                                                        | 77.96                                                                                                 |
| C-3, sugar C                                                        | 76.22                                                                                                 |
| C-3, sugar B                                                        | 75.75                                                                                                 |
| C-4, sugar A                                                        | 74.95                                                                                                 |
| C-4, sugar B                                                        | 74.96                                                                                                 |
| C-3, sugar D                                                        | 73.00                                                                                                 |
| C-2, sugar A                                                        | 72.71                                                                                                 |
| C-2, sugar B                                                        | 72.70                                                                                                 |
| C-3, sugar A                                                        | 71.59                                                                                                 |
| C-2, sugar C                                                        | 71.60                                                                                                 |
| C-2, sugar D                                                        | 70.15                                                                                                 |
| C-5, sugar C                                                        | 69.45                                                                                                 |
| C-5, sugar B                                                        | 68.74                                                                                                 |
| C-5, sugar A                                                        | 68.25                                                                                                 |
| C-5, sugar D                                                        | 68.17                                                                                                 |
| C-11                                                                | 33.72                                                                                                 |
| C-23                                                                | 32.41                                                                                                 |
| C-13                                                                | 27.18                                                                                                 |
| C-12                                                                | 23.30                                                                                                 |
| C-24                                                                | 22.95                                                                                                 |
| C-14 to C-19, C-21, C-22, }<br>C-7, C-9, 4 x CH <sub>3</sub> -iba } | { 34.96, 34.51, 34.47, 34.46, 30.46, 29.05, 28.08,<br>20.05, 26.28, 25.35, 19.37, 19.12, 19.11, 18.99 |
| CH <sub>3</sub> , sugar C                                           | 19.13                                                                                                 |
| CH <sub>3</sub> , sugar D                                           | 19.07                                                                                                 |
| CH <sub>3</sub> , sugar B                                           | 18.79                                                                                                 |
| CH <sub>3</sub> , sugar A                                           | 17.90                                                                                                 |
| C-25                                                                | 14.28                                                                                                 |

**Comparison of limited reported  $^1\text{H}$  chemical shifts and coupling constants with our NMR analysis in Pyridine- $d_5$ + $\text{D}_2\text{O}$  (5:1):**

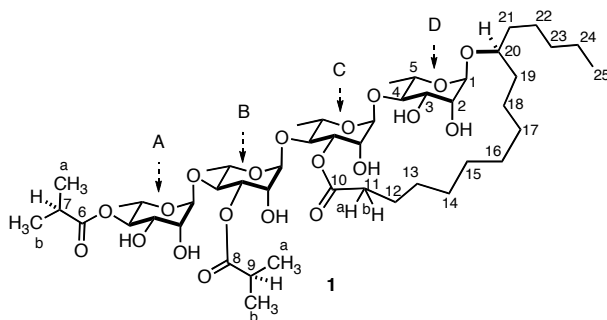

| Position                          | Natural <b>1</b> <sup>i</sup>      | Synthetic <b>1</b> <sup>ii</sup>   | $\Delta^{\text{iii}} = \mathbf{1}_{\text{nat}} - \mathbf{1}_{\text{syn}}$ |
|-----------------------------------|------------------------------------|------------------------------------|---------------------------------------------------------------------------|
| 25-CH <sub>3</sub>                | 0.79 (t, $J = 7.0$ )               | 0.79, (t, $J = 7.3$ )              | 0.00                                                                      |
| CH <sub>3</sub> <sup>b</sup> -iba | 1.18 (d, $J = 7.0$ )               | 1.11, (d, $J = 7.0$ )              | 0.07                                                                      |
| CH <sub>3</sub> <sup>a</sup> -iba | 1.19 (d, $J = 7.0$ )               | 1.14, (d, $J = 7.0$ )              | 0.05                                                                      |
| CH <sub>3</sub> <sup>b</sup> -iba | 1.20 (d, $J = 7.0$ )               | 1.15, (d, $J = 7.0$ )              | 0.05                                                                      |
| CH <sub>3</sub> <sup>a</sup> -iba | 1.23 (d, $J = 7.0$ )               | 1.17, (d, $J = 7.0$ )              | 0.06                                                                      |
| 5-CH <sub>3</sub> -sugar D        | 1.32 (d, $J = 6.1$ )               | 1.24, (d, $J = 6.2$ )              | 0.08                                                                      |
| 5-CH <sub>3</sub> -sugar C        | 1.50, (d, $J = 6.4$ )              | 1.45, (d, $J = 6.2$ )              | 0.05                                                                      |
| 5-CH <sub>3</sub> -sugar B        | 1.56, (d, $J = 6.1$ )              | 1.48, (d, $J = 6.1$ )              | 0.07                                                                      |
| 5-CH <sub>3</sub> -sugar A        | 1.57, (d, $J = 6.1$ )              | 1.49, (d, $J = 6.2$ )              | 0.08                                                                      |
| 11-H <sup>a</sup>                 | 2.16, (ddd, $J = 14.6, 6.9, 3.0$ ) | 2.43, (ddd, $J = 15.8, 8.9, 3.2$ ) | -0.27                                                                     |
| 11-H <sup>b</sup>                 | 2.41, (ddd, $J = 14.6, 6.9, 3.0$ ) | 2.54, (ddd, $J = 15.8, 8.9, 3.2$ ) | -0.13                                                                     |
| 9-H                               | 2.66, (m)                          | 2.65, (septet, $J = 7.0$ )         | 0.01                                                                      |
| 7-H                               | 2.67, (m)                          | 2.69, (septet, $J = 7.0$ )         | -0.02                                                                     |
| 20-H                              | 3.87, (m)                          | 3.43-3.48, (m)                     | 0.41                                                                      |
| 1-H-sugar D                       | 5.33, (brs)                        | 5.51, (d, $J = 1.7$ )              | -0.18                                                                     |
| 1-H-sugar A                       | 5.60, (brs)                        | 5.47, (d, $J = 1.7$ )              | 0.13                                                                      |
| 3-H-sugar C                       | 5.61, (dd, $J = 3.0, 9.5$ )        | 5.45, (dd, $J = 2.7, 9.4$ )        | 0.16                                                                      |
| 3-H-sugar B                       | 5.65, (dd, $J = 3.0, 9.5$ )        | 5.83, (dd, $J = 2.8, 10.0$ )       | -0.18                                                                     |
| 4-H-sugar A                       | 5.67, (dd, $J = 9.5, 9.5$ )        | 5.54, (dd, $J = 9.8, 9.8$ )        | 0.13                                                                      |
| 1-H-sugar B                       | 5.80, (brs)                        | 5.51, (d, $J = 1.6$ )              | 0.29                                                                      |
| 1-H-sugar C                       | 6.29, (brs)                        | 5.88, (d, 1.9)                     | 0.41                                                                      |

i) Concentration of **1** and the ratio of Pyridine- $d_5$ / $\text{D}_2\text{O}$  is not known,  $^1\text{H}$  NMR was acquired in 500 MHz spectrometer; ii)  $^1\text{H}$  NMR was recorded in 600 MHz spectrometer by dissolving 7.5 mg of **1** in 0.5 mL Pyridine- $d_5$  and 100  $\mu\text{L}$   $\text{D}_2\text{O}$ ; iii) Chemical shift difference which are  $\geq 0.1$  ppm are highlighted in red.

**Reassigned chemical shifts of reported data and comparison with our assigned chemical shifts in Pyridine- $d_5$ +D $_2$ O (5:1):**

| Position                          | Natural <b>1</b> <sup>i</sup>      | Synthetic <b>1</b> <sup>ii</sup>   | $\Delta^{\text{iii}} = \mathbf{1}_{\text{nat}} - \mathbf{1}_{\text{syn}}$ |
|-----------------------------------|------------------------------------|------------------------------------|---------------------------------------------------------------------------|
| 25-CH <sub>3</sub>                | 0.79 (t, $J = 7.0$ )               | 0.79, (t, $J = 7.3$ )              | 0.00                                                                      |
| CH <sub>3</sub> <sup>b</sup> -iba | 1.18 (d, $J = 7.0$ )               | 1.11, (d, $J = 7.0$ )              | 0.07                                                                      |
| CH <sub>3</sub> <sup>a</sup> -iba | 1.19 (d, $J = 7.0$ )               | 1.14, (d, $J = 7.0$ )              | 0.05                                                                      |
| CH <sub>3</sub> <sup>b</sup> -iba | 1.20 (d, $J = 7.0$ )               | 1.15, (d, $J = 7.0$ )              | 0.05                                                                      |
| CH <sub>3</sub> <sup>a</sup> -iba | 1.23 (d, $J = 7.0$ )               | 1.17, (d, $J = 7.0$ )              | 0.06                                                                      |
| 5-CH <sub>3</sub> -sugar D        | 1.32 (d, $J = 6.1$ )               | 1.24, (d, $J = 6.2$ )              | 0.08                                                                      |
| 5-CH <sub>3</sub> -sugar C        | 1.50, (d, $J = 6.4$ )              | 1.45, (d, $J = 6.2$ )              | 0.05                                                                      |
| 5-CH <sub>3</sub> -sugar B        | 1.56, (d, $J = 6.1$ )              | 1.48, (d, $J = 6.1$ )              | 0.07                                                                      |
| 5-CH <sub>3</sub> -sugar A        | 1.57, (d, $J = 6.1$ )              | 1.49, (d, $J = 6.2$ )              | 0.08                                                                      |
| 11-H <sup>a</sup>                 | 2.41, (ddd, $J = 14.6, 6.9, 3.0$ ) | 2.43, (ddd, $J = 15.8, 8.9, 3.2$ ) | - 0.03                                                                    |
| 11-H <sup>b</sup>                 | 2.16, (ddd, $J = 14.6, 6.9, 3.0$ ) | 2.54, (ddd, $J = 15.8, 8.9, 3.2$ ) | - 0.38                                                                    |
| 9-H                               | 2.66, (m)                          | 2.65, (septet, $J = 7.0$ )         | 0.01                                                                      |
| 7-H                               | 2.67, (m)                          | 2.69, (septet, $J = 7.0$ )         | - 0.02                                                                    |
| 20-H                              | 3.87, (m)                          | 3.43-3.48, (m)                     | 0.41                                                                      |
| 1-H-sugar D                       | 5.60, (brs)                        | 5.51, (d, $J = 1.7$ )              | 0.09                                                                      |
| 1-H-sugar A                       | 5.33, (brs)                        | 5.47, (d, $J = 1.7$ )              | - 0.14                                                                    |
| 3-H-sugar C                       | 5.61, (dd, $J = 3.0, 9.5$ )        | 5.45, (dd, $J = 2.7, 9.4$ )        | 0.16                                                                      |
| 3-H-sugar B                       | 5.65, (dd, $J = 3.0, 9.5$ )        | 5.83, (dd, $J = 2.8, 10.0$ )       | - 0.18                                                                    |
| 4-H-sugar A                       | 5.67, (dd, $J = 9.5, 9.5$ )        | 5.54, (dd, $J = 9.8, 9.8$ )        | 0.13                                                                      |
| 1-H-sugar B                       | 6.29, (brs)                        | 5.51, (d, $J = 1.6$ )              | 0.78                                                                      |
| 1-H-sugar C                       | 5.80, (brs)                        | 5.88, (d, 1.9)                     | - 0.08                                                                    |

i) Reassigned reported chemical shifts for **1** (concentration of **1** and the ratio of Pyridine- $d_5$ /D $_2$ O is not known, <sup>1</sup>H NMR was acquired in 500 MHz spectrometer); ii) <sup>1</sup>H NMR was recorded in 600 MHz spectrometer by dissolving 7.5 mg of **1** in 0.5 mL Pyridine- $d_5$  and 100  $\mu$ L D $_2$ O; iii) Chemical shift difference which are  $\geq 0.1$  ppm are highlighted in red.



**Comparison of limited reported  $^1\text{H}$  chemical shifts and coupling constants in Pyridine- $d_5$  +  $\text{D}_2\text{O}$  (5:1) with our NMR analysis in Pyridine- $d_5$ :**

| Position                      | Natural $\mathbf{1}^{\text{i}}$    | Synthetic $\mathbf{1}^{\text{ii}}$ | $\Delta^{\text{iii}} = \mathbf{1}_{\text{nat}} - \mathbf{1}_{\text{syn}}$ |
|-------------------------------|------------------------------------|------------------------------------|---------------------------------------------------------------------------|
| 25- $\text{CH}_3$             | 0.79 (t, $J = 7.0$ )               | 0.86, (t, $J = 7.3$ )              | - 0.07                                                                    |
| $\text{CH}_3^{\text{b}}$ -iba | 1.18 (d, $J = 7.0$ )               | 1.06, (d, $J = 7.0$ )              | <b>0.12</b>                                                               |
| $\text{CH}_3^{\text{a}}$ -iba | 1.19 (d, $J = 7.0$ )               | 1.15, (d, $J = 7.0$ )              | 0.04                                                                      |
| $\text{CH}_3^{\text{b}}$ -iba | 1.20 (d, $J = 7.0$ )               | 1.16, (d, $J = 7.0$ )              | 0.04                                                                      |
| $\text{CH}_3^{\text{a}}$ -iba | 1.23 (d, $J = 7.0$ )               | 1.18, (d, $J = 7.0$ )              | 0.05                                                                      |
| 5- $\text{CH}_3$ -sugar D     | 1.32 (d, $J = 6.1$ )               | 1.58, (d, $J = 6.4$ )              | <b>- 0.26</b>                                                             |
| 5- $\text{CH}_3$ -sugar C     | 1.50, (d, $J = 6.4$ )              | 1.56, (d, $J = 6.2$ )              | - 0.06                                                                    |
| 5- $\text{CH}_3$ -sugar B     | 1.56, (d, $J = 6.1$ )              | 1.59, (d, $J = 6.4$ )              | - 0.03                                                                    |
| 5- $\text{CH}_3$ -sugar A     | 1.57, (d, $J = 6.1$ )              | 1.36, (d, $J = 6.3$ )              | <b>0.21</b>                                                               |
| 11- $\text{H}^{\text{a}}$     | 2.16, (ddd, $J = 14.6, 6.9, 3.0$ ) | 2.23, (ddd, $J = 16.0, 9.5, 3.1$ ) | - 0.07                                                                    |
| 11- $\text{H}^{\text{b}}$     | 2.41, (ddd, $J = 14.6, 6.9, 3.0$ ) | 2.41, (ddd, $J = 16.0, 9.5, 3.1$ ) | 0.00                                                                      |
| 9-H                           | 2.66, (m)                          | 2.56, (septet, $J = 7.0$ )         | <b>0.10</b>                                                               |
| 7-H                           | 2.67, (m)                          | 2.62, (septet, $J = 7.0$ )         | 0.05                                                                      |
| 20-H                          | 3.87, (m)                          | 3.51-3.55, (m)                     | <b>0.34</b>                                                               |
| 1-H-sugar D                   | 5.33, (brs)                        | 5.31, (d, $J = 2.0$ )              | 0.02                                                                      |
| 1-H-sugar A                   | 5.60, (brs)                        | 5.72, (d, $J = 1.8$ )              | <b>- 0.12</b>                                                             |
| 3-H-sugar C                   | 5.61, (dd, $J = 3.0, 9.5$ )        | 5.06, (dd, $J = 2.5, 9.8$ )        | <b>0.55</b>                                                               |
| 3-H-sugar B                   | 5.65, (dd, $J = 3.0, 9.5$ )        | 5.69, (dd, $J = 3.2, 9.1$ )        | - 0.03                                                                    |
| 4-H-sugar A                   | 5.67, (dd, $J = 9.5, 9.5$ )        | 5.81, (dd, $J = 9.5, 9.5$ )        | <b>- 0.14</b>                                                             |
| 1-H-sugar B                   | 5.80, (brs)                        | 5.68, (d, $J = 1.8$ )              | <b>0.12</b>                                                               |
| 1-H-sugar C                   | 6.29, (brs)                        | 6.10, (d, $J = 2.2$ )              | <b>0.19</b>                                                               |

i) Reported chemical shifts and coupling constants for  $\mathbf{1}$  (concentration of  $\mathbf{1}$  and the ratio of Pyridine- $d_5/\text{D}_2\text{O}$  is not known,  $^1\text{H}$  NMR was acquired in 500 MHz spectrometer); ii)  $^1\text{H}$  NMR was recorded in 600 MHz spectrometer by dissolving 7.5 mg of  $\mathbf{1}$  in 0.5 mL Pyridine- $d_5$ ; iii) Chemical shift difference which are ( $\Delta \geq 0.1$ ) ppm are highlighted in red.

**Comparison of limited reported  $^{13}\text{C}$  chemical shifts and our completely assigned chemical shifts in Pyridine- $d_5$ :**

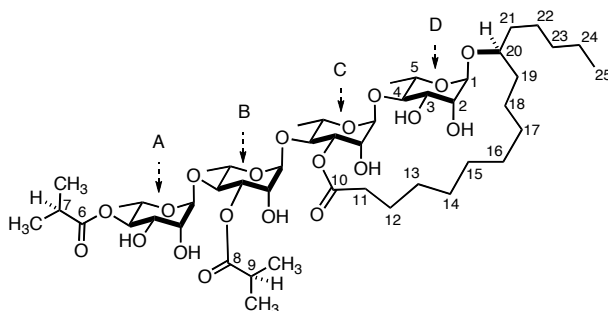

| Position          | Natural <sup>i</sup><br><b>1</b> | Synthetic <sup>ii</sup><br><b>1</b> | $\Delta$ <sup>iii</sup><br>( <b>1</b> <sub>syn</sub> - <b>1</b> <sub>nat</sub> ) |
|-------------------|----------------------------------|-------------------------------------|----------------------------------------------------------------------------------|
| C-6, C=O-iba      | 176.5                            | 176.7                               | 0.2                                                                              |
| C-8, C=O-iba      | 175.7                            | 176.4                               | 0.7                                                                              |
| C-10, C=O-aglycon | 174.1                            | 173.8                               | -0.3                                                                             |
| C-1, sugar A      | 103.0                            | 103.3                               | 0.3                                                                              |
| C-1, sugar B      | 102.3                            | 103.0                               | 0.7                                                                              |
| C-1, sugar C      | 102.1                            | 101.8                               | 0.2                                                                              |
| C-1, sugar D      | 99.8                             | 100.2                               | -0.4                                                                             |

i) Limited reported  $^{13}\text{C}$  NMR shifts in Pyridine- $d_5$  in descending order recorded in 125 MHz spectrometer; ii) Completely assigned  $^{13}\text{C}$  NMR shifts recorded in 150 MHz spectrometer; iii) chemical shift difference ( $\Delta \geq 0.5$ ) are highlighted in red.

## Section C: $^1\text{H}$ , $^{13}\text{C}$ NMR Spectra and Correlation Studies

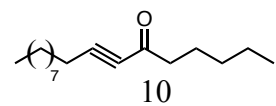

$^1\text{H}$  NMR ( $\text{CDCl}_3$ , 400 MHz)

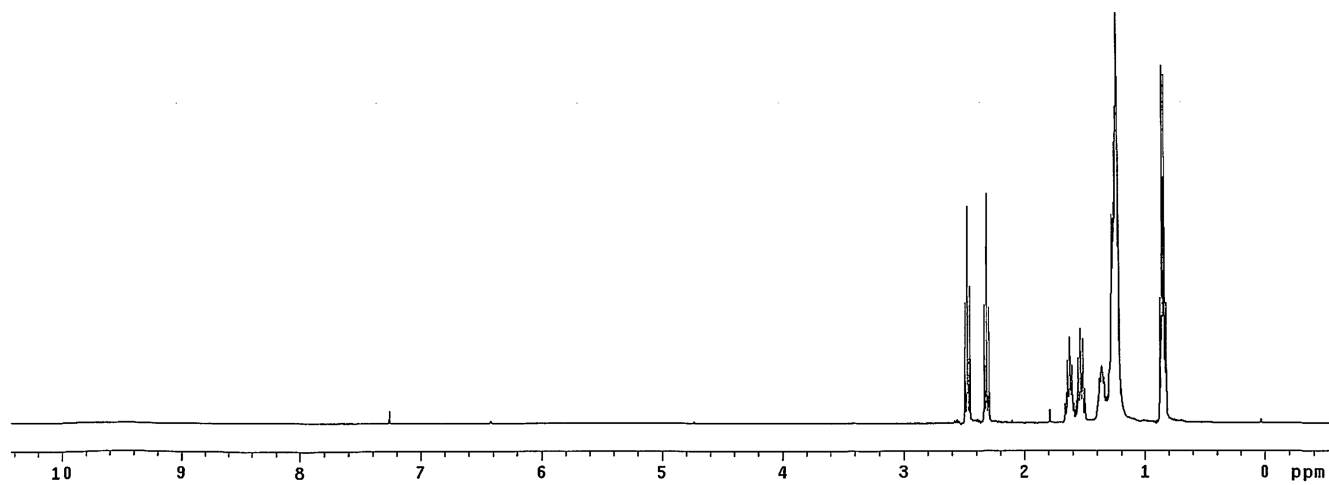

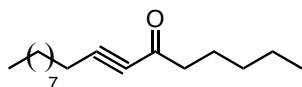

10

<sup>13</sup>C NMR (CDCl<sub>3</sub>, 100 MHz)

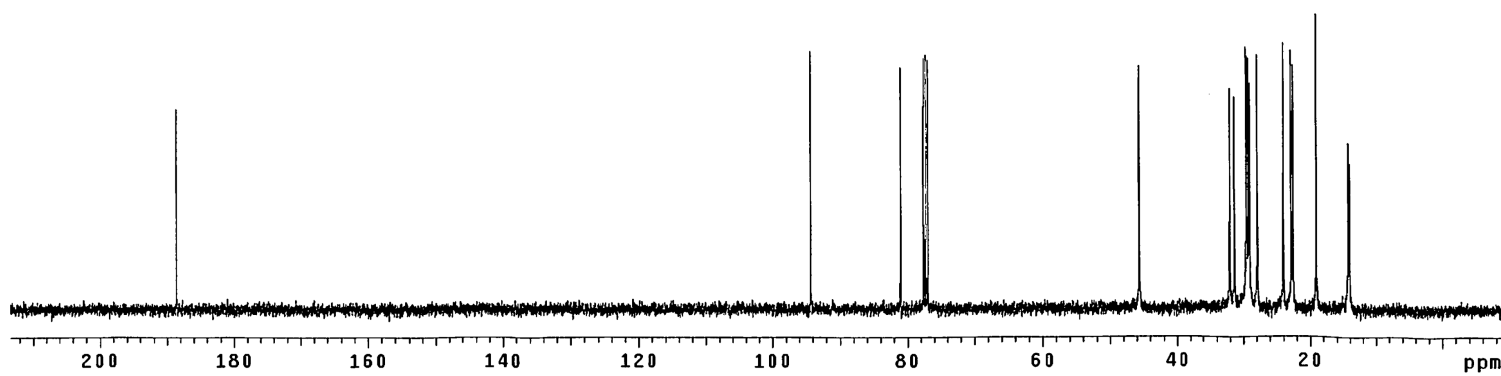

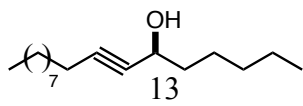

<sup>1</sup>H NMR (CDCl<sub>3</sub>, 400 MHz)

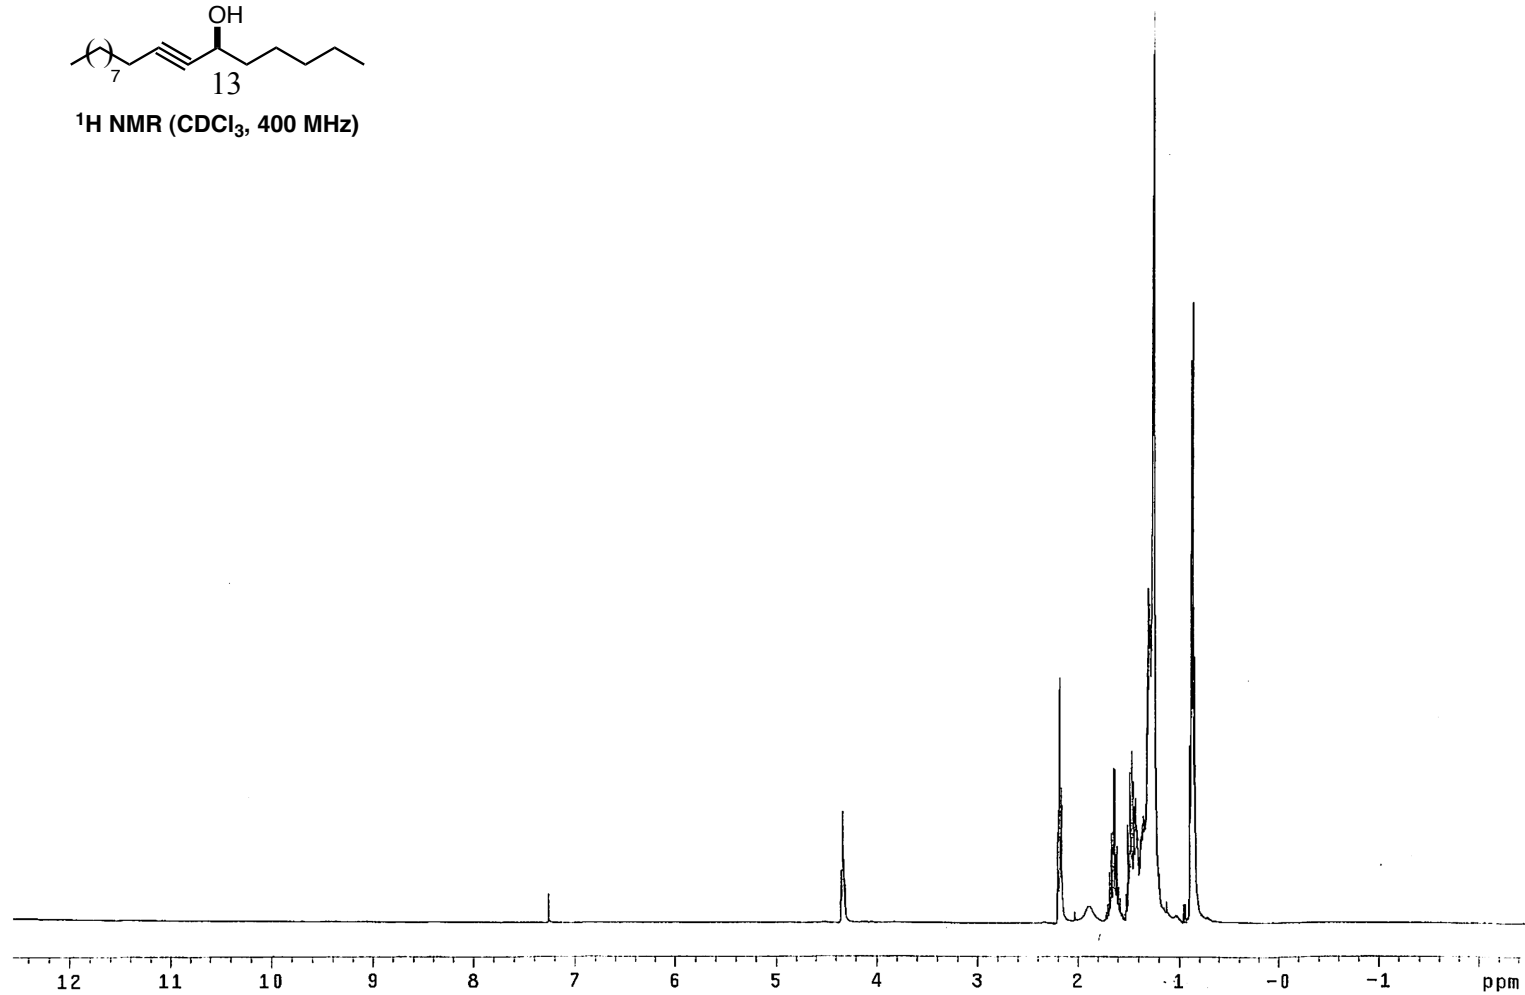

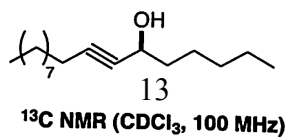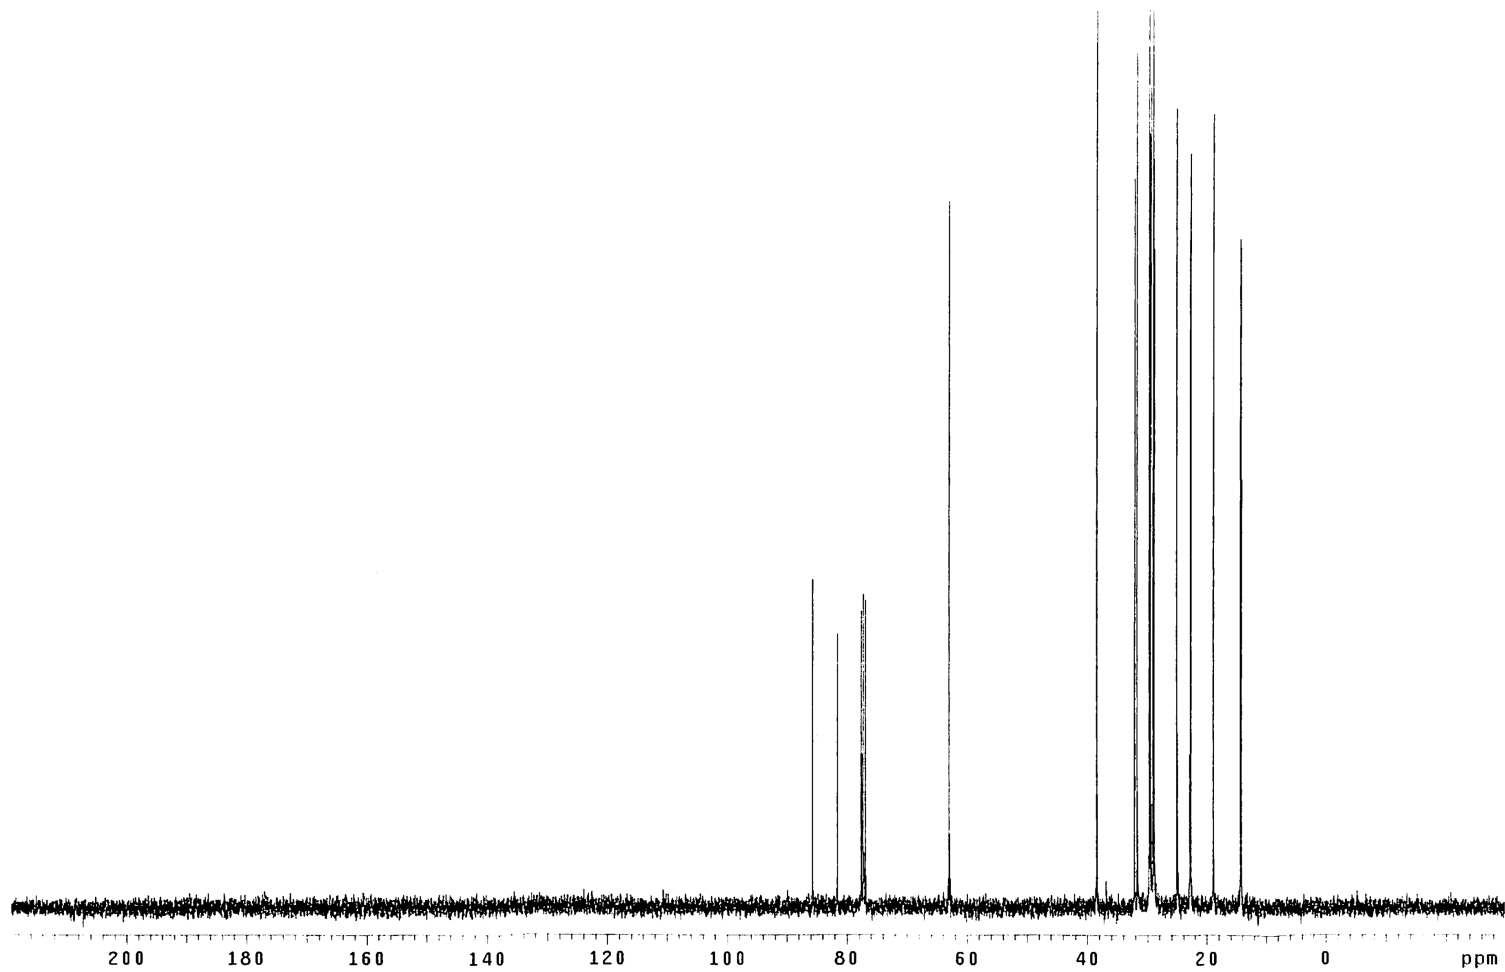

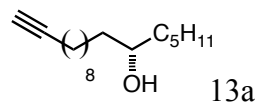

<sup>1</sup>H NMR (CDCl<sub>3</sub>, 400 MHz)

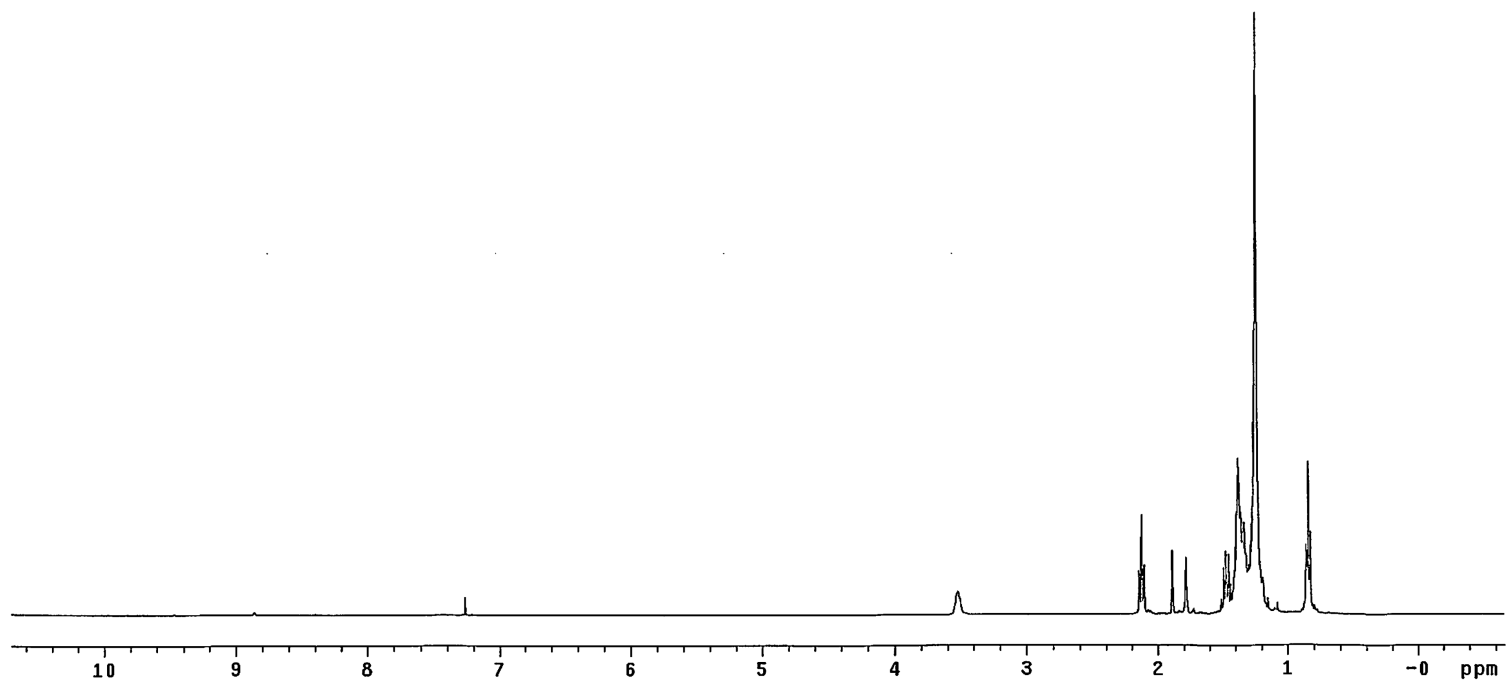

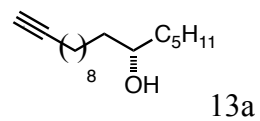

<sup>13</sup>C NMR (CDCl<sub>3</sub>, 100 MHz)

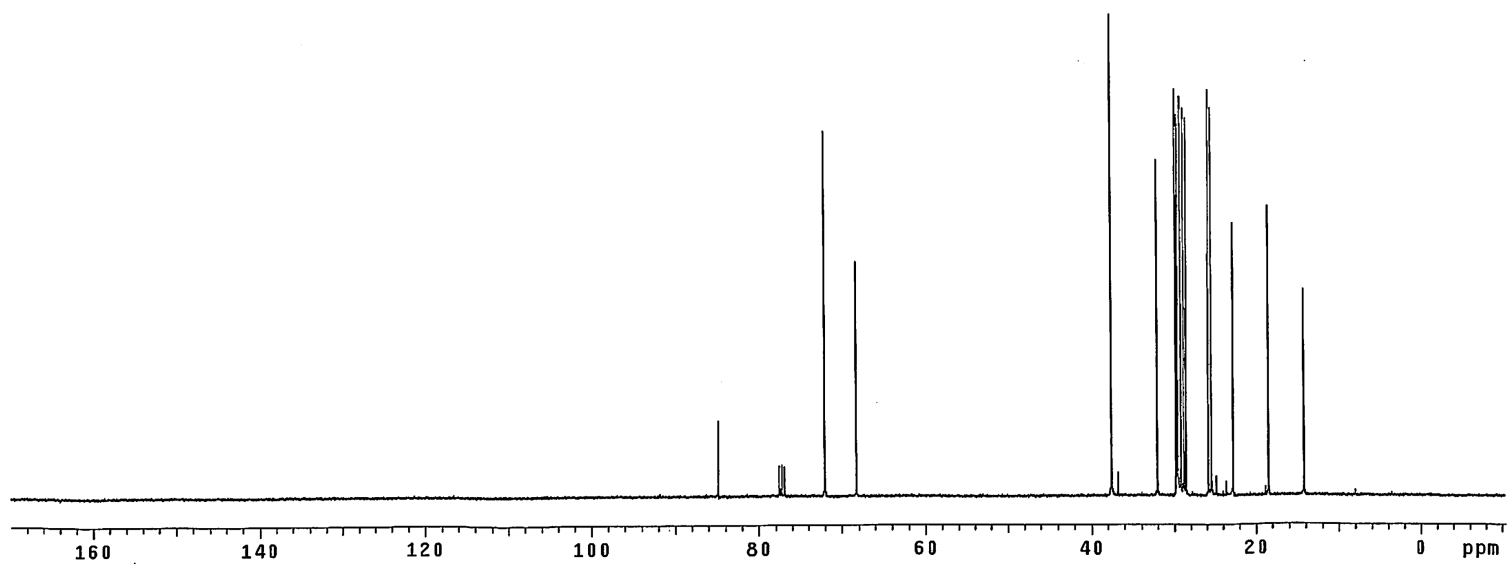



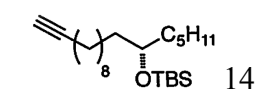

<sup>1</sup>H NMR (CDCl<sub>3</sub>, 400 MHz)

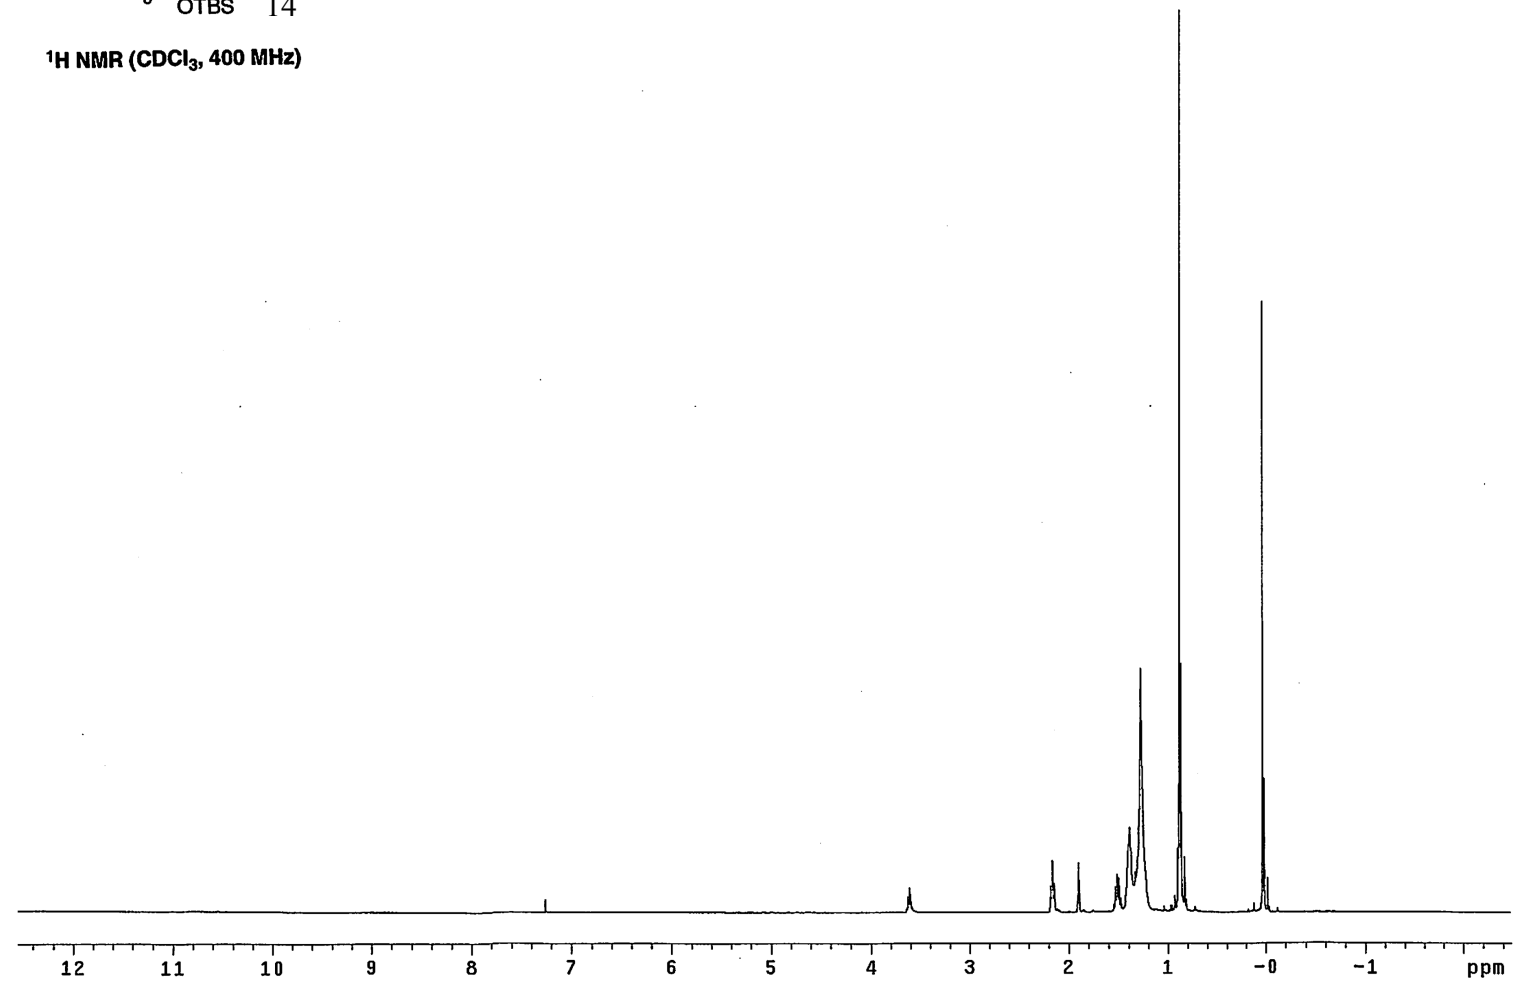

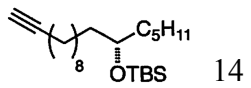

$^{13}\text{C}$  NMR ( $\text{CDCl}_3$ , 100 MHz)

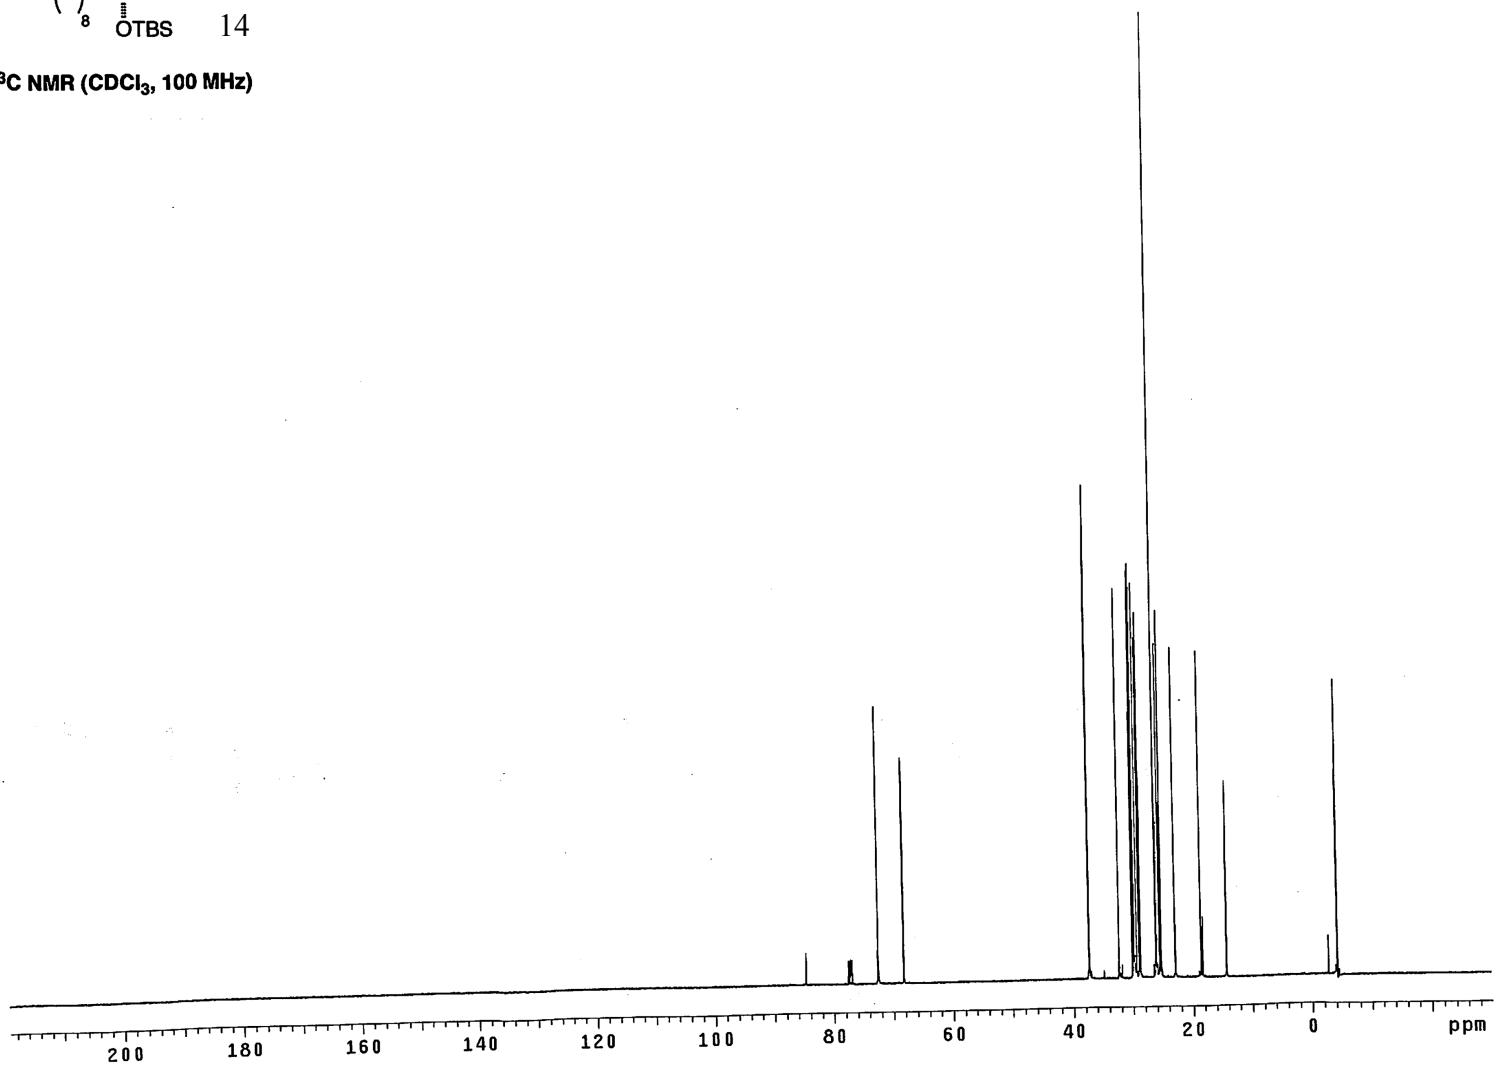

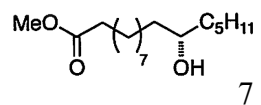

<sup>1</sup>H NMR (CDCl<sub>3</sub>, 400 MHz)

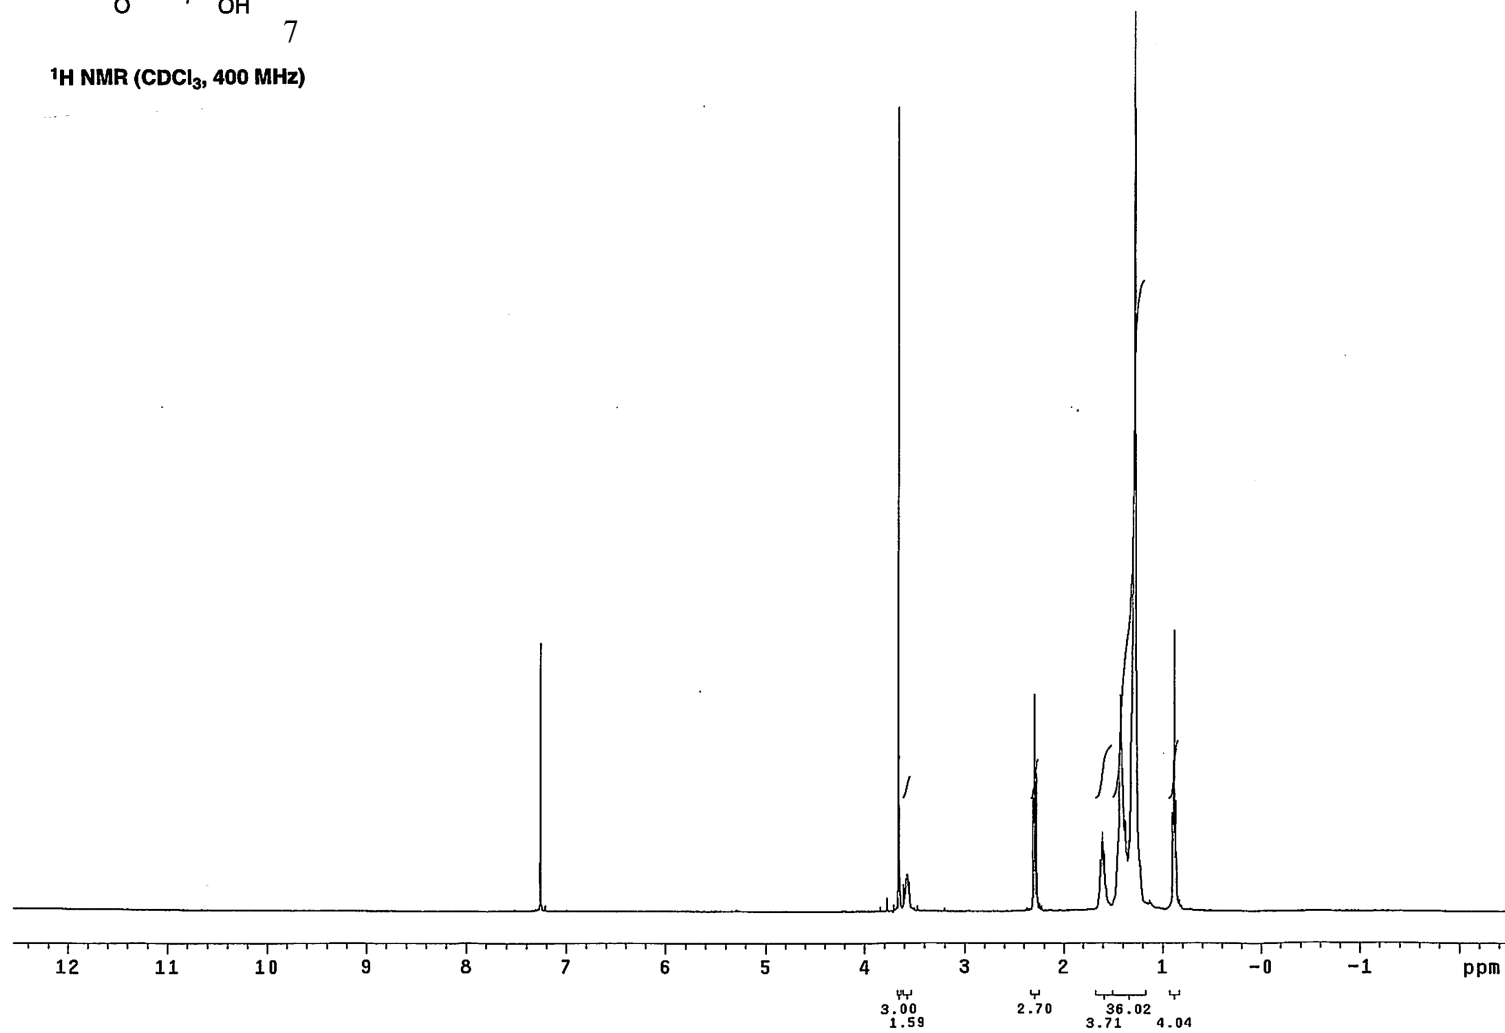

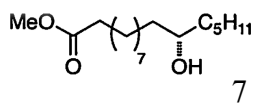

$^{13}\text{C}$  NMR ( $\text{CDCl}_3$ , 100 MHz)

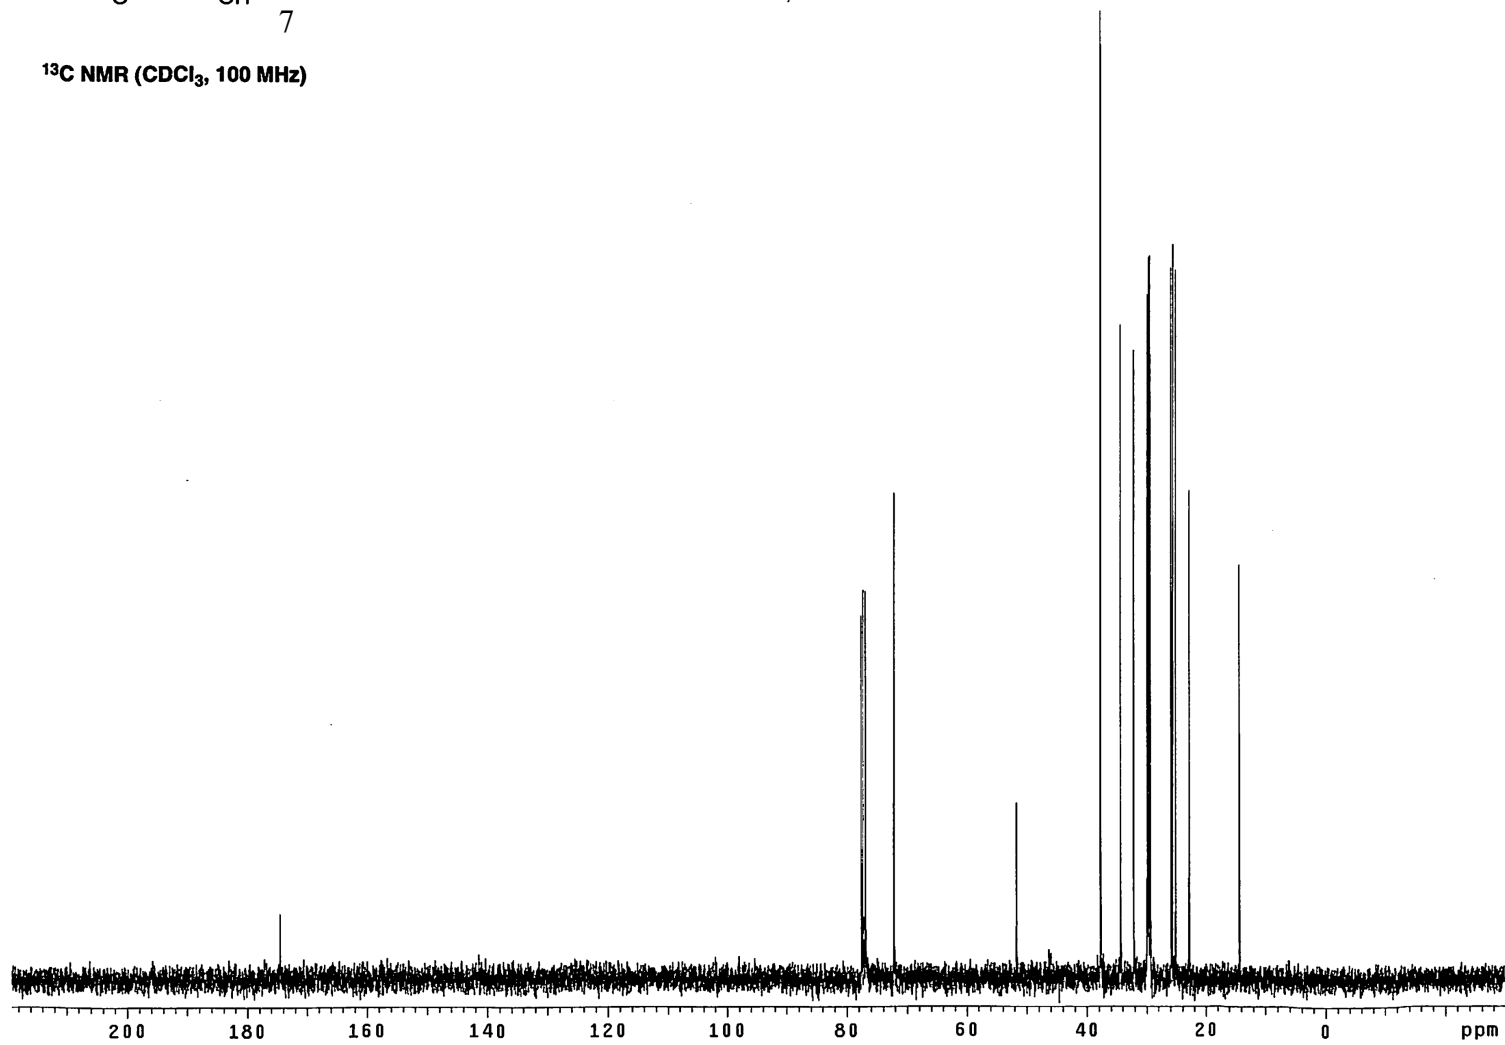

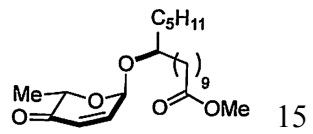

<sup>1</sup>H NMR (CDCl<sub>3</sub>, 400 MHz)

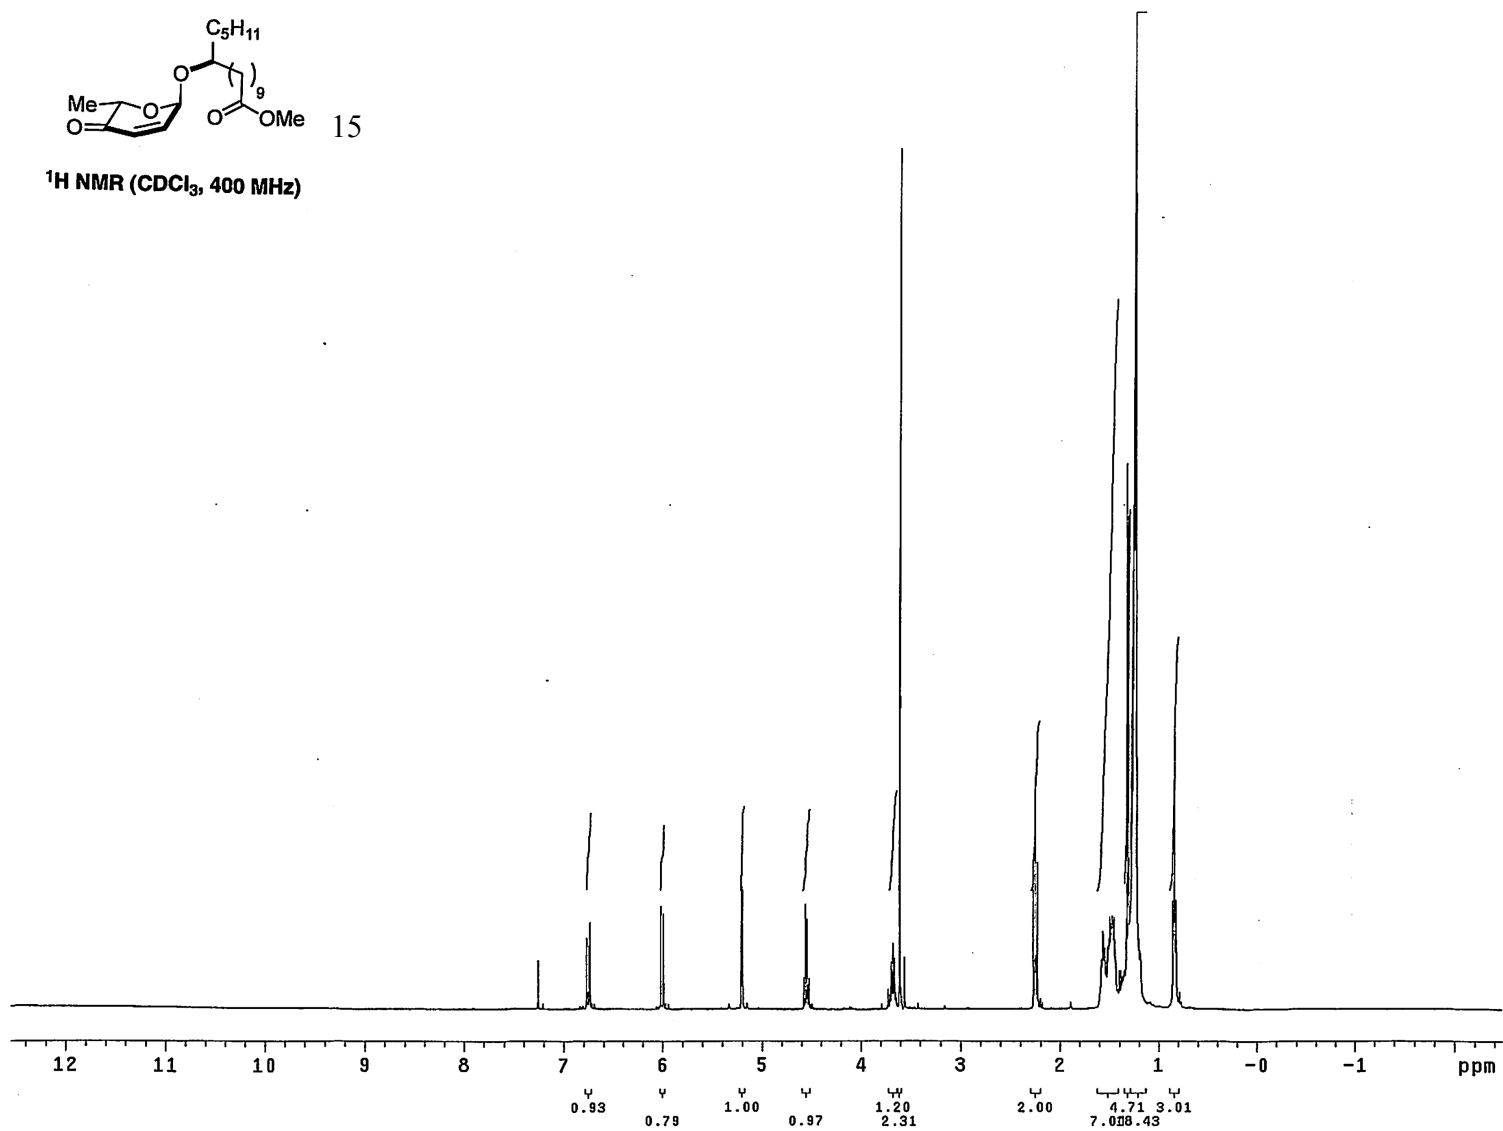

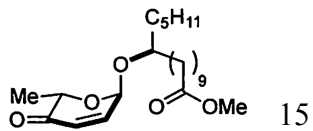

$^{13}\text{C}$  NMR ( $\text{CDCl}_3$ , 100 MHz)

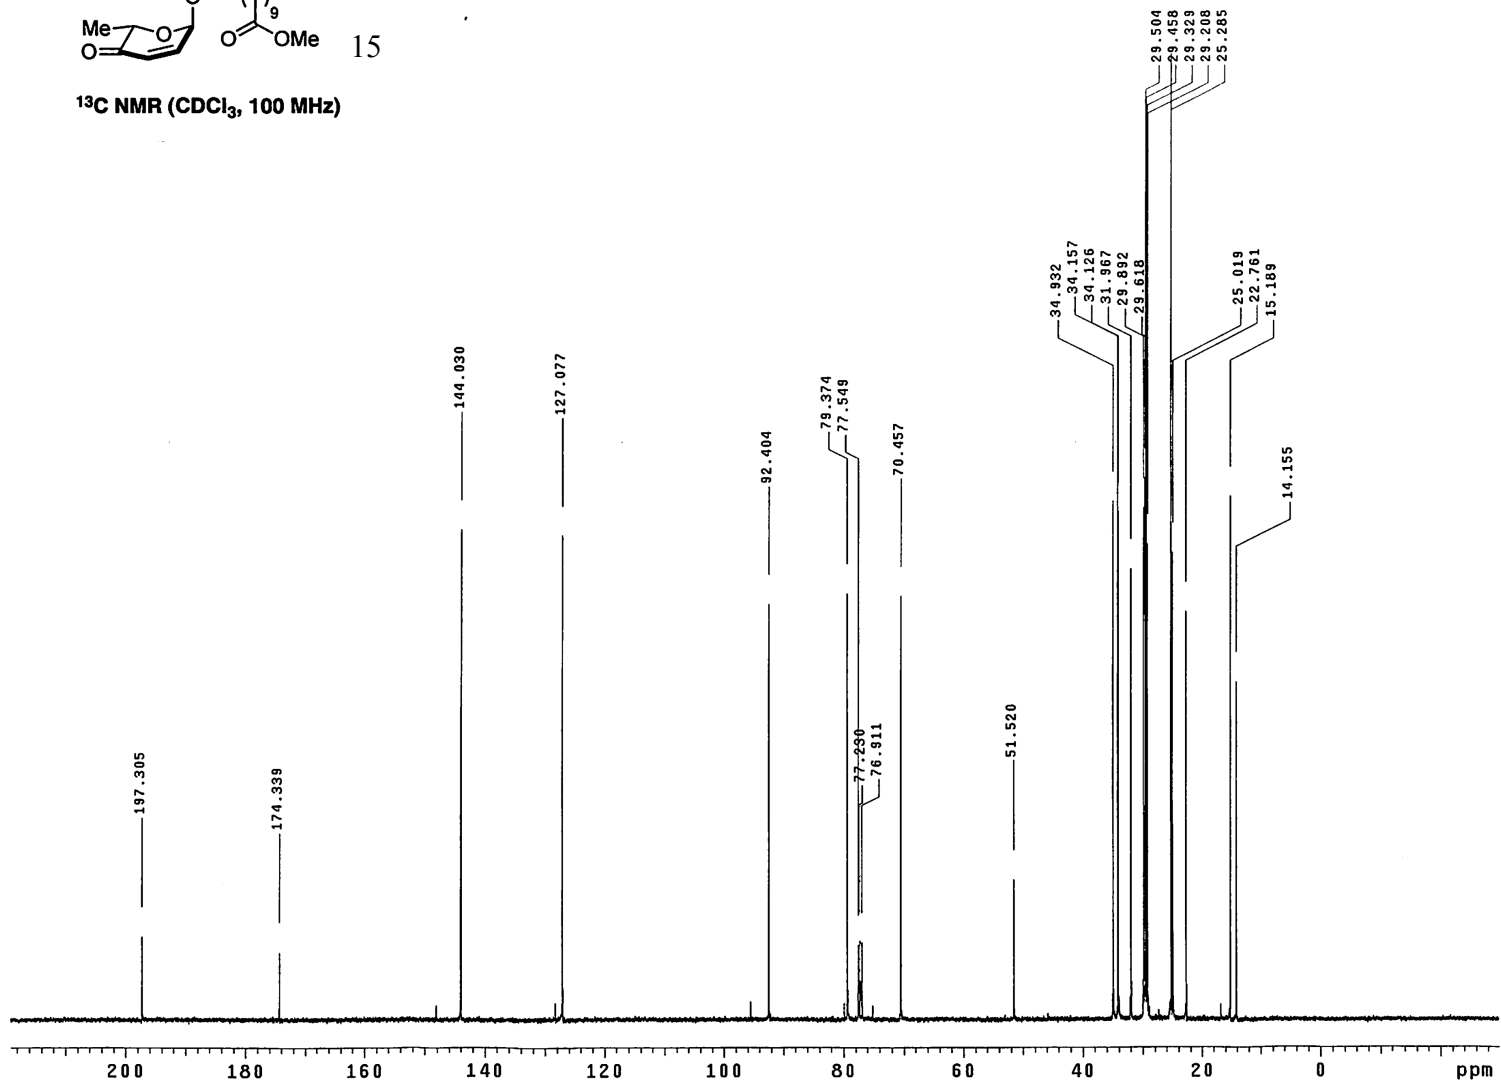

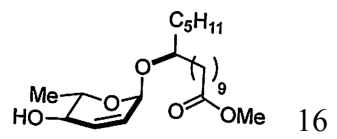

$^1\text{H NMR}$  ( $\text{CDCl}_3$ , 400 MHz)

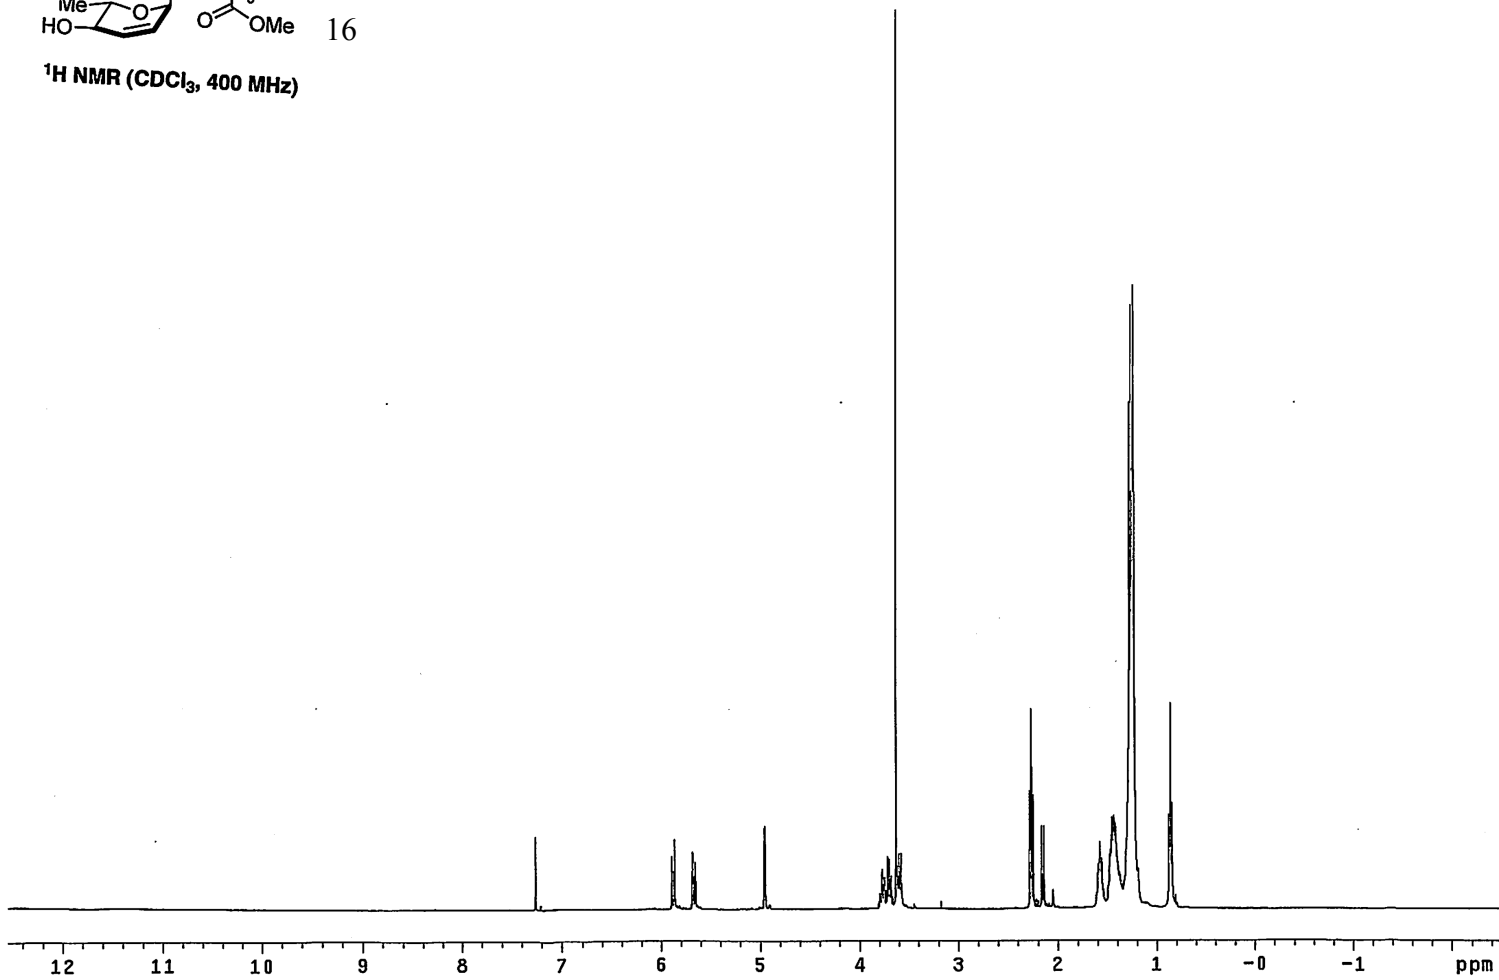

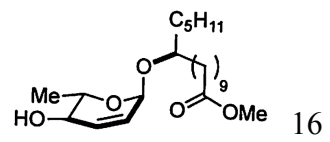

<sup>13</sup>C NMR (CDCl<sub>3</sub>, 100 MHz)

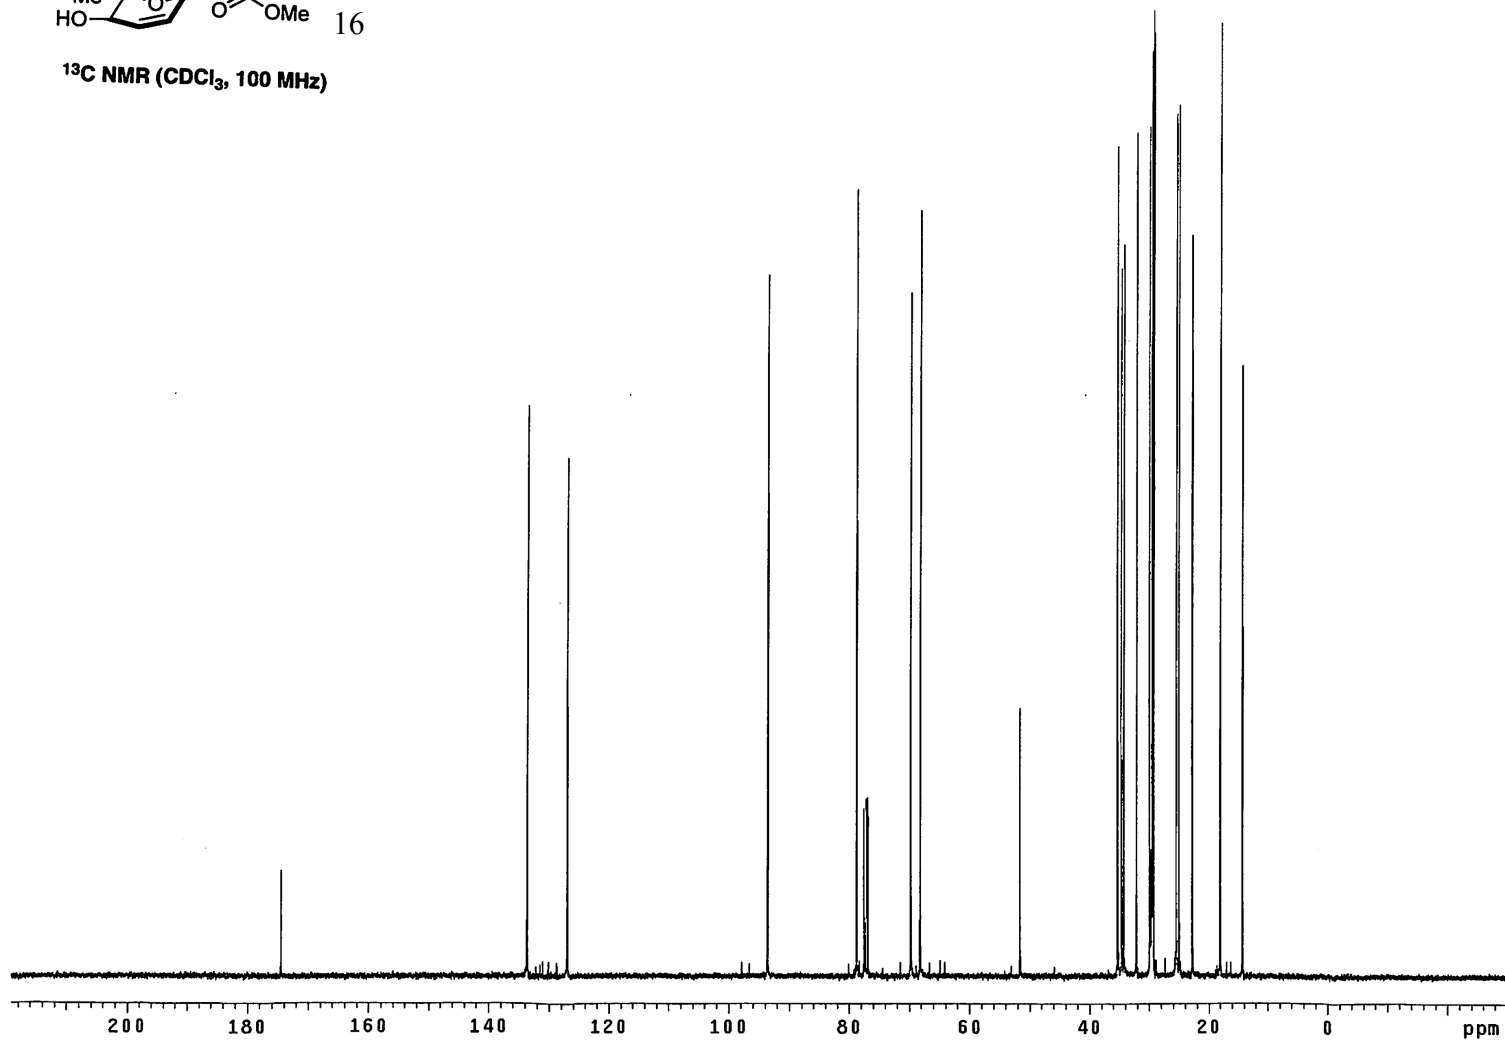



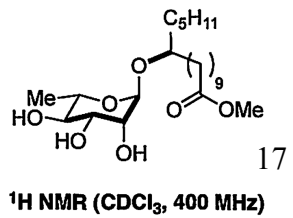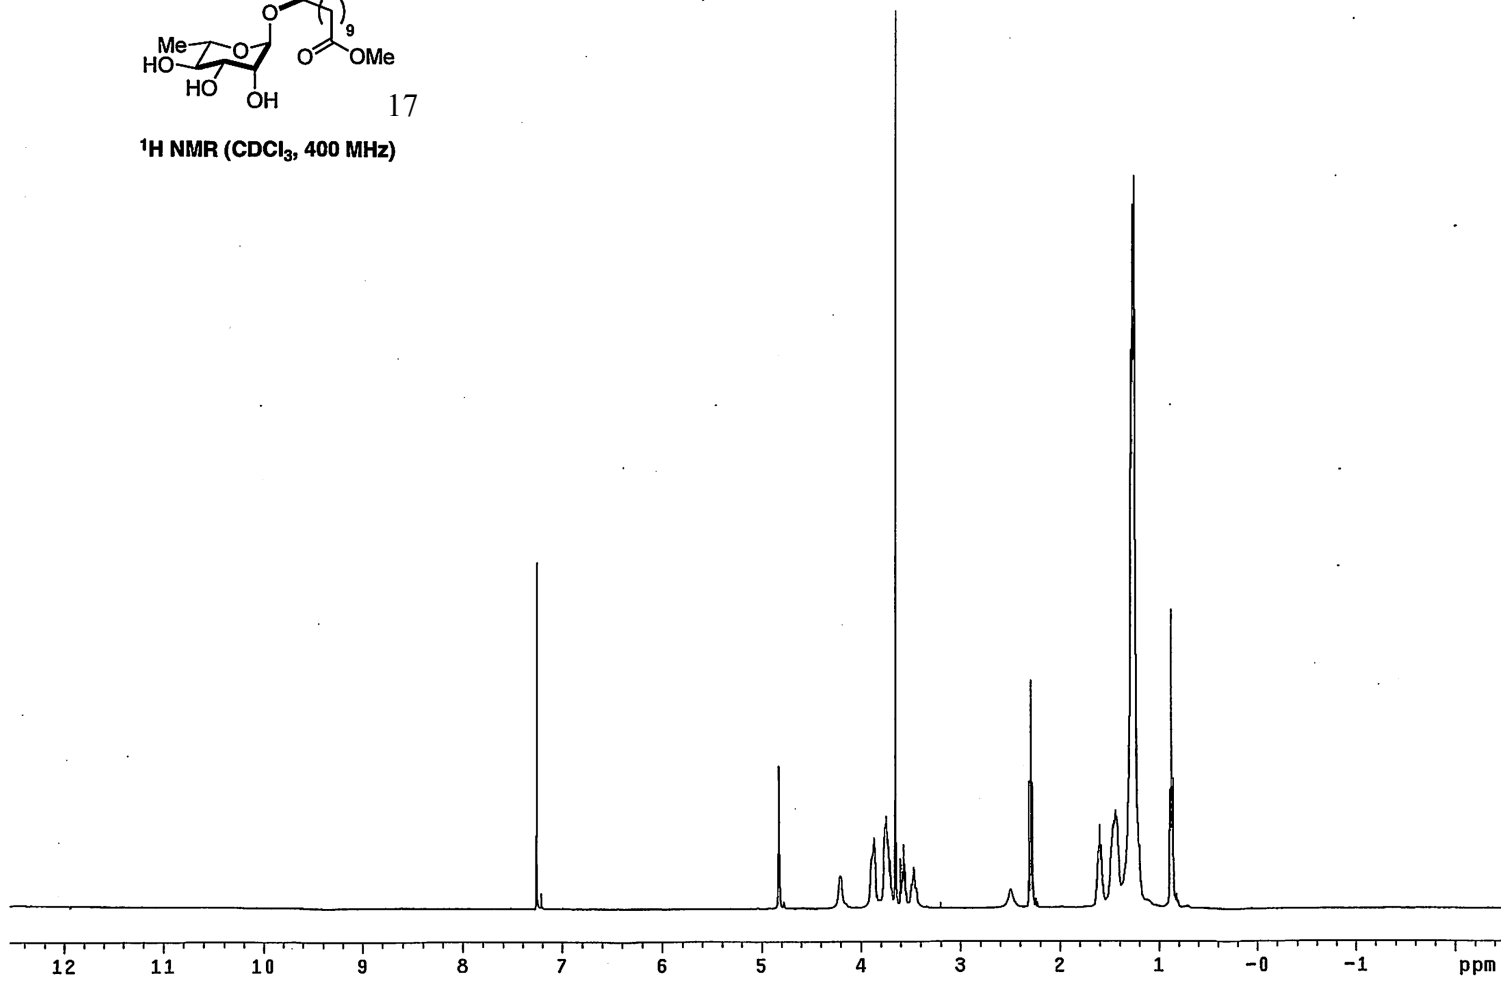

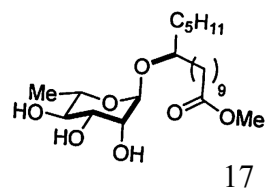

$^{13}\text{C}$  NMR ( $\text{CDCl}_3$ , 100 MHz)

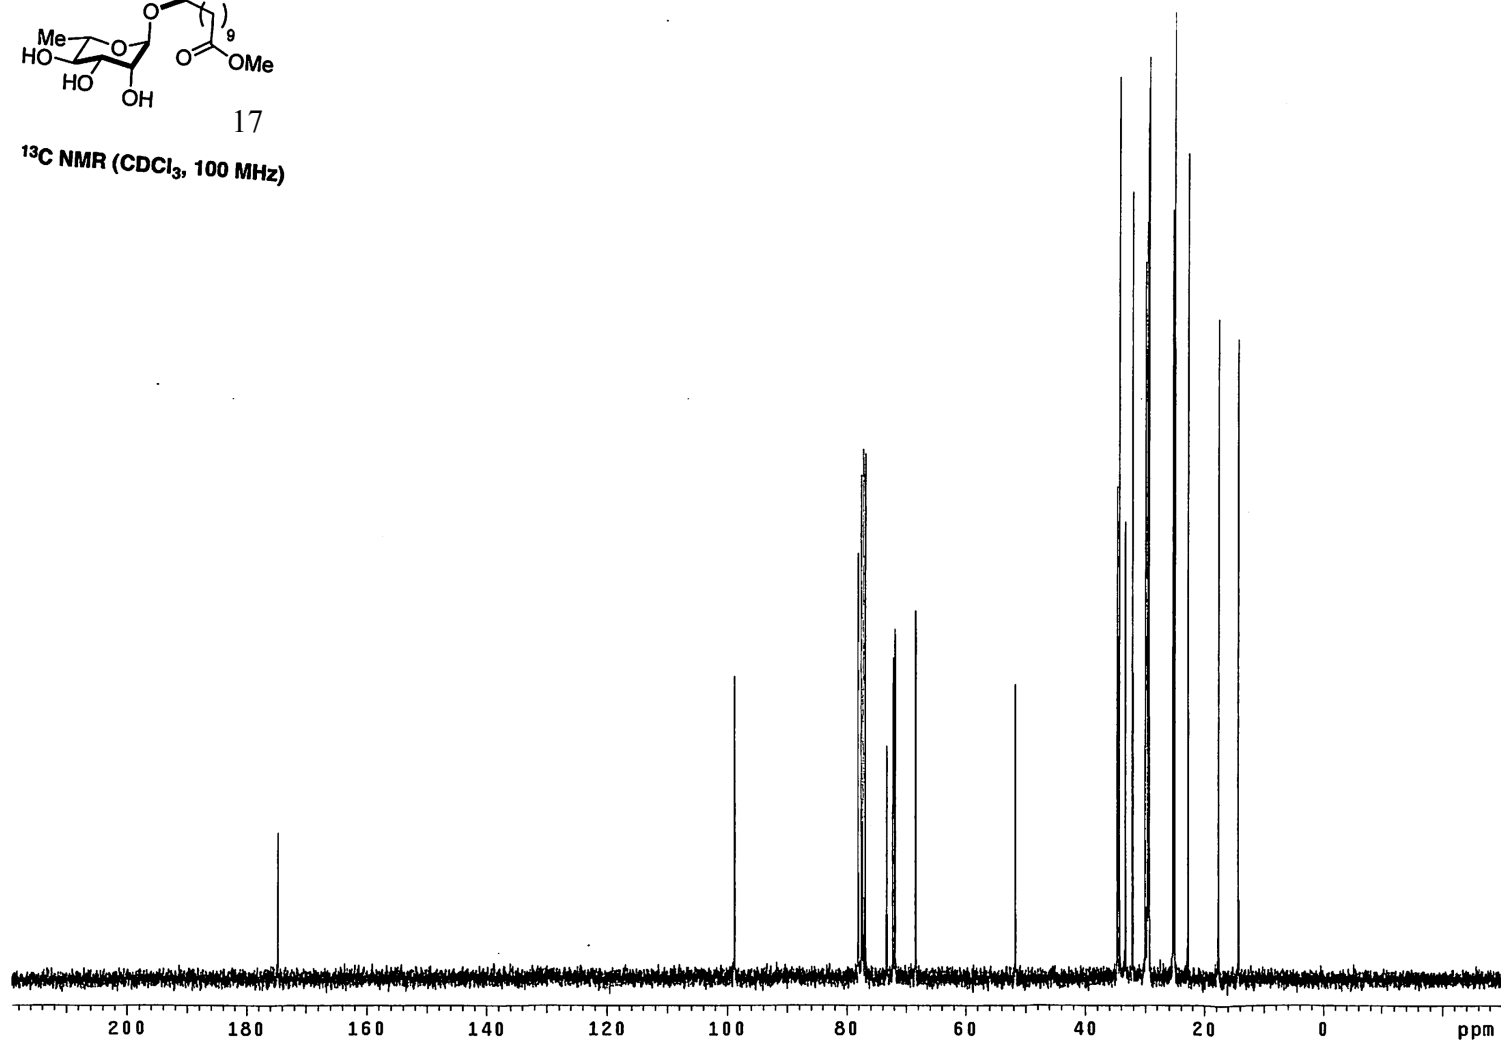

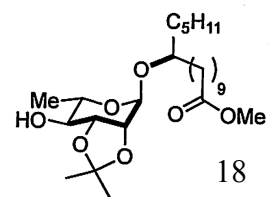

$^1\text{H NMR}$  ( $\text{CDCl}_3$ , 400 MHz)

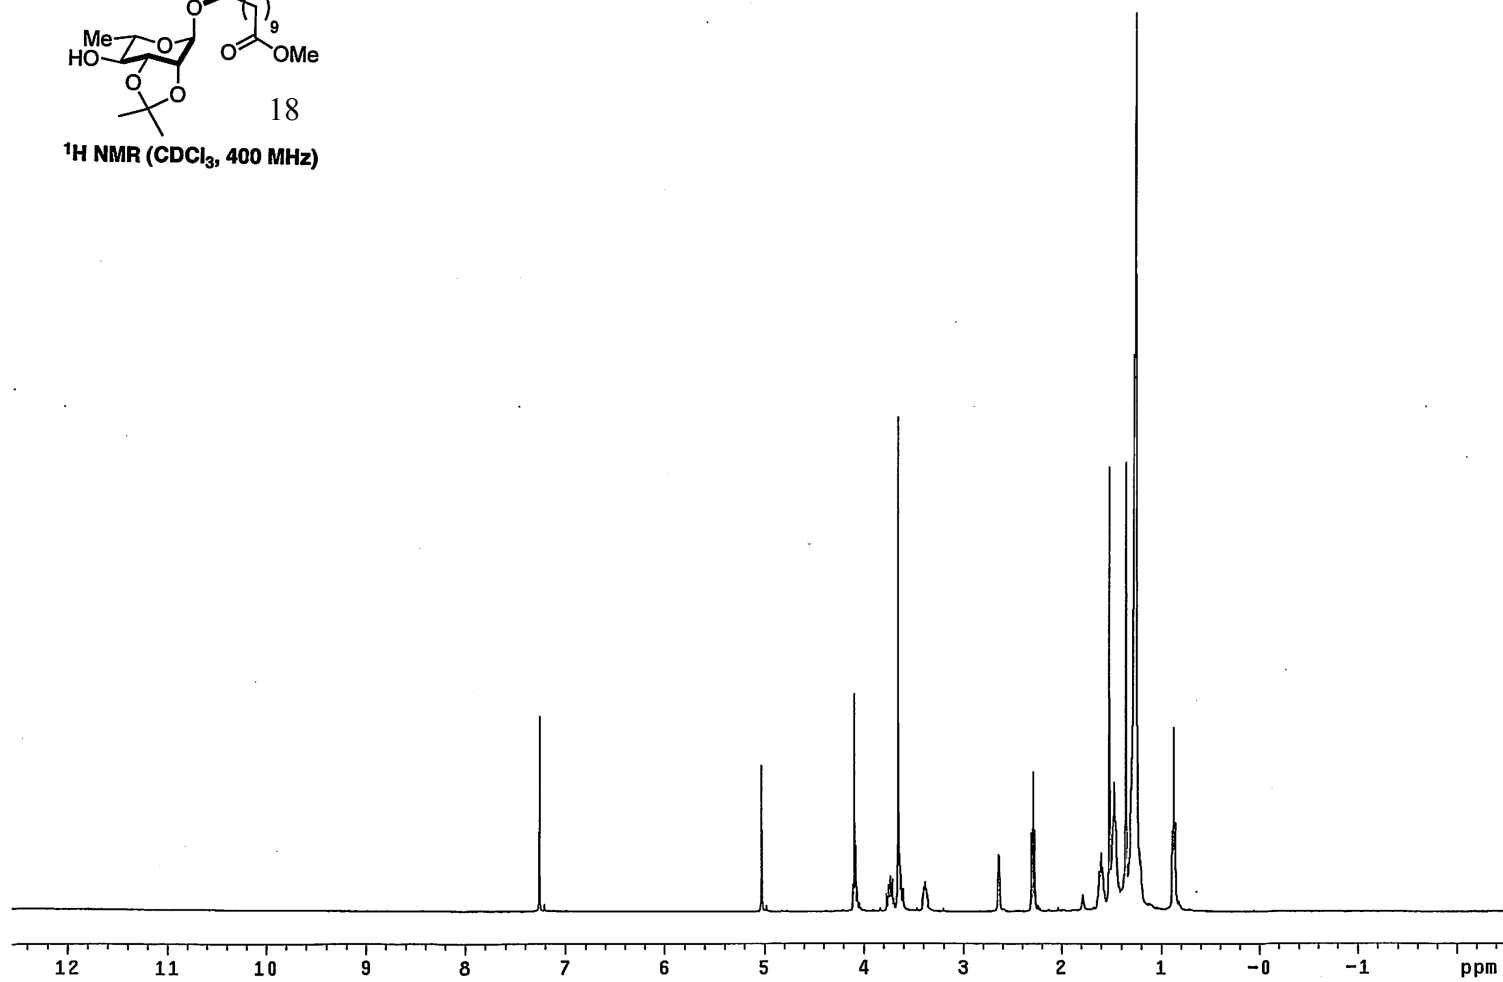

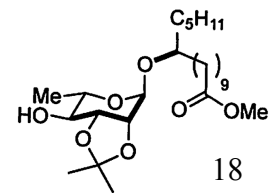

<sup>13</sup>C NMR (CDCl<sub>3</sub>, 100 MHz)

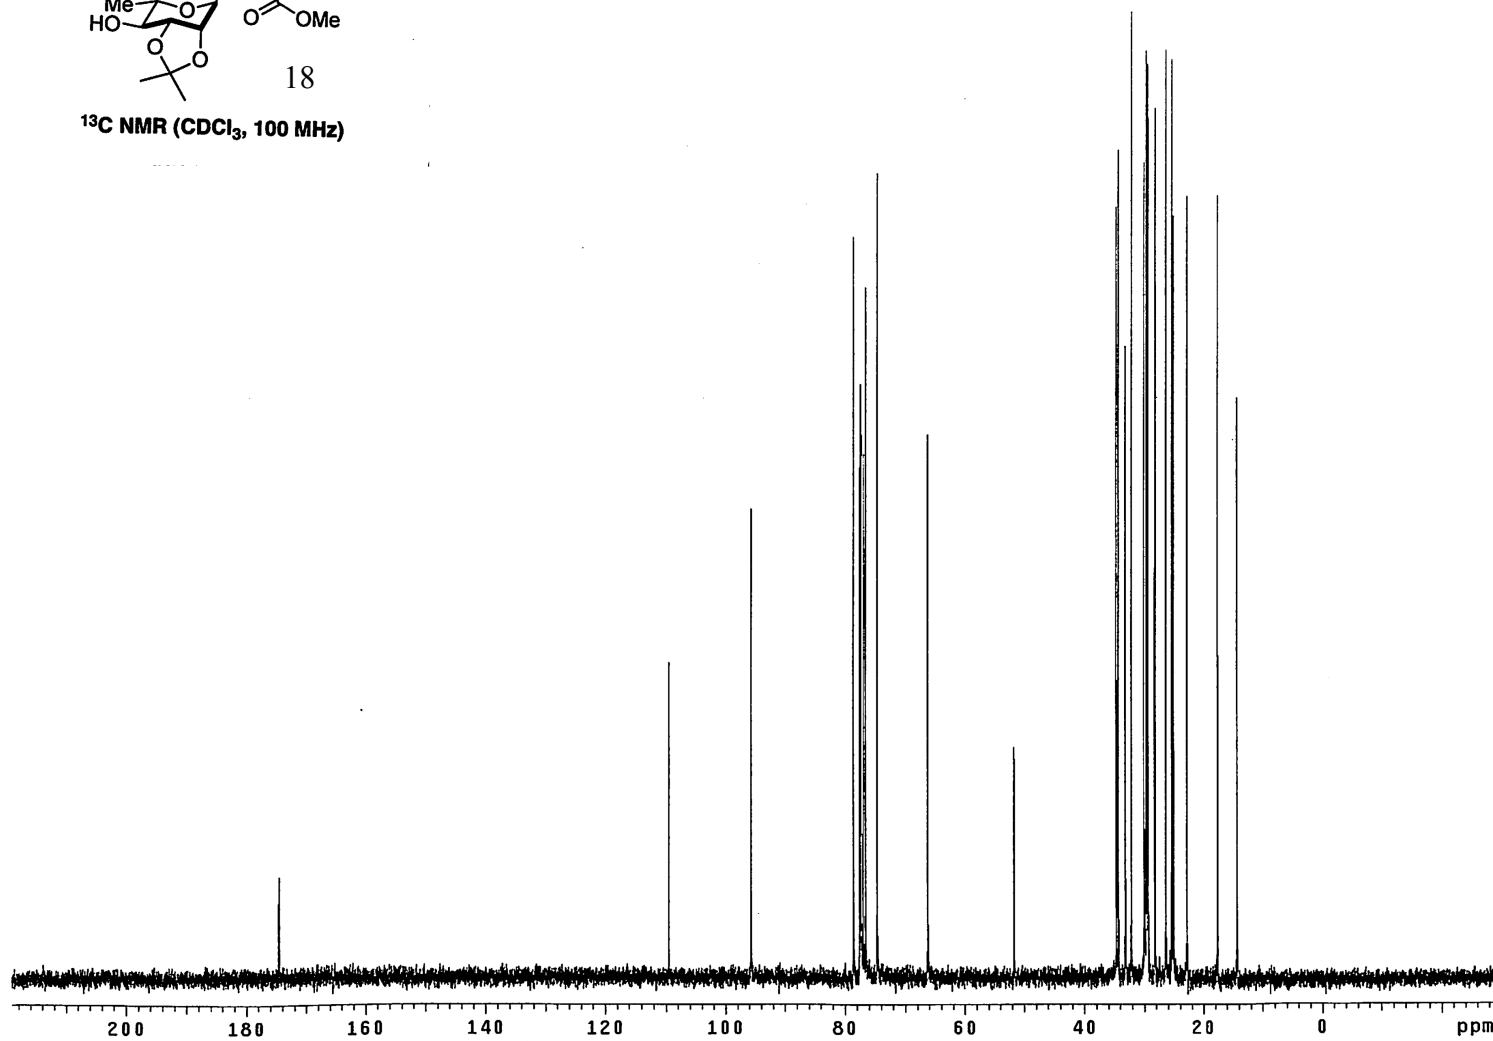

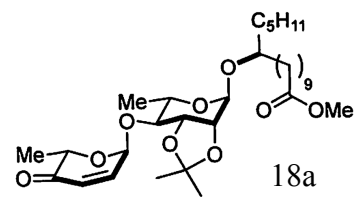

$^1\text{H NMR}$  ( $\text{CDCl}_3$ , 400 MHz)

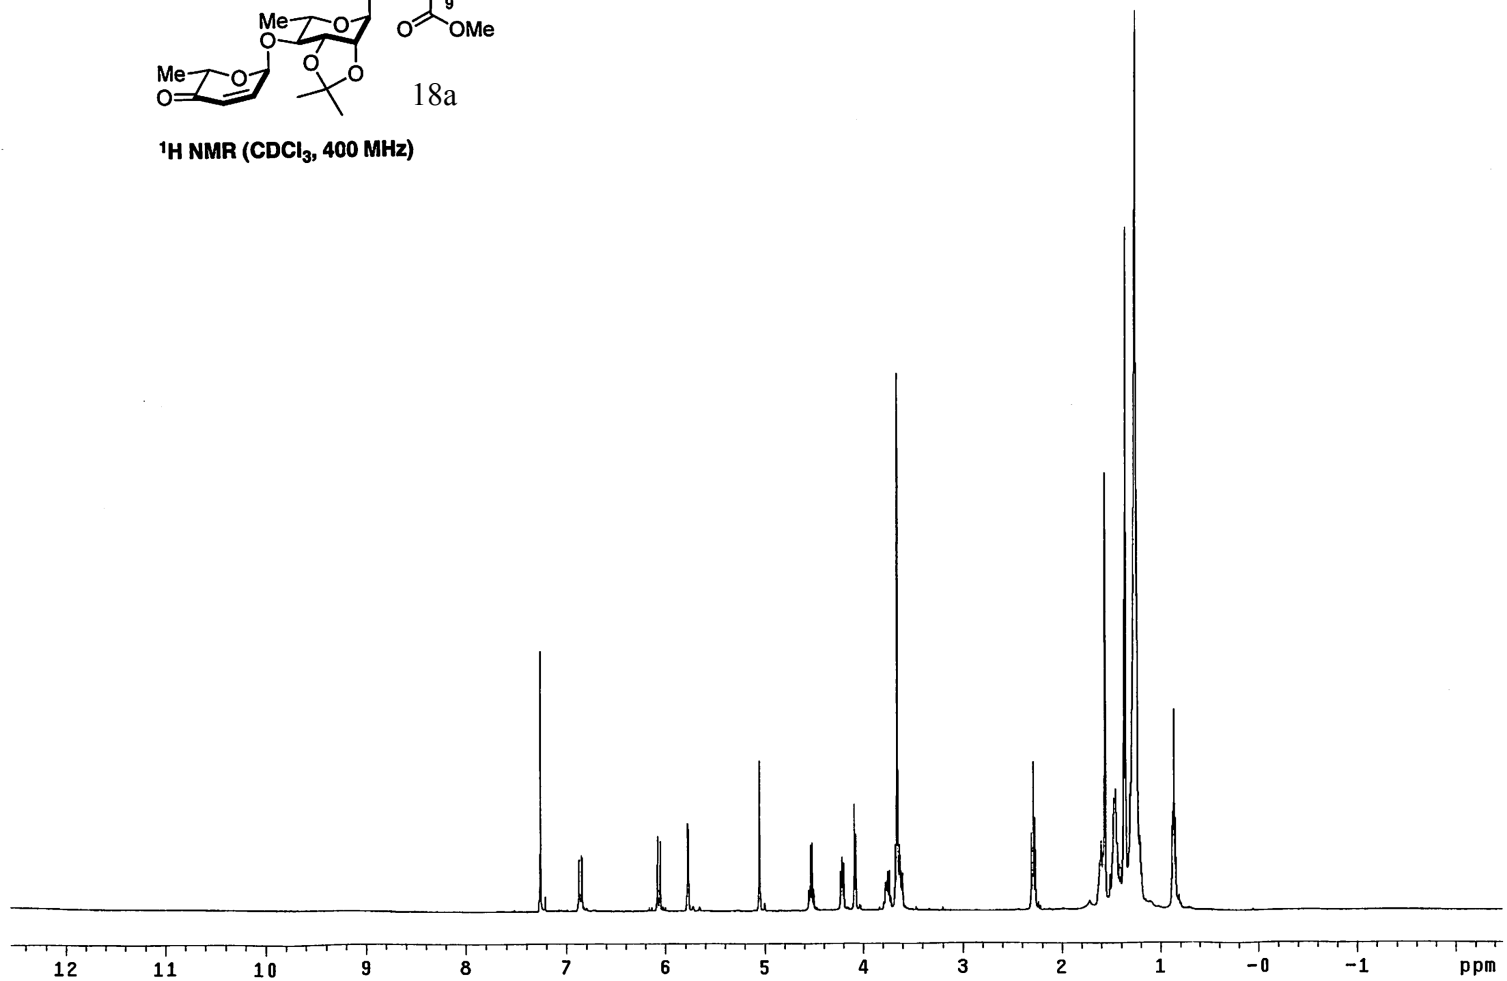

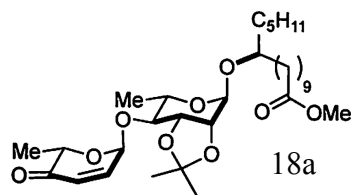

<sup>13</sup>C NMR (CDCl<sub>3</sub>, 100 MHz)

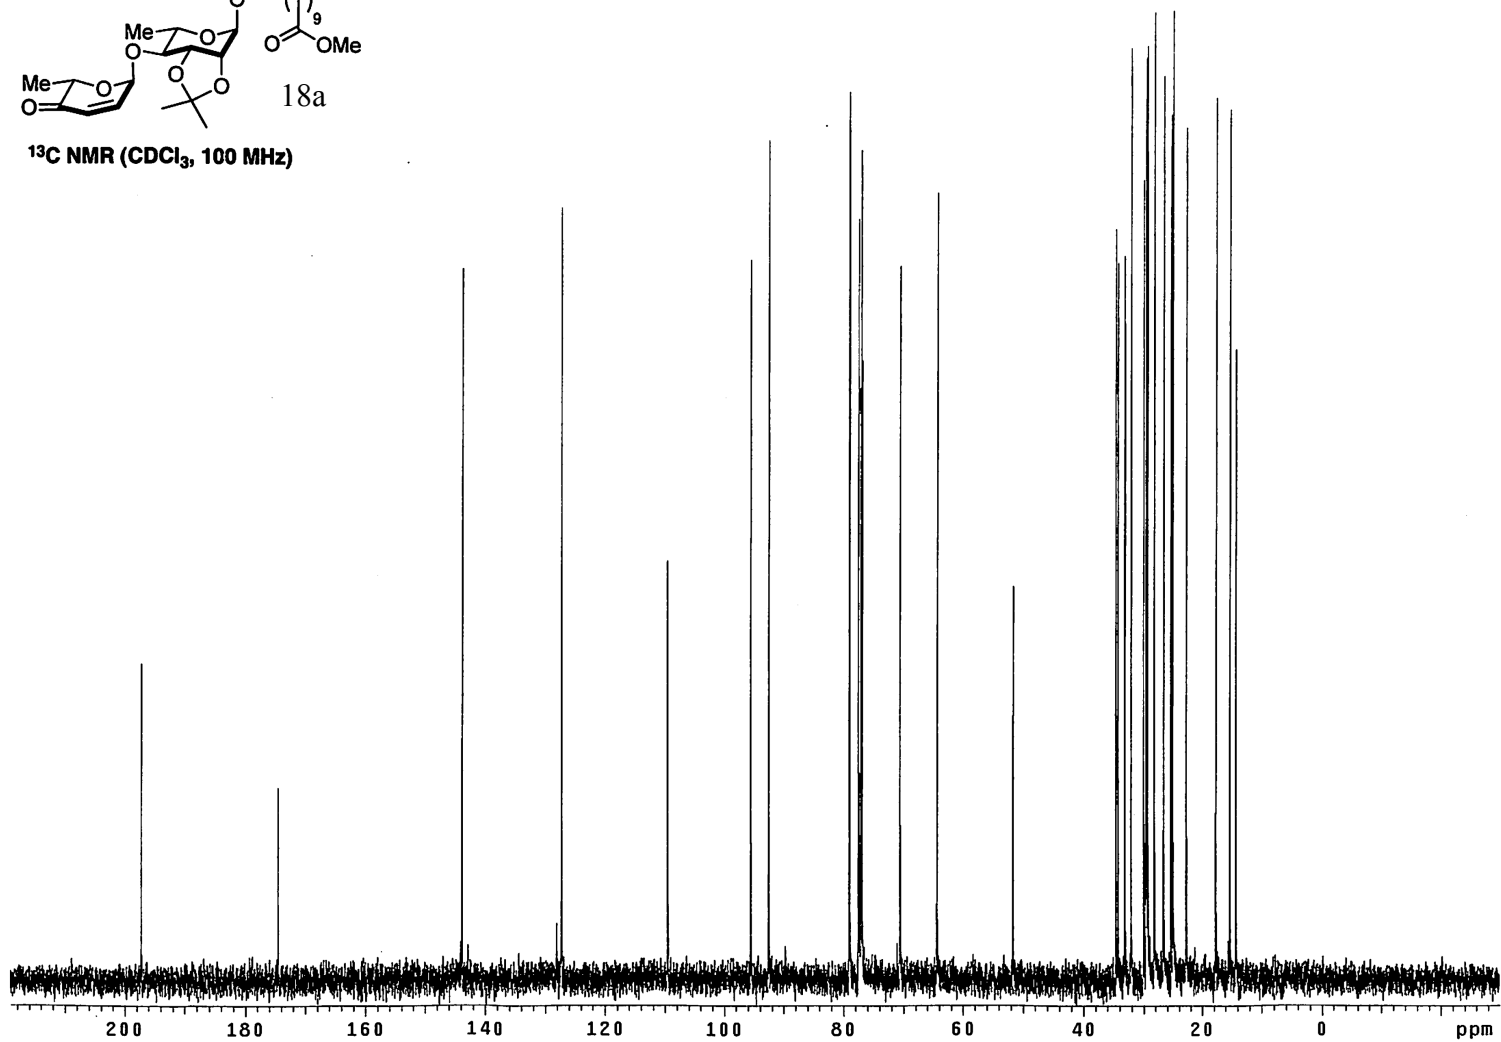

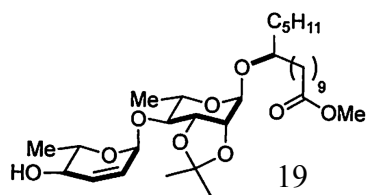

<sup>1</sup>H NMR (CDCl<sub>3</sub>, 400 MHz)

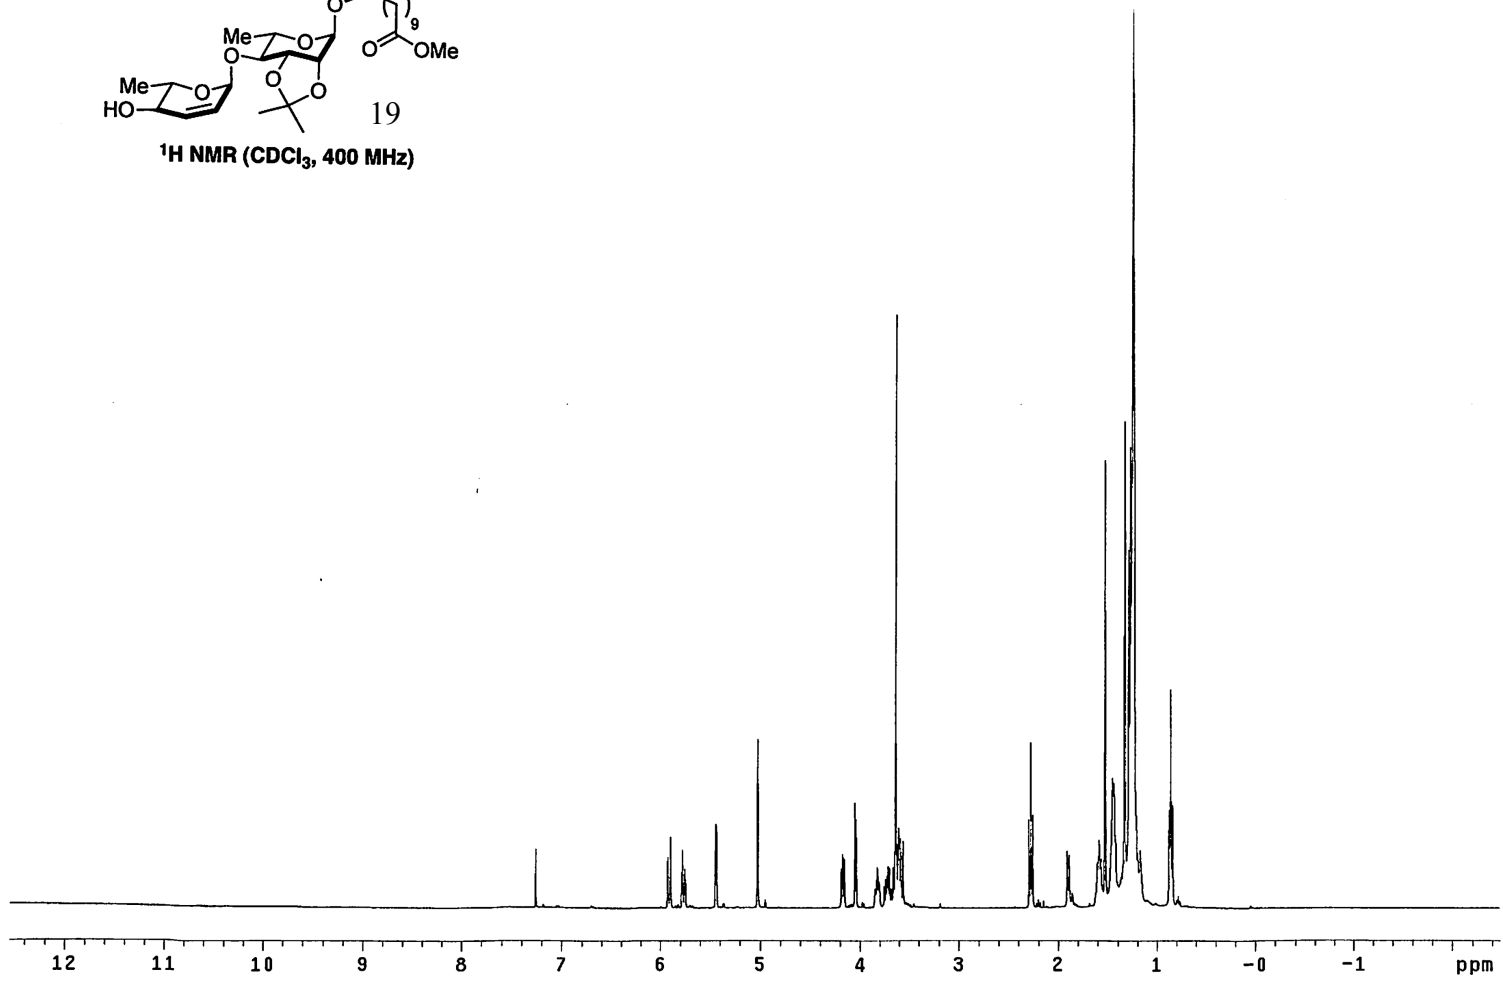

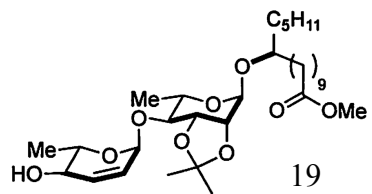

$^{13}\text{C}$  NMR ( $\text{CDCl}_3$ , 100 MHz)

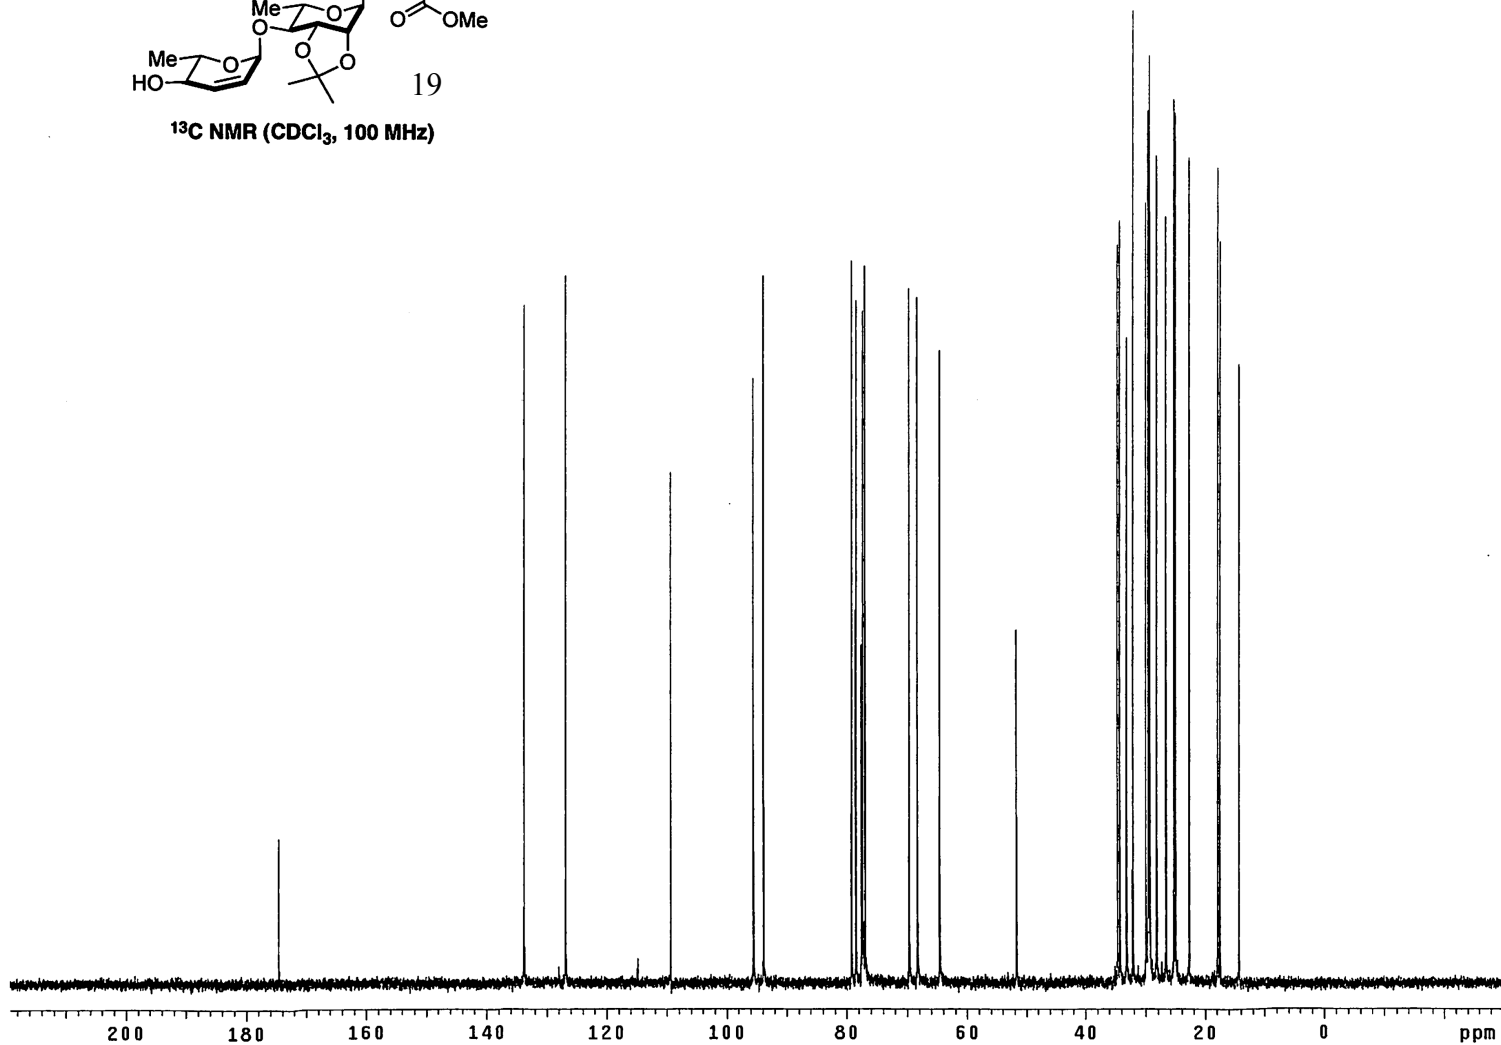



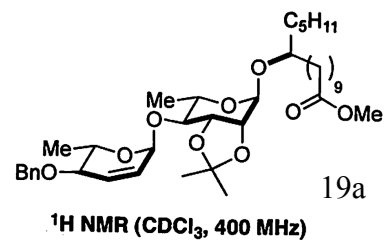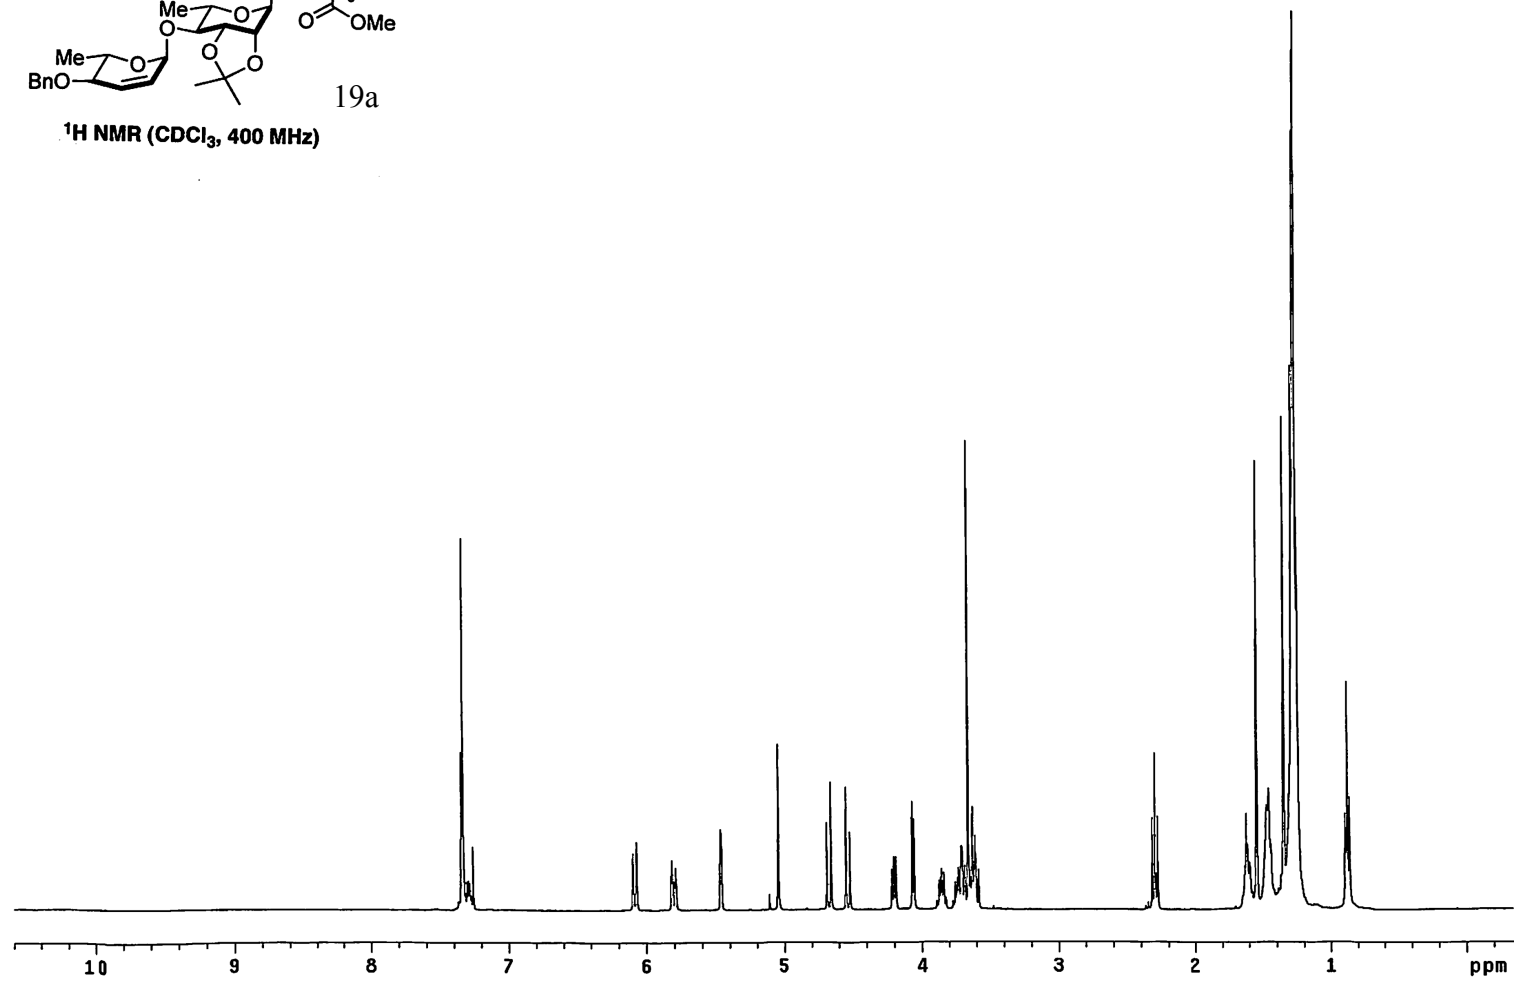

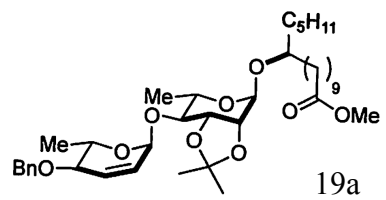

**$^{13}\text{C}$  NMR ( $\text{CDCl}_3$ , 100 MHz)**

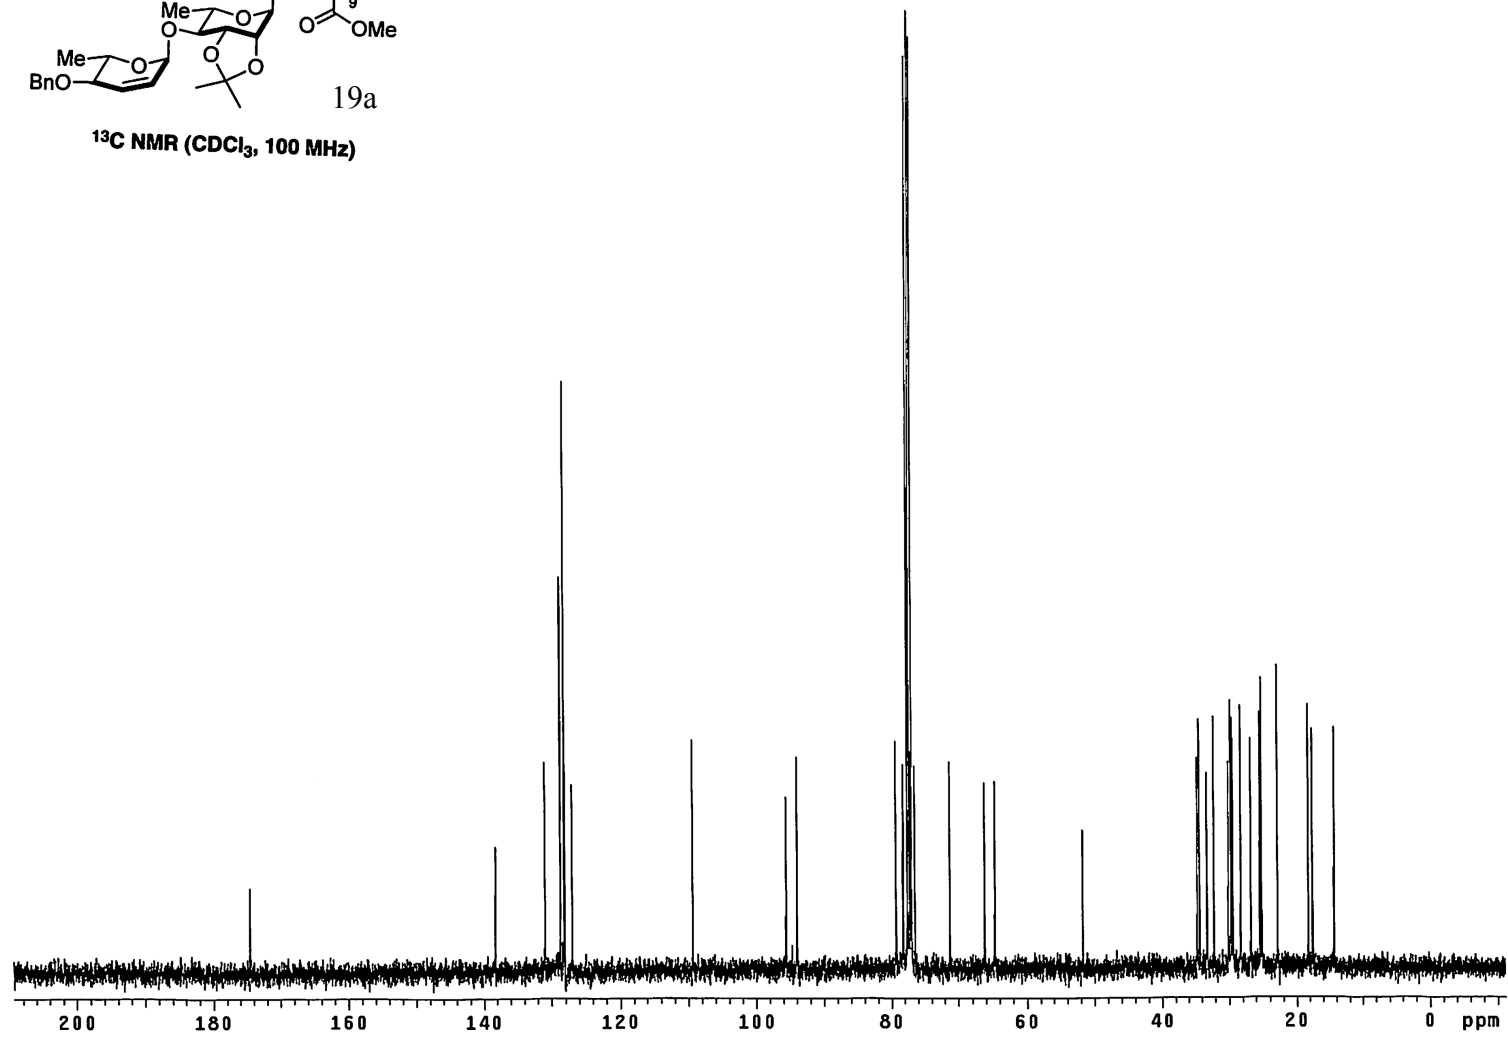

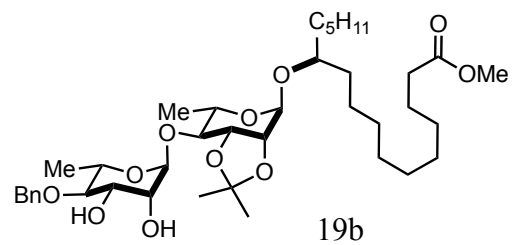

$^1\text{H NMR}$  ( $\text{CDCl}_3$ , 400 MHz)

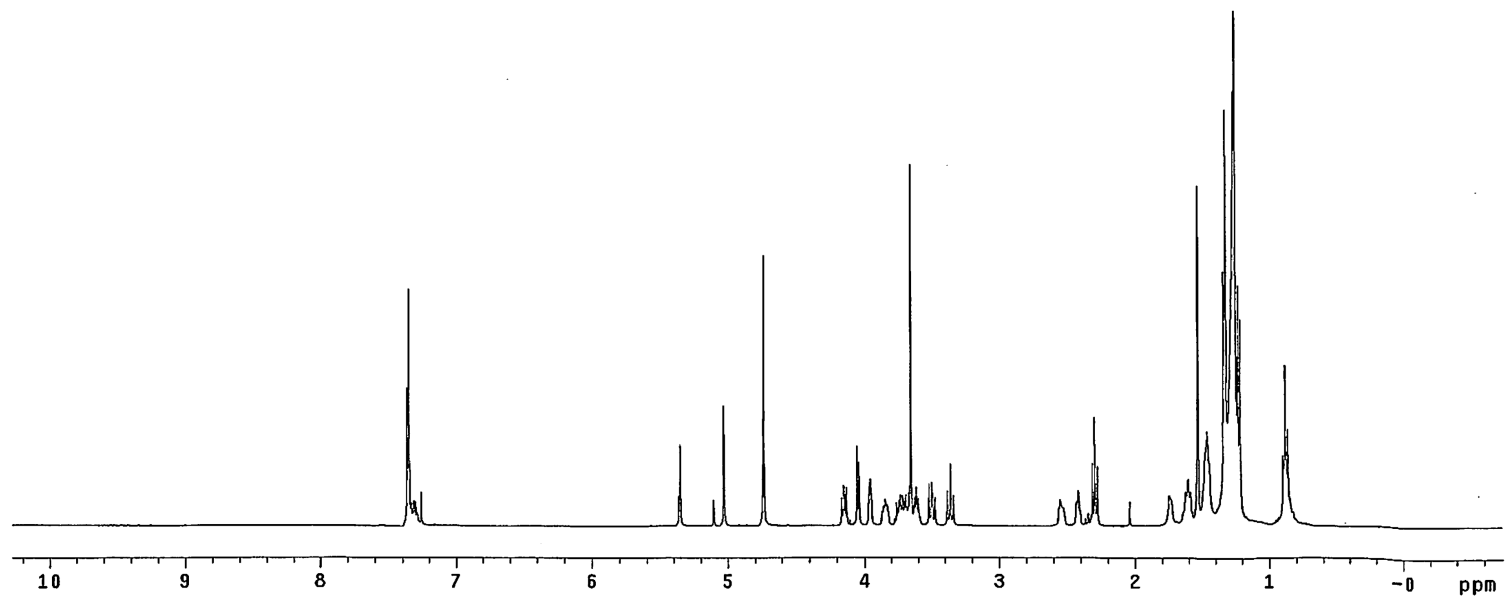

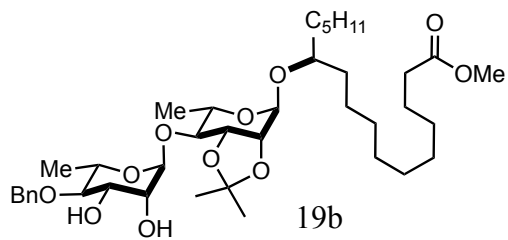

$^{13}\text{C}$  NMR ( $\text{CDCl}_3$ , 100 MHz)

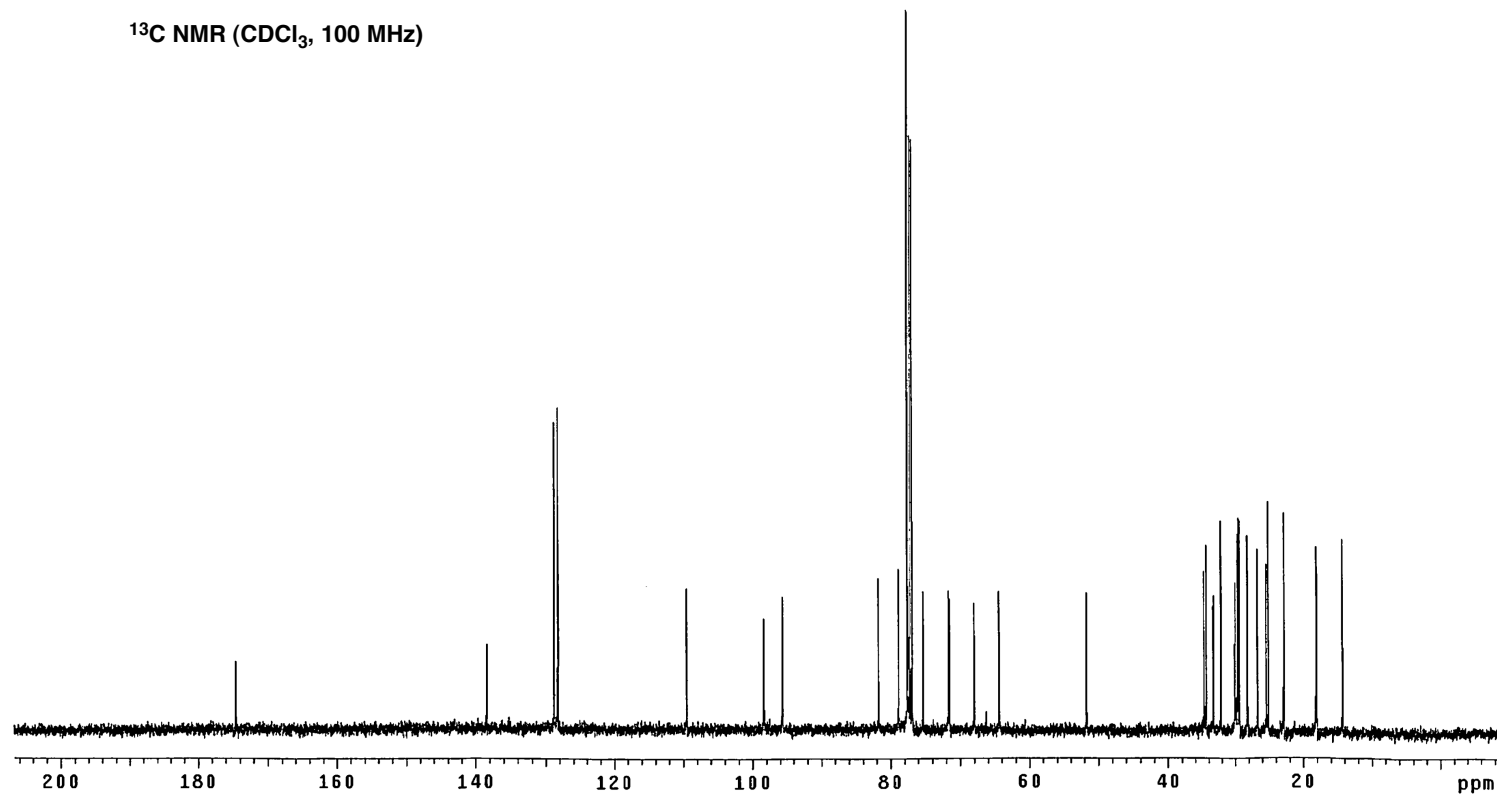

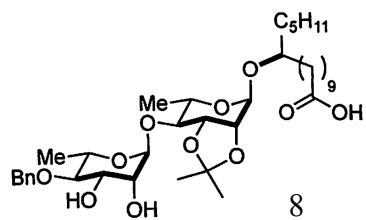

**<sup>1</sup>H NMR (CDCl<sub>3</sub>, 400 MHz)**

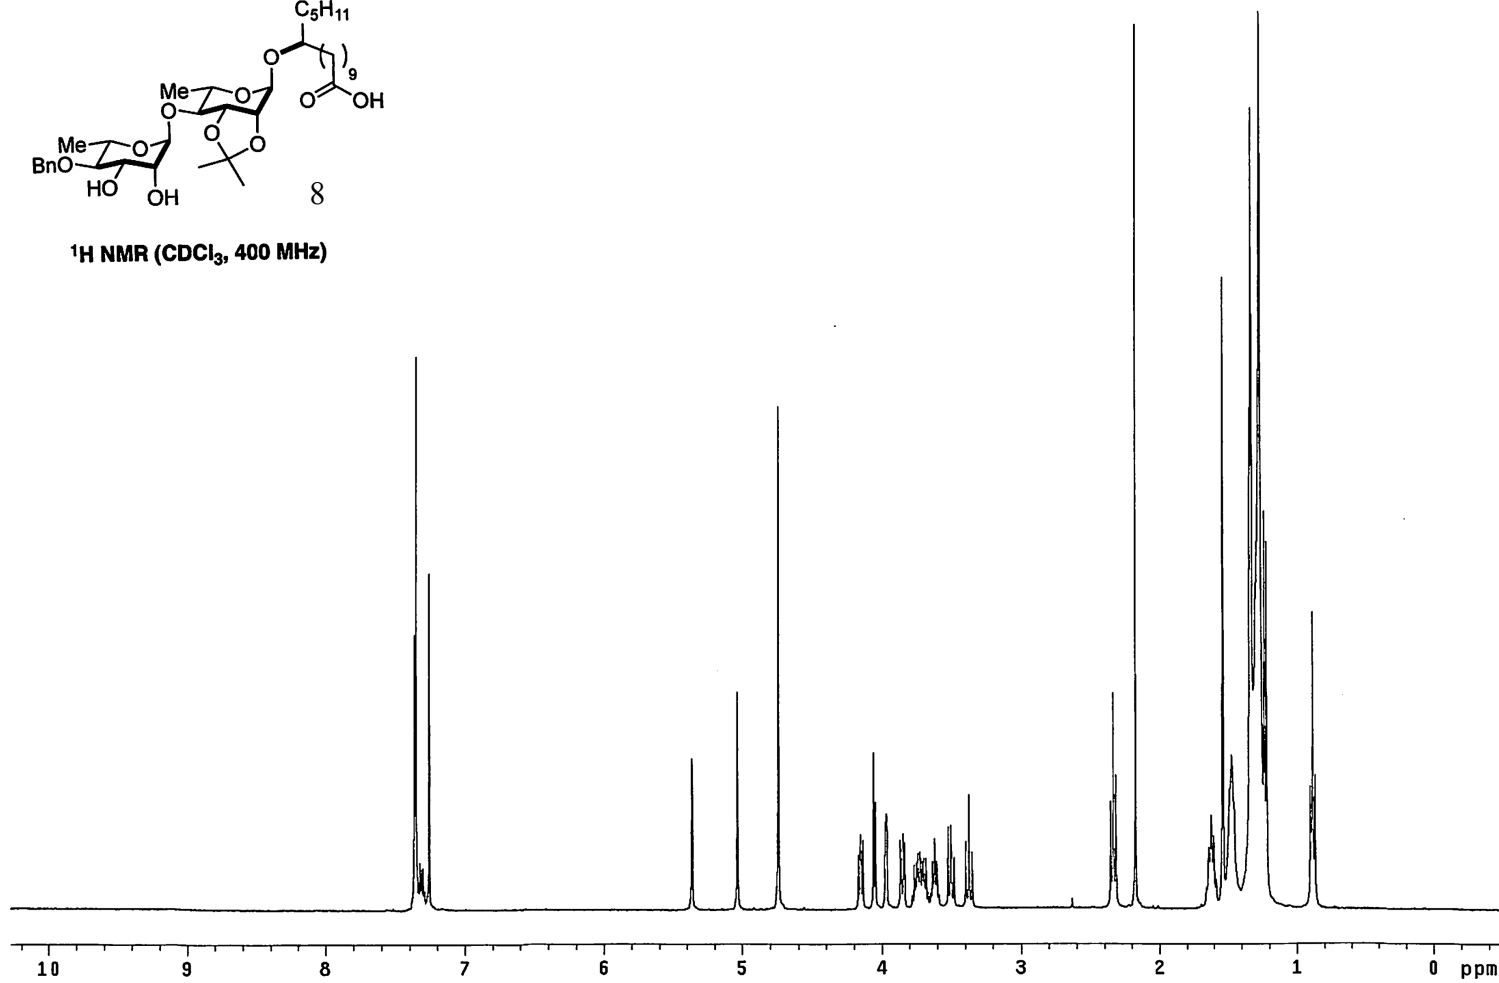

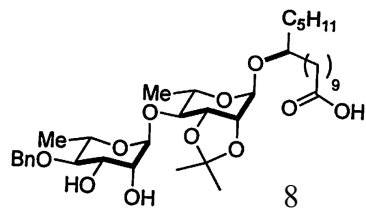

**<sup>13</sup>C NMR (CDCl<sub>3</sub>, 100 MHz)**

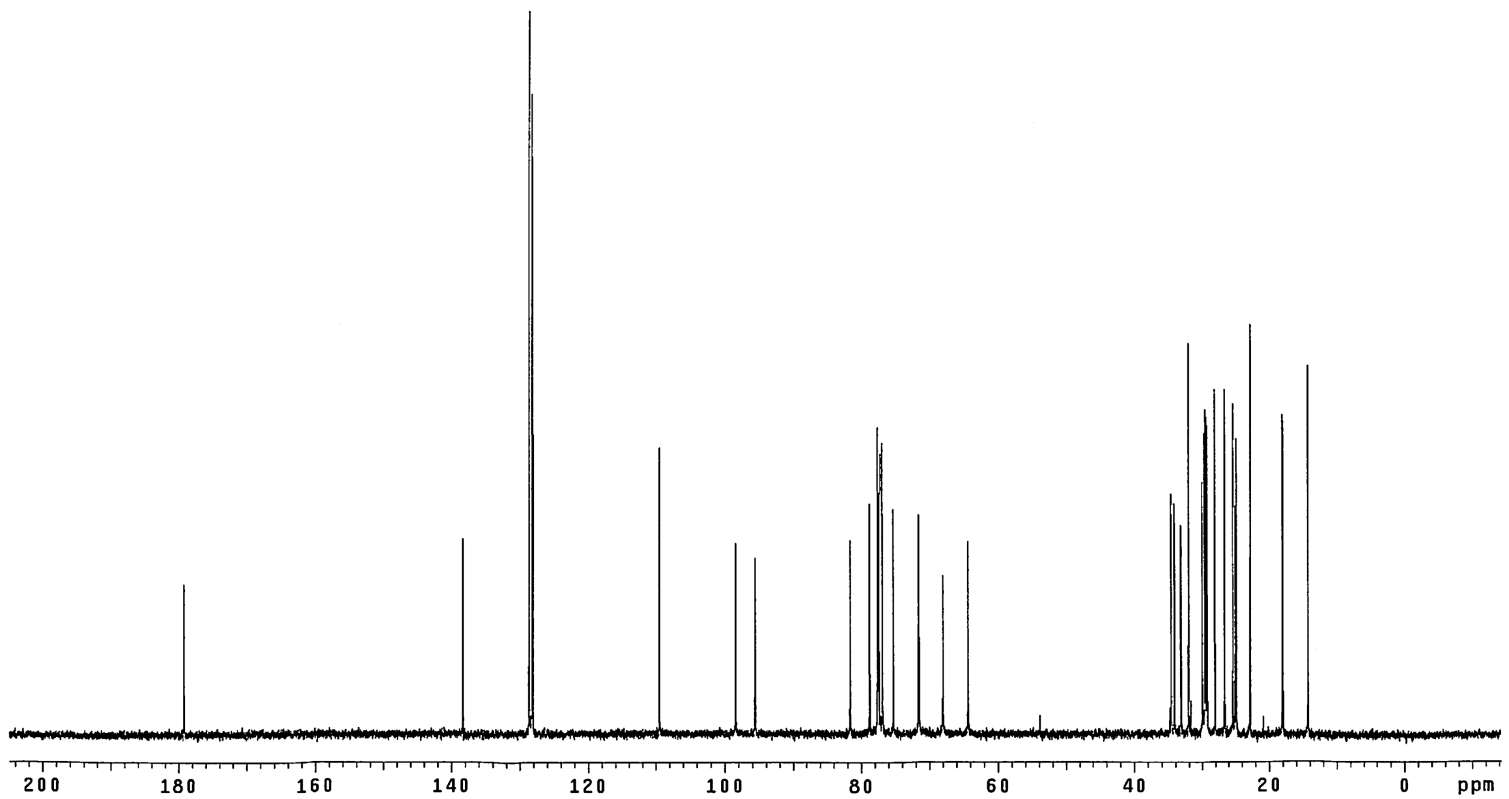

Complete assignments were performed in CDCl<sub>3</sub>, 600 MHz

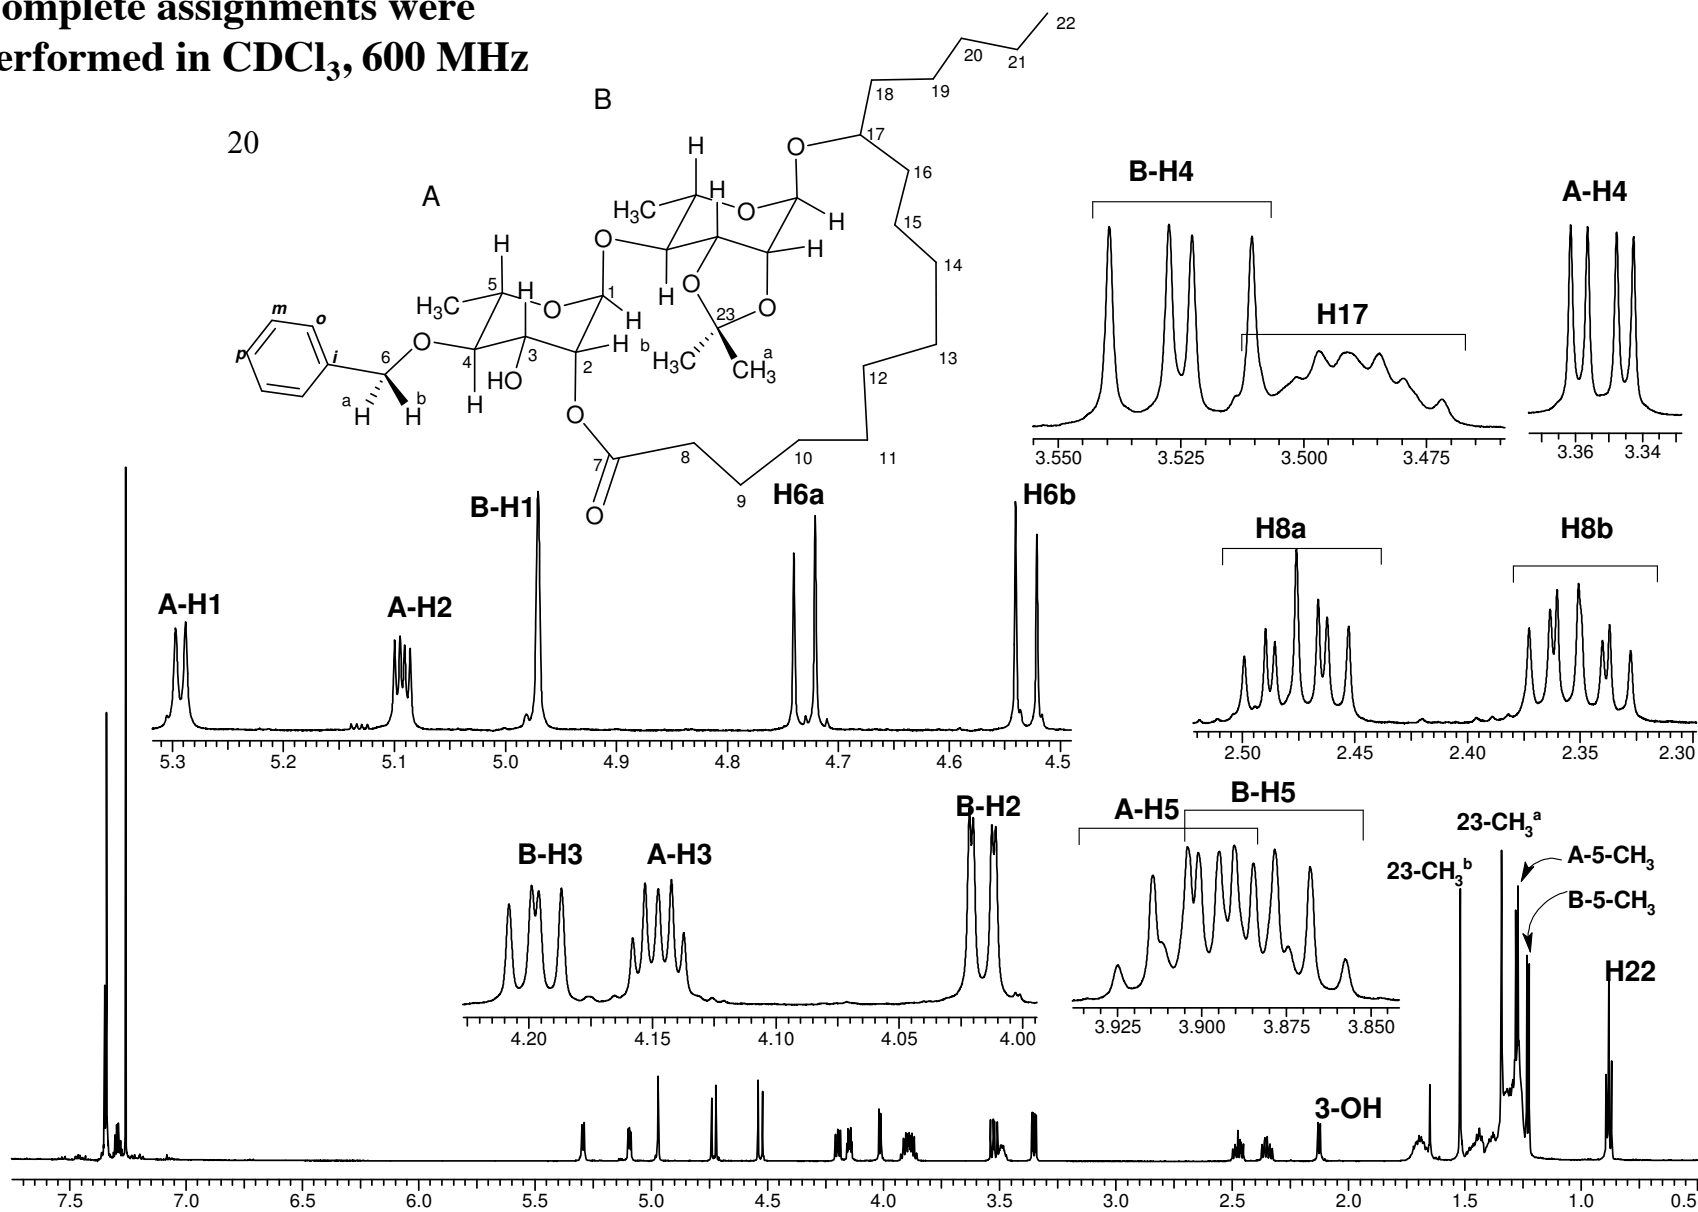

**1D TOCSY spectrum:** (a) selective excitation of A-CH<sub>3</sub> at 1.23 ppm  
(mix = 150 ms)

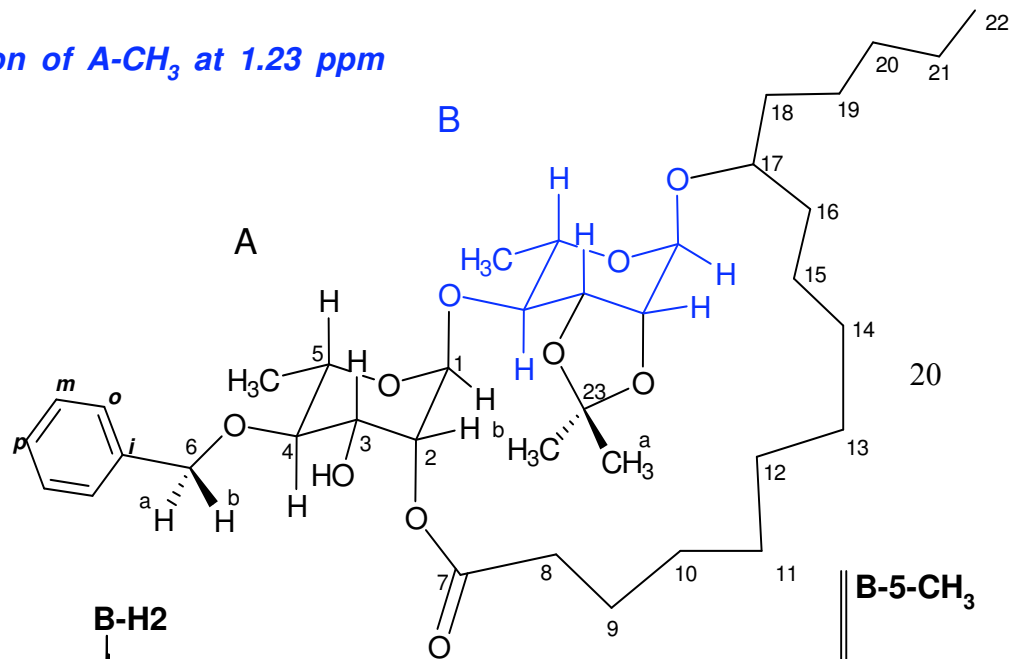

(a)

B-H1

B-H3

B-H2

B-H5

B-H4

B-5-CH<sub>3</sub>

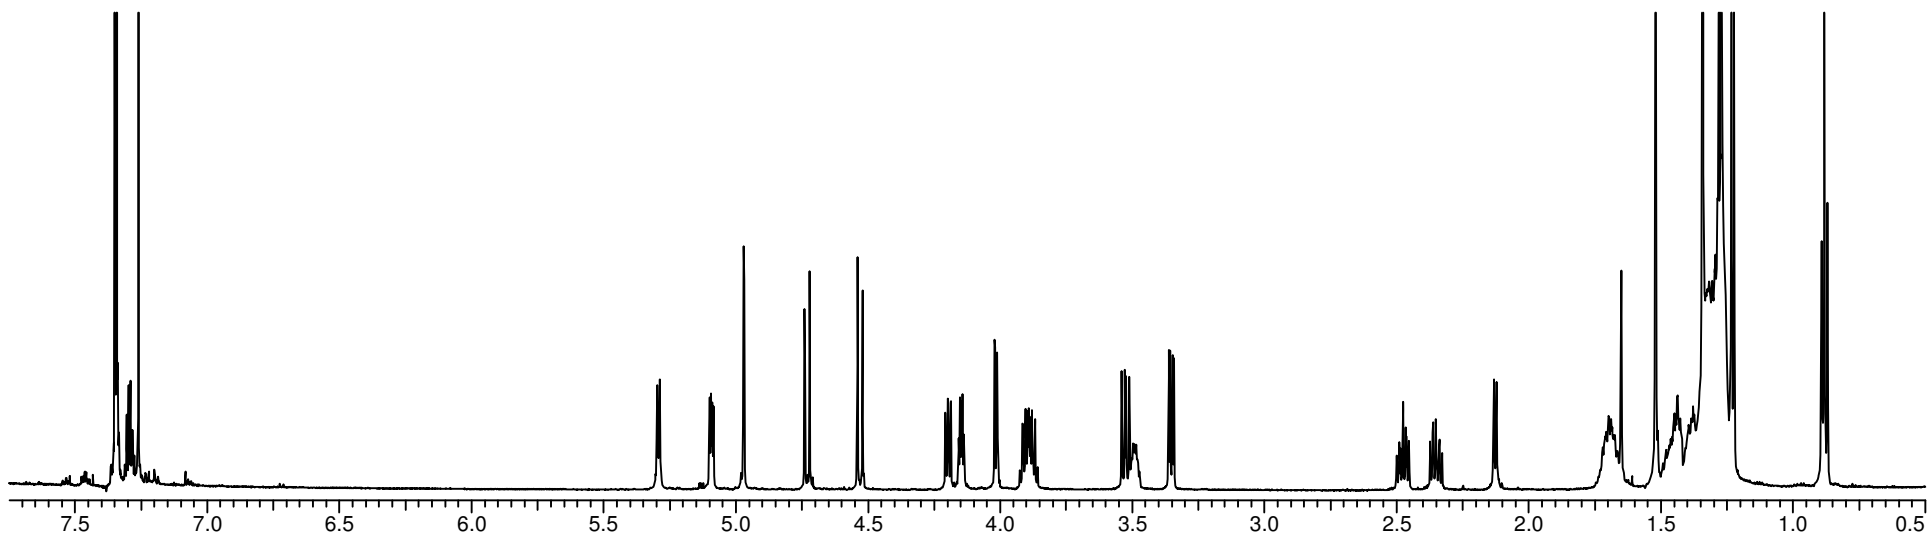



**1D TOCSY spectra:** (a) selective excitation of A-H2;  
(b) selective excitation of A-CH<sub>3</sub> at 1.28 ppm (mix = 150 ms)

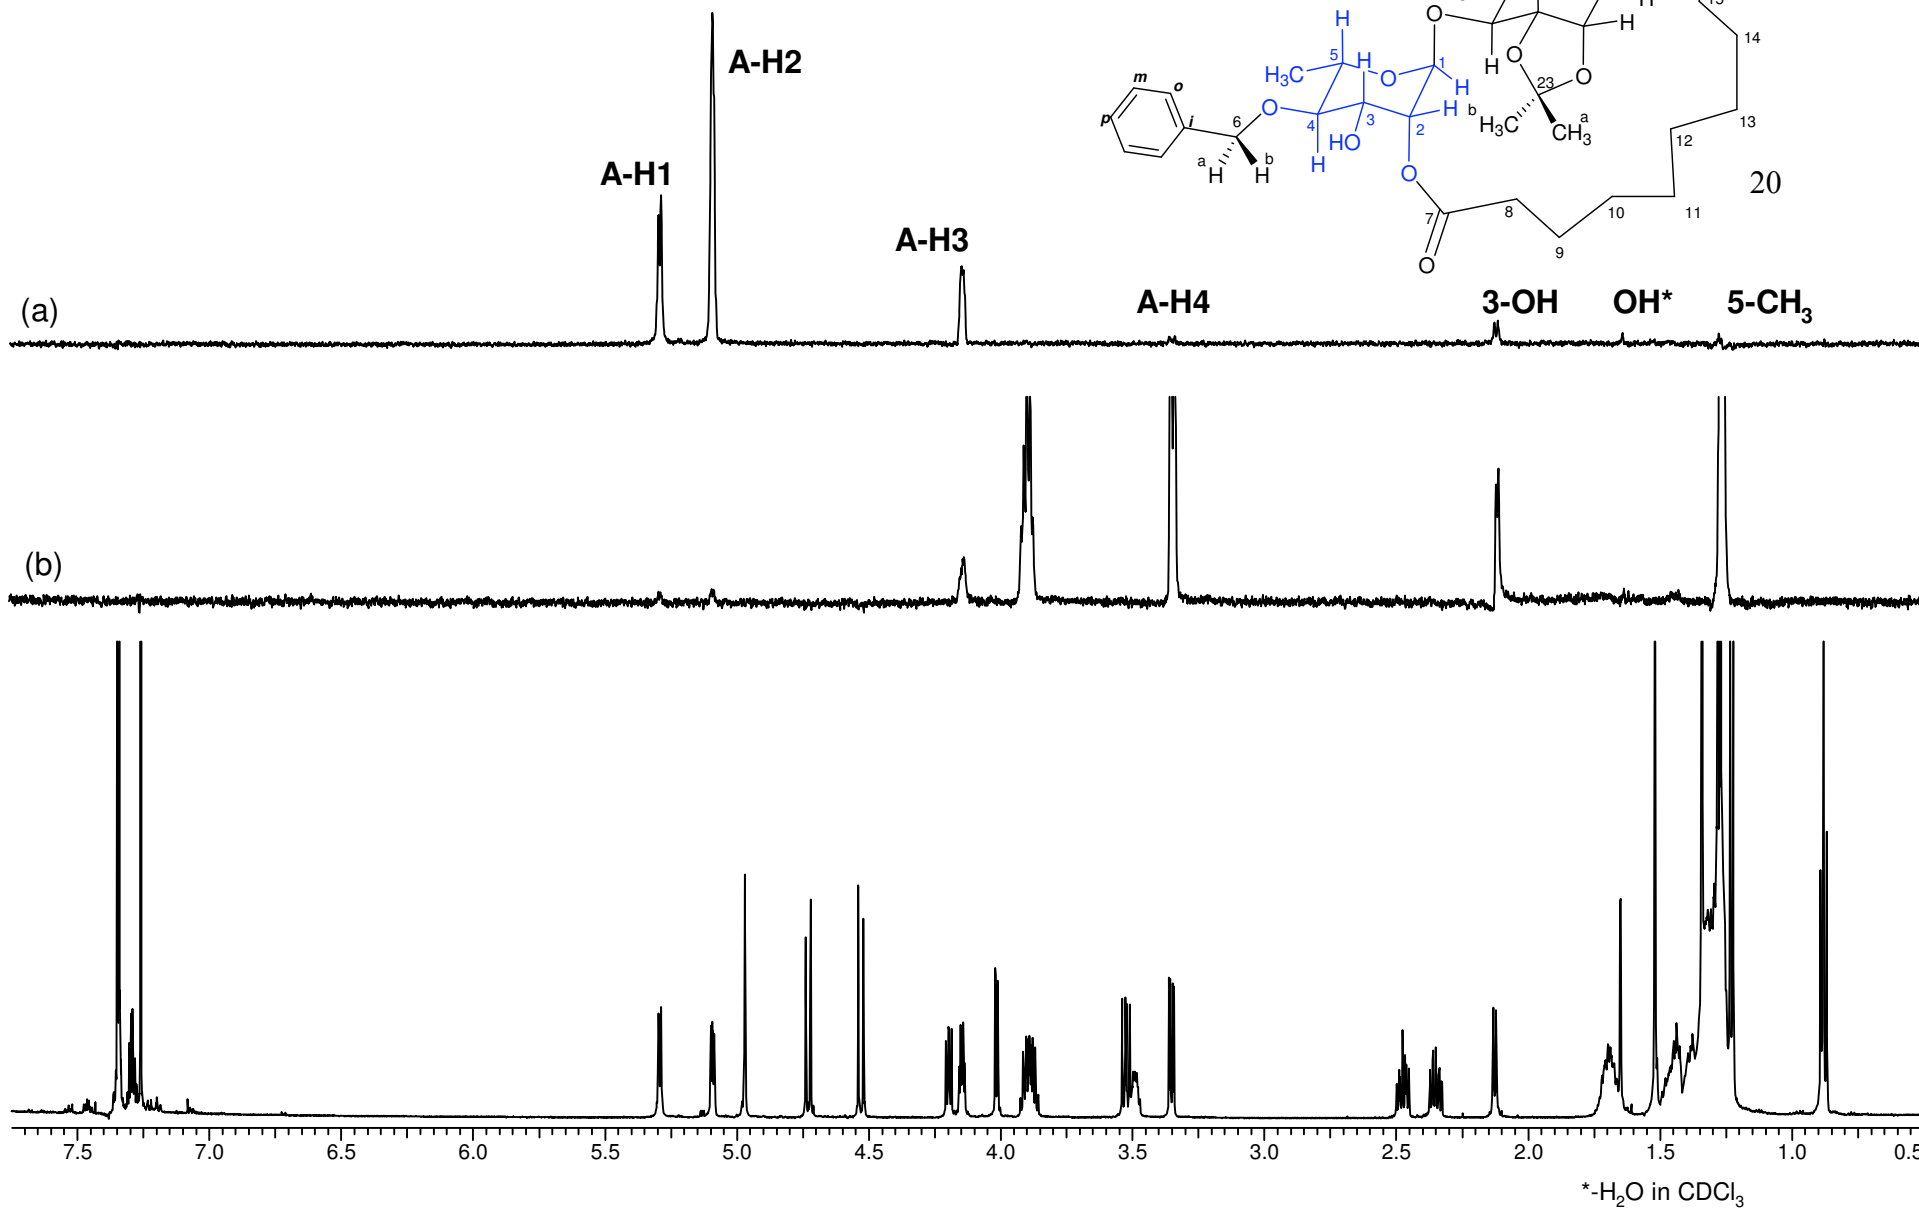

# 1D TOCSY spectrum Spin system identification

Selective excitation of H5 at 3.90 ppm for both A and B-sugar moieties (mix = 150 ms)

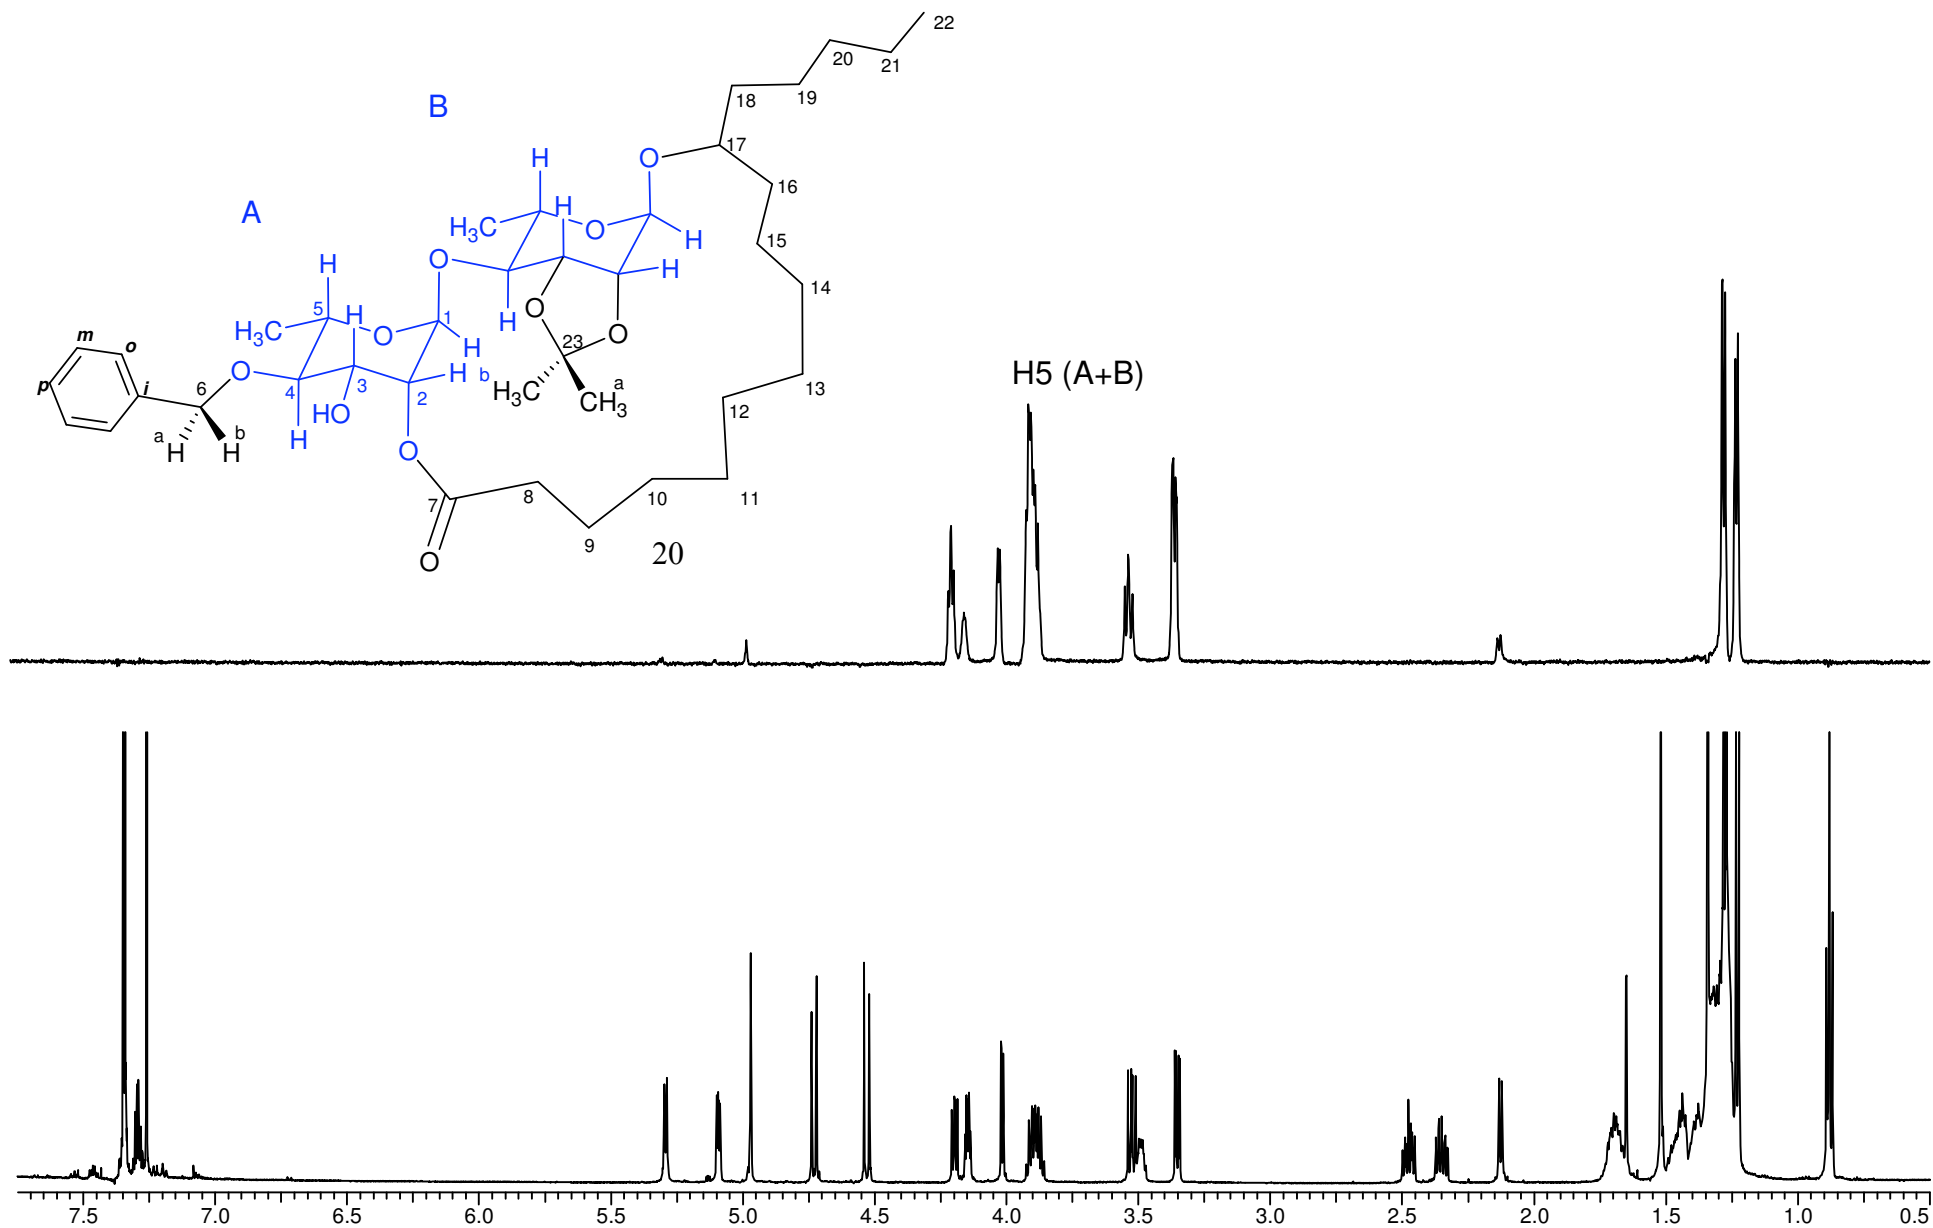

# 1D TOCSY spectrum Spin system identification

Selective excitation of H8a (mix = 150 ms)

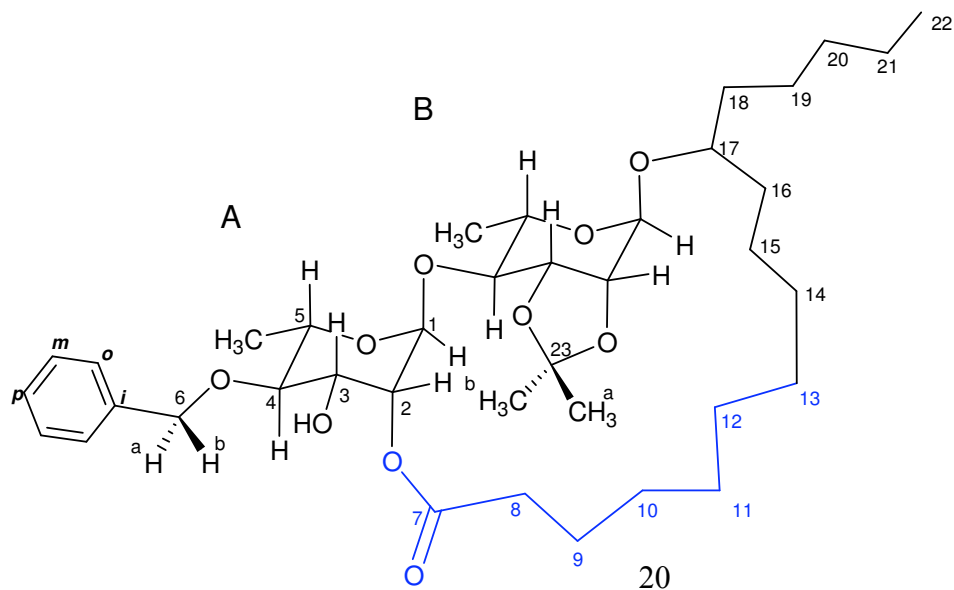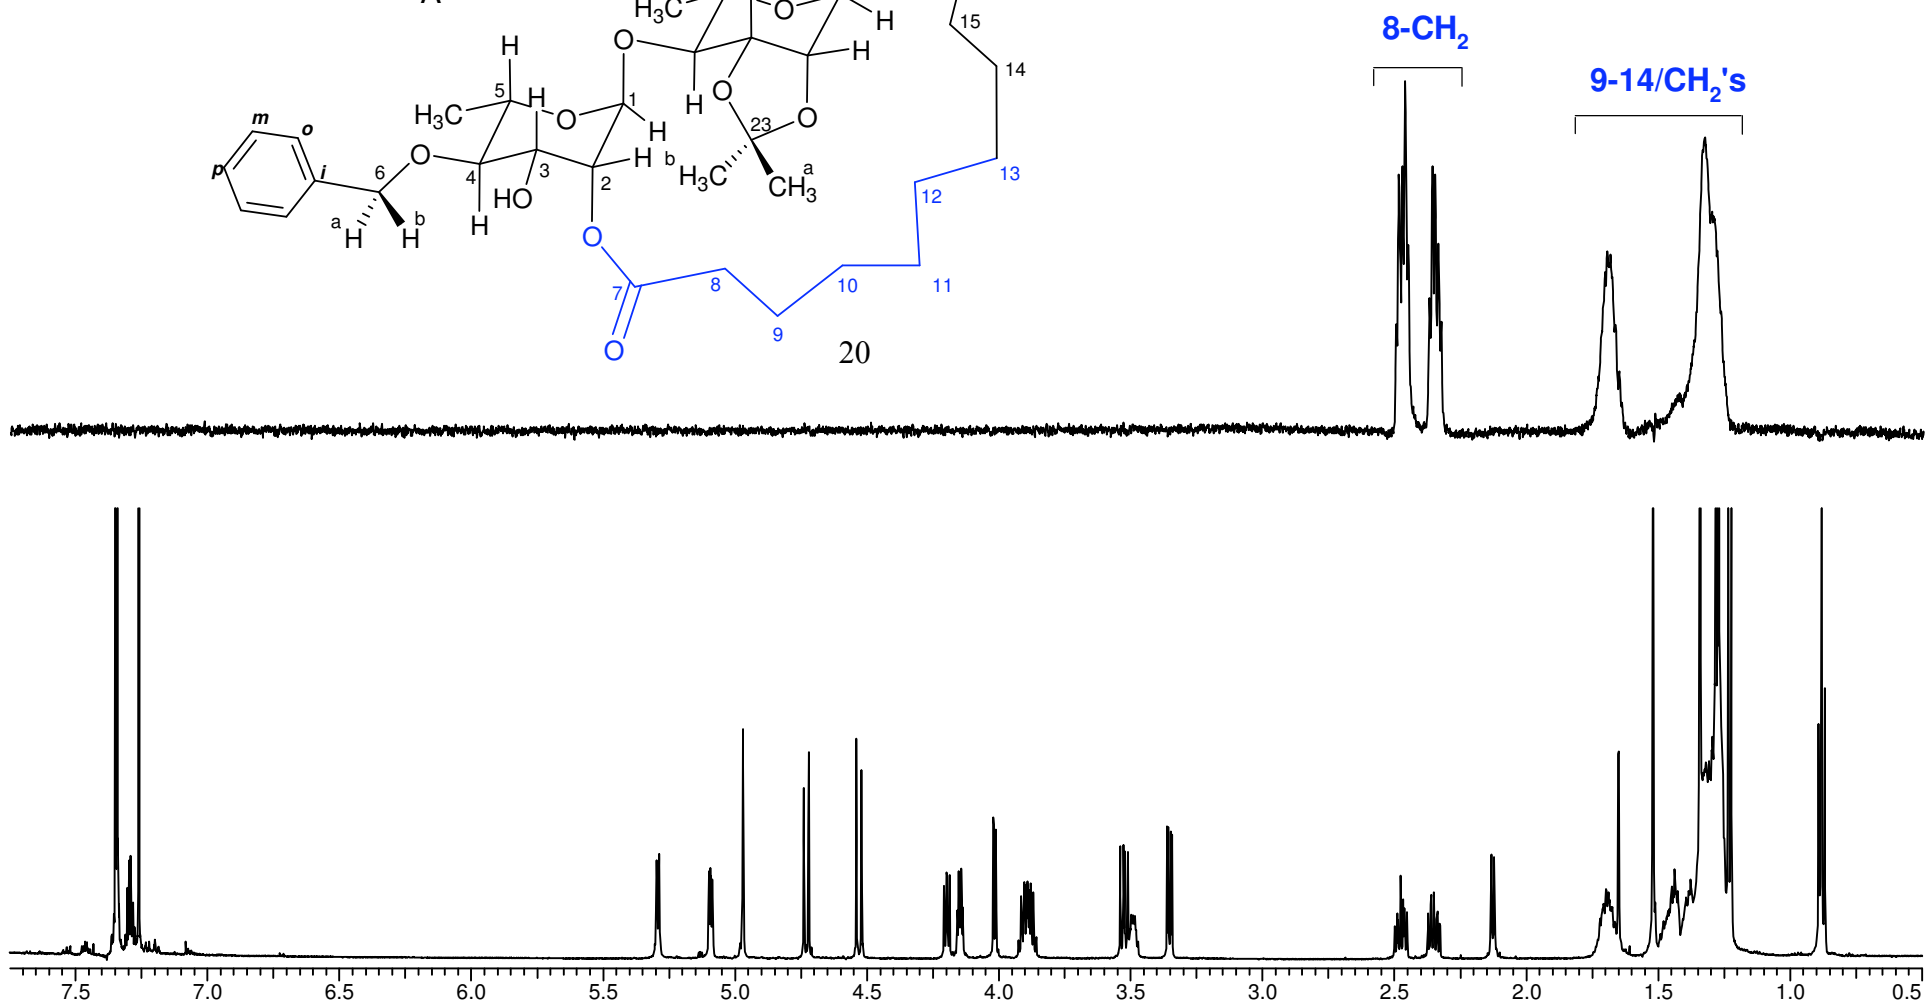

# 1D TOCSY spectrum Spin system identification

Selective excitation of H22  
(mix = 150 ms)

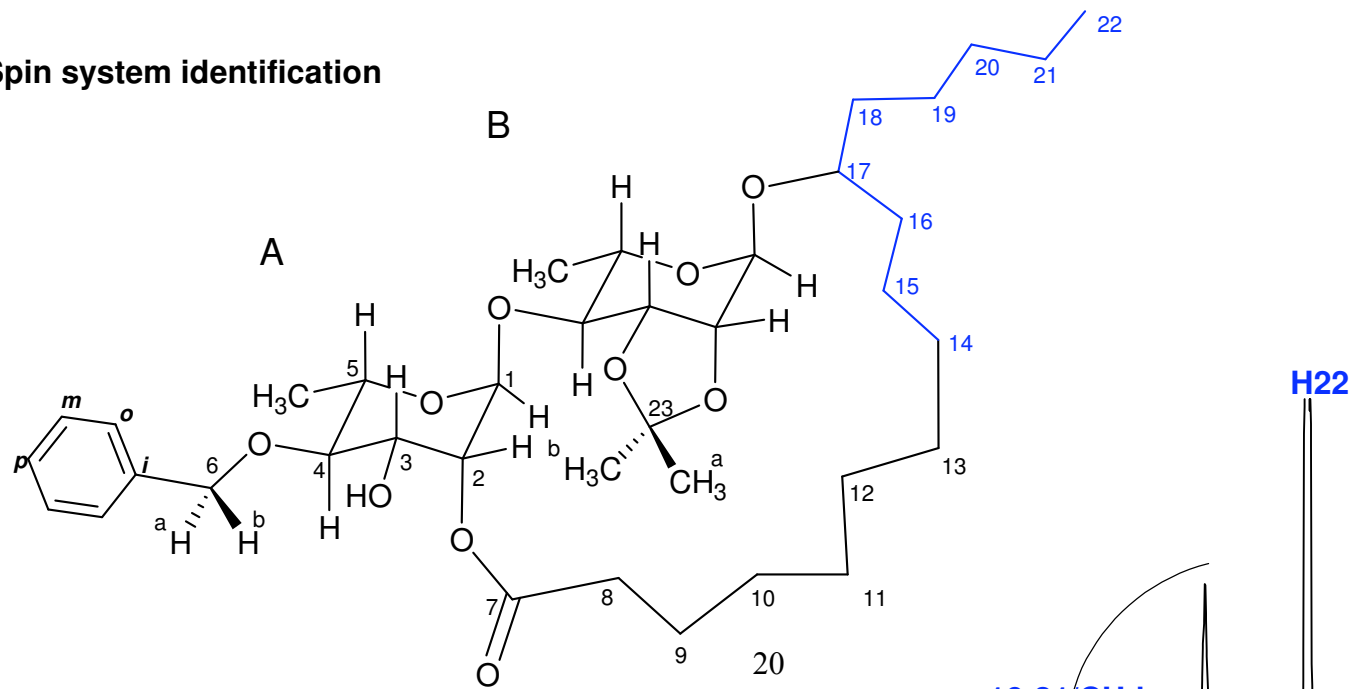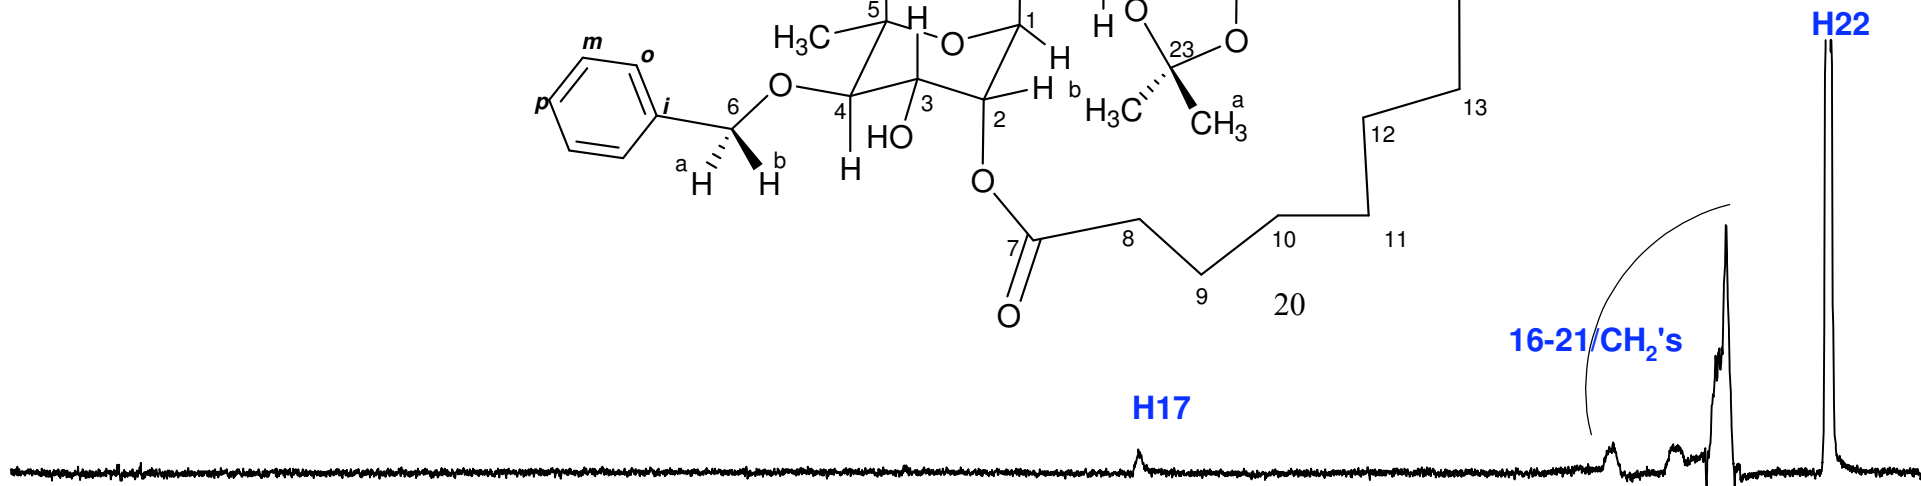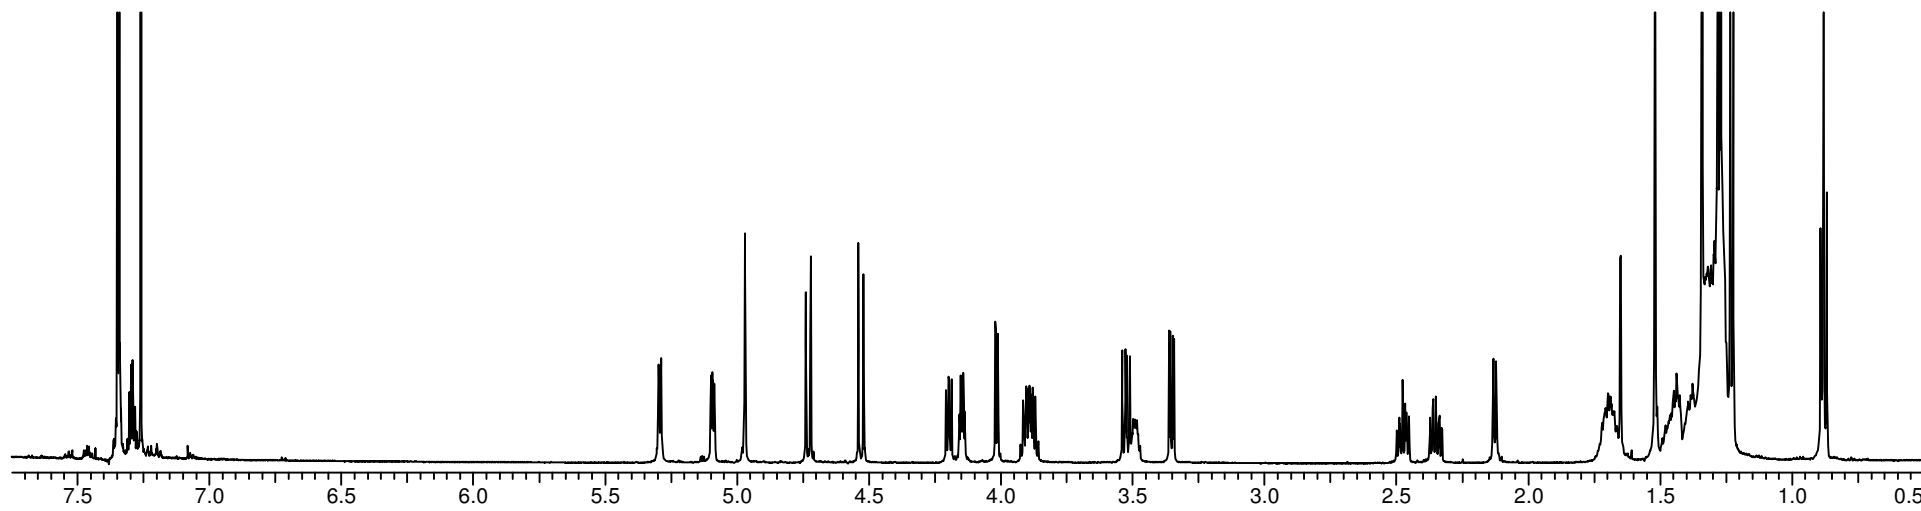

Experimental (a) and calculated (b) splitting patterns for the protons of the A-sugar moiety

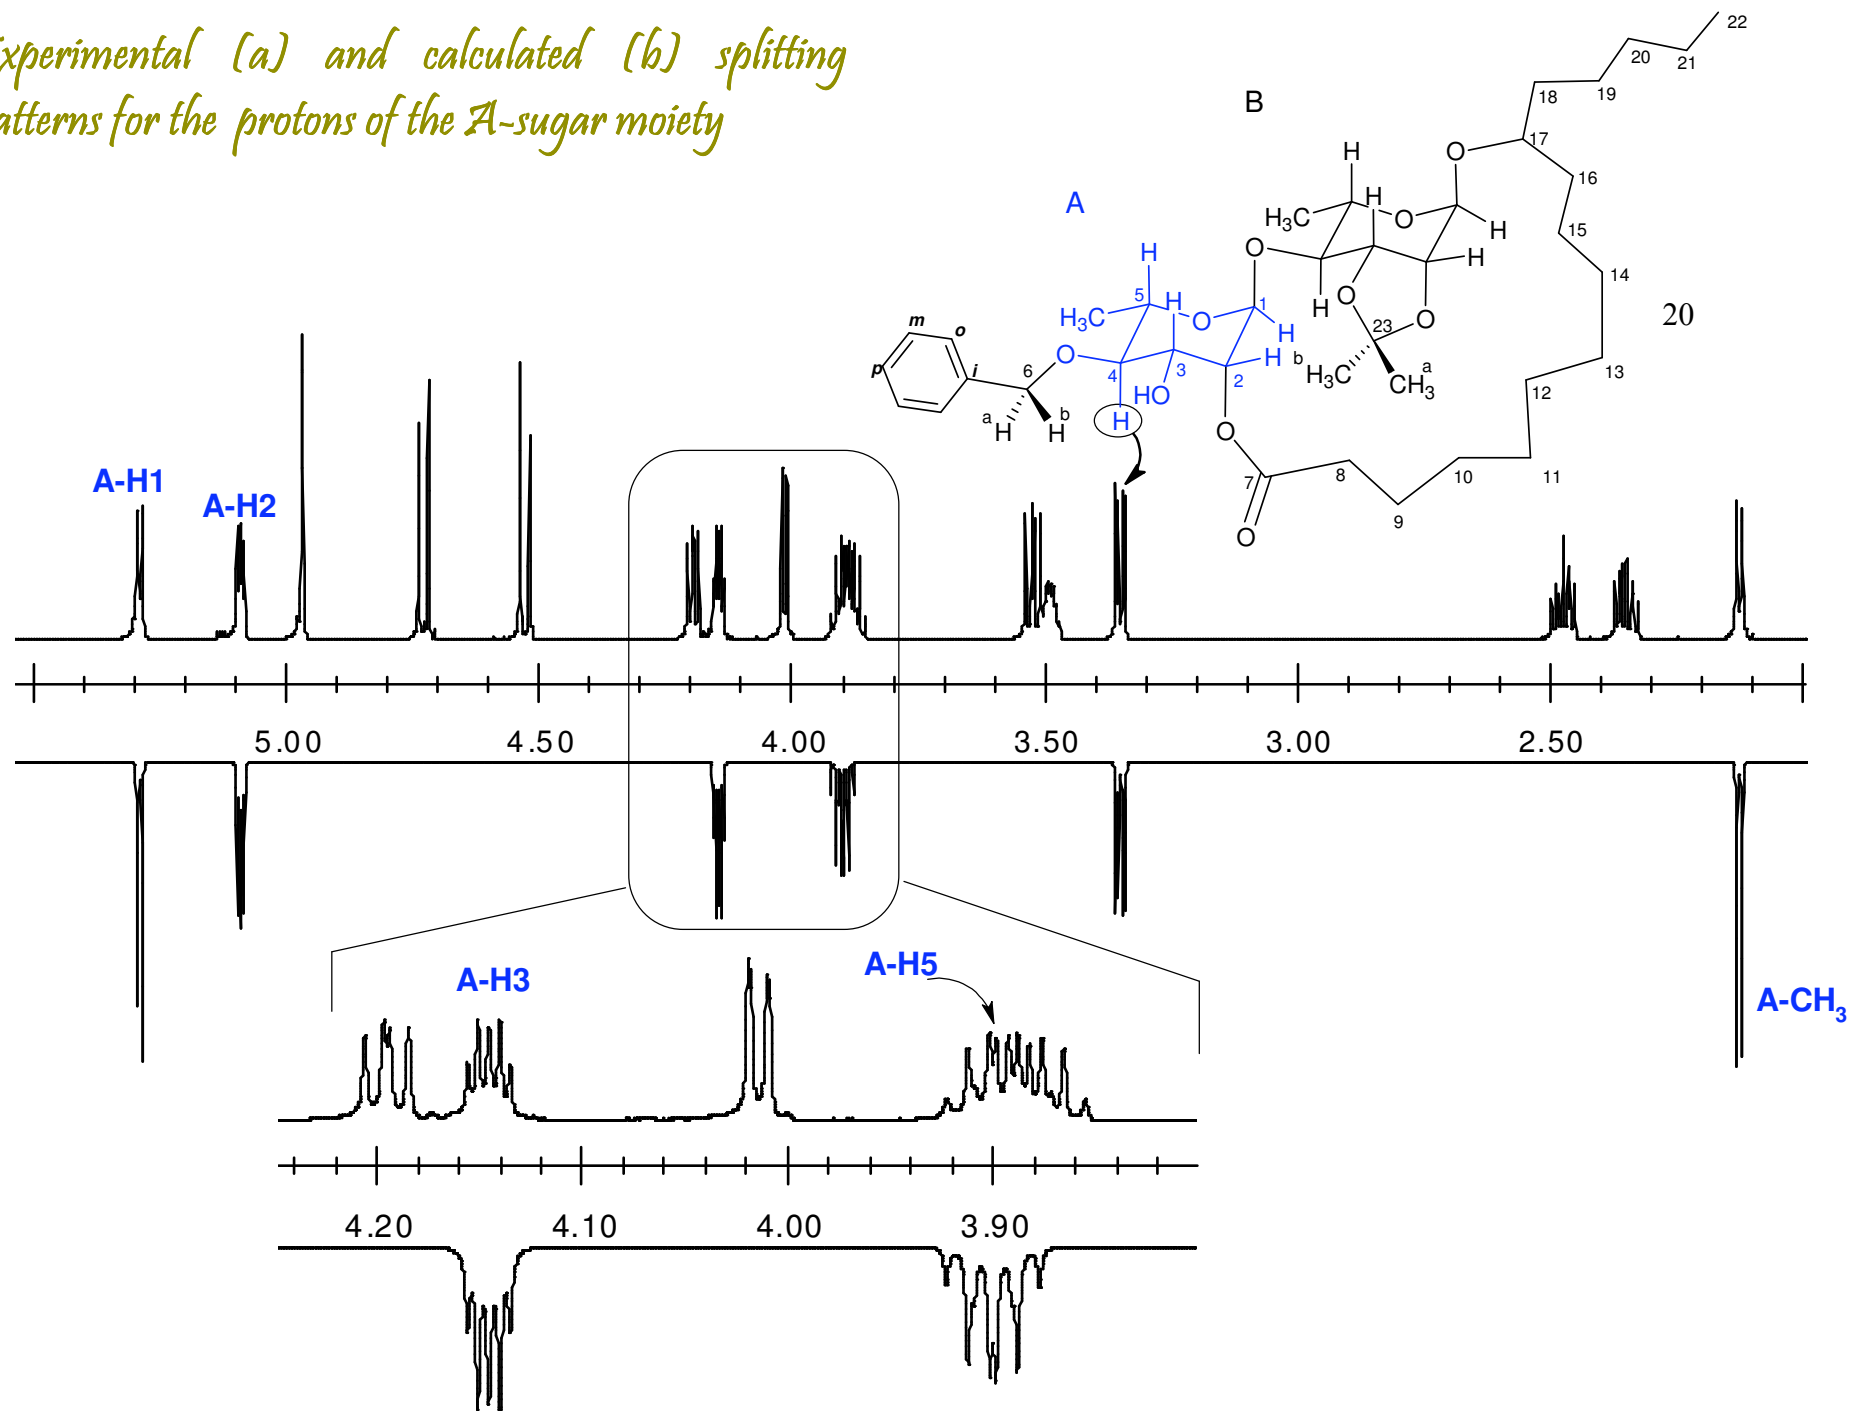

Experimental (a) and calculated (b) splitting patterns for the protons of the B-sugar moiety

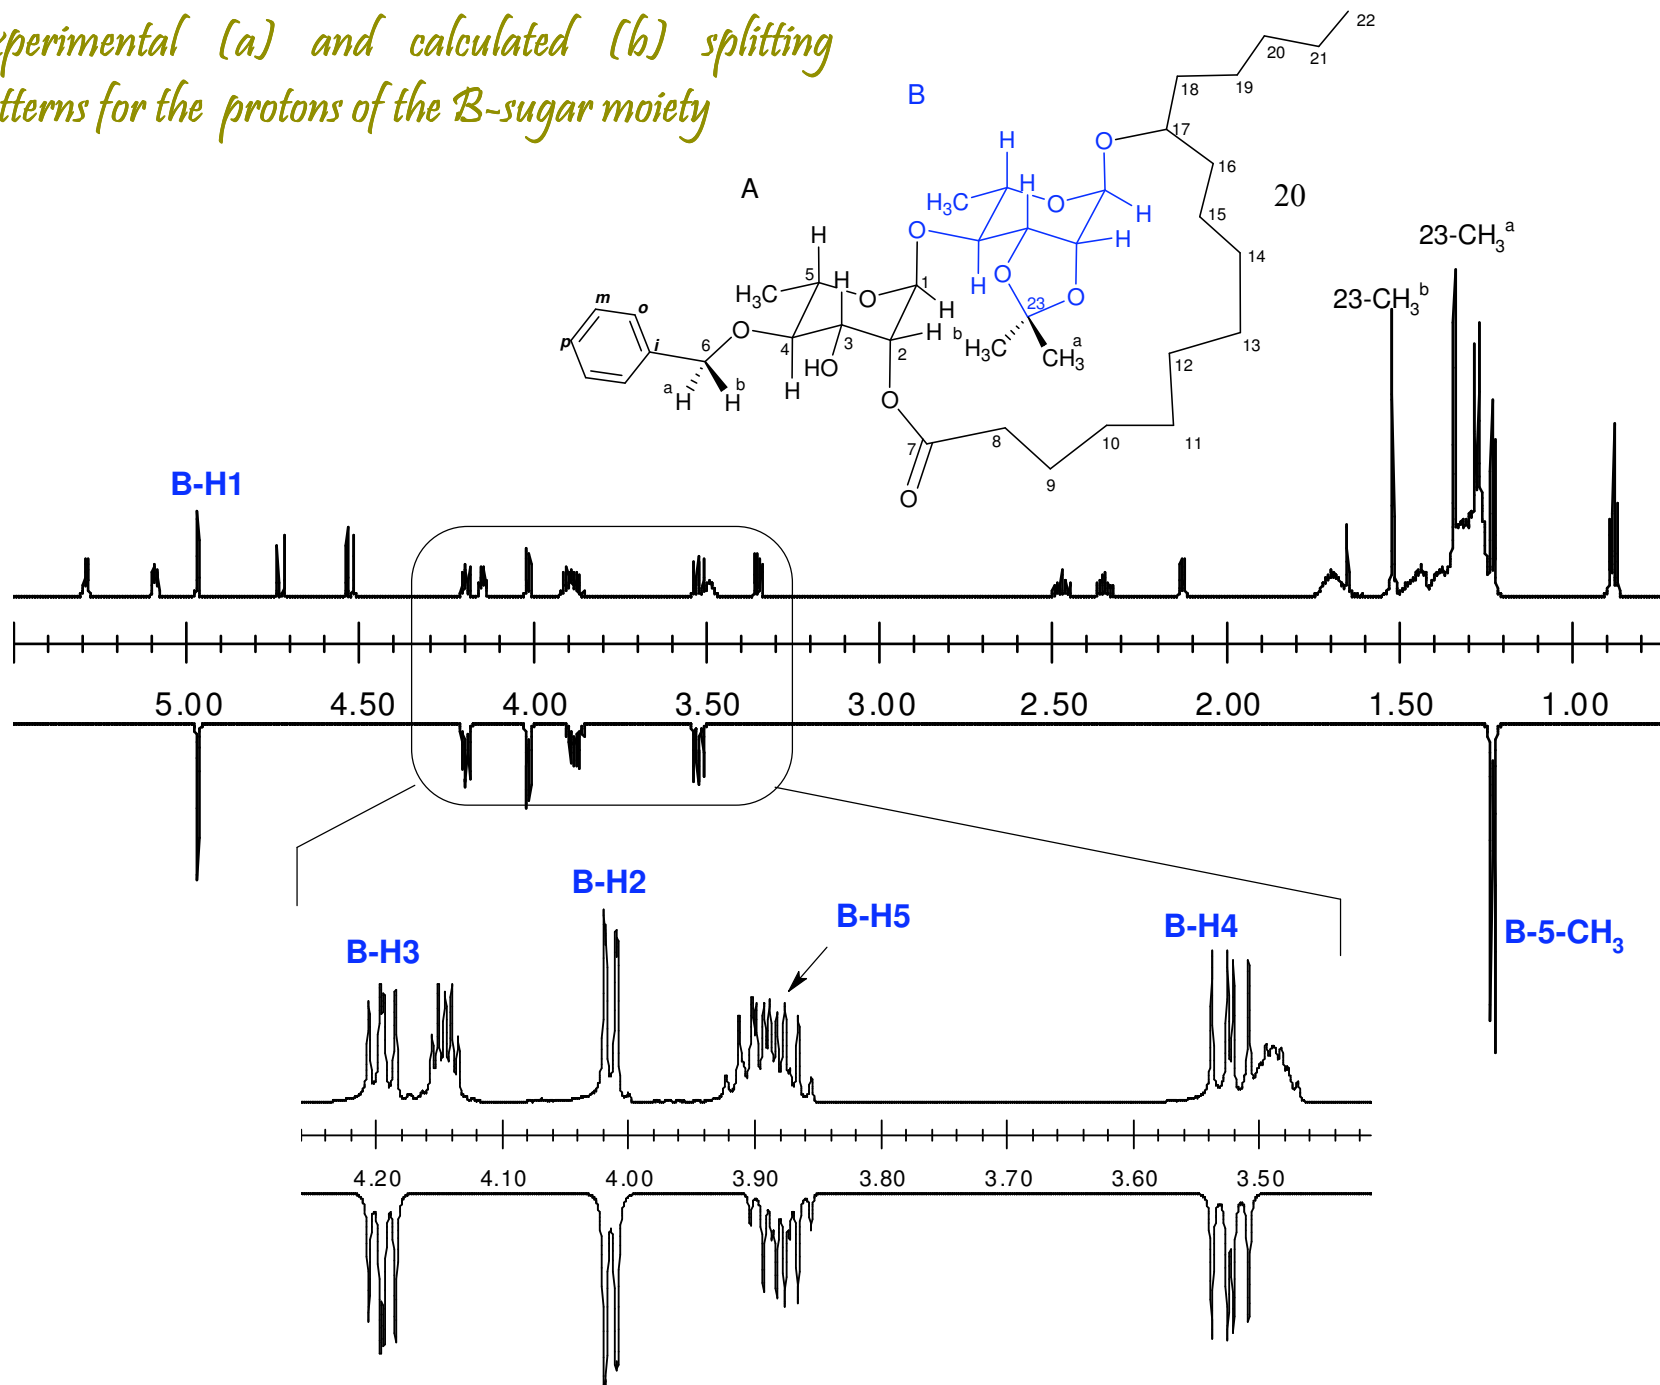

Experimental (a) and calculated (b) splitting patterns for the methylene protons of the 8-CH<sub>2</sub> group

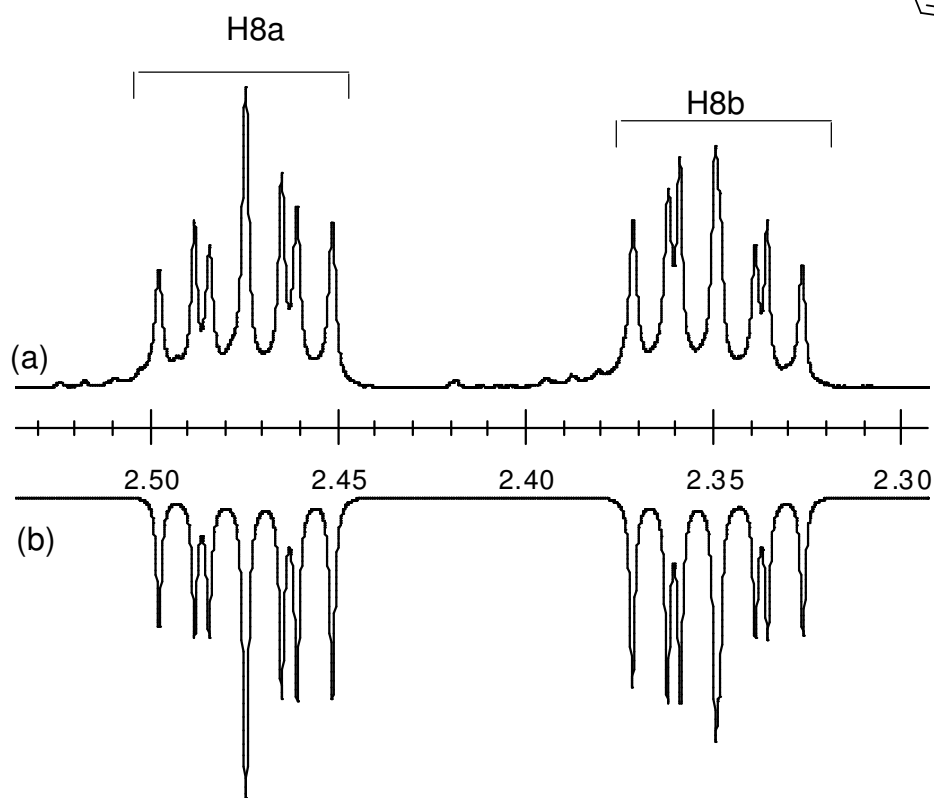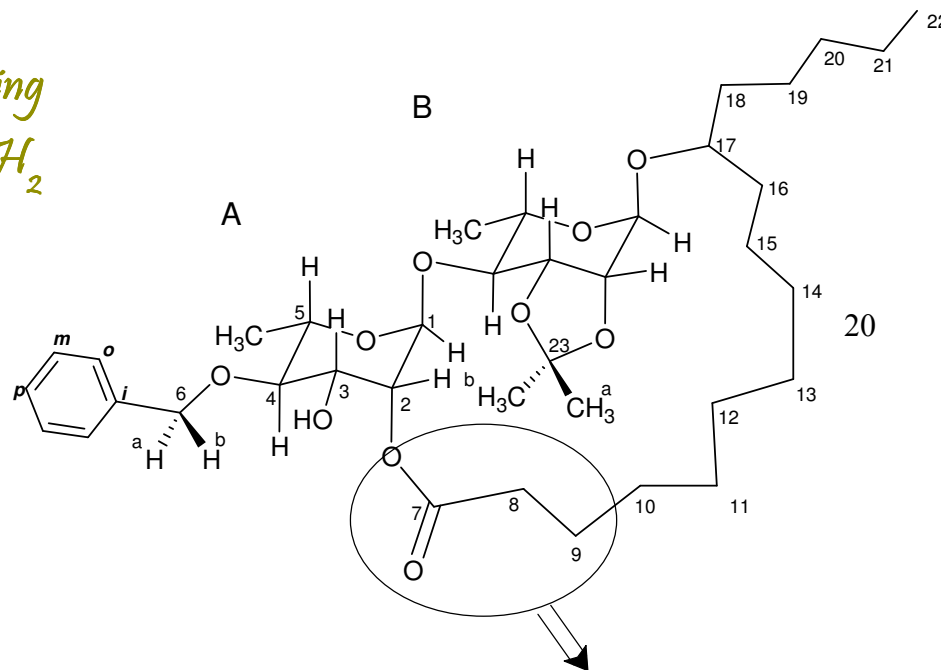

- $^2J(\text{H8a}, \text{H8b}) = -13.98 \text{ Hz}$
- $^3J(\text{H8a}, \text{H9d}) = 8.3 \text{ Hz}$
- $^3J(\text{H8a}, \text{H9c}) = 5.4 \text{ Hz}$
- $^3J(\text{H8b}, \text{H9c}) = 7.95 \text{ Hz}$
- $^3J(\text{H8b}, \text{H9d}) = 5.35 \text{ Hz}$

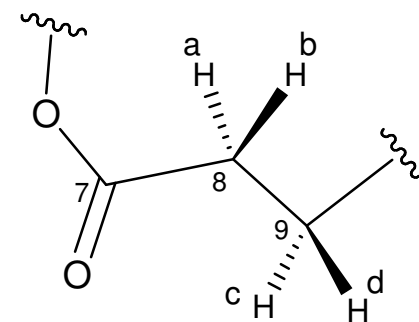

# DPFGSENOE spectrum

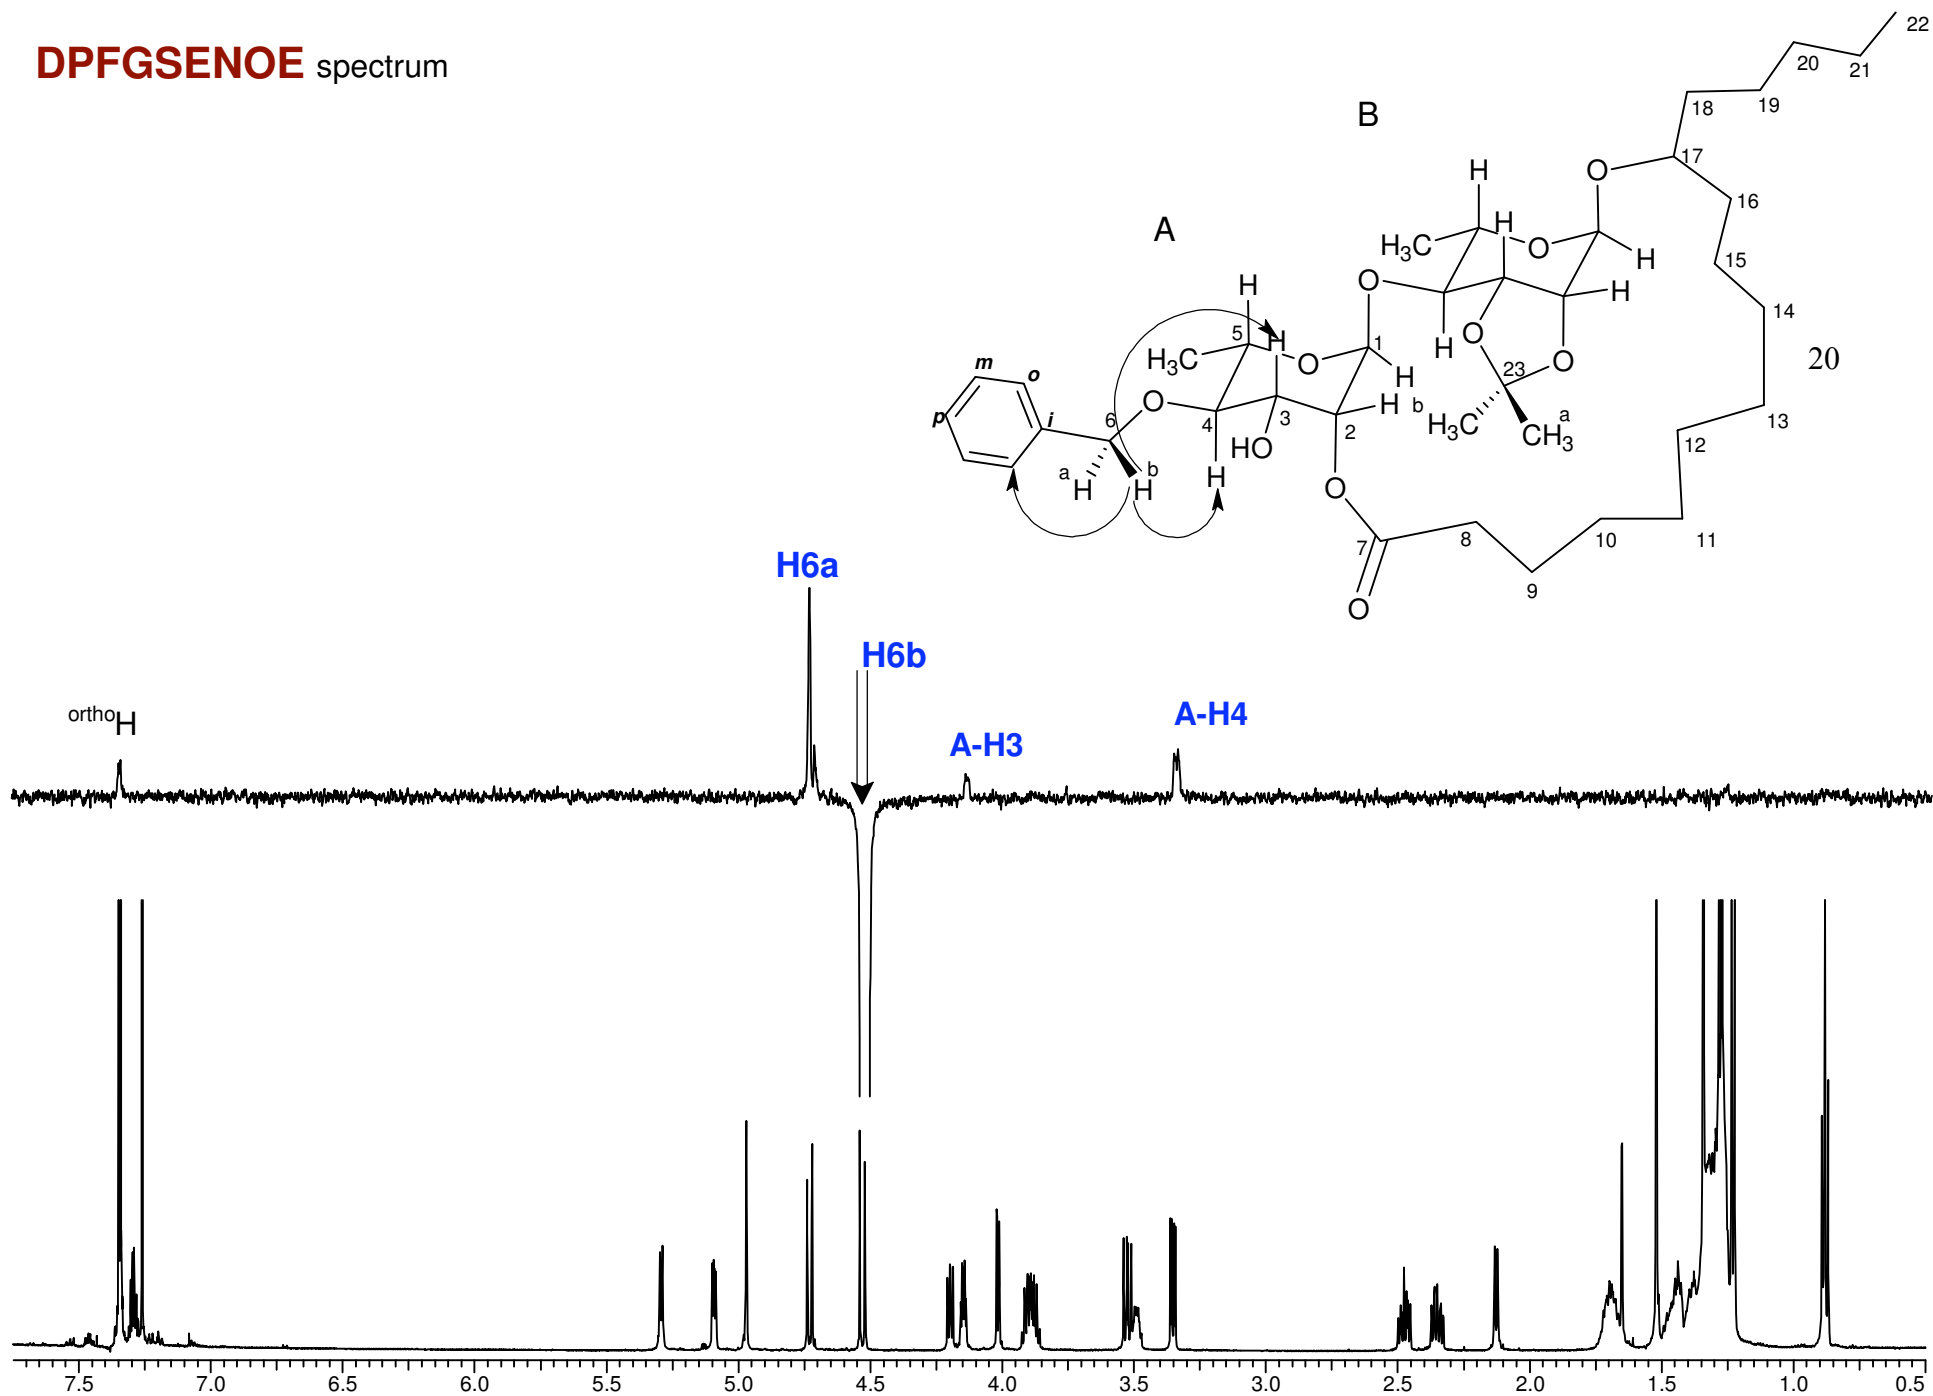



# DPFGSENOE spectrum

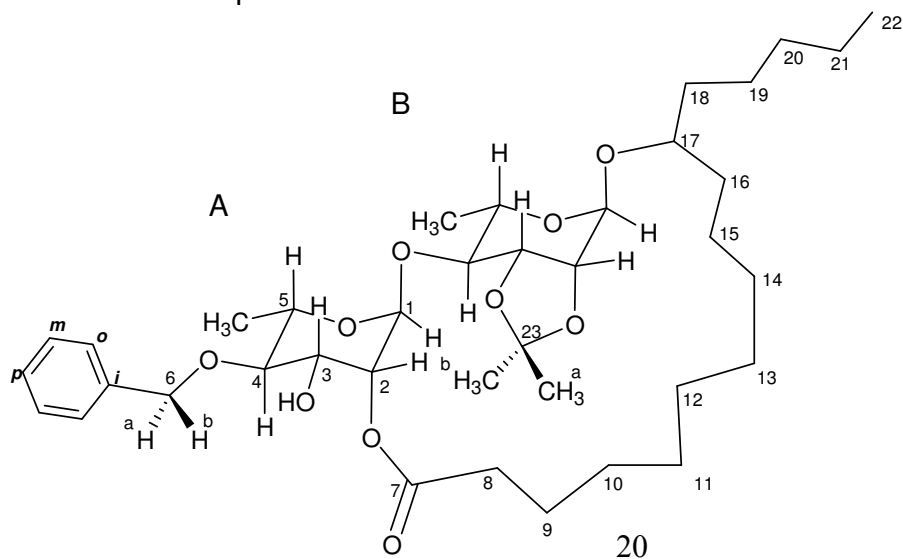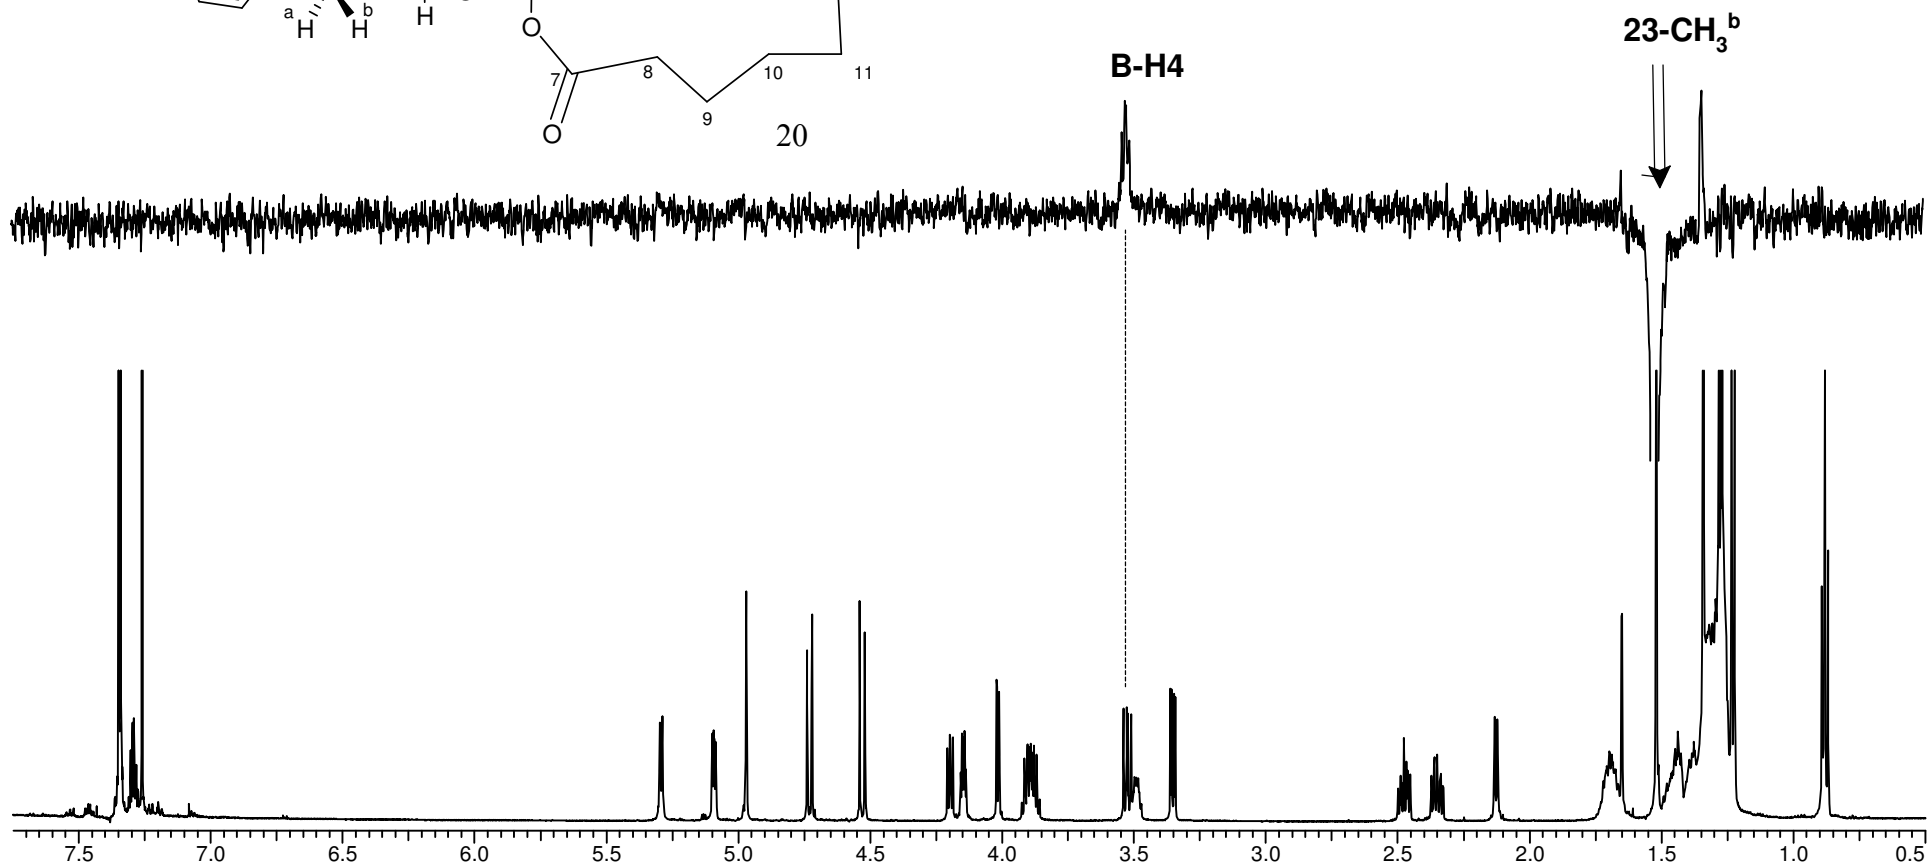

# gCOSY

(for compd 20)

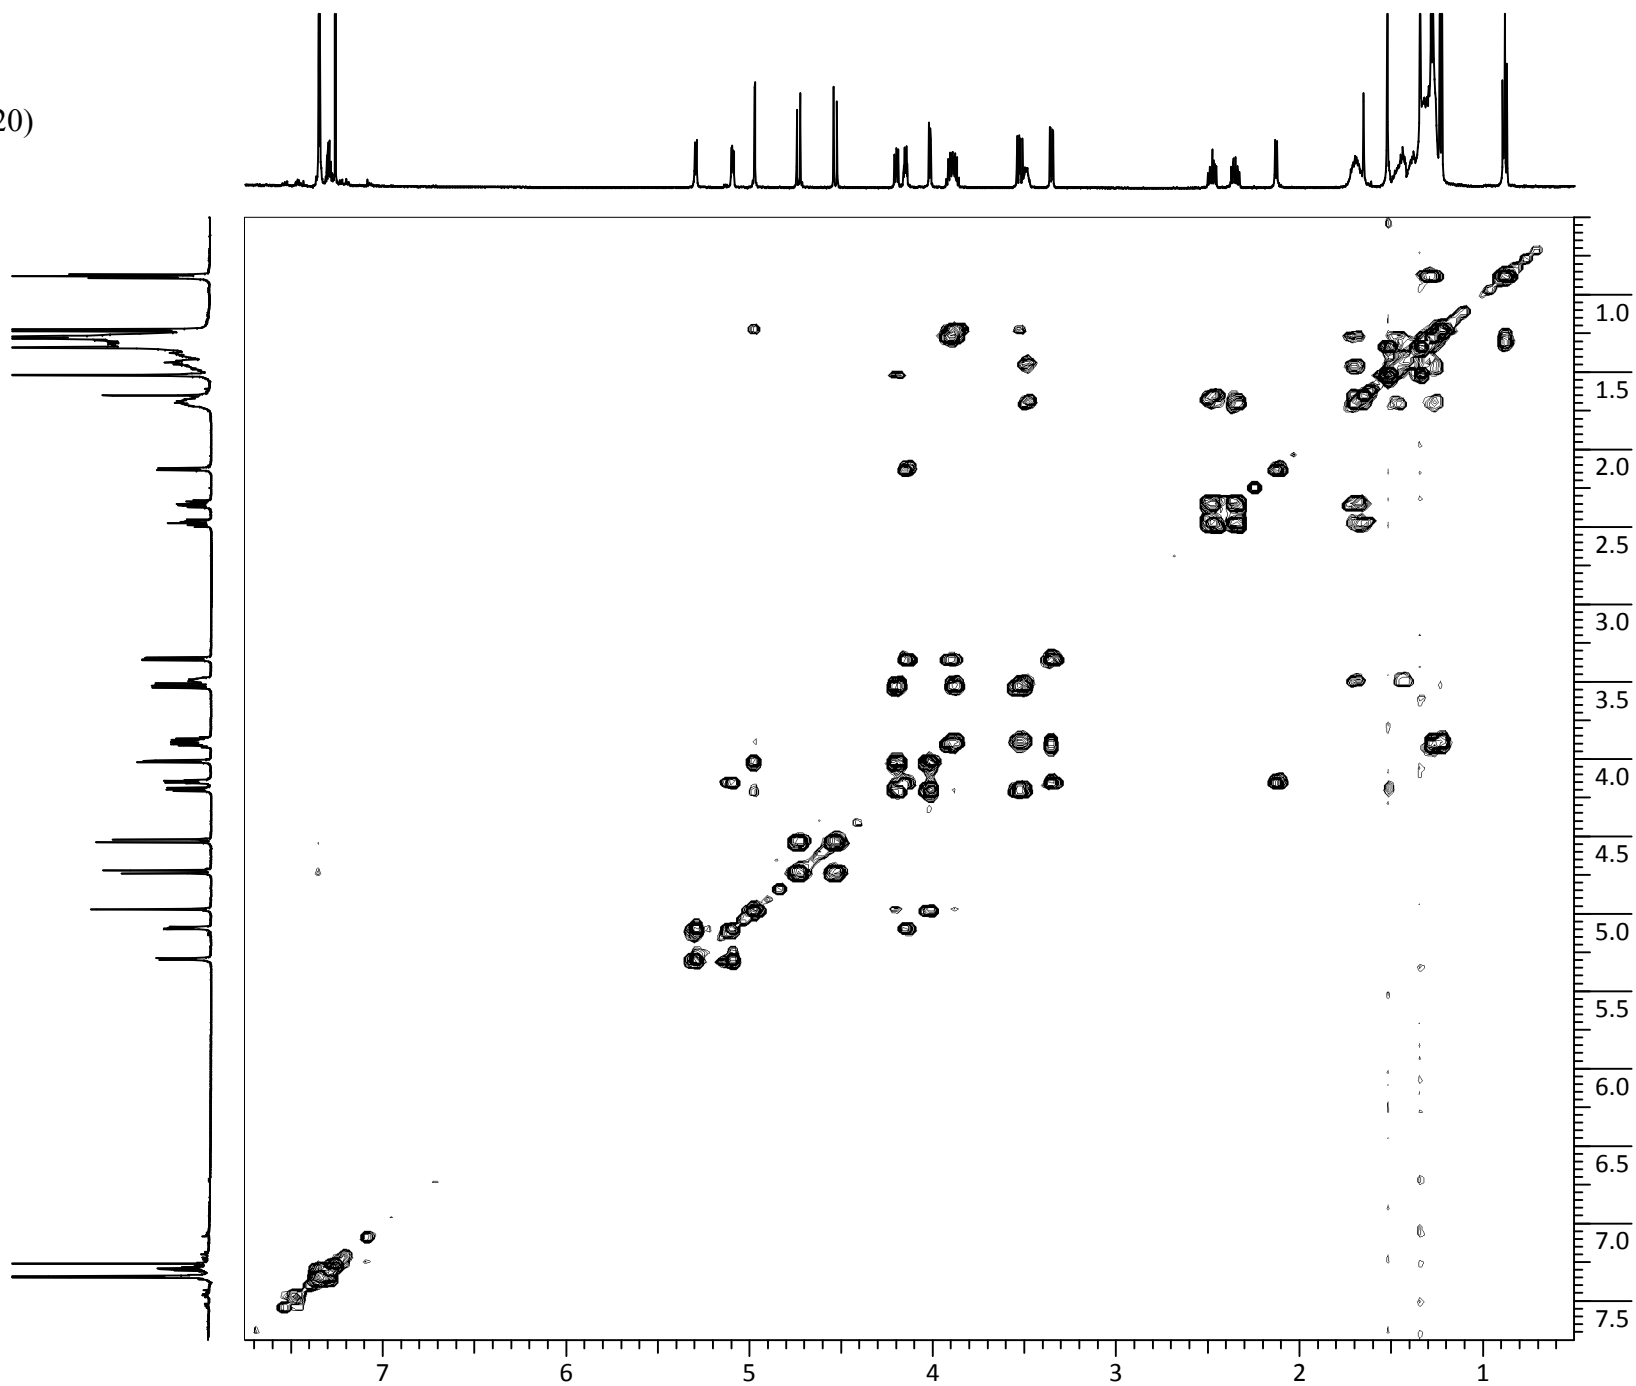

# gCOSY

*aliphatic region*

(for compd 20)

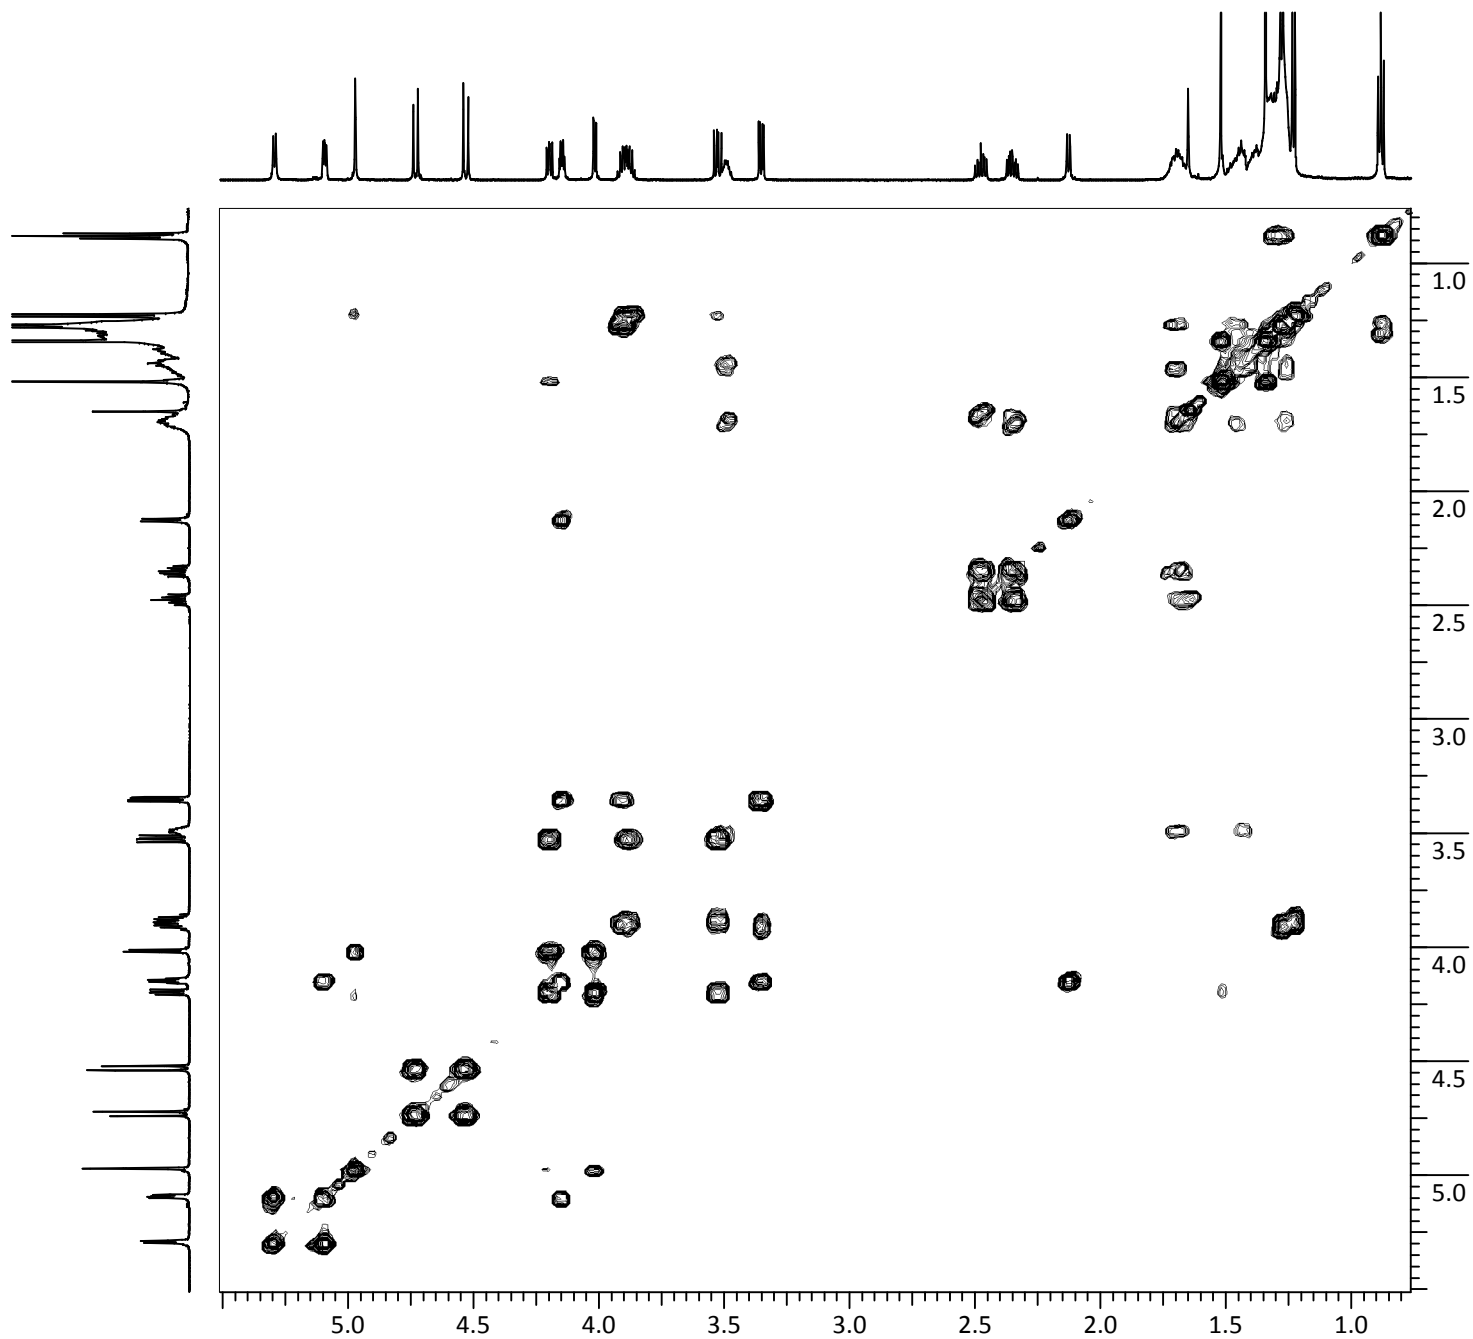

# Determining multiplicity of carbon resonances

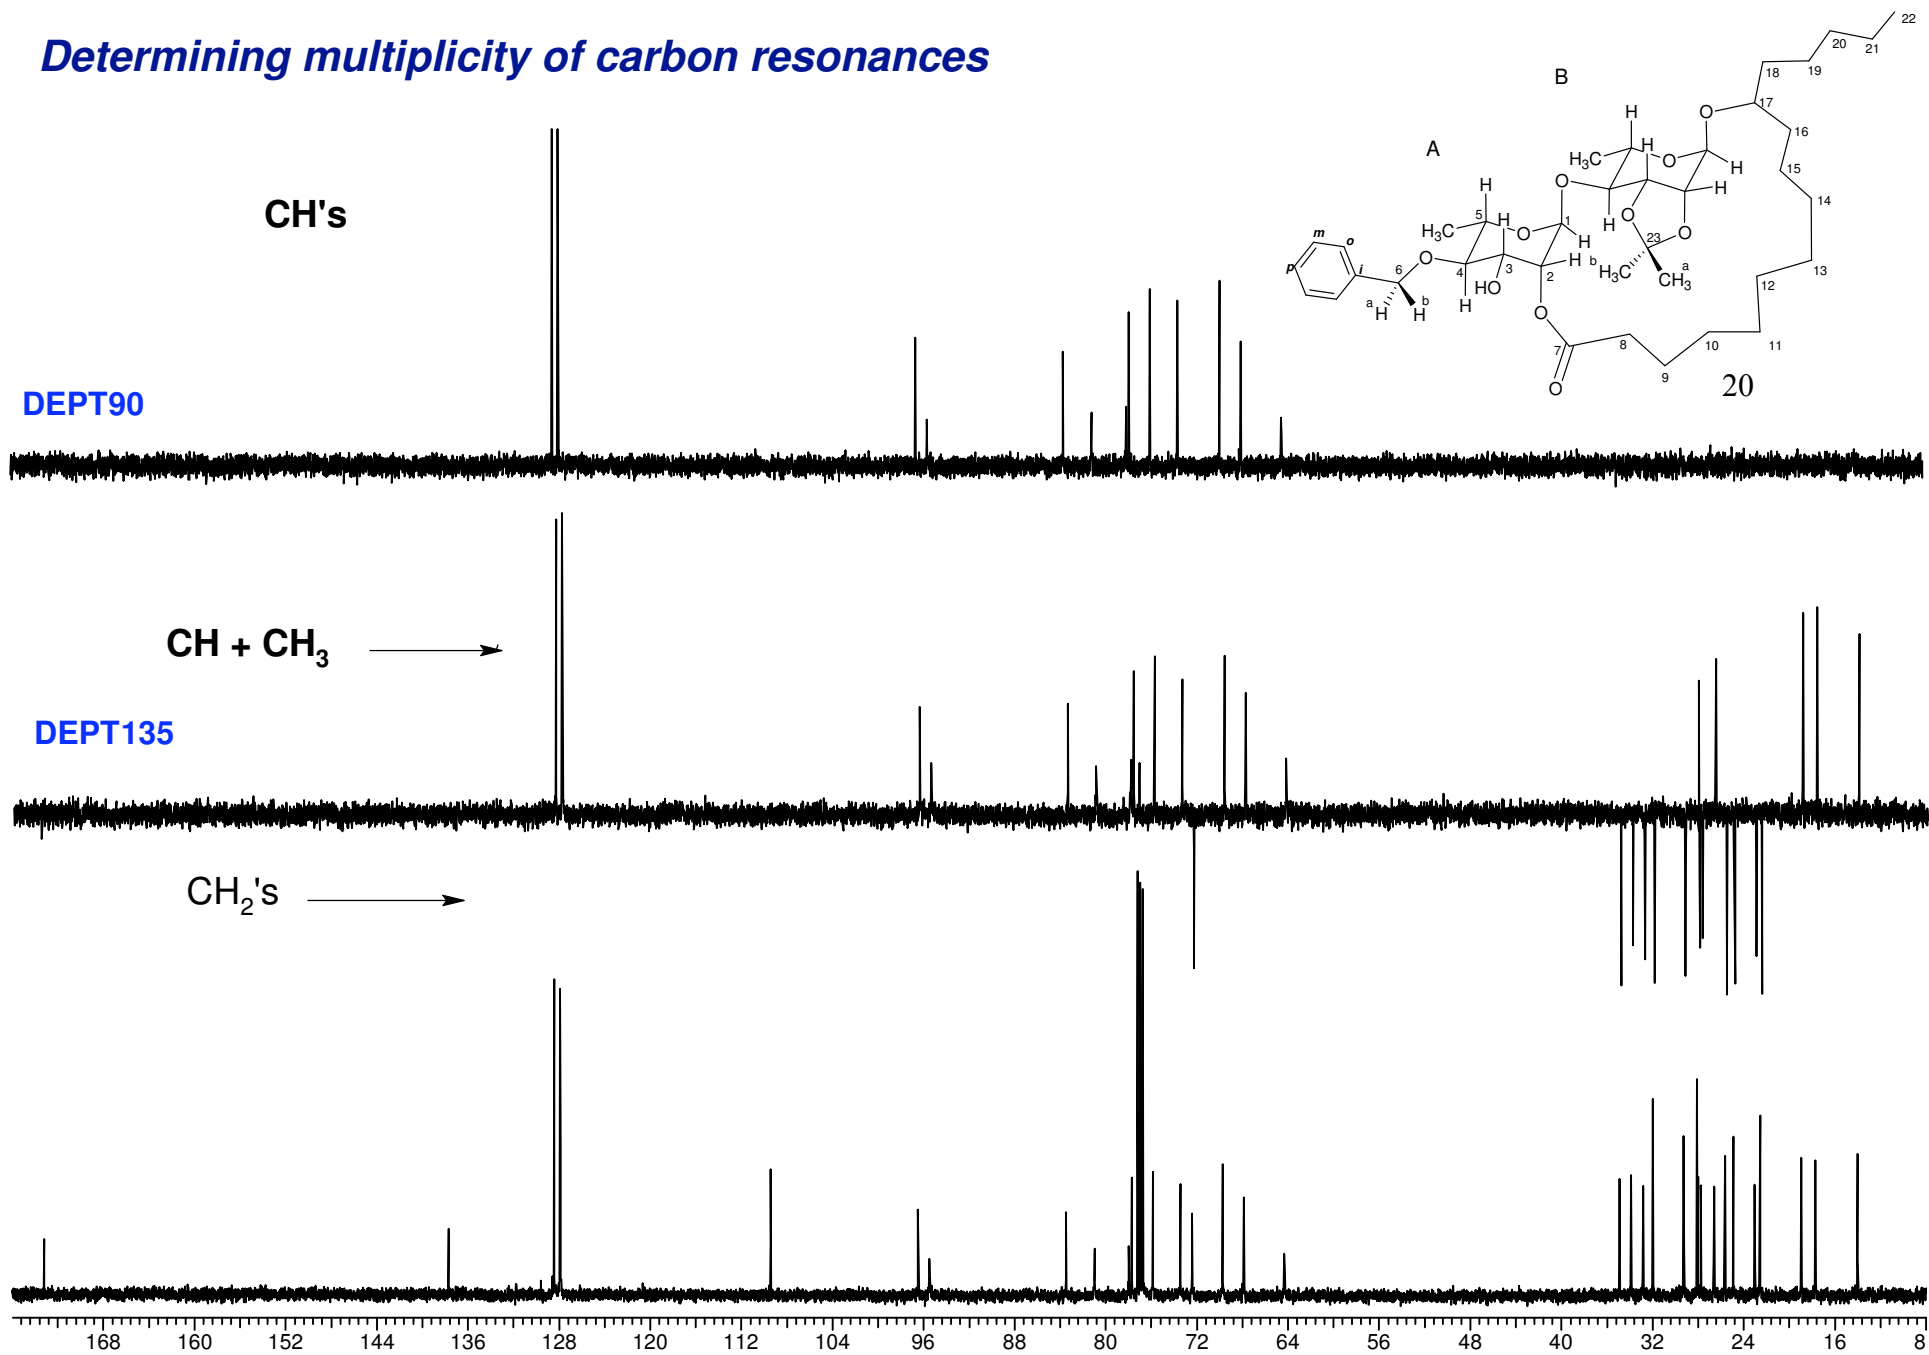

# gHSQCAD

One-bond correlations

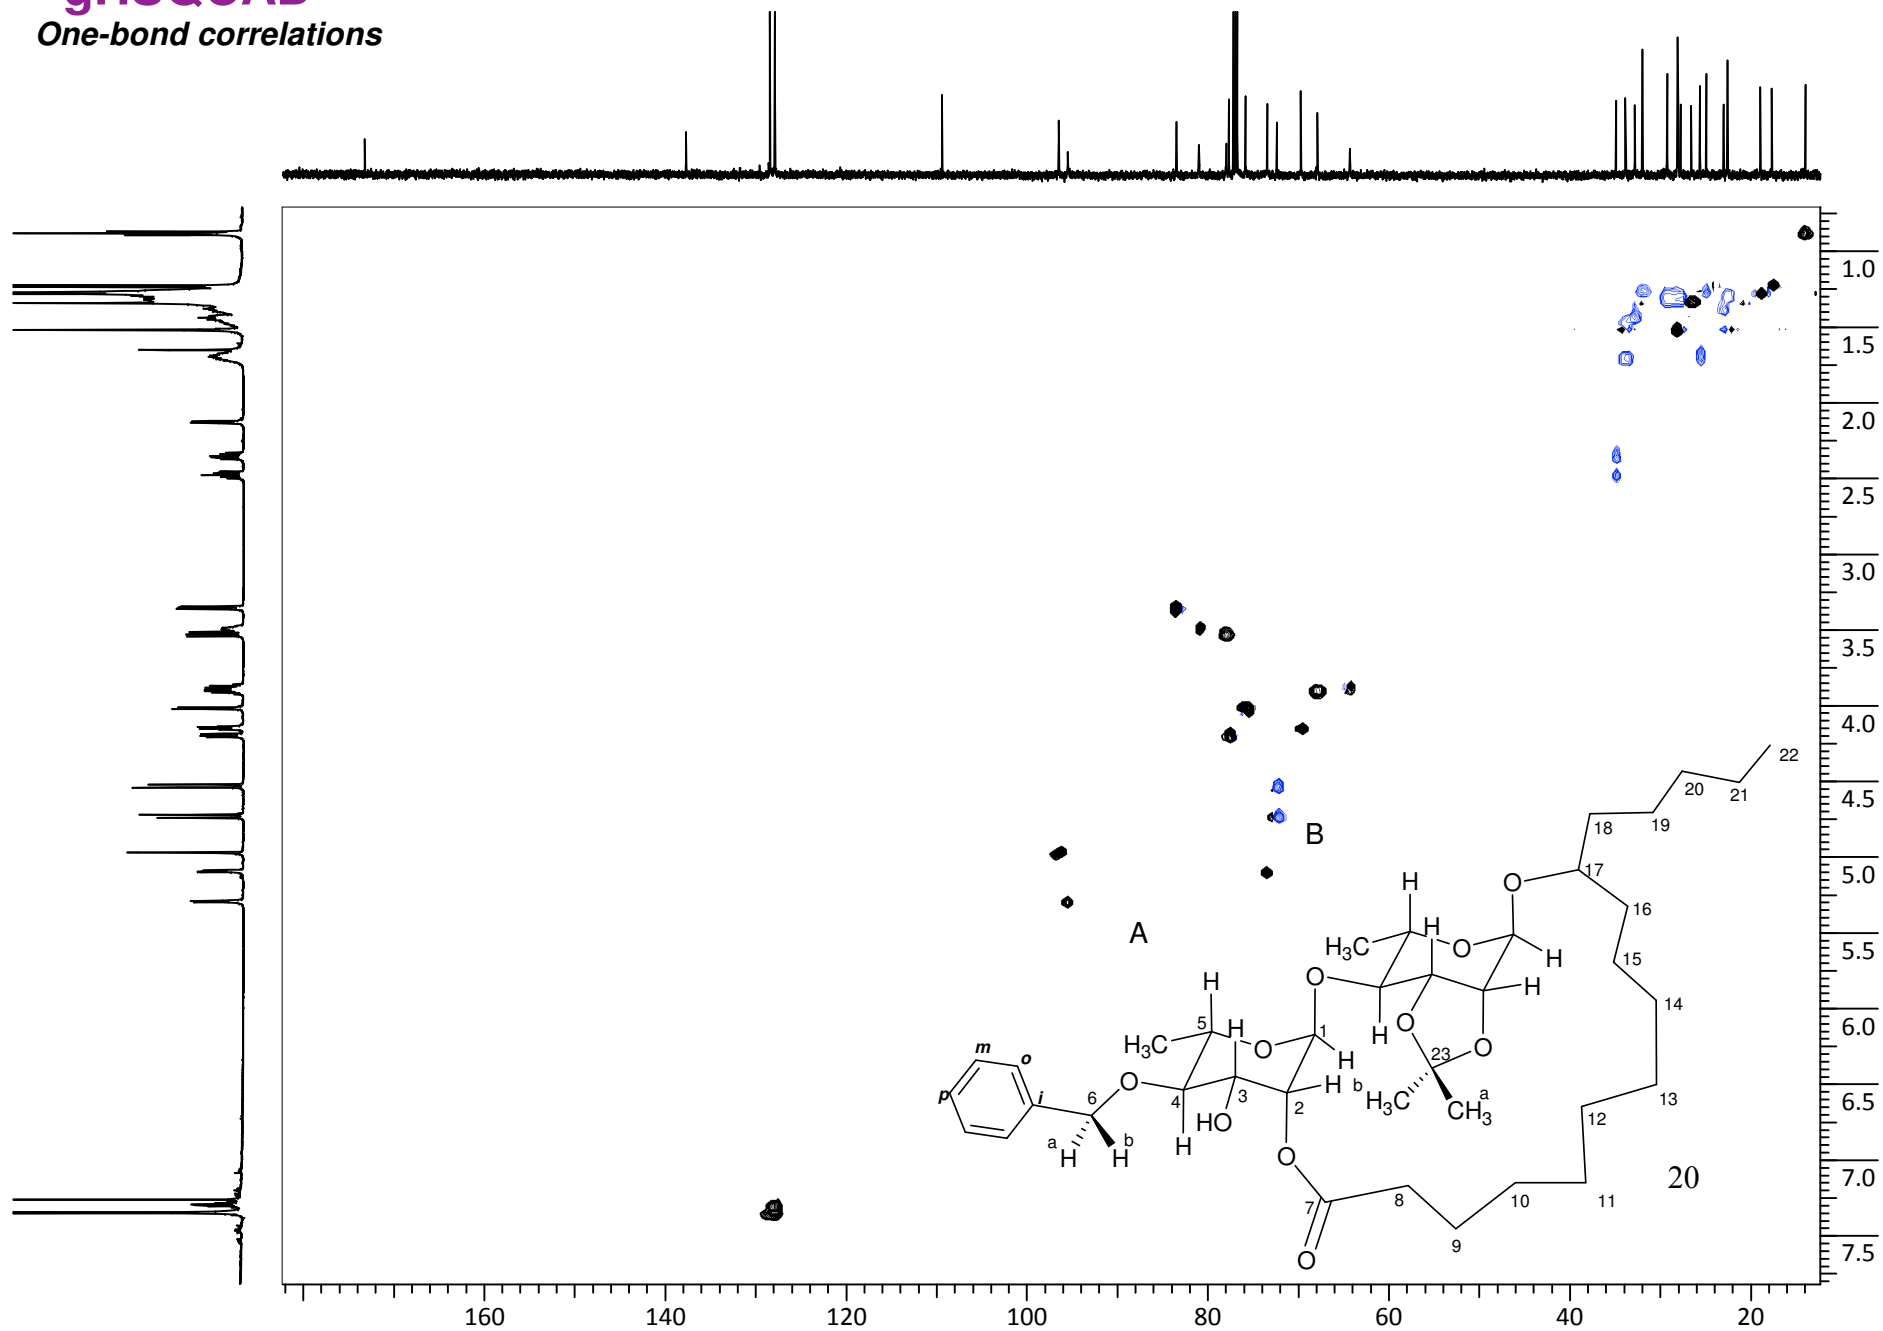

# gHSQCAD

One-bond correlations

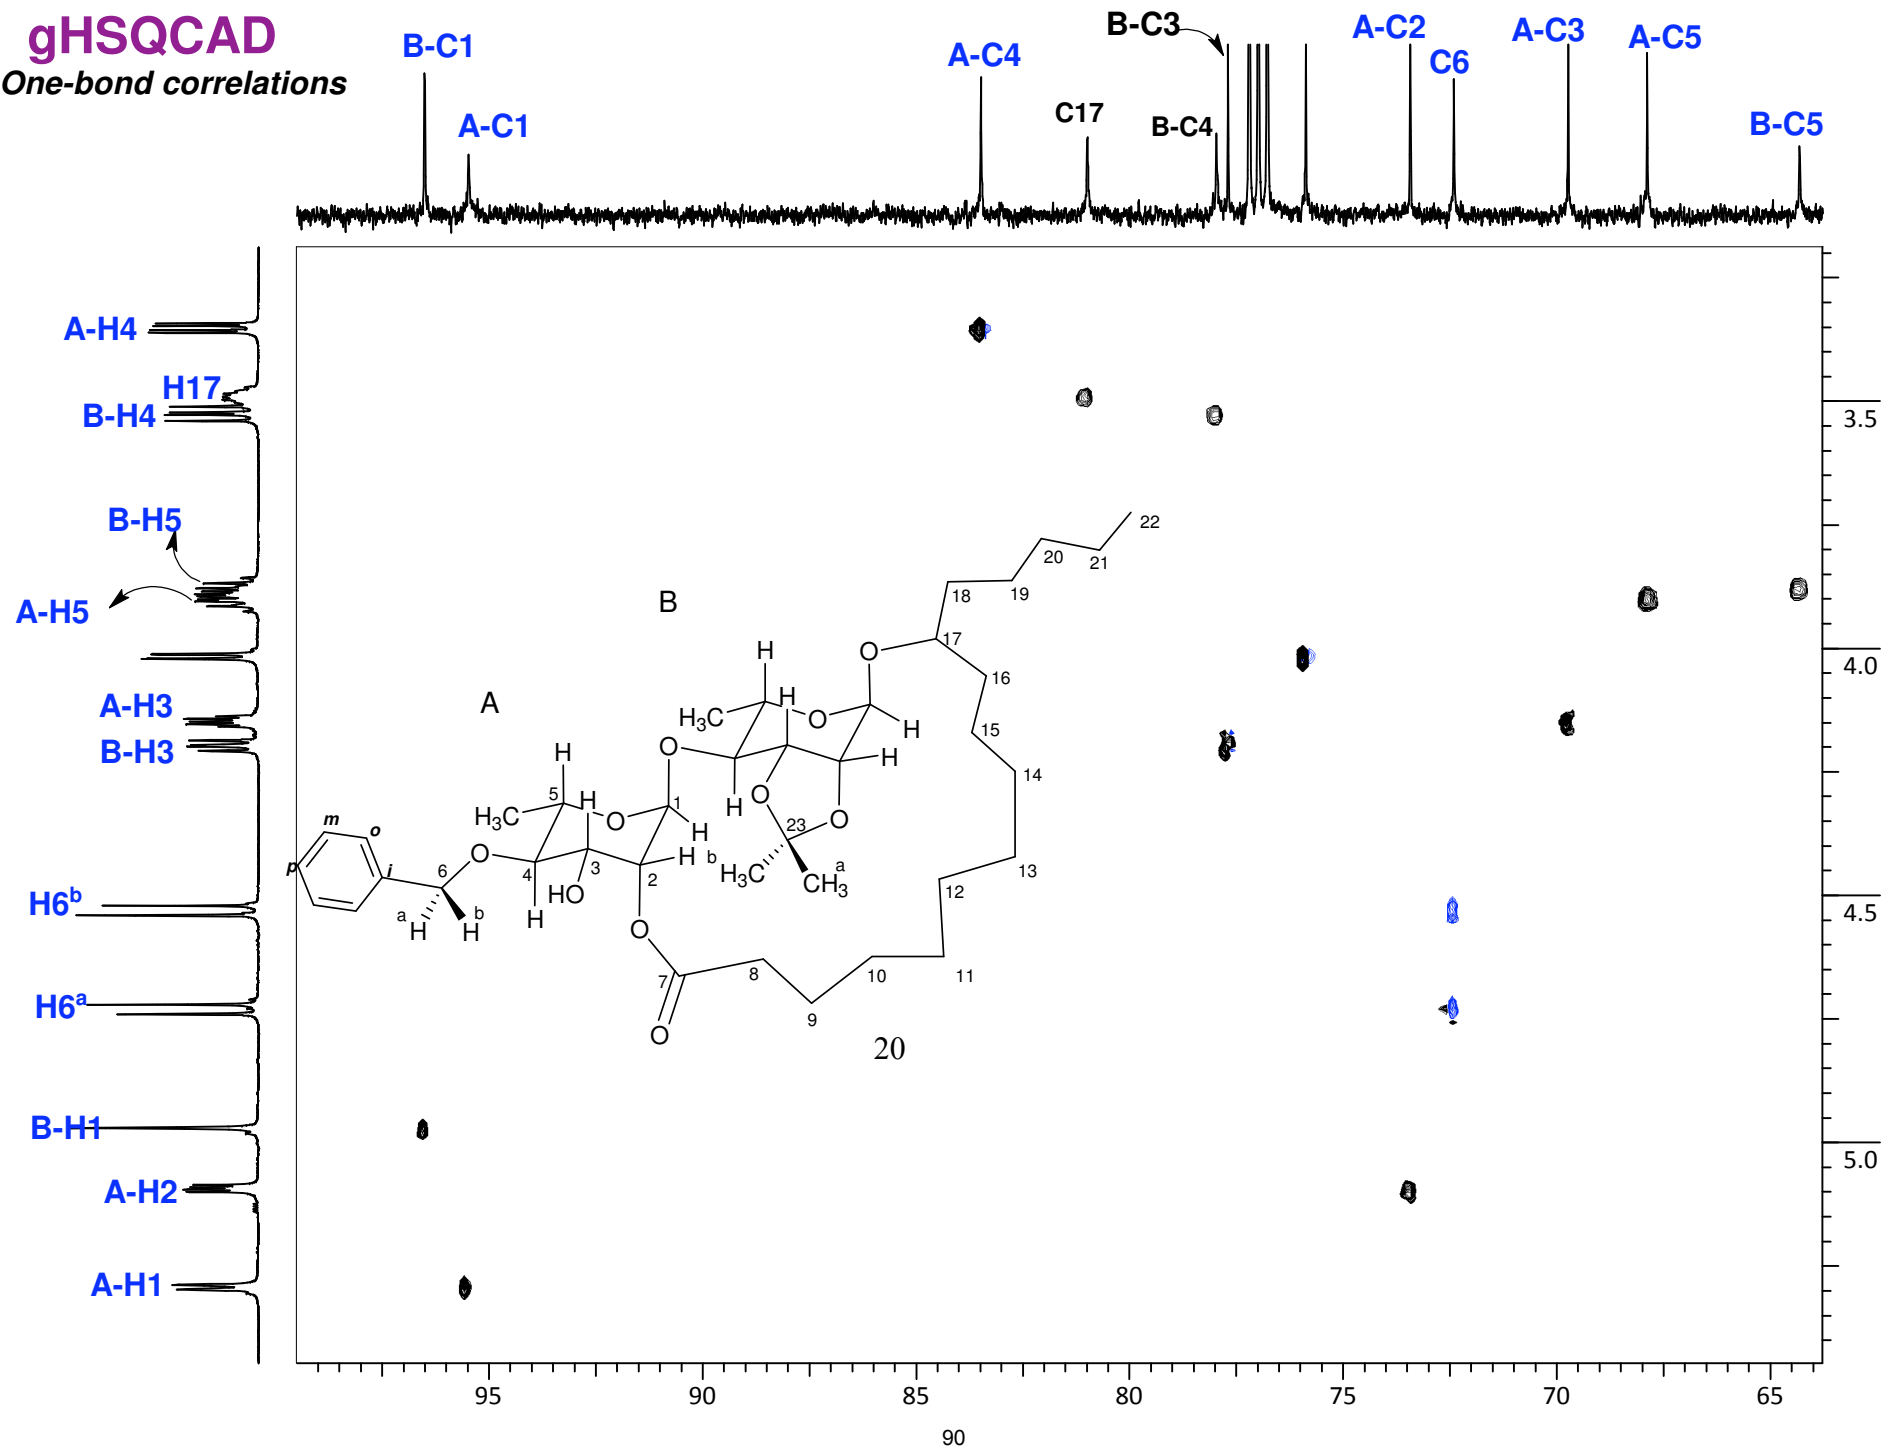

# gHSQCAD

One-bond correlations

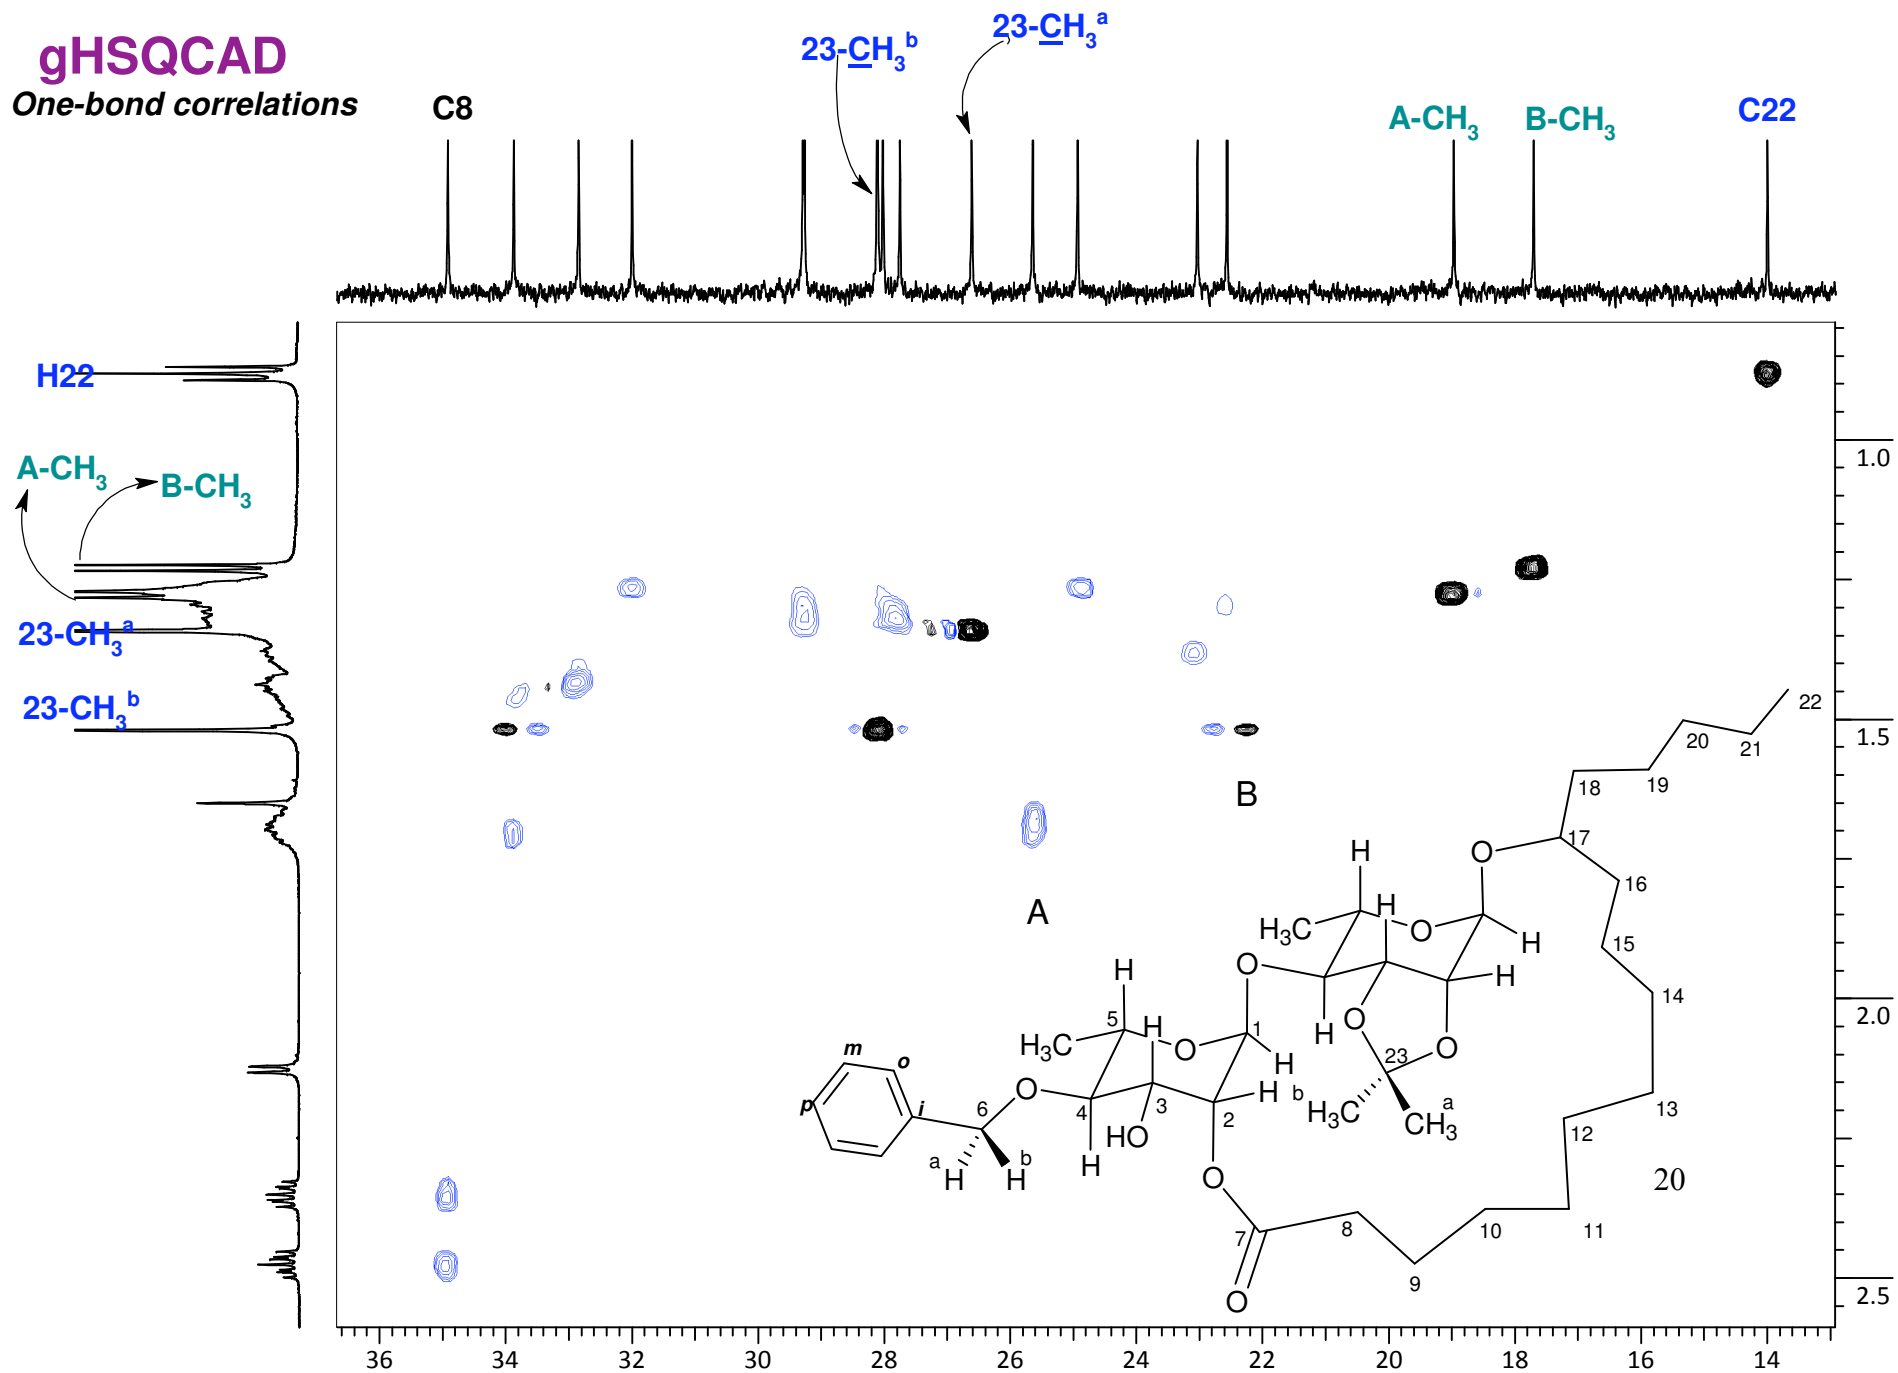

# gHSQCTOCSY

(for compd 20)

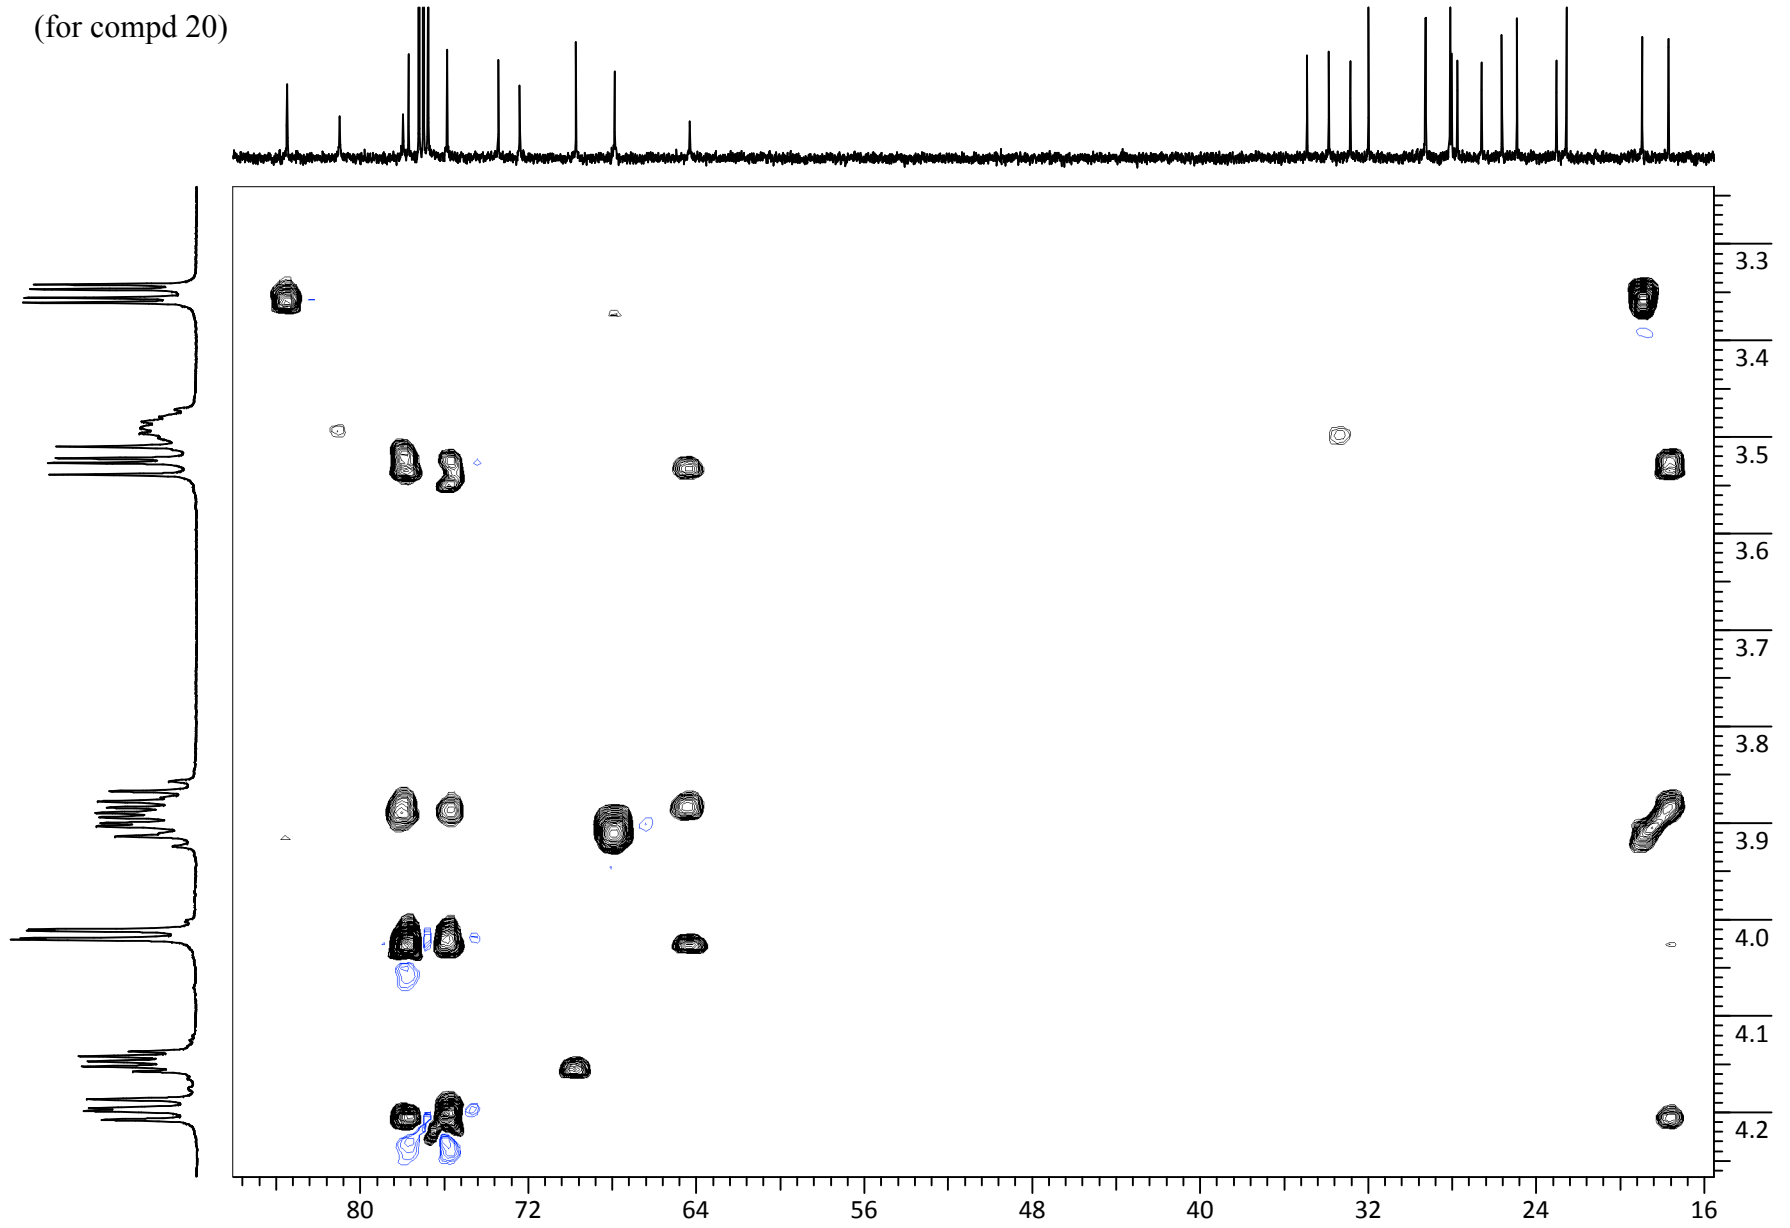



# gHSQC TOCSY

spin system identification

(mix = 80 ms)

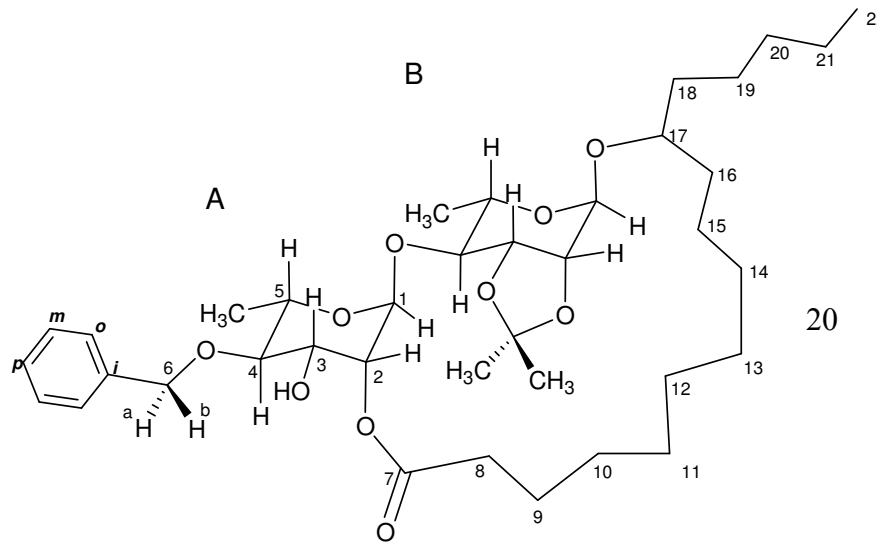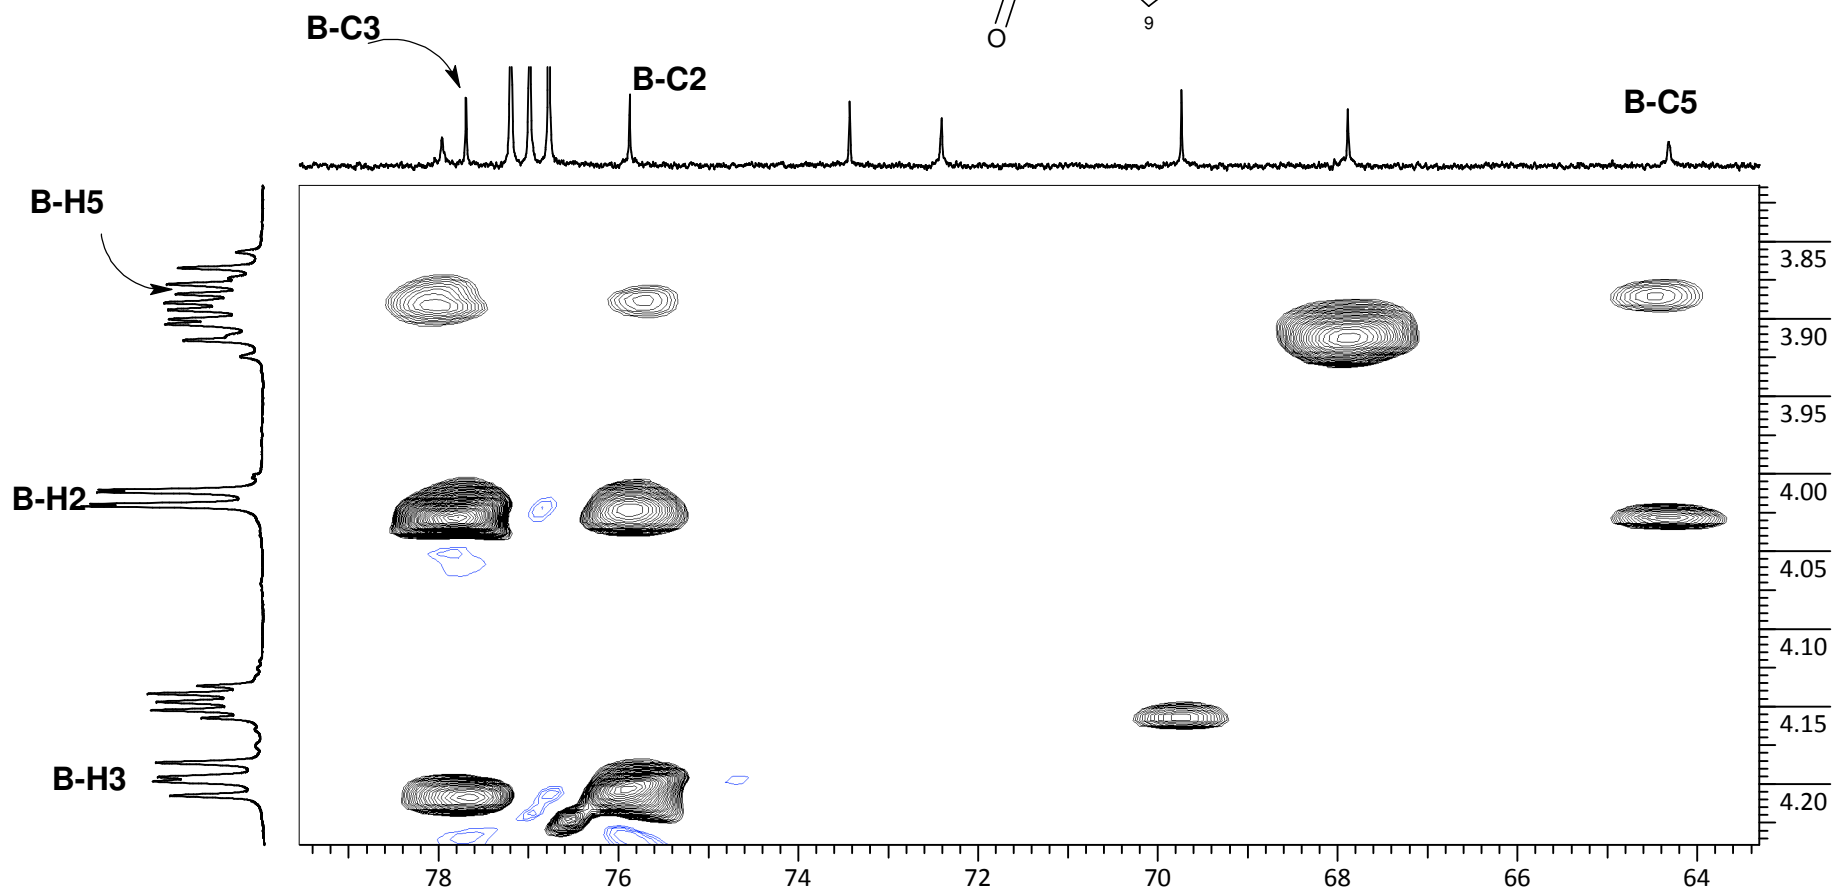

# gHMBCAD

## Long-range correlations

(for compd 20)

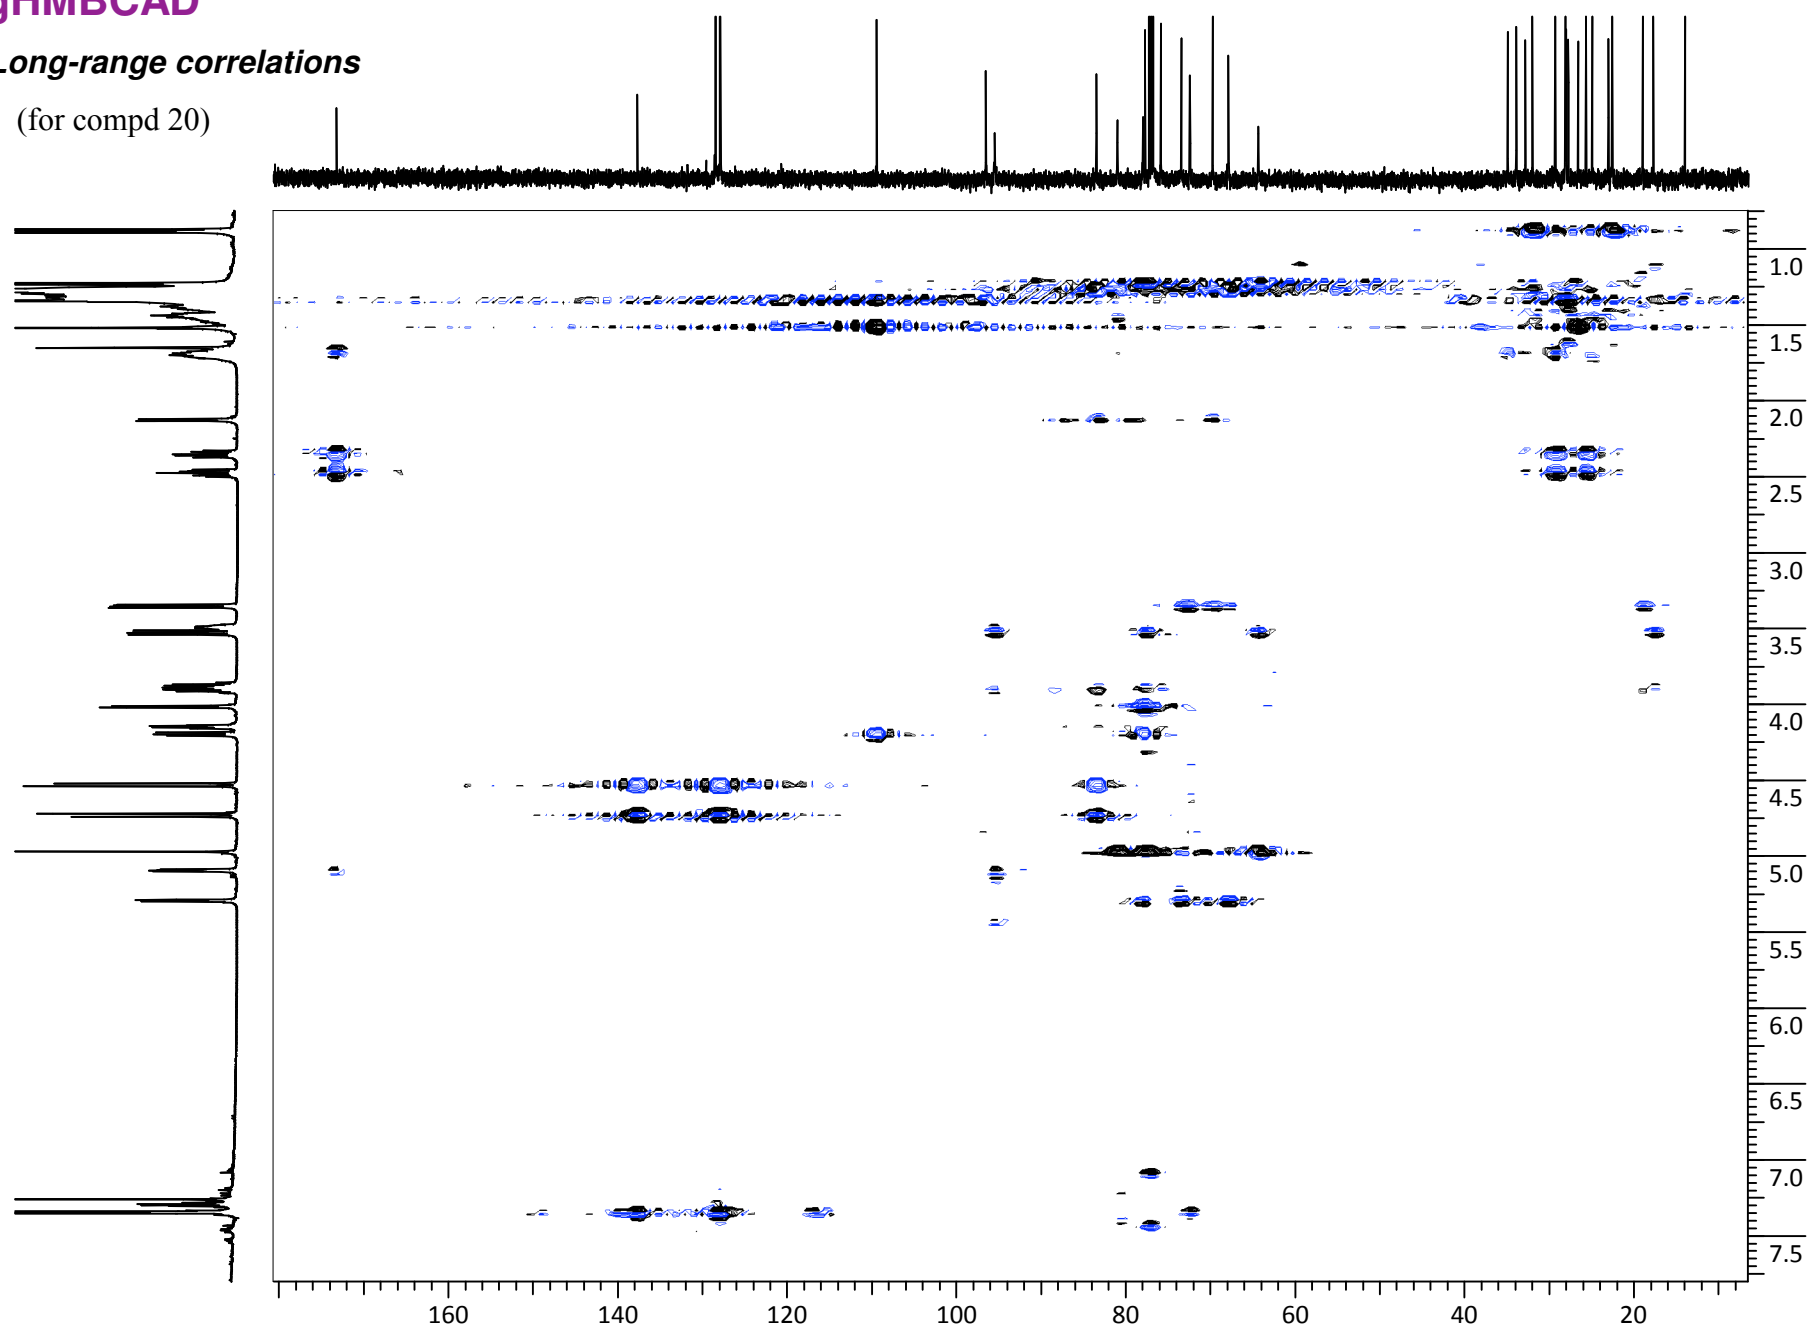

# Linkage confirmation between side chain and A ring

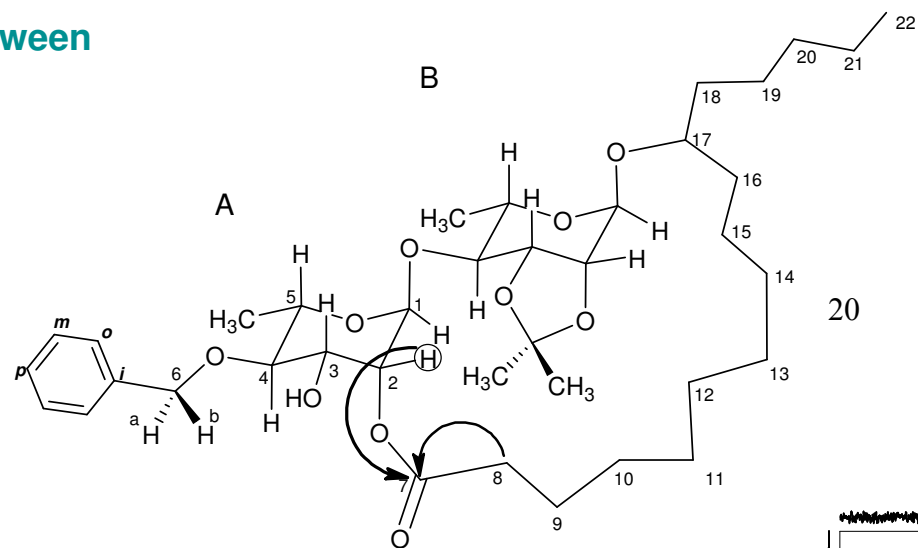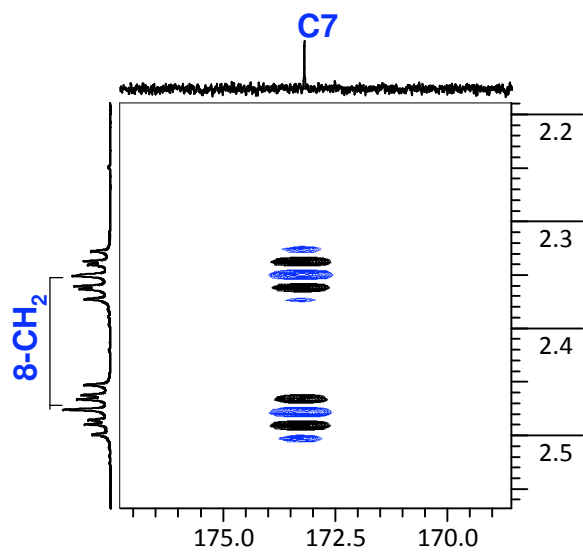

Expansions

gHMBCAD

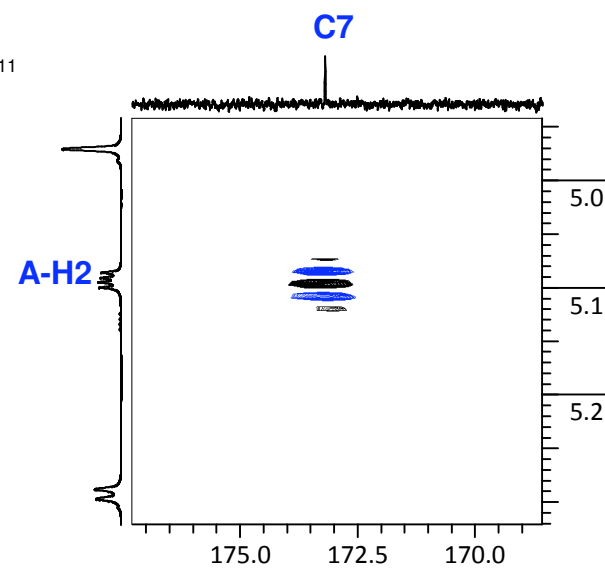

Linkage confirmation between A and B rings

between

B

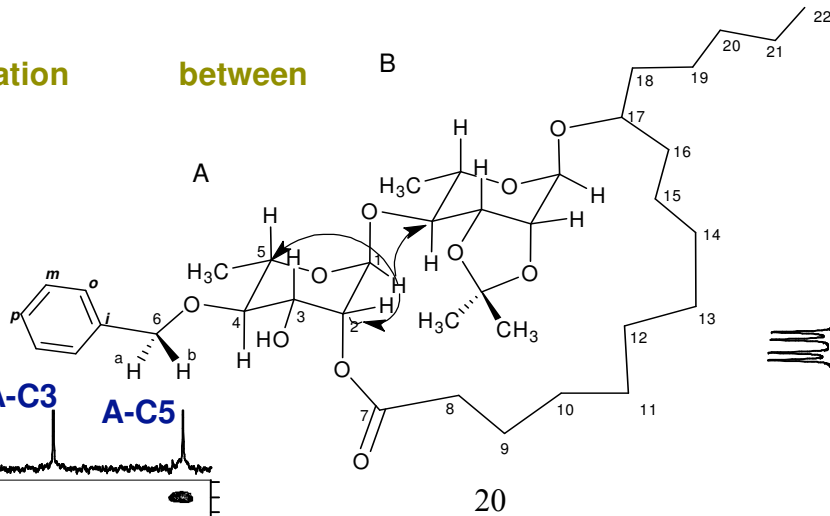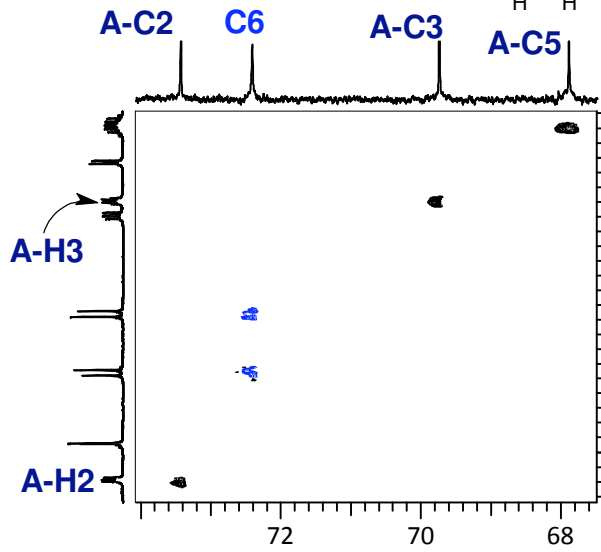

gHSQCAD

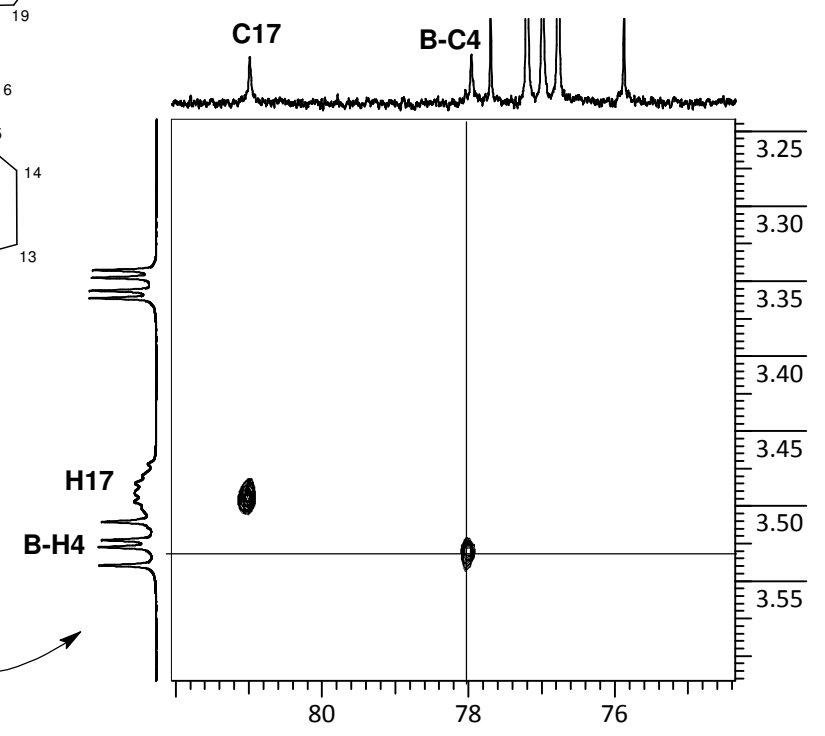

gHMBCAD

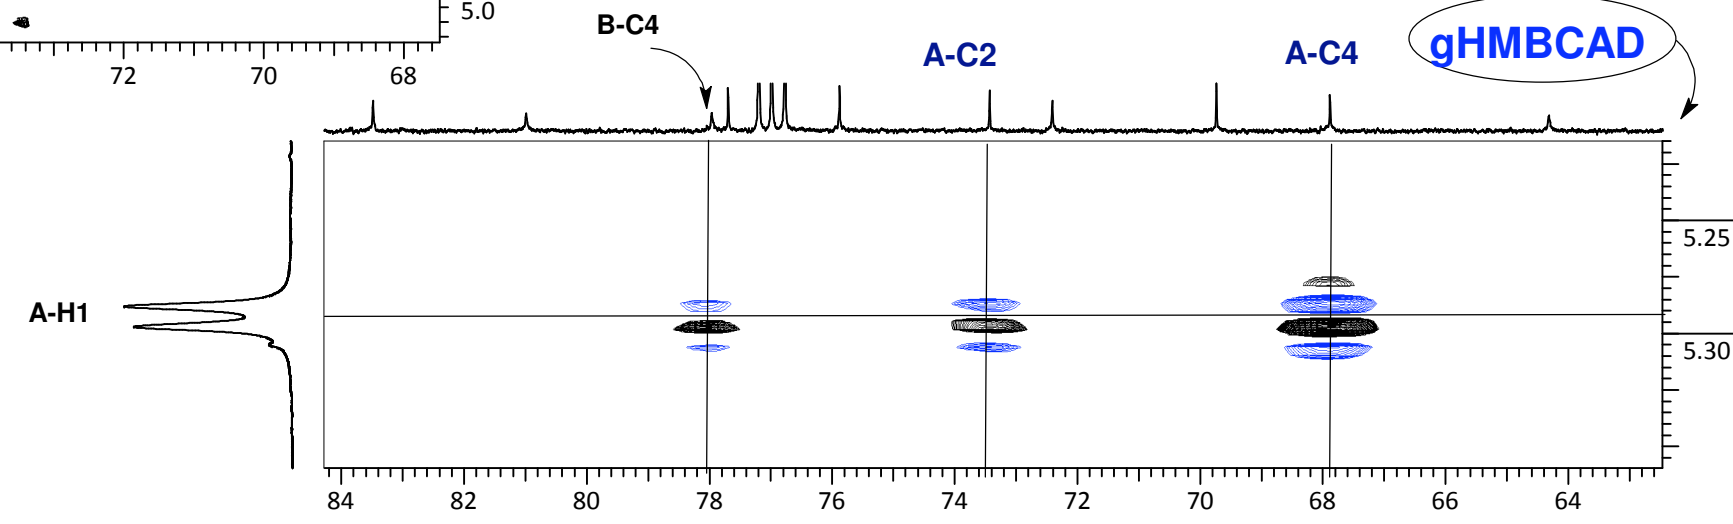

Complete assignments were performed in CDCl<sub>3</sub>, 600 MHz

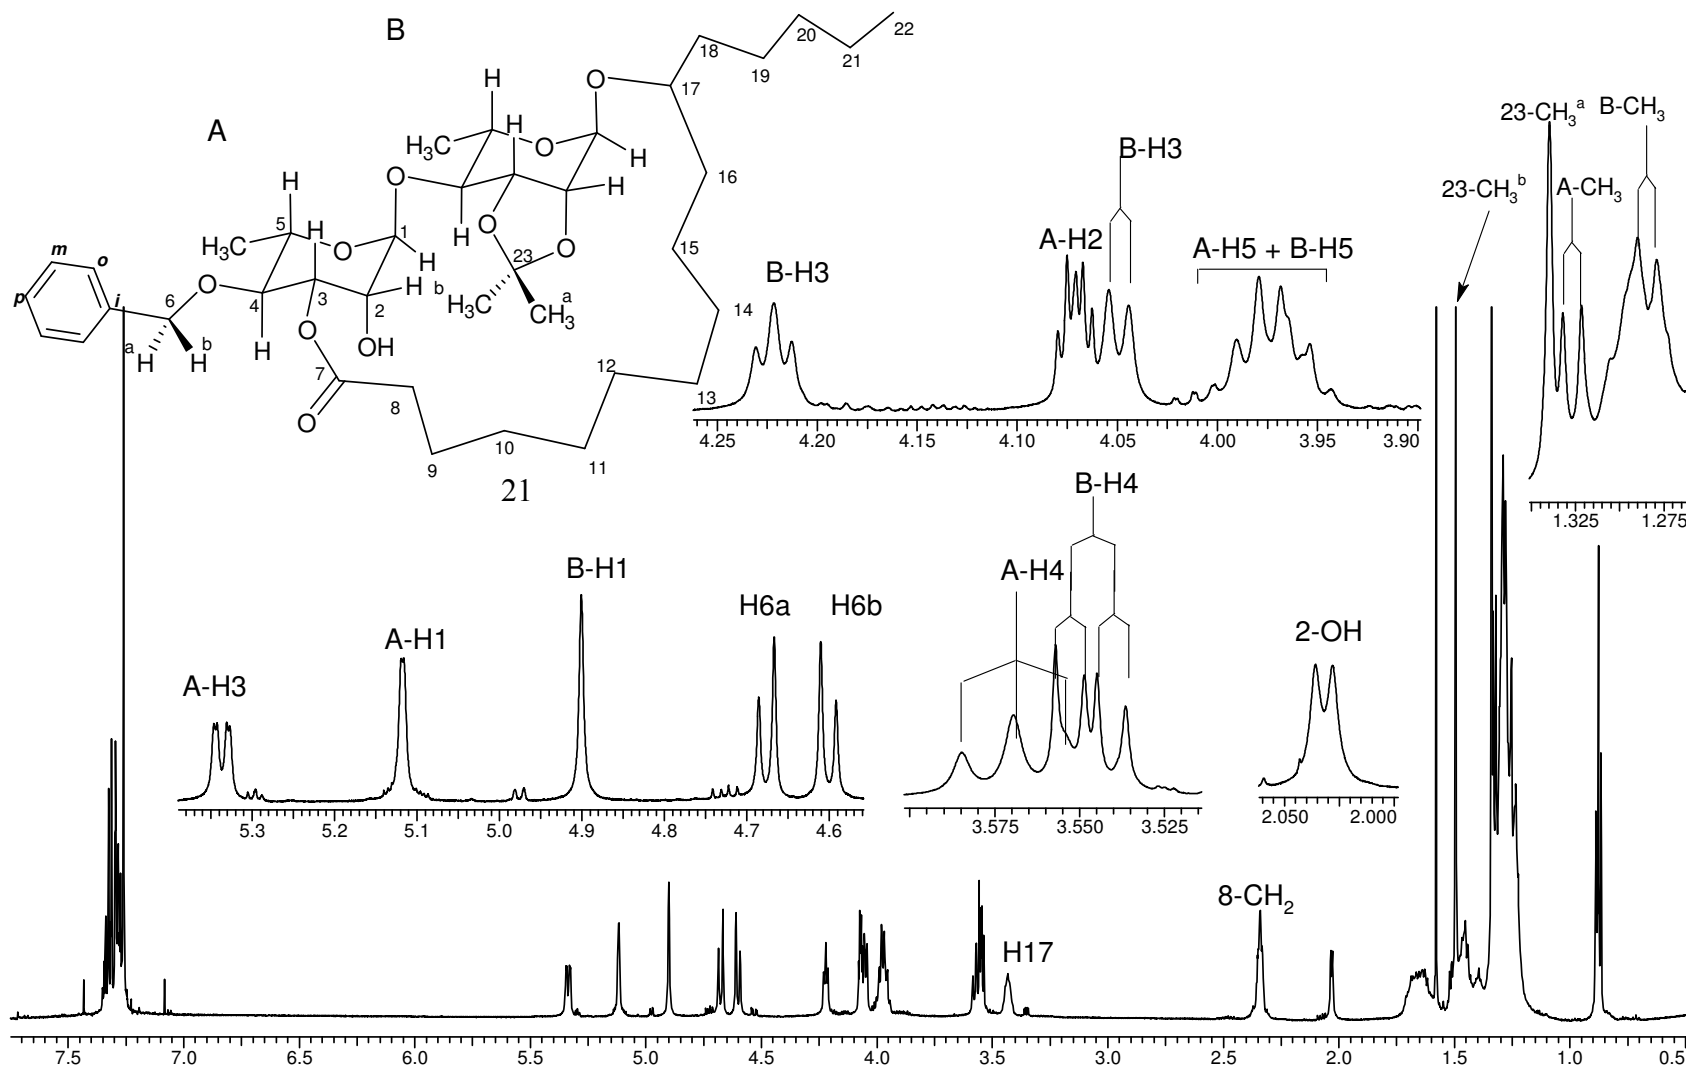

**gCOSY**  
through  $^1\text{H}$ - $^1\text{H}$  couplings  
(for compd 21)

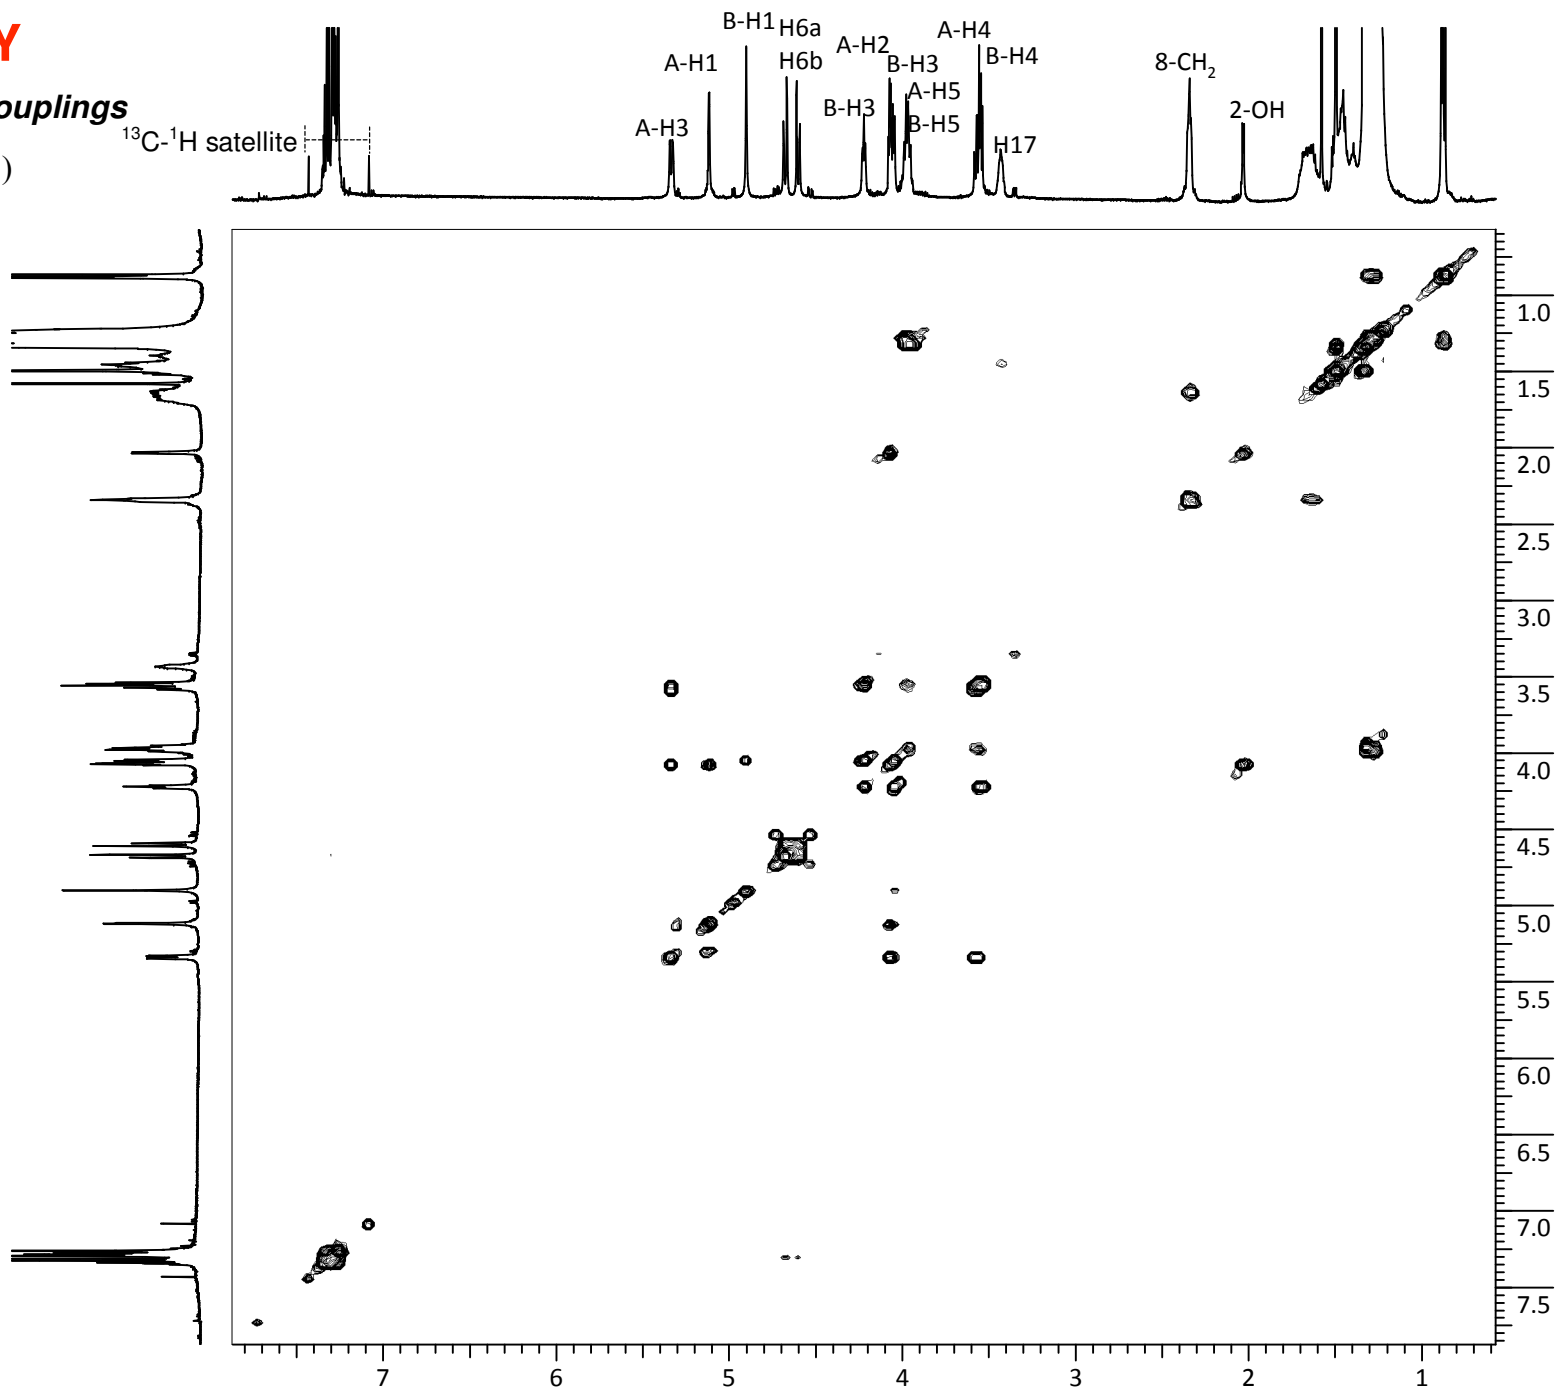

# ROESYAD

*through space correlations*

(for compd 21)

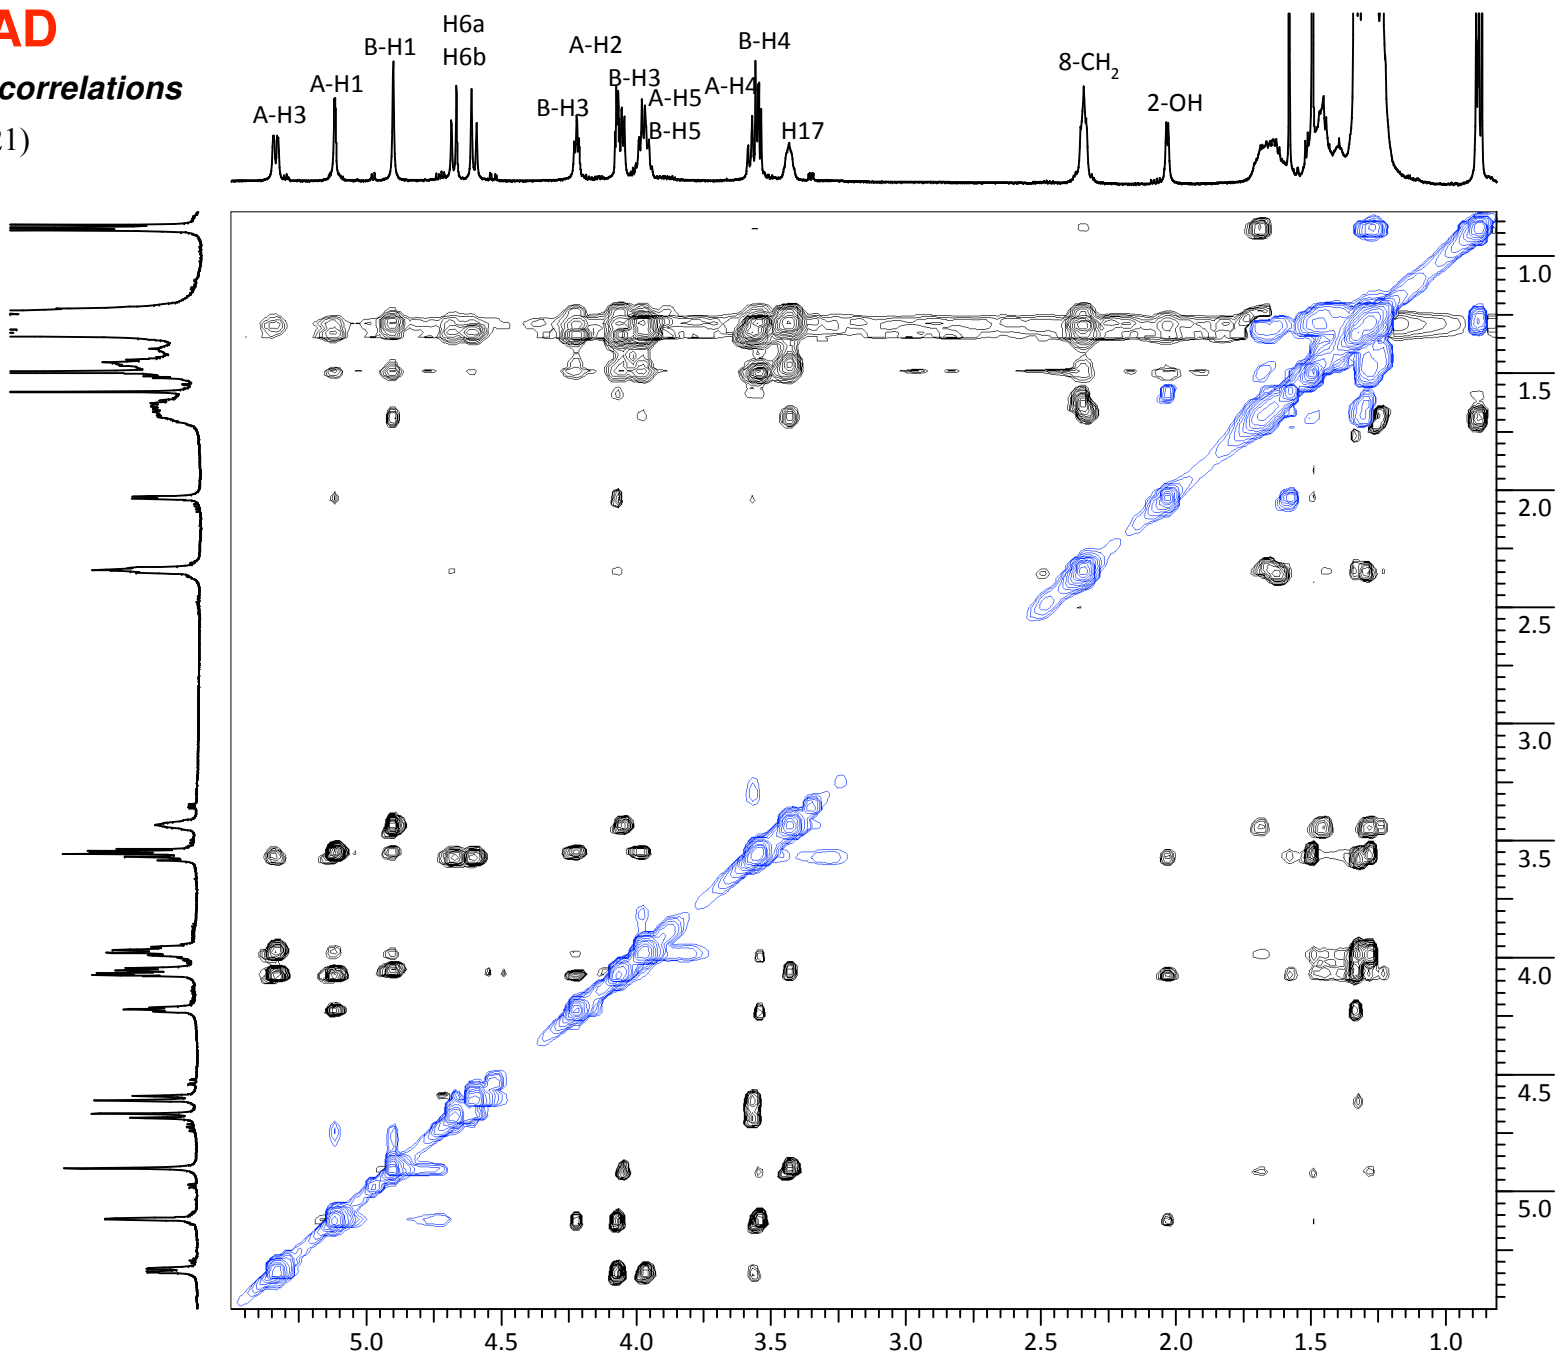

# ROESY

through space correlations

observed nOe's are shown by arrows between 8-CH<sub>2</sub> (side chain) and A-ring protons

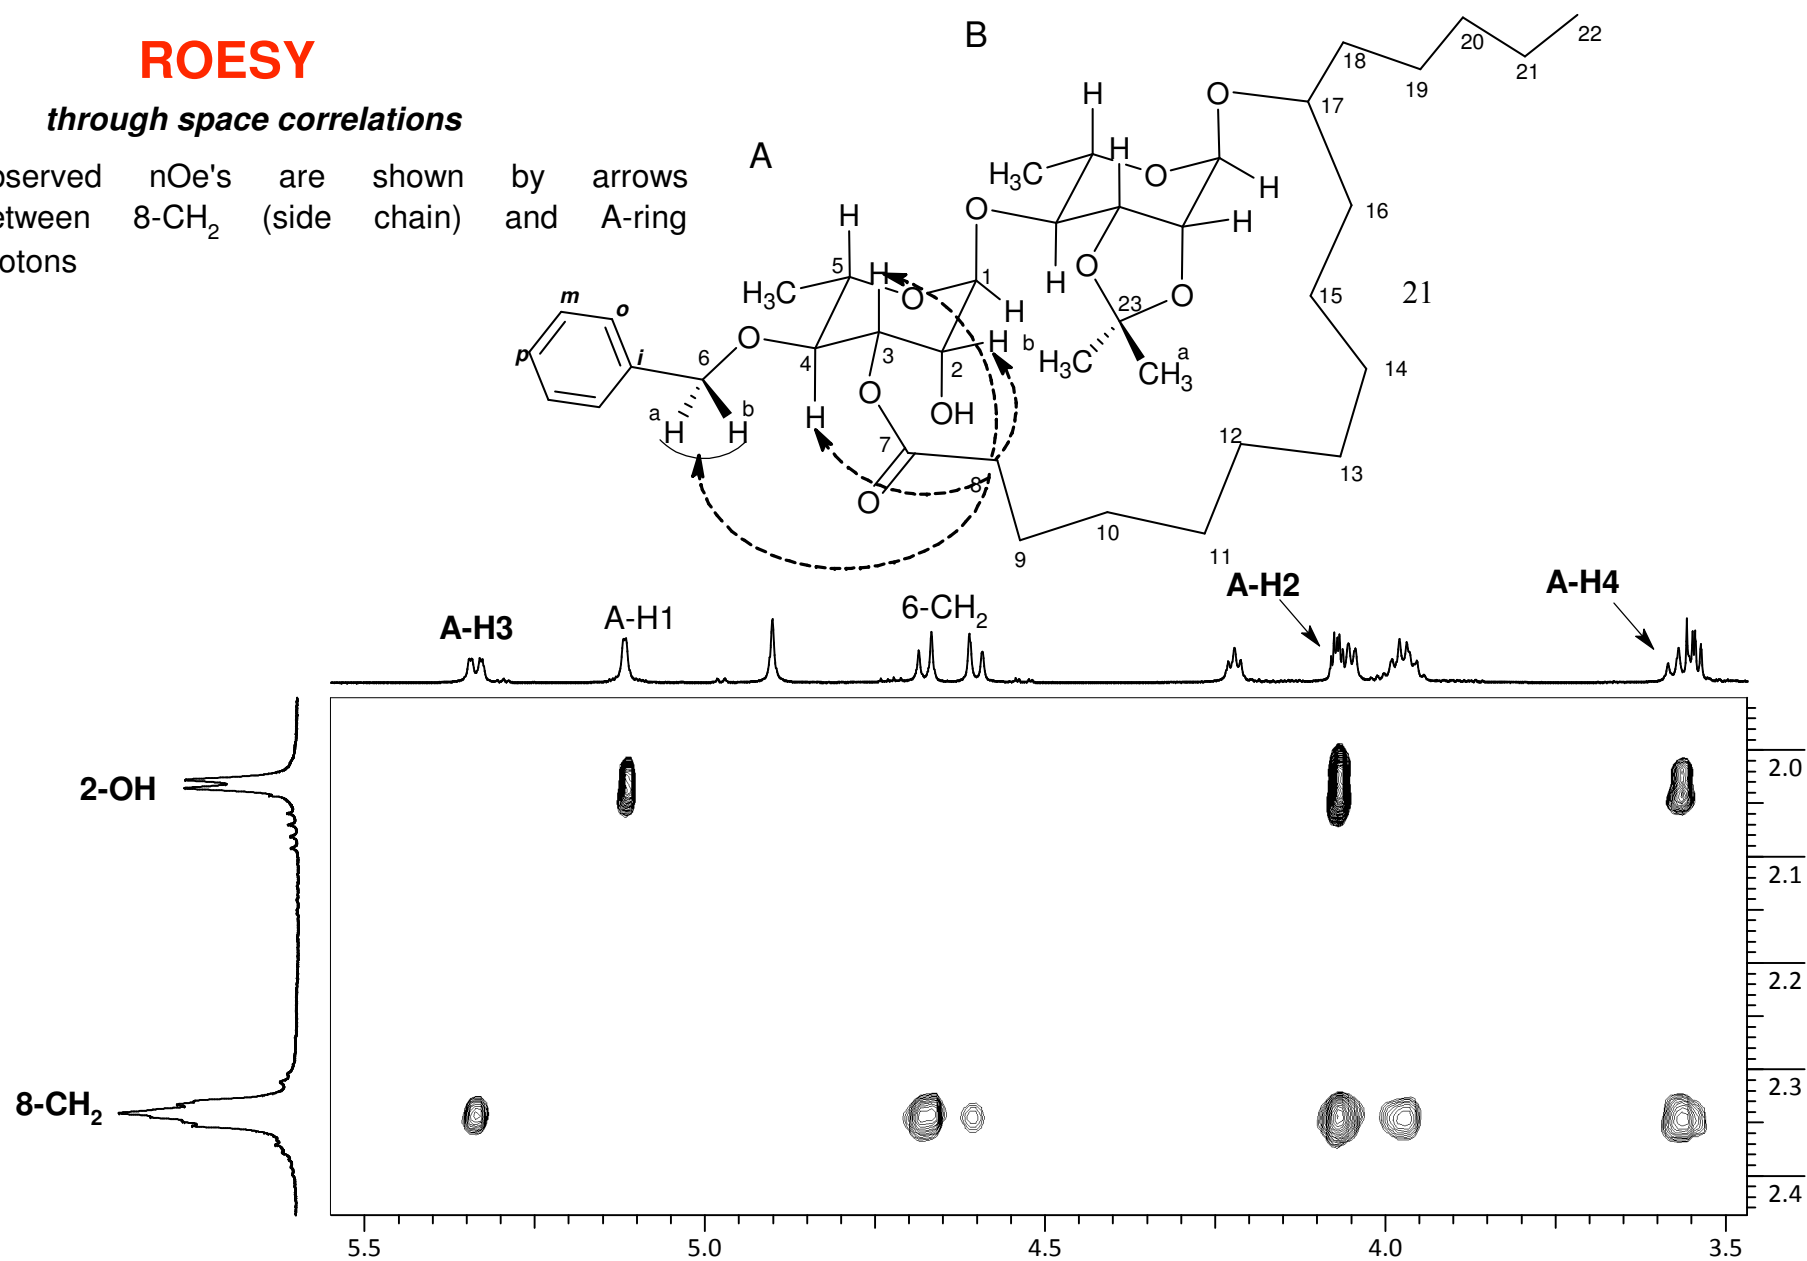



# ROESY

*through space correlations*

observed nOe's between A-H1 and B-ring protons are shown by dashed arrows

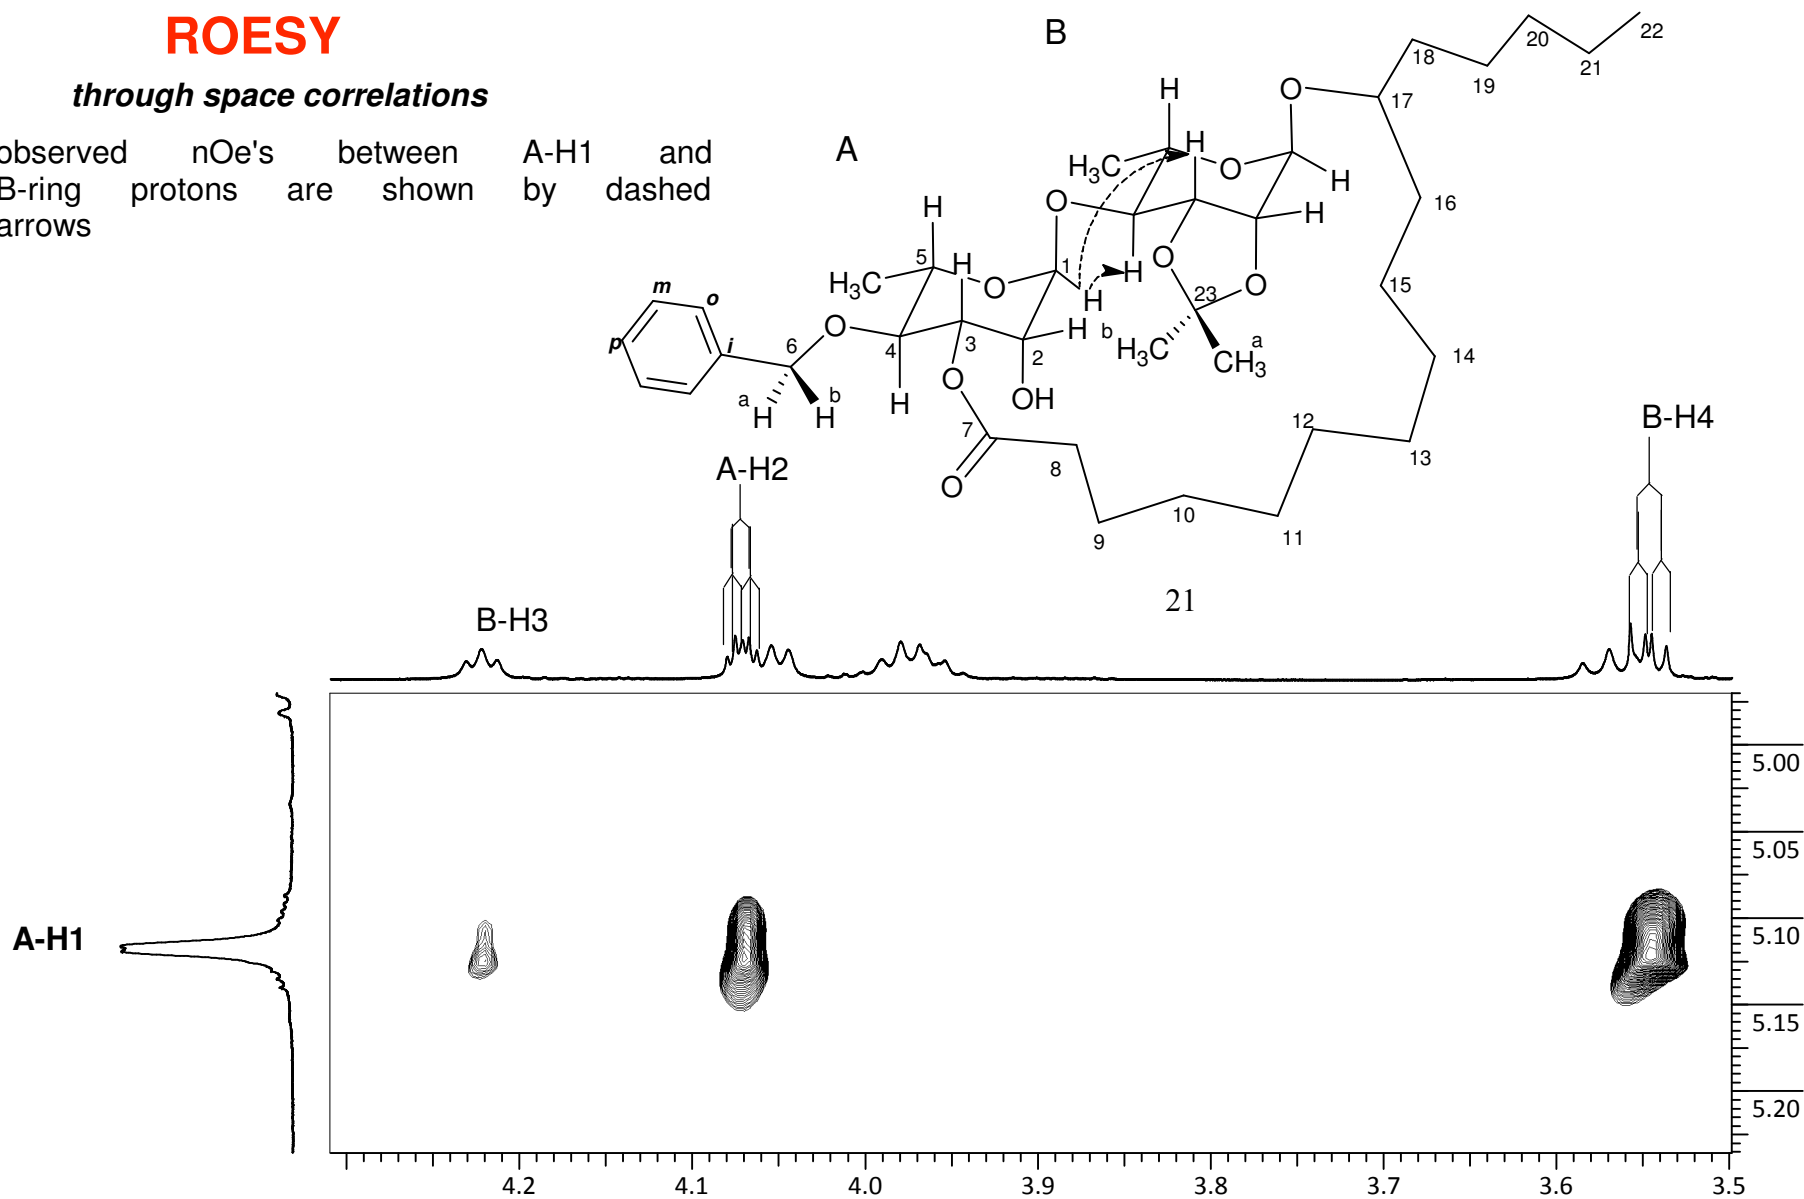

# Assignment of A-H4/A-C4

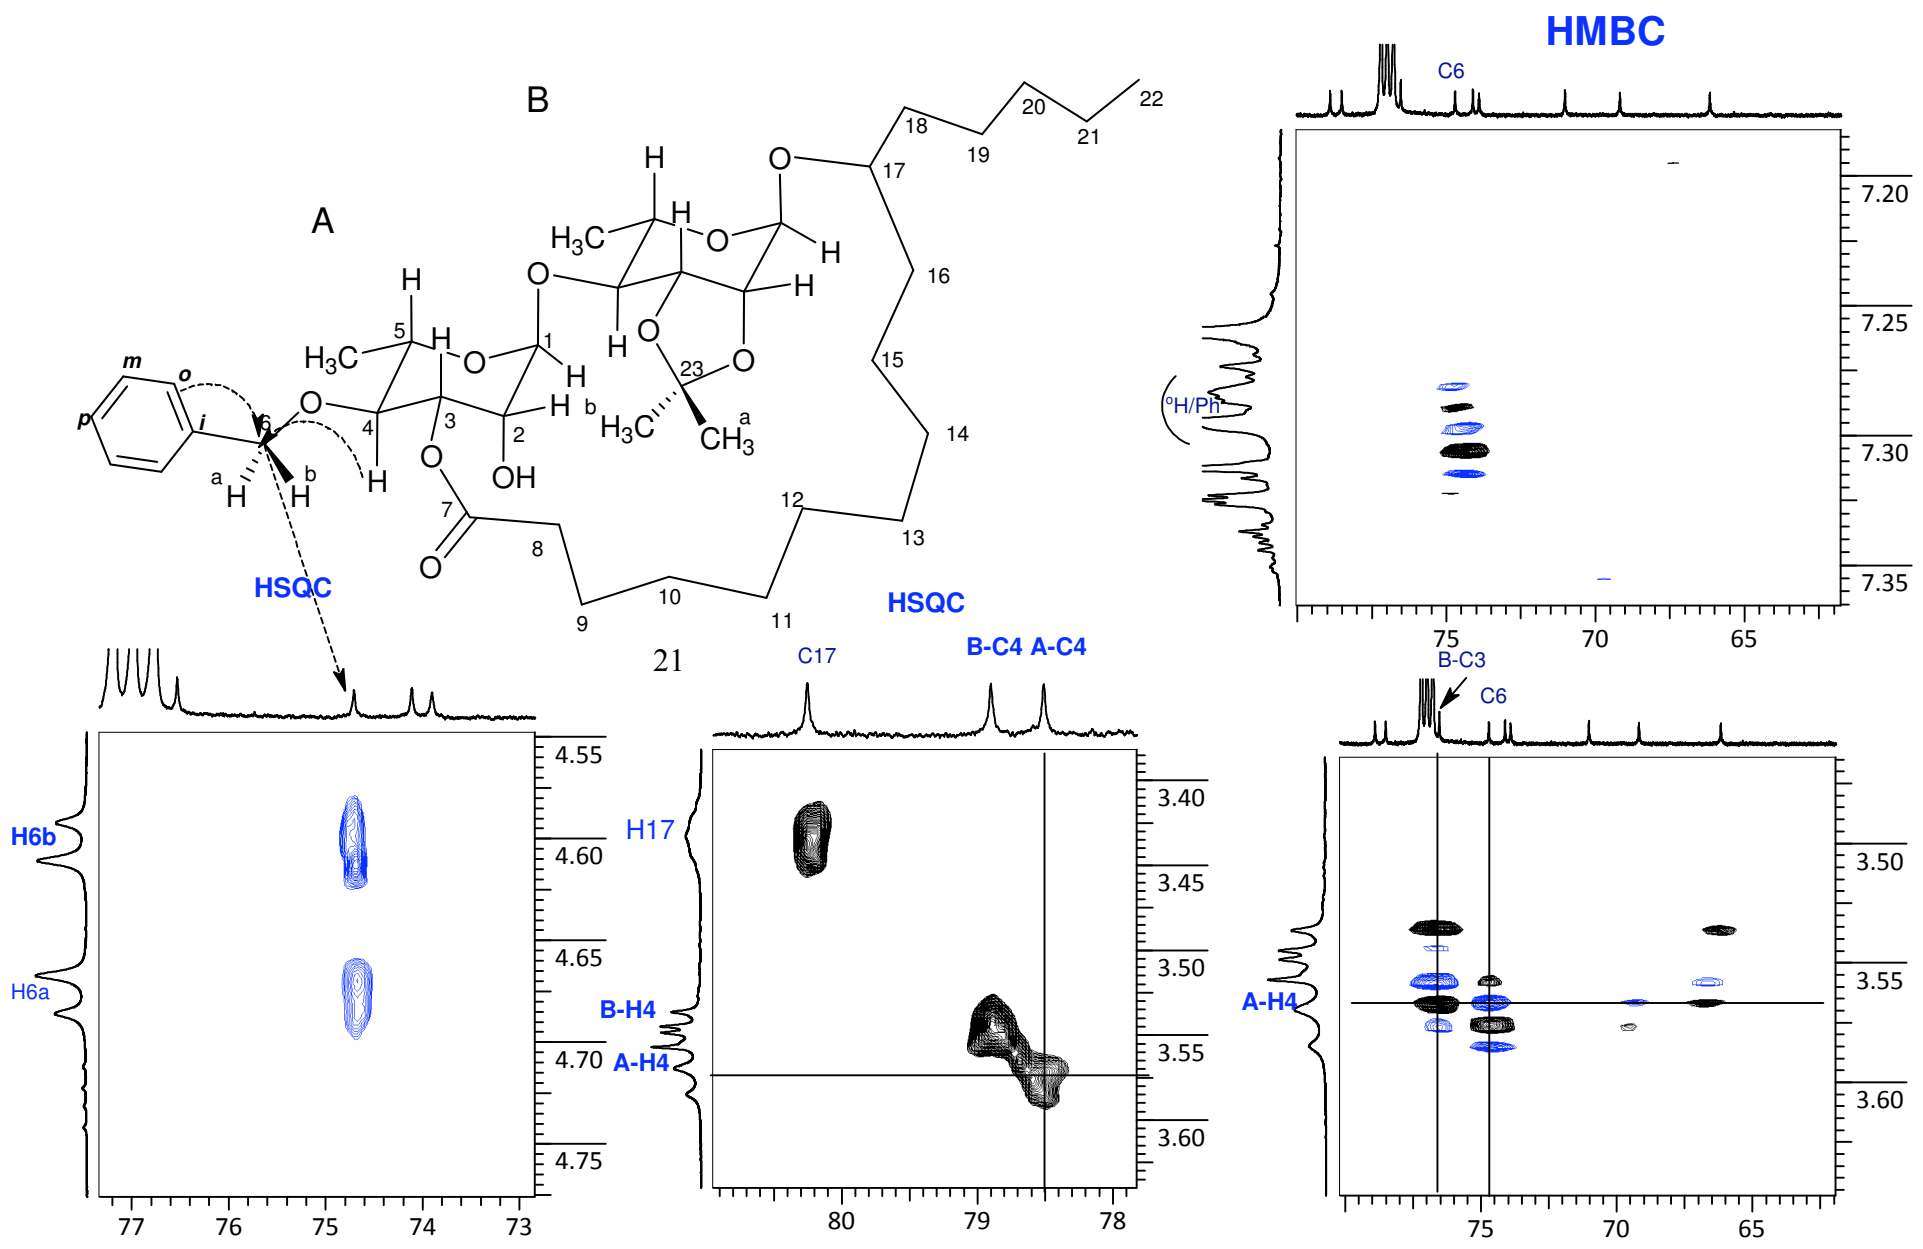

**gHSQCAD**  
One-bond correlations

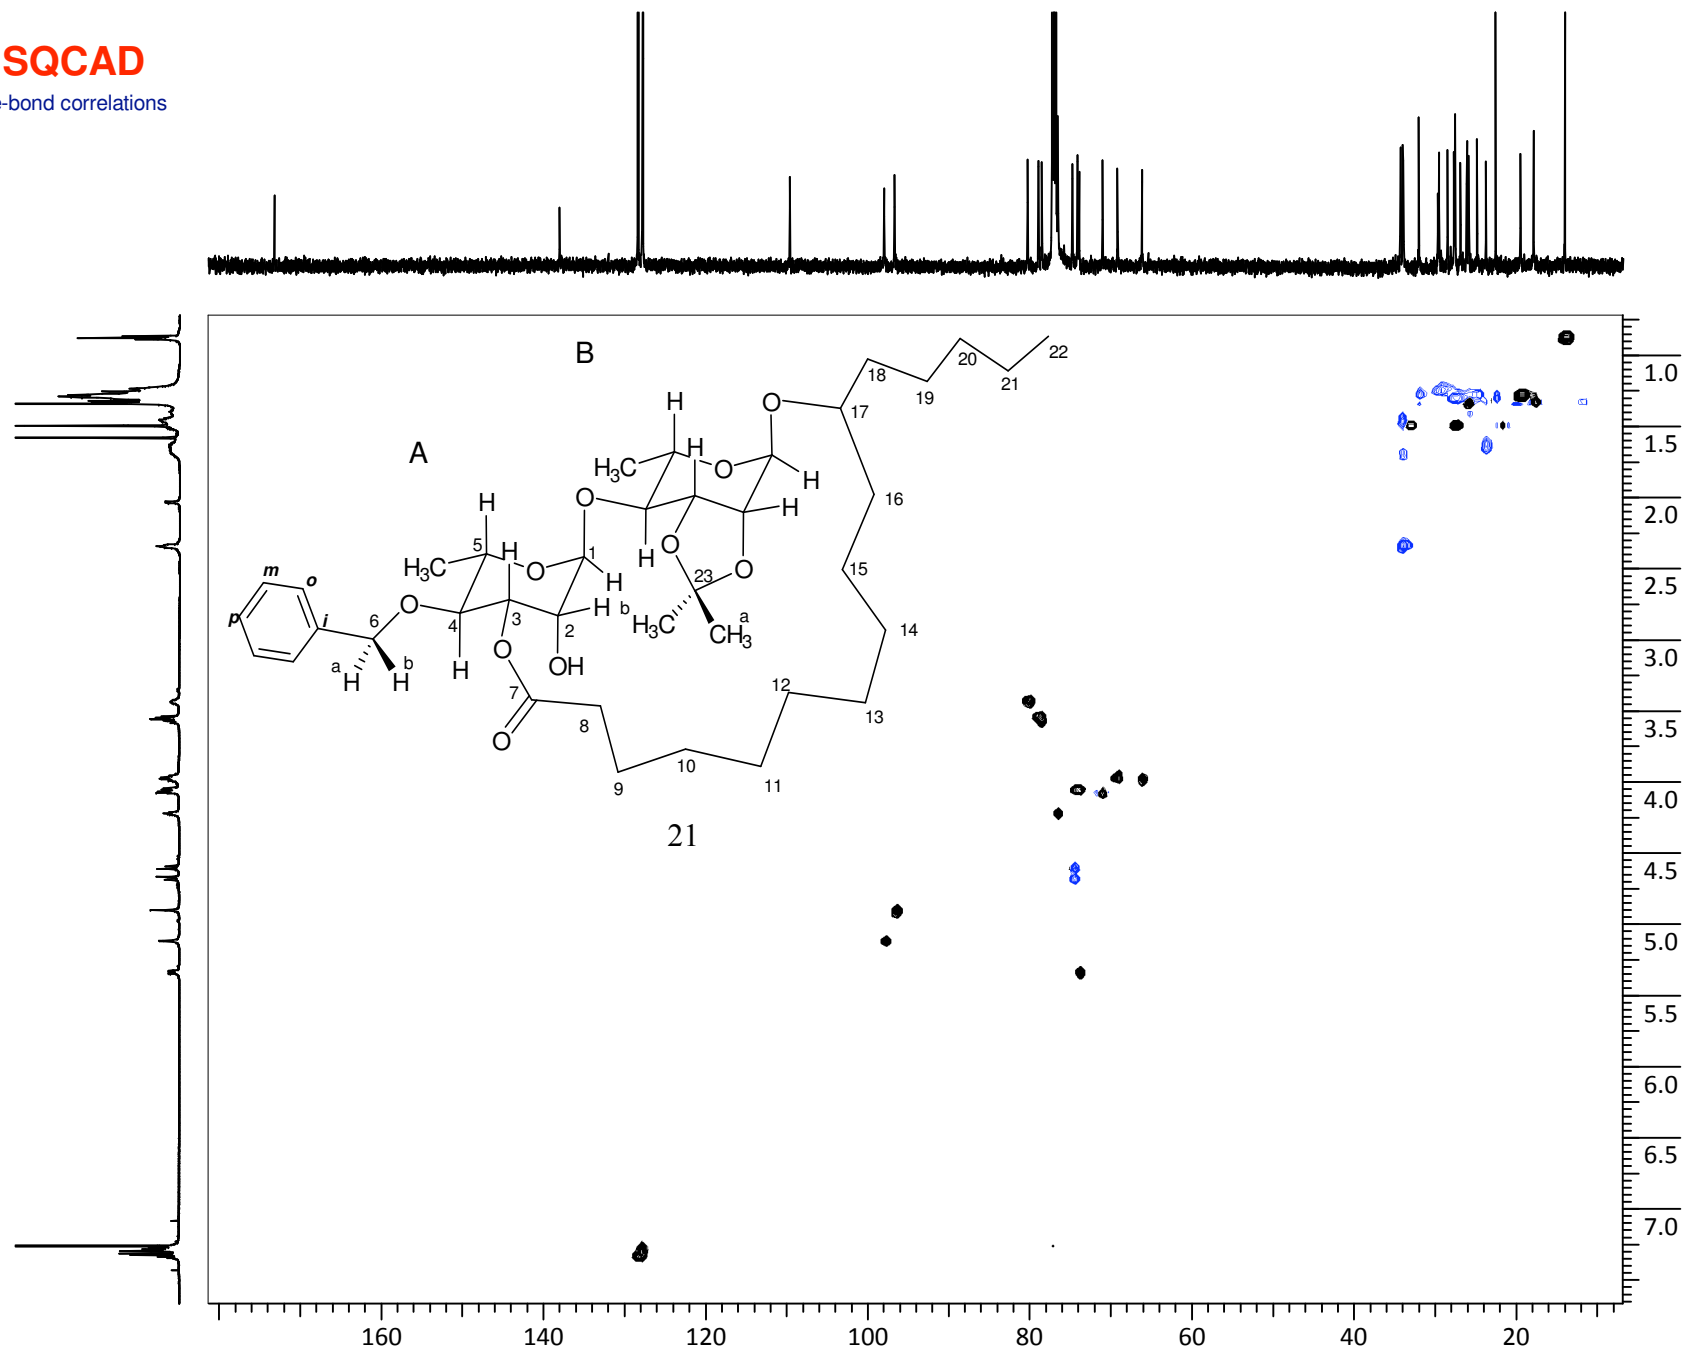

# gHMBCAD

Long-range correlations

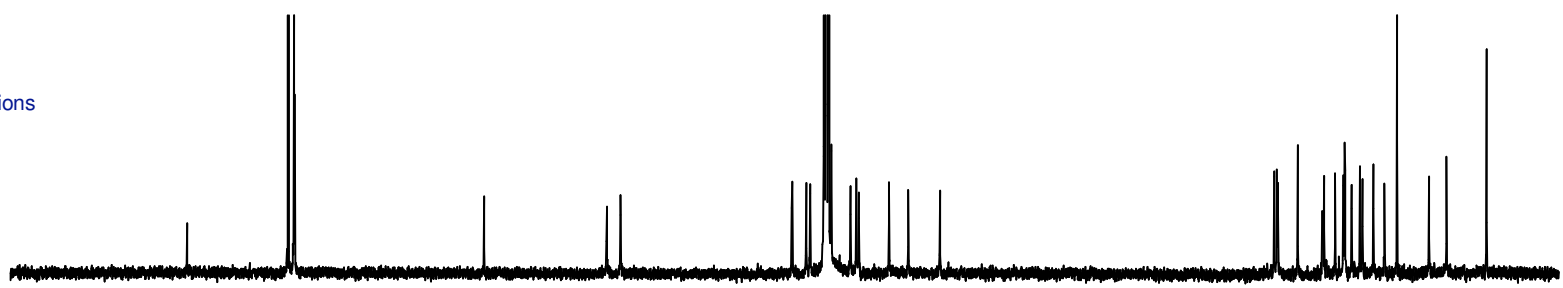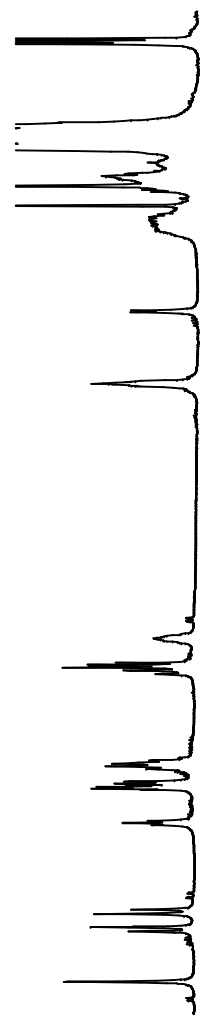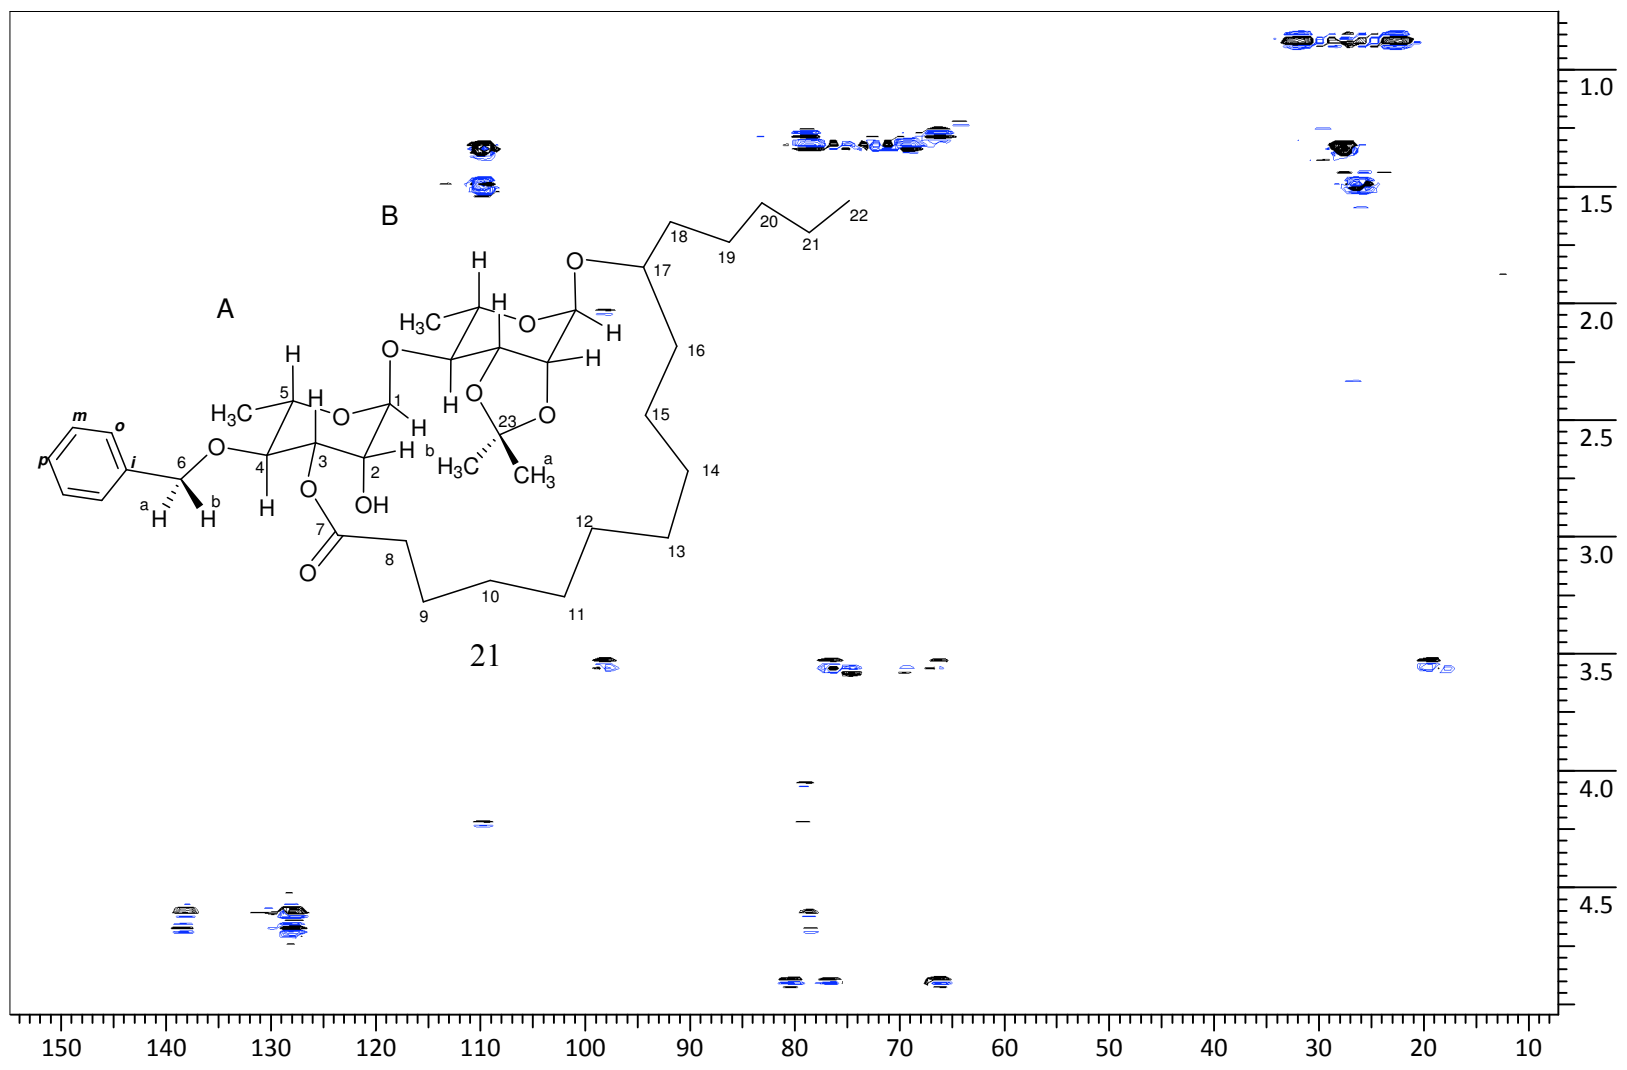

# gH2BCD two bond correlations between proton and carbon

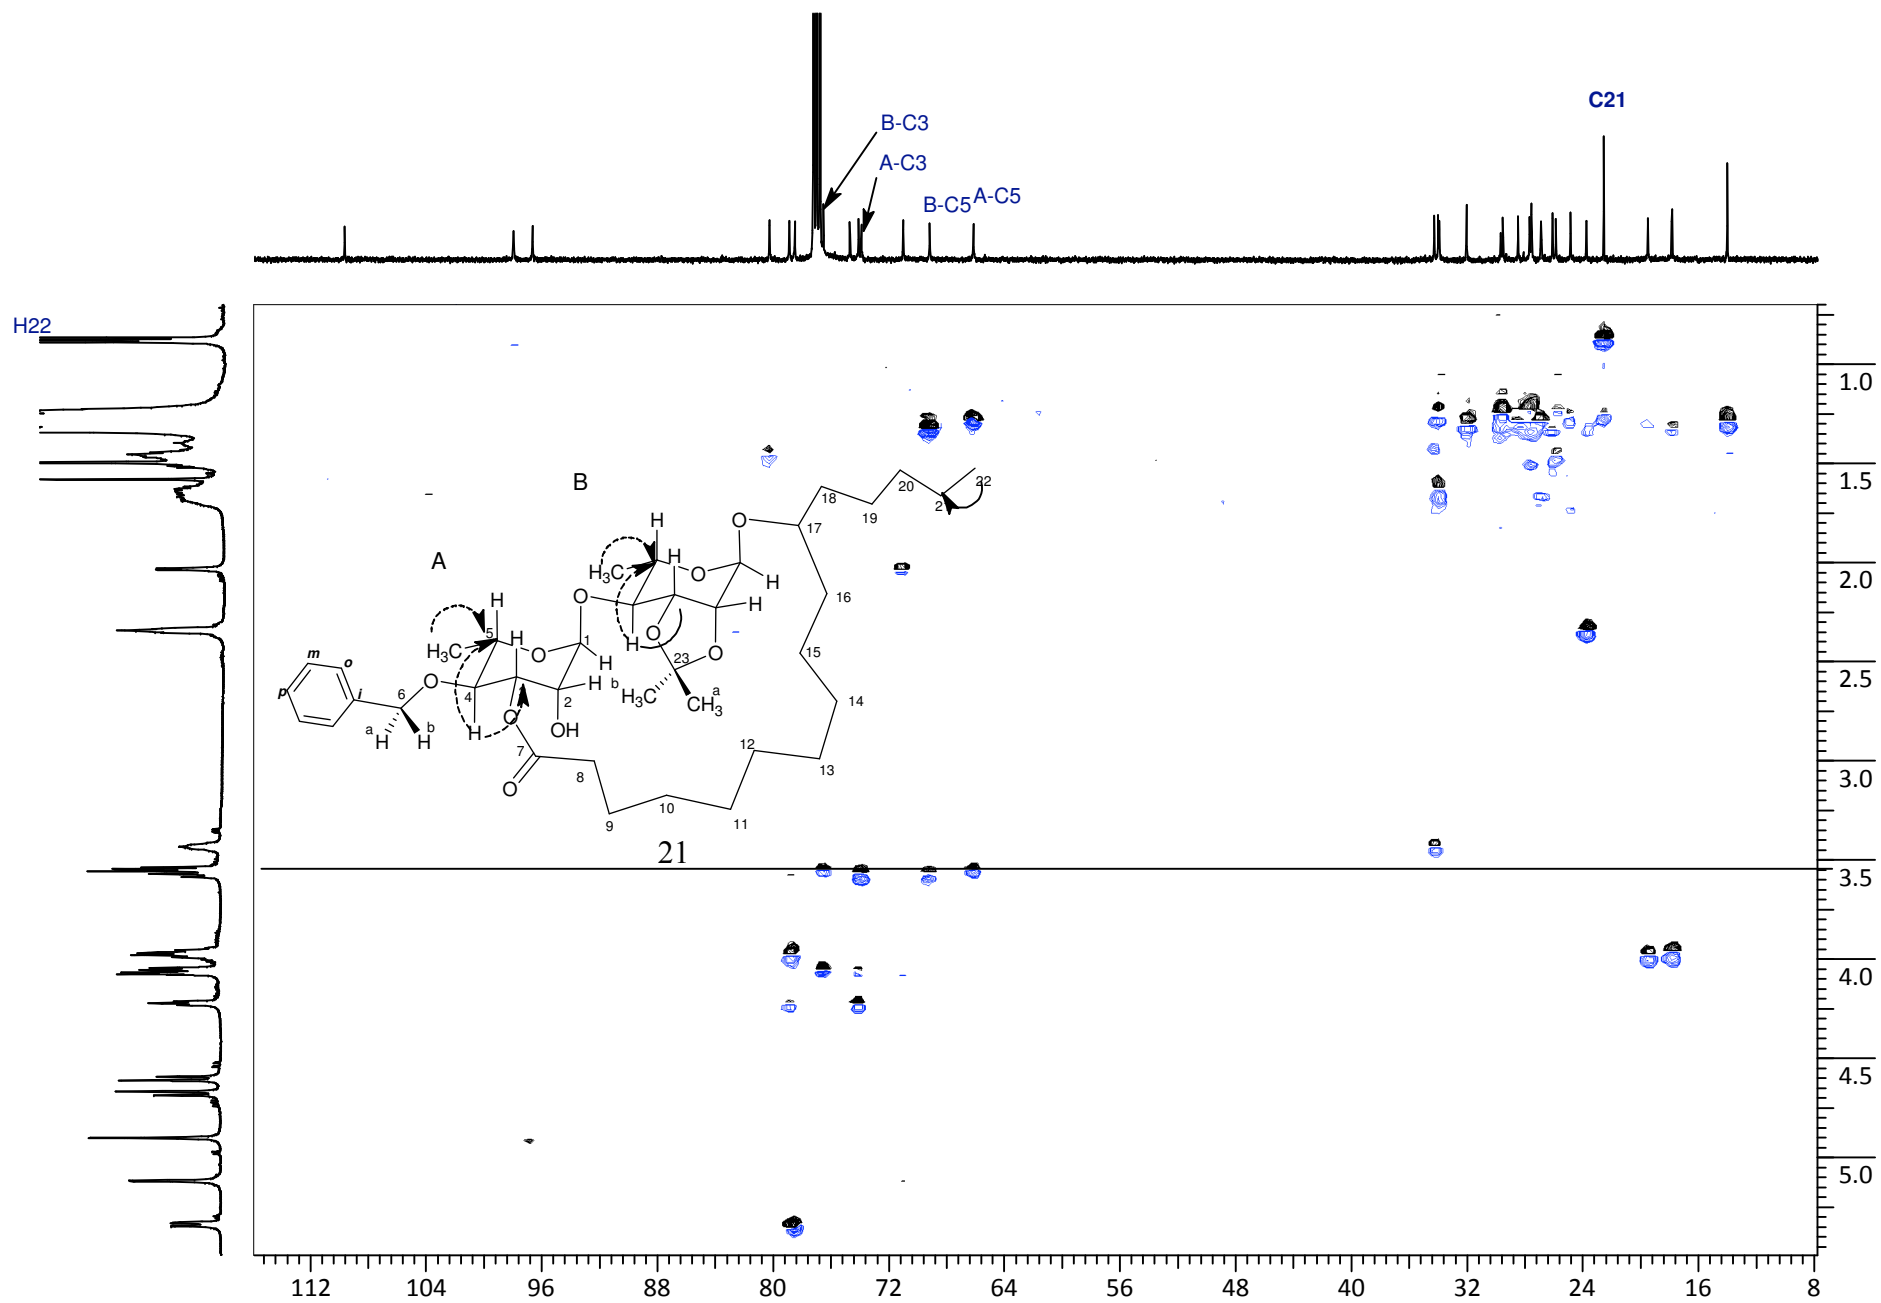

# gHSQCTOCSY

$^1\text{H}$ - $^1\text{H}$  and  $^{13}\text{C}$ - $^{13}\text{C}$  connectivities

(for compd 21)

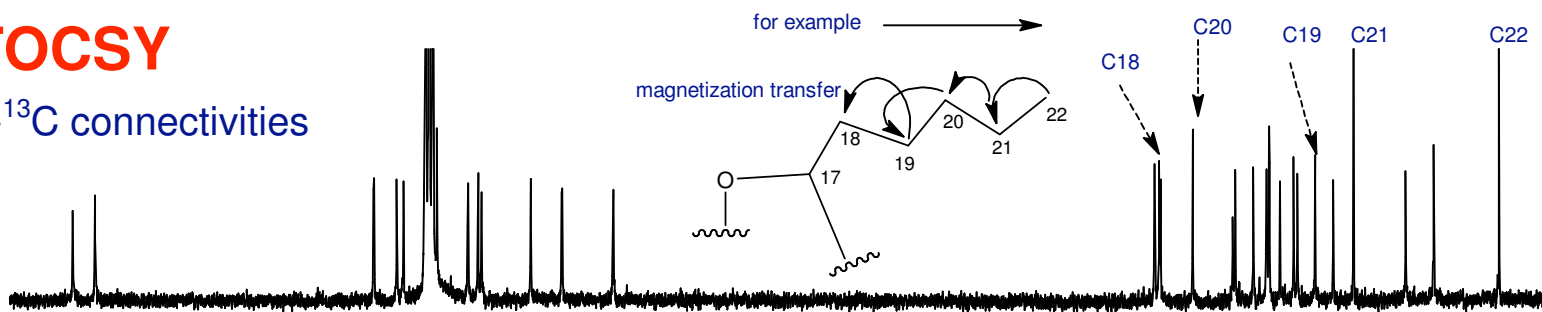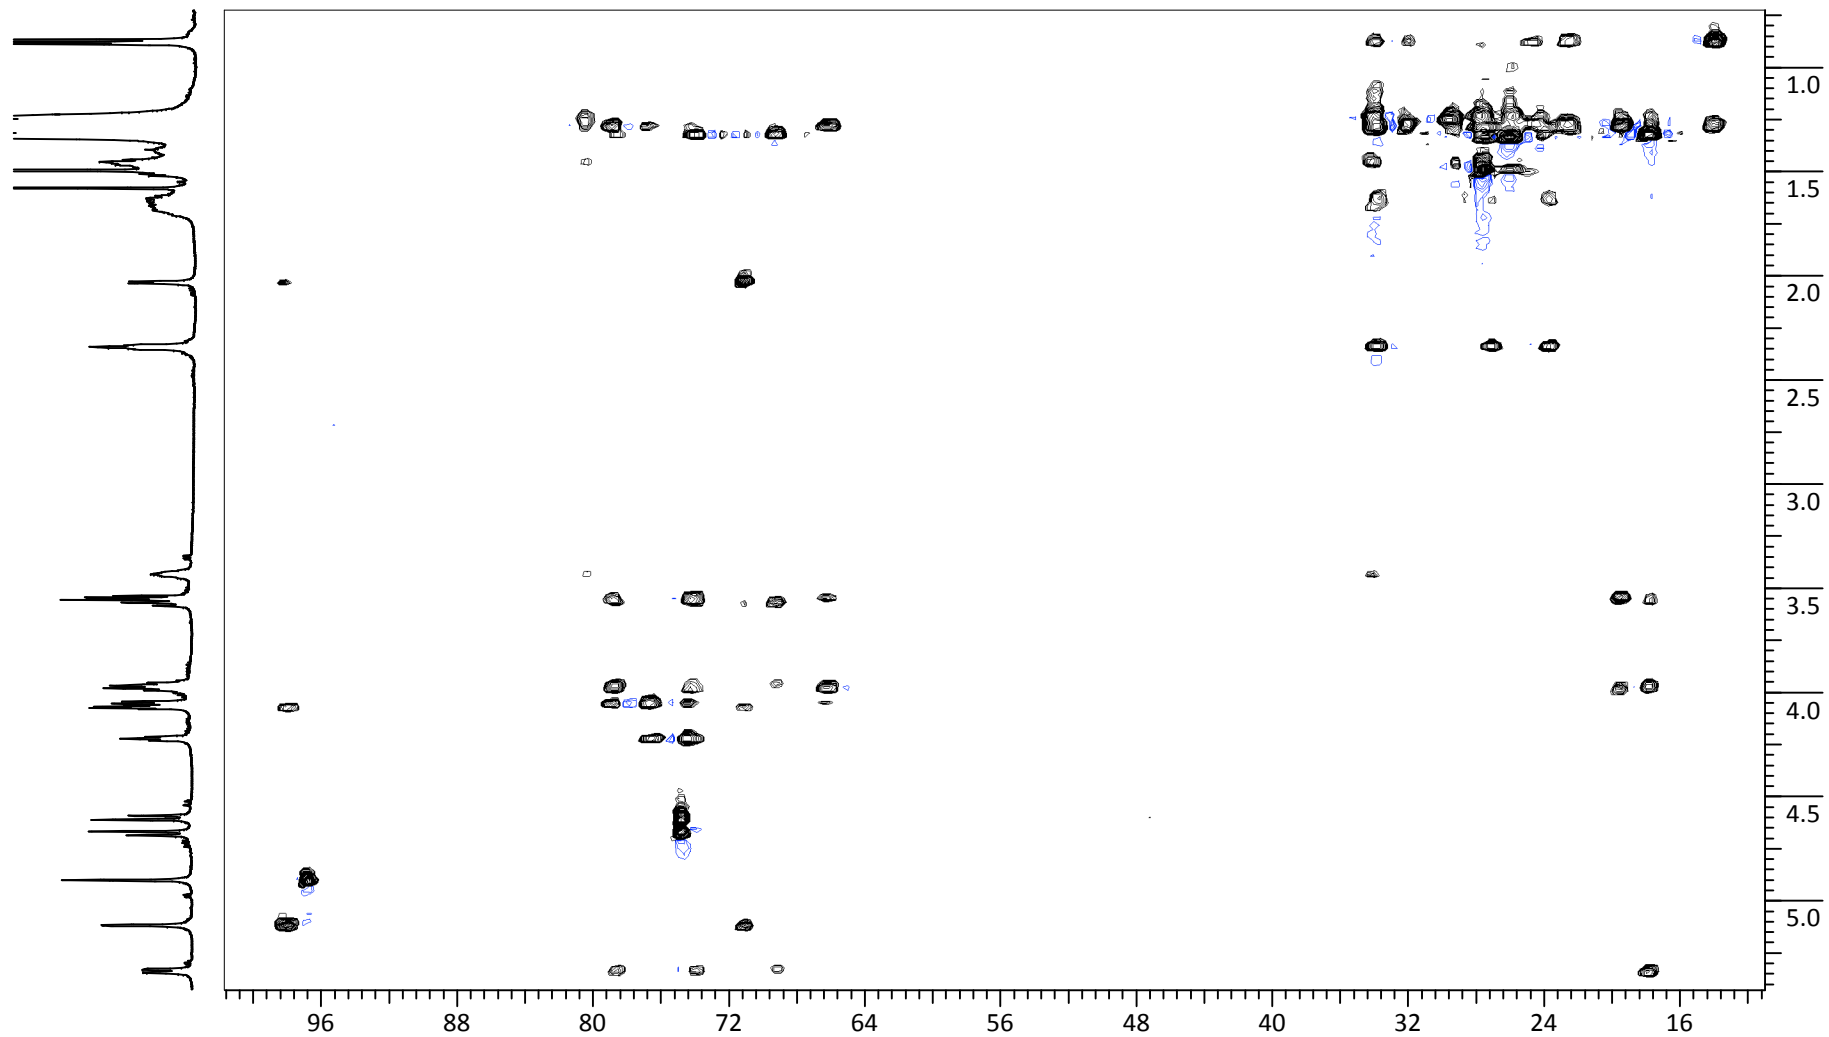

# gHSQCTOCSY

$^1\text{H}$ - $^1\text{H}$  and  $^{13}\text{C}$ - $^{13}\text{C}$  connectivities

(for compd 21)

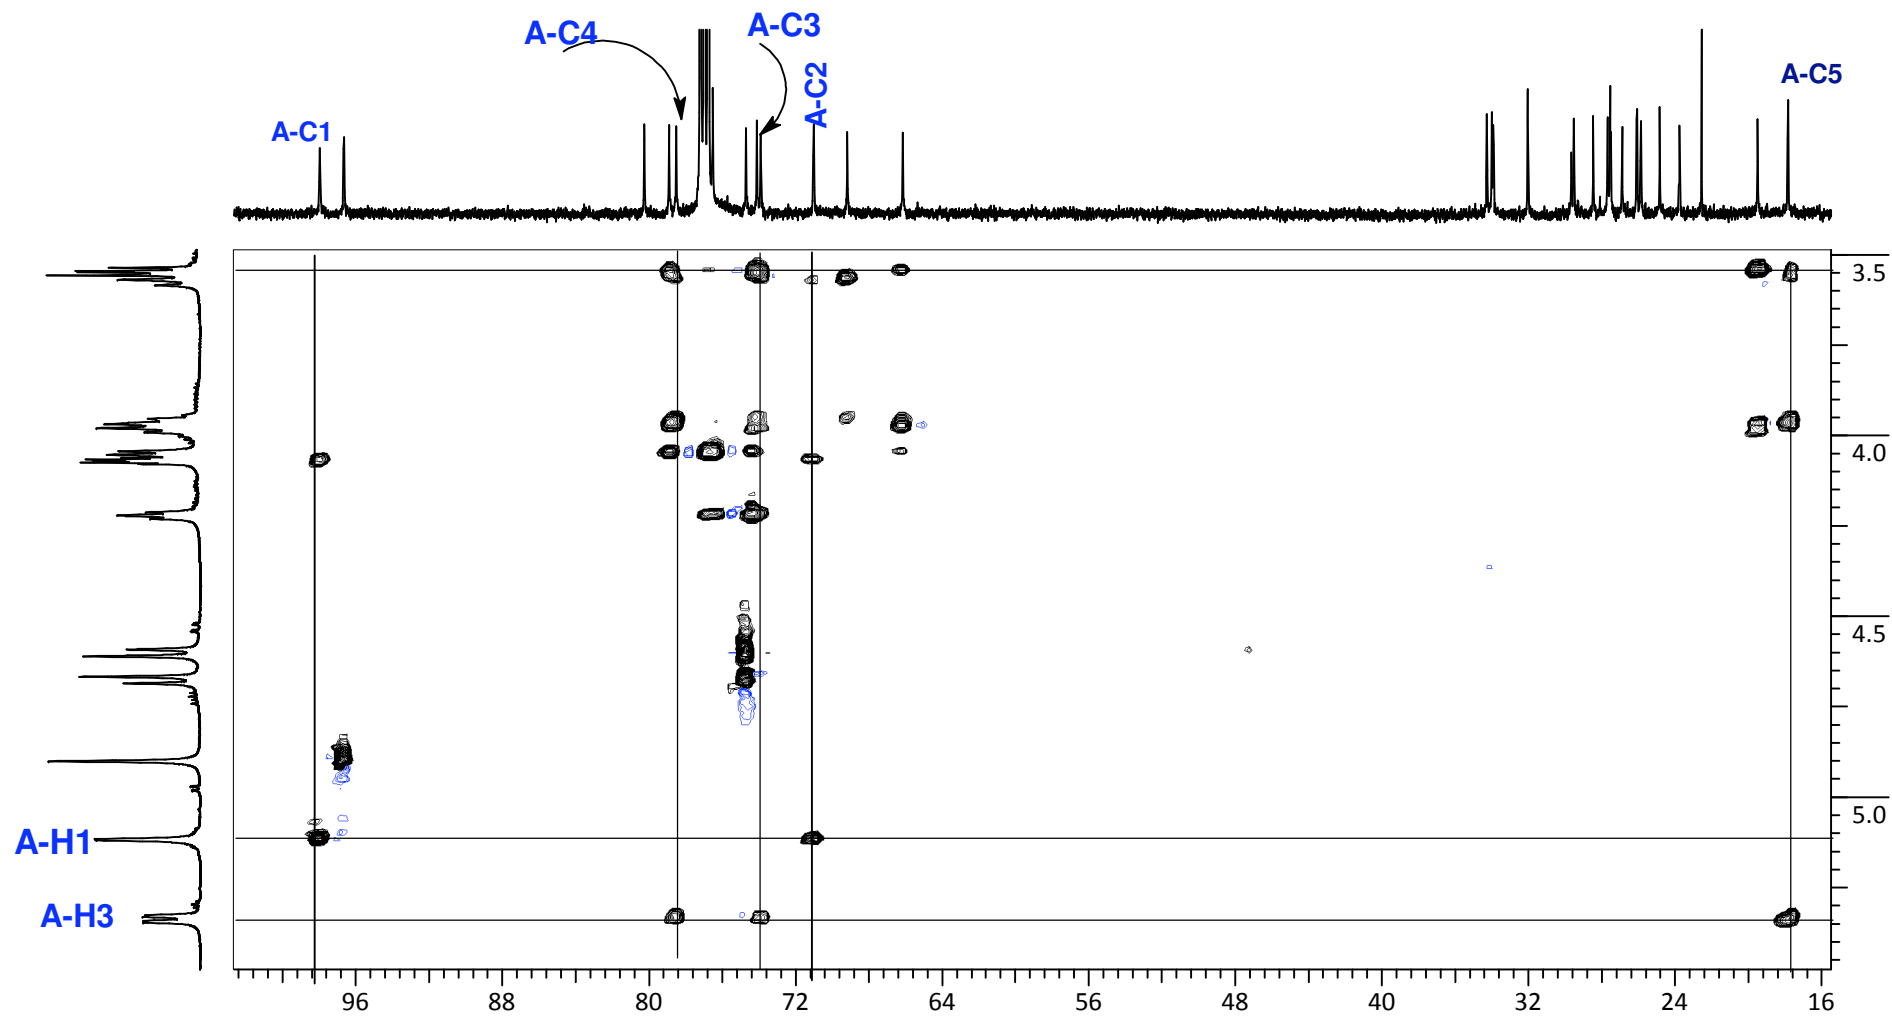

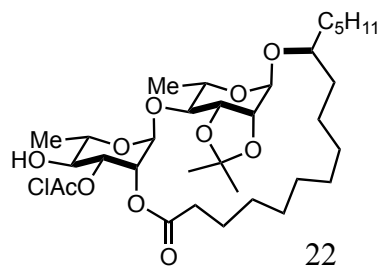

<sup>1</sup>H NMR (benzene-*d*<sub>6</sub>, 400 MHz)

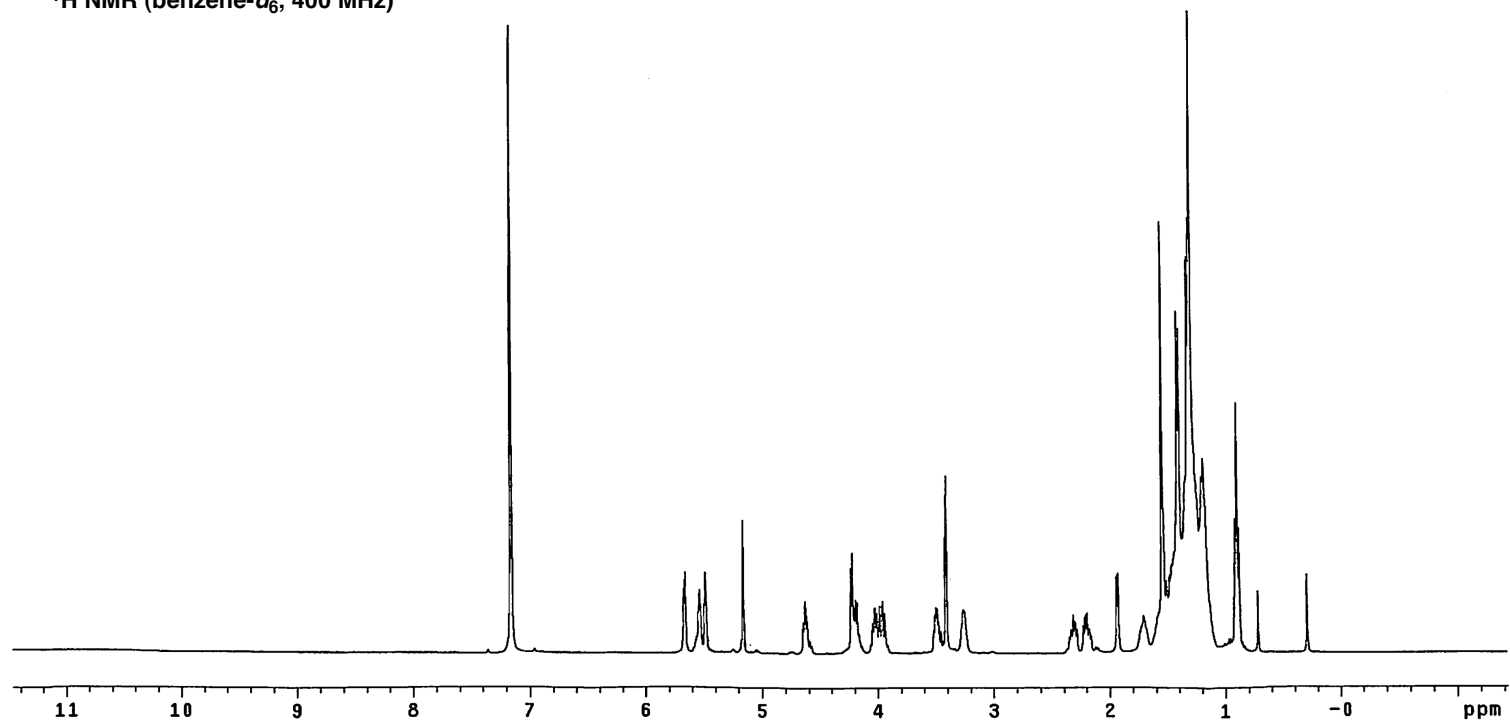



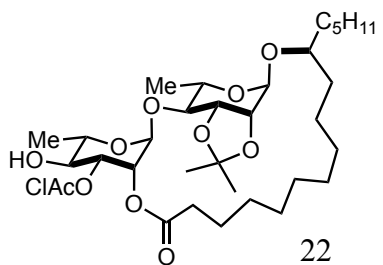

$^{13}\text{C}$  NMR ( $\text{CDCl}_3$ , 100 MHz)

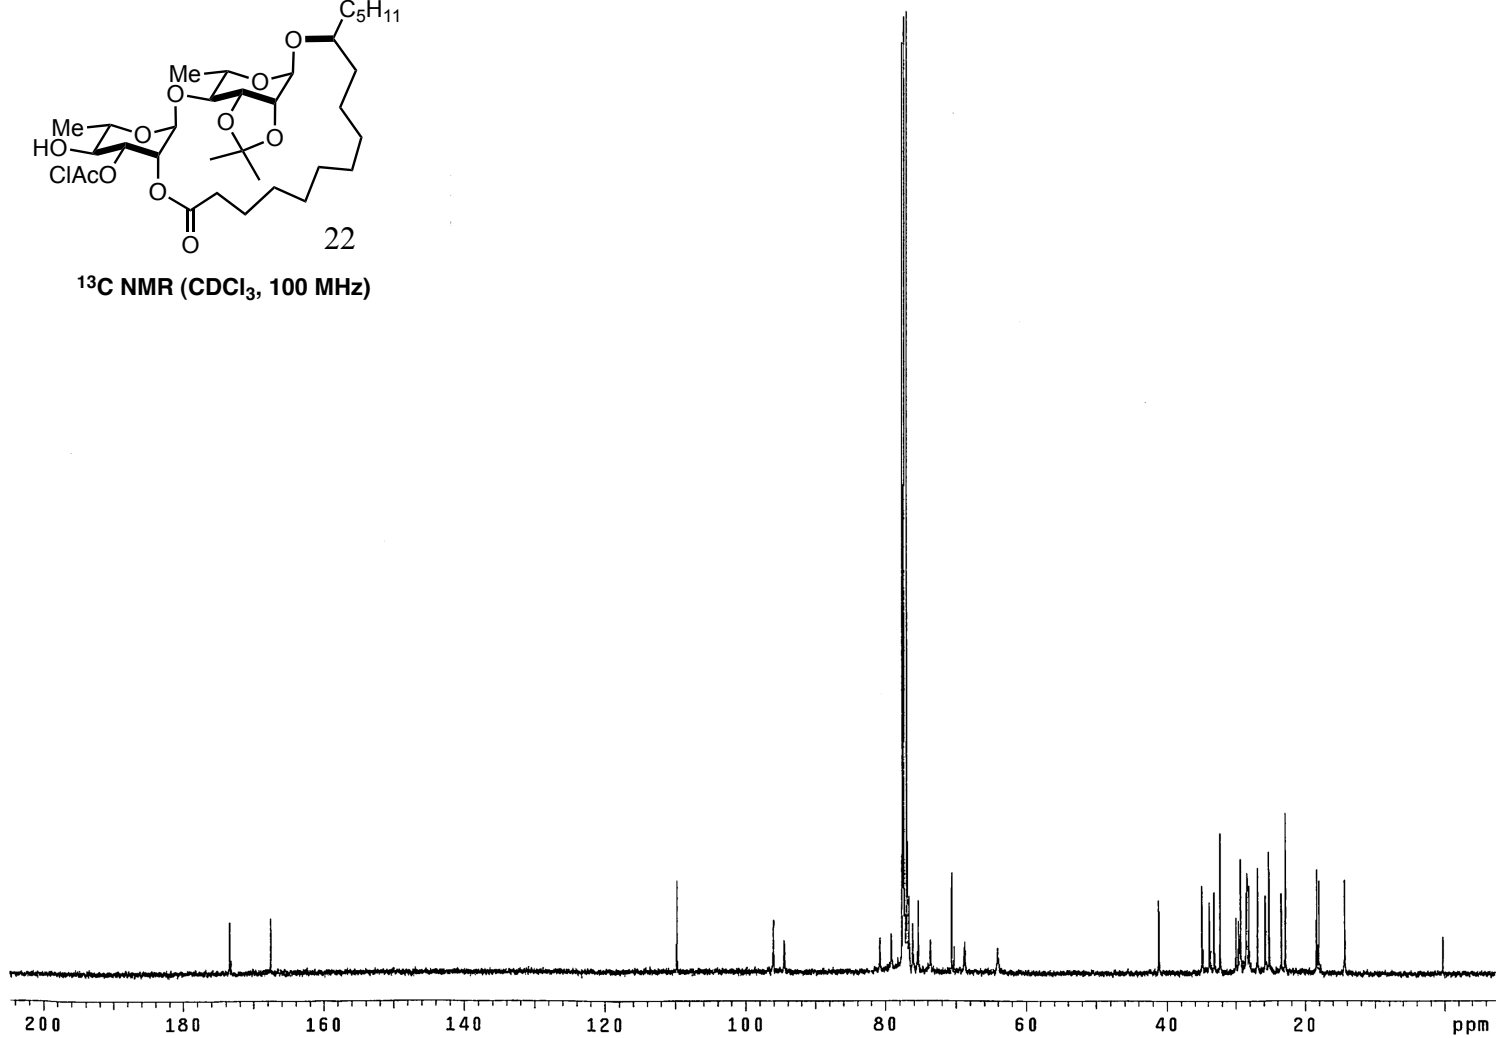

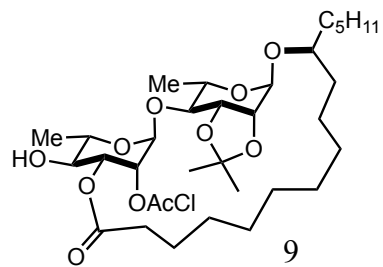

<sup>1</sup>H NMR (benzene-*d*<sub>6</sub>, 400 MHz)

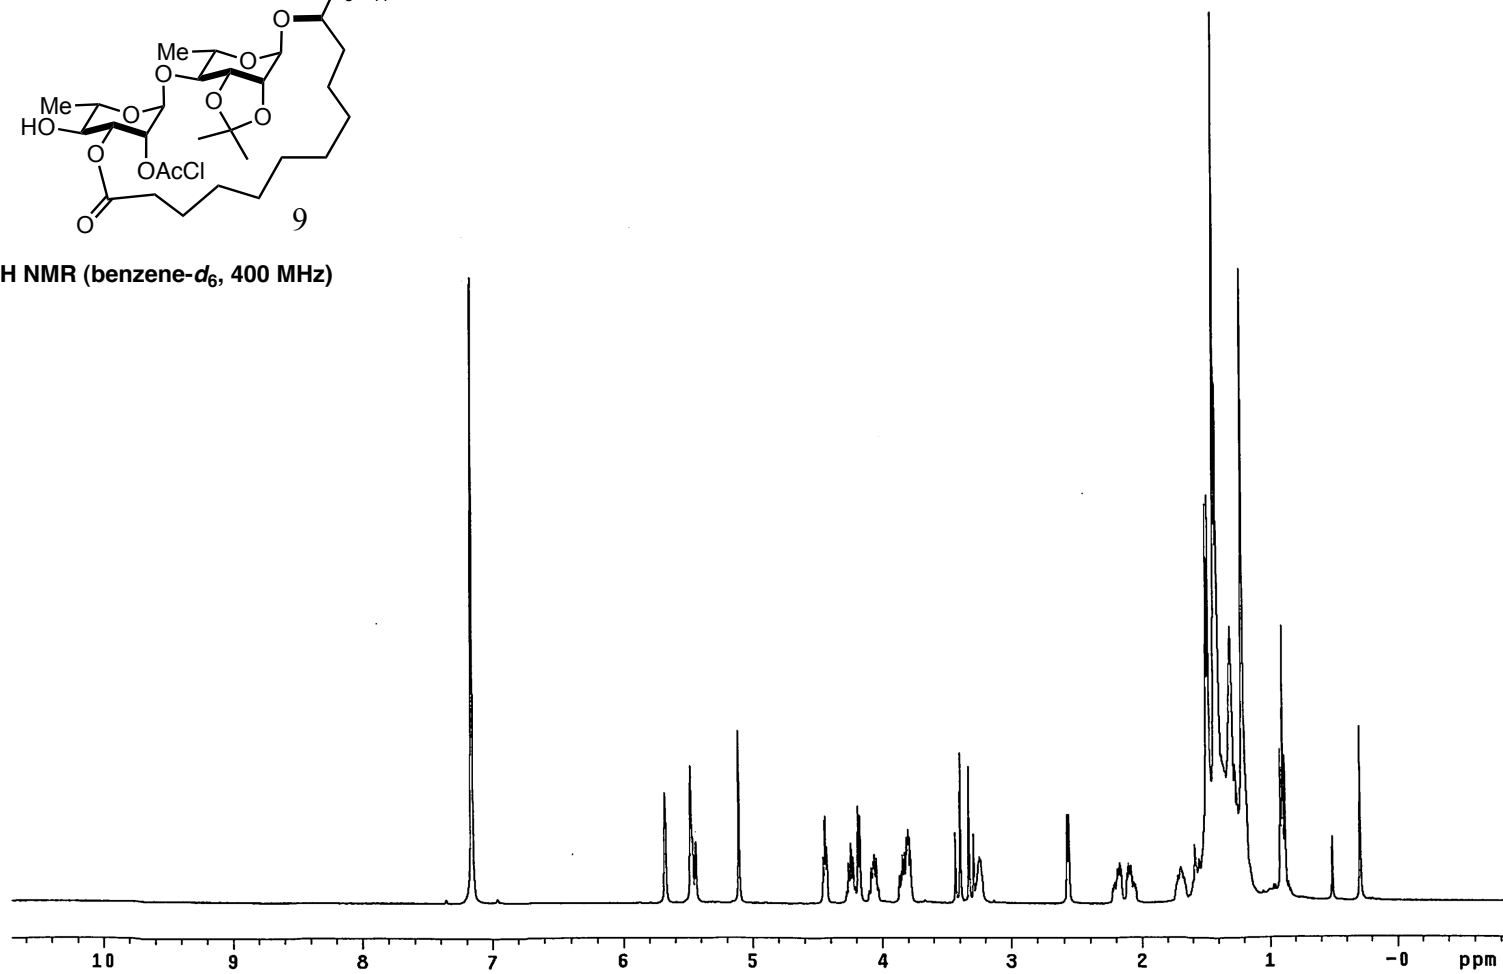

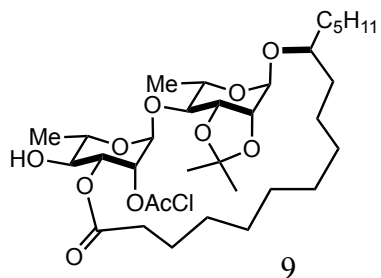

$^{13}\text{C}$  NMR ( $\text{CDCl}_3$ , 100 MHz)

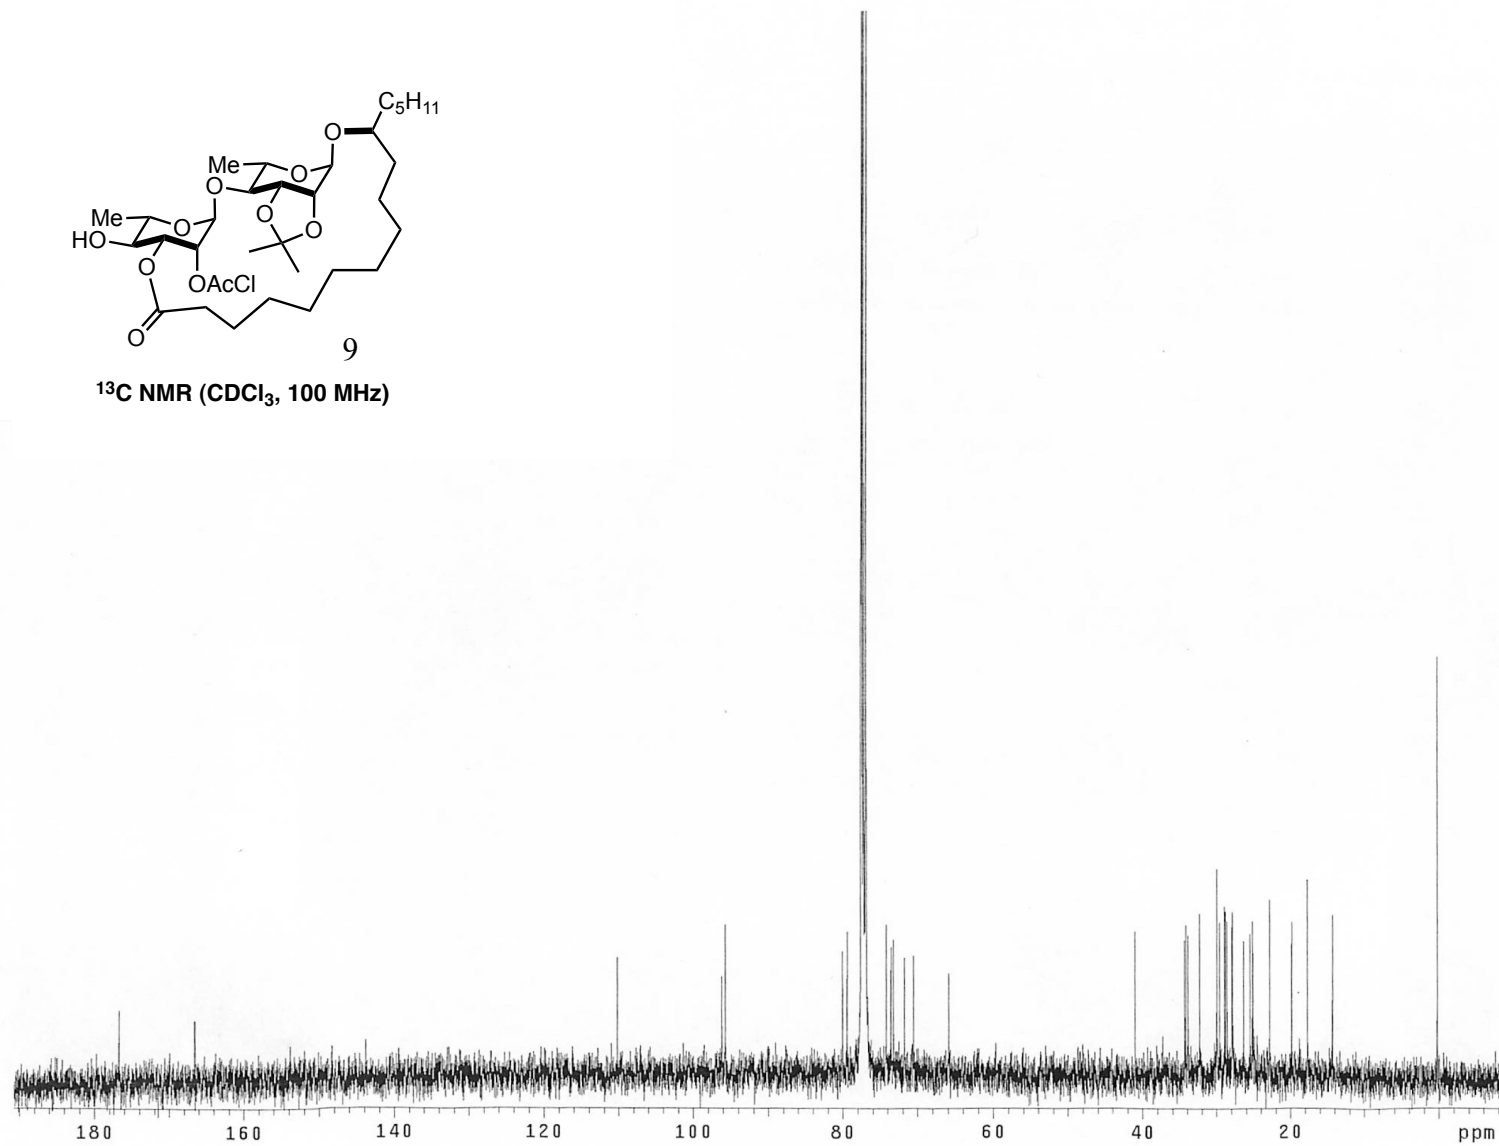

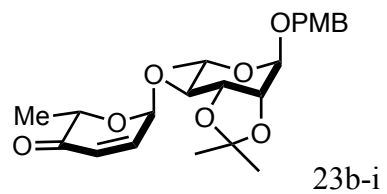

$^1\text{H NMR}$  ( $\text{CDCl}_3$ , 400 MHz)

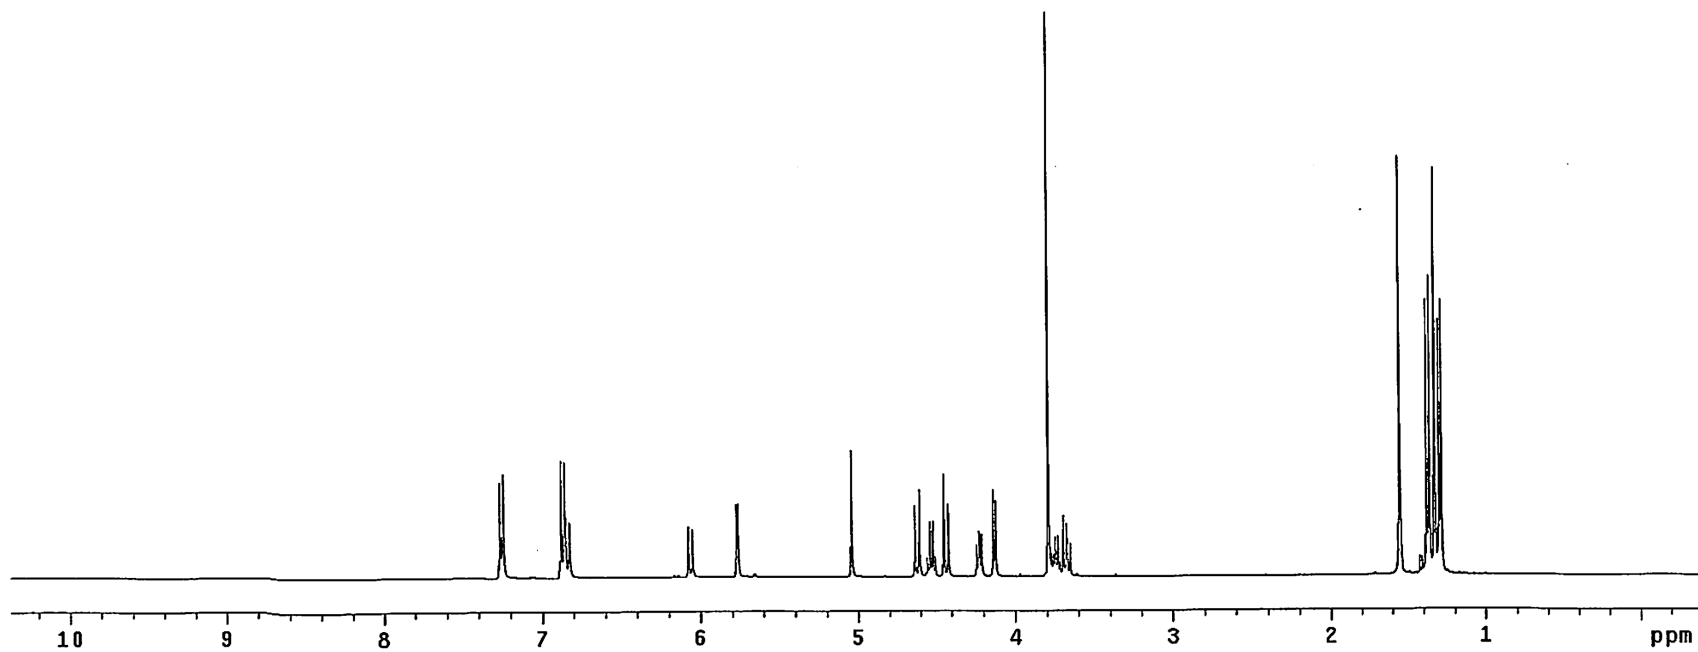

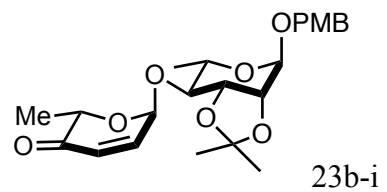

<sup>13</sup>C NMR (CDCl<sub>3</sub>, 100 MHz)

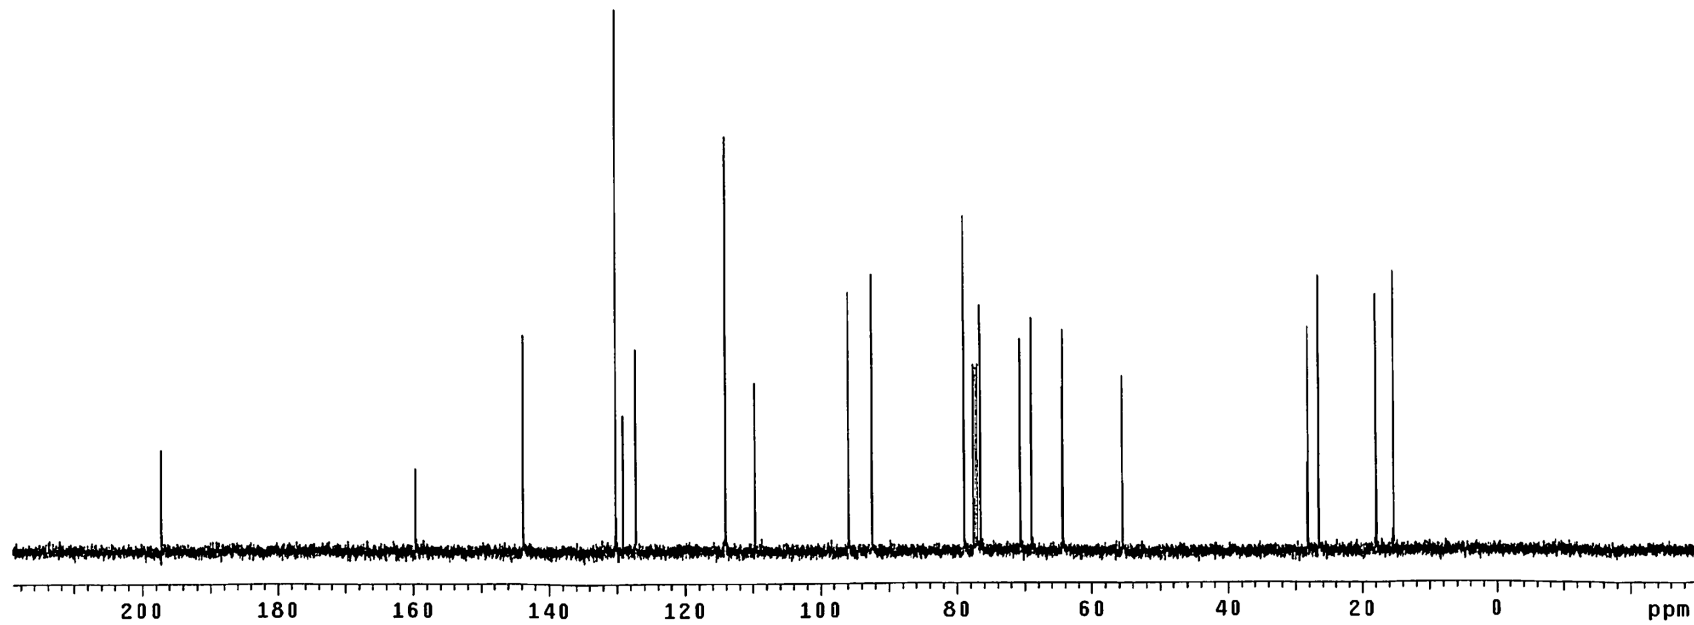

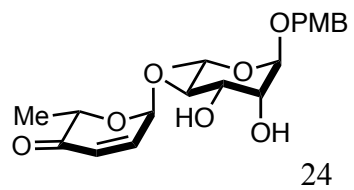

<sup>1</sup>H NMR (CDCl<sub>3</sub>, 400 MHz)

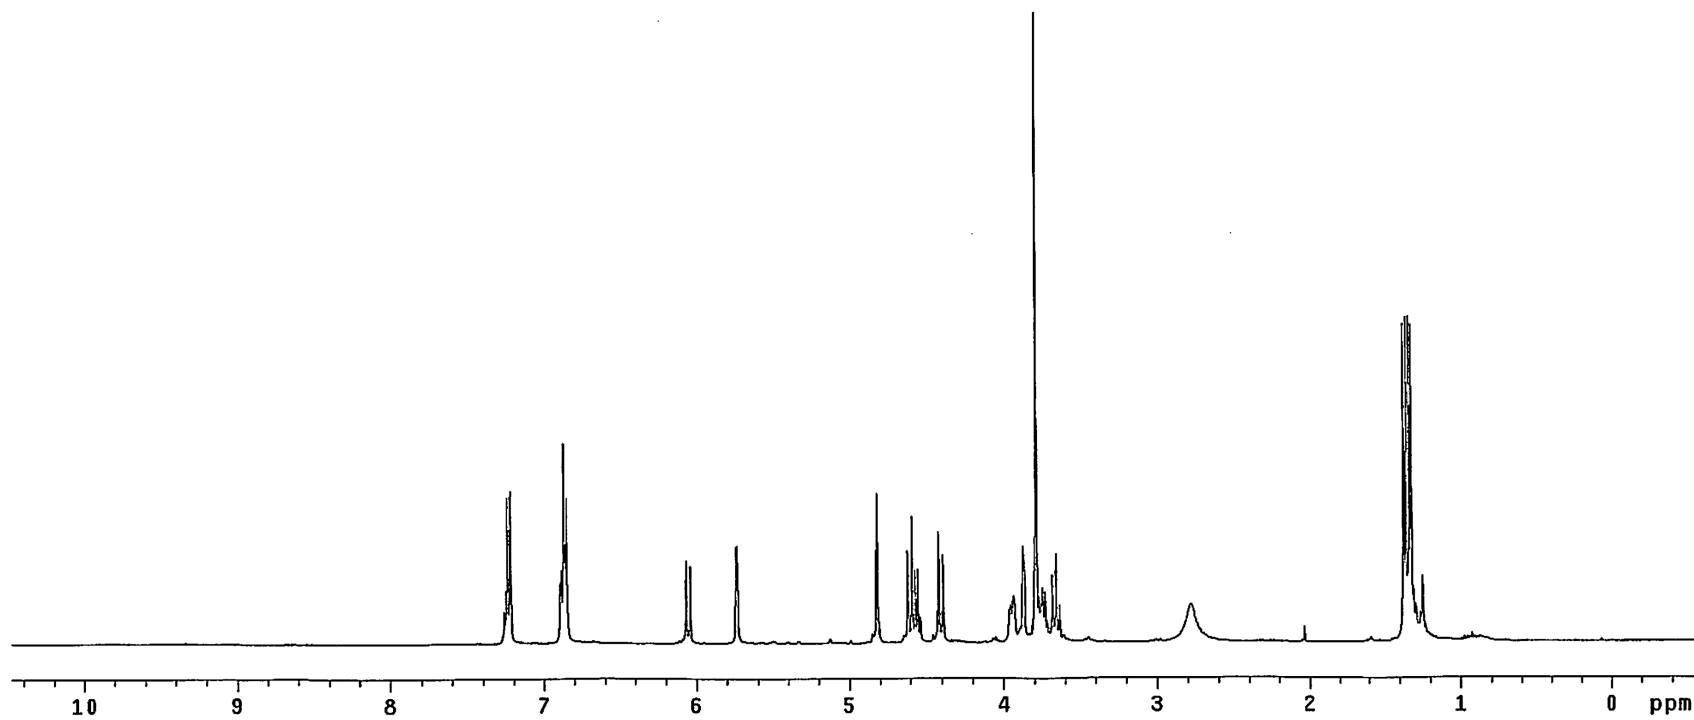

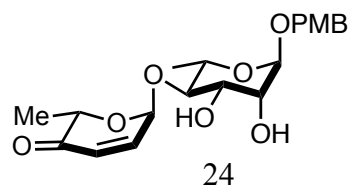

$^{13}\text{C}$  NMR ( $\text{CDCl}_3$ , 100 MHz)

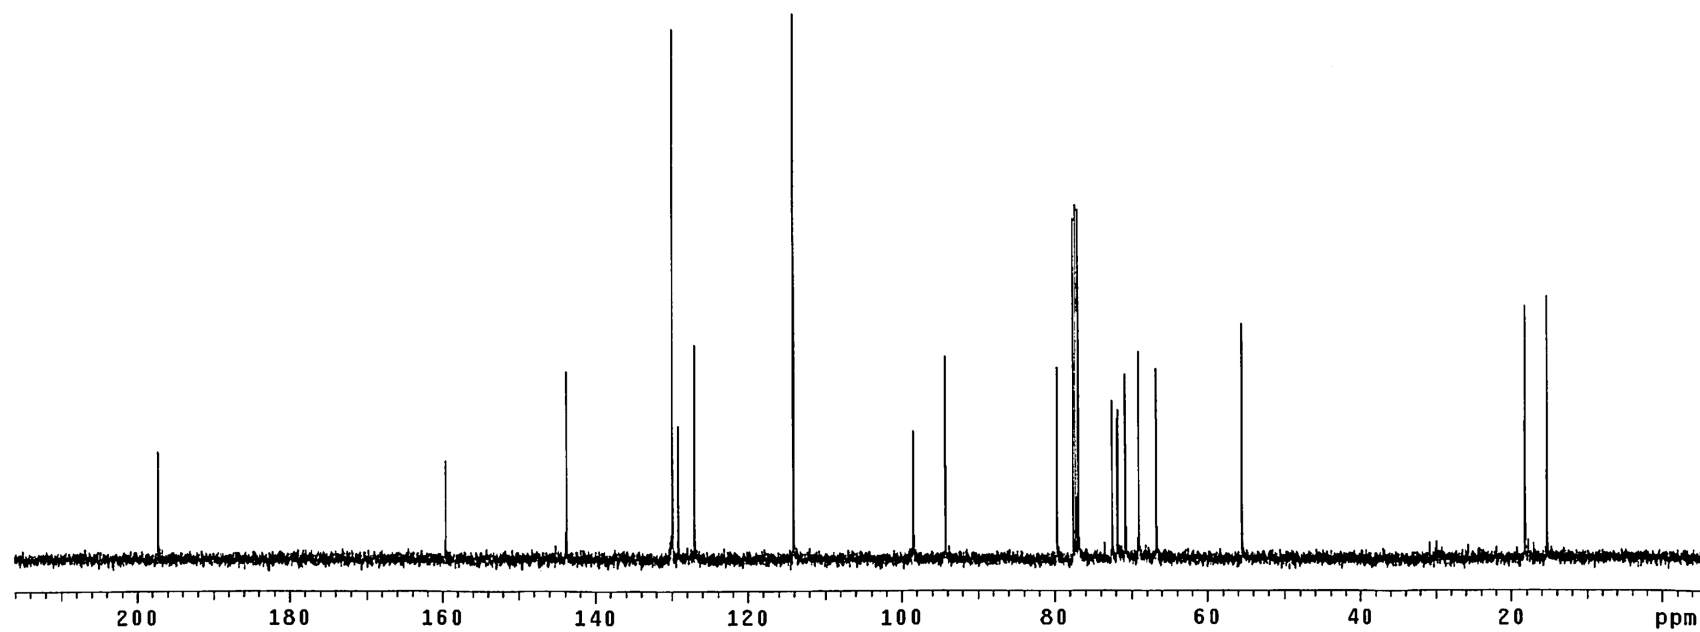

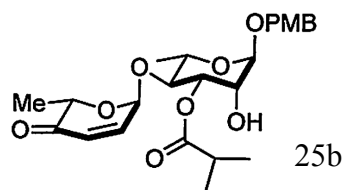

<sup>1</sup>H NMR (CDCl<sub>3</sub>, 400 MHz)

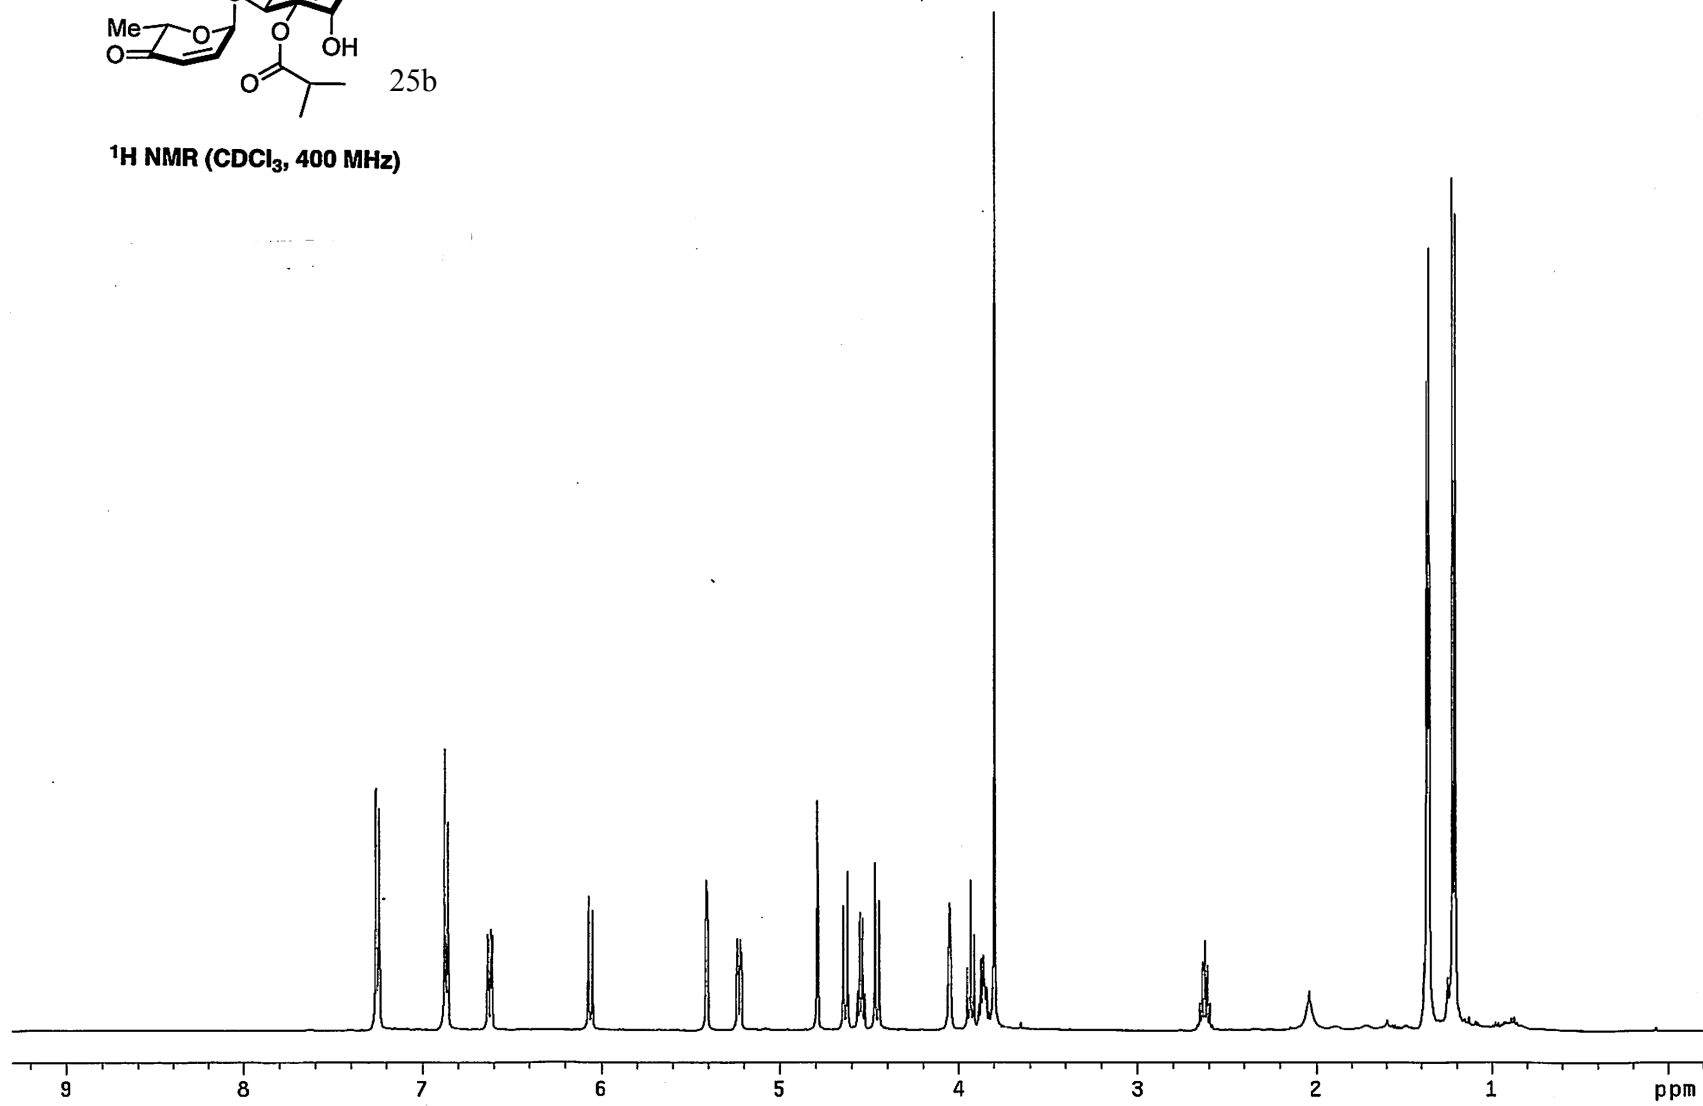



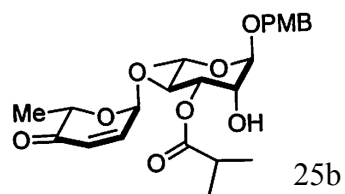

$^{13}\text{C}$  NMR ( $\text{CDCl}_3$ , 100 MHz)

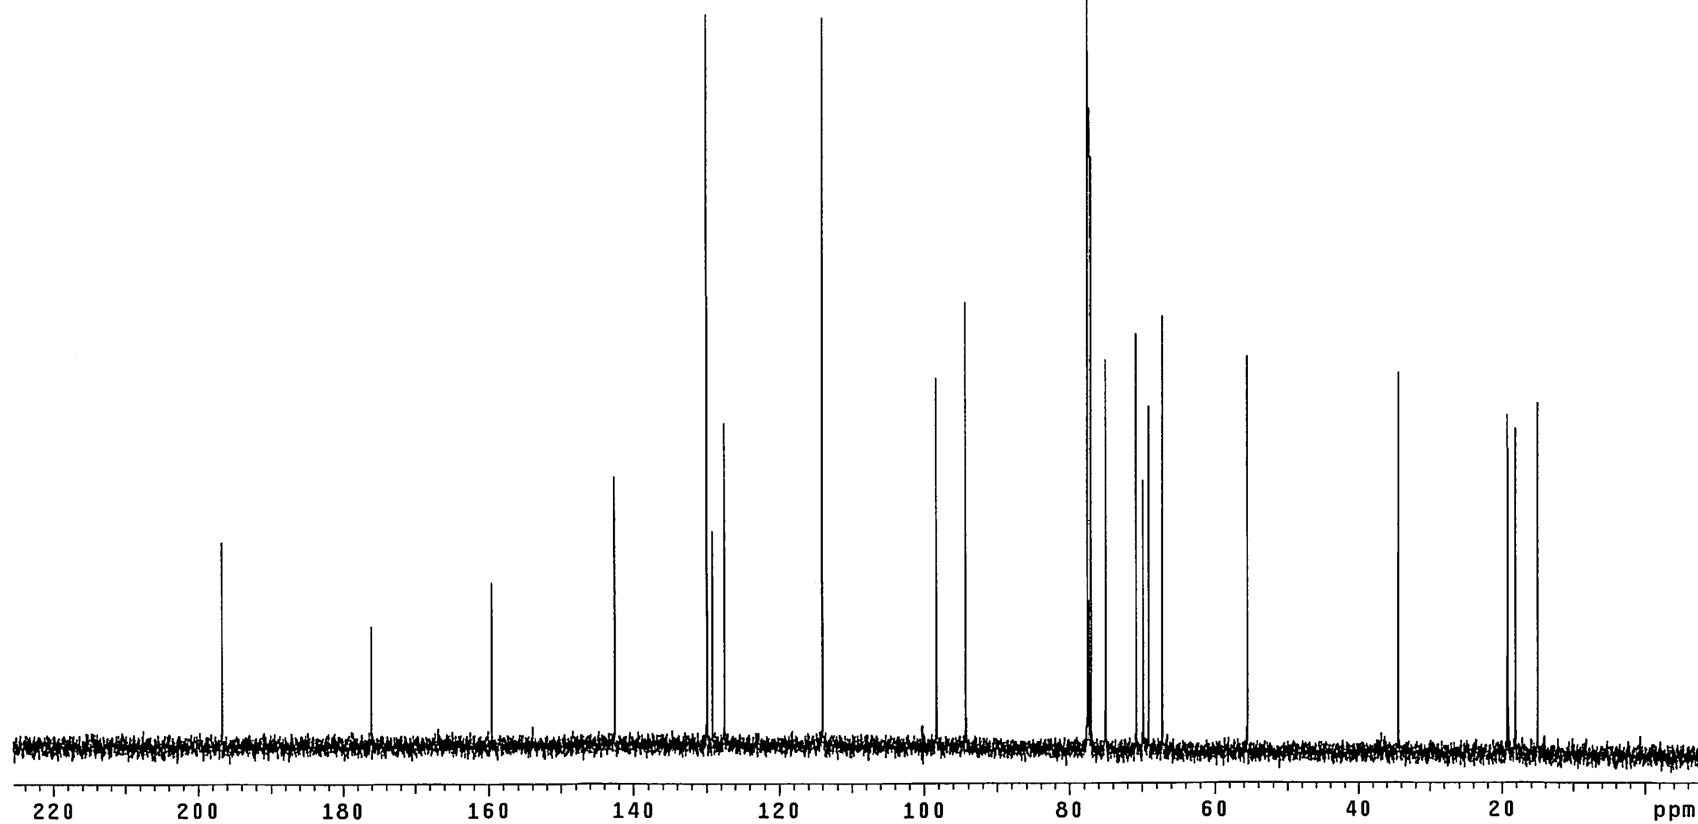

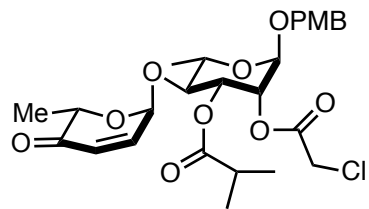

25b-i

$^1\text{H NMR}$  ( $\text{CDCl}_3$ , 400 MHz)

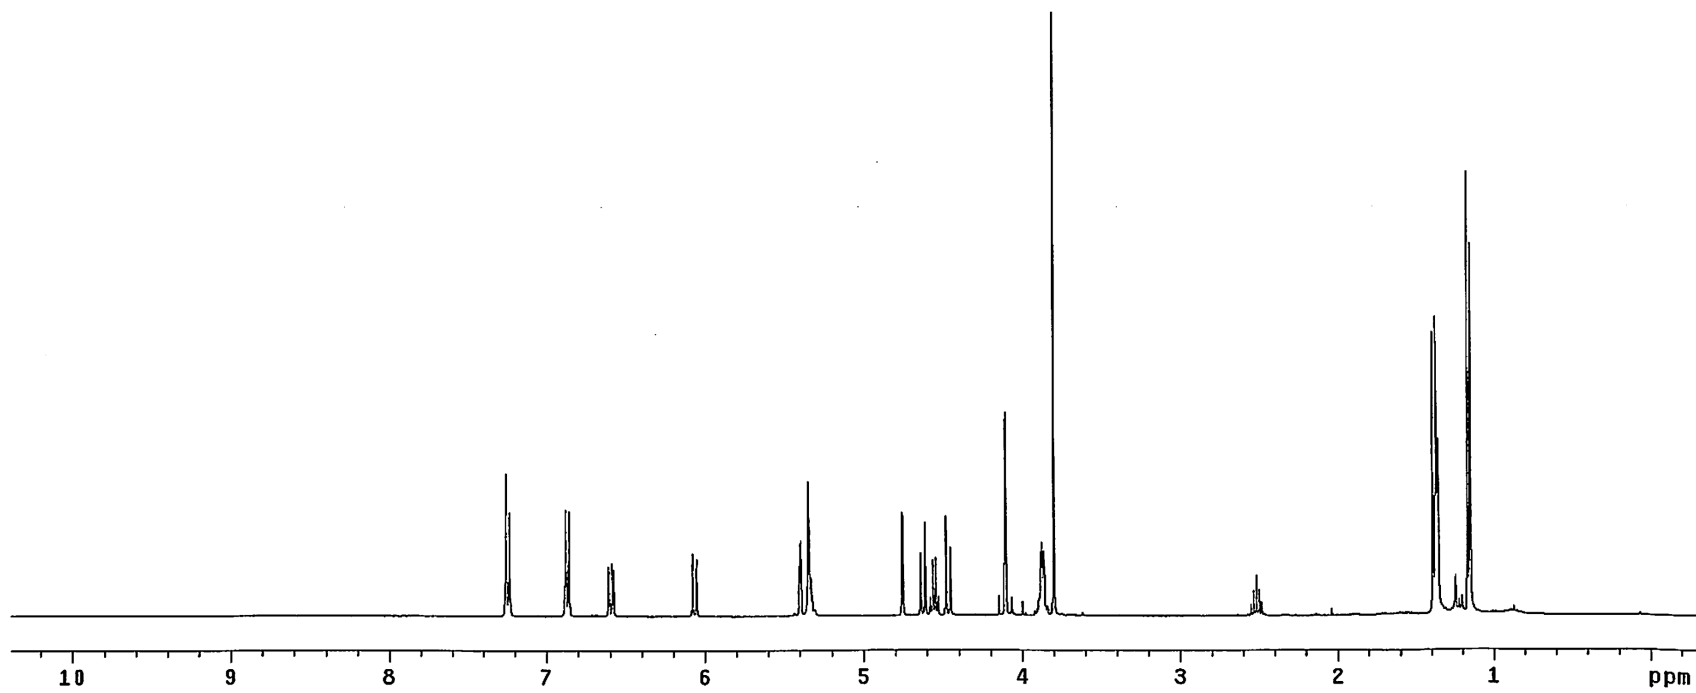

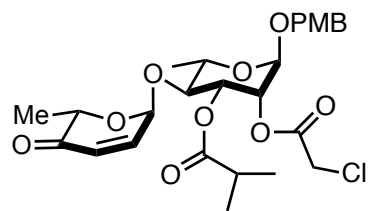

25b-i

$^{13}\text{C}$  NMR ( $\text{CDCl}_3$ , 100 MHz)

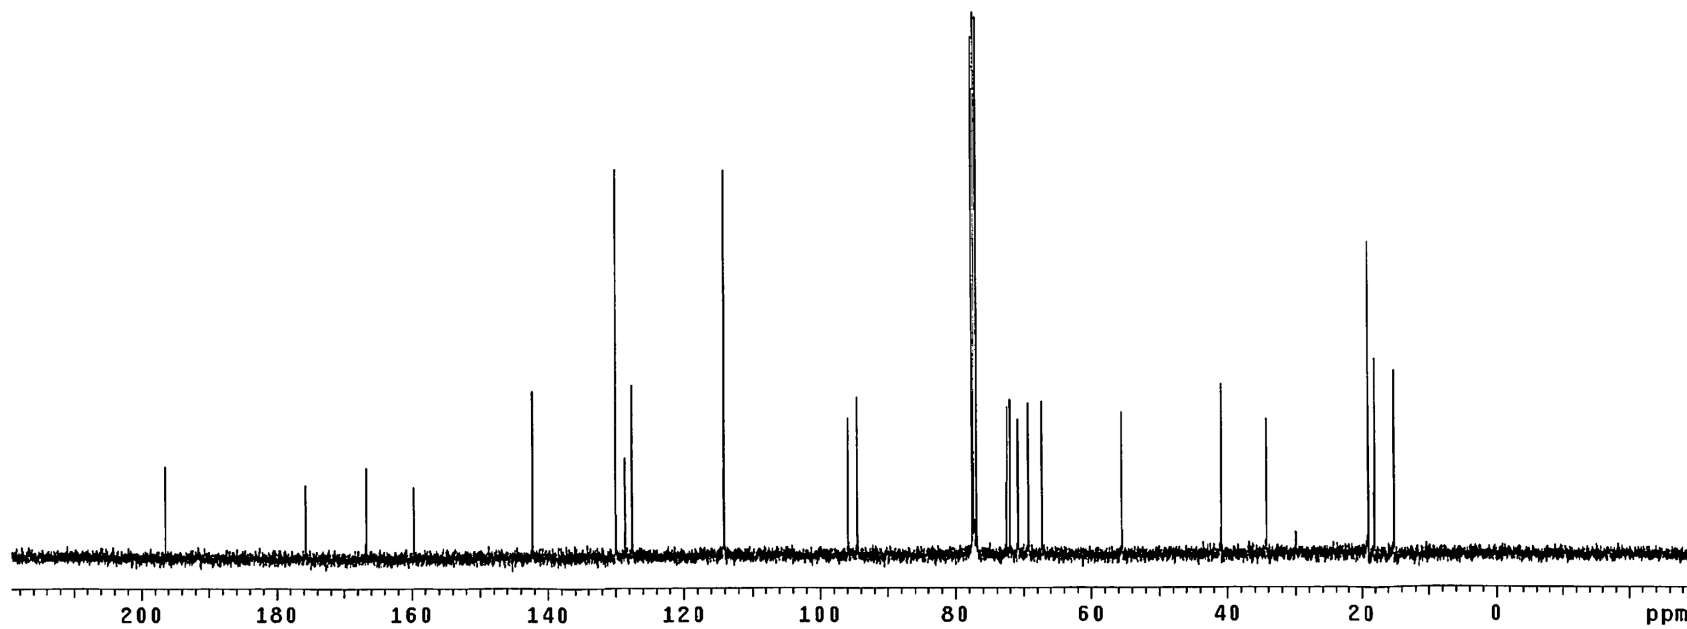

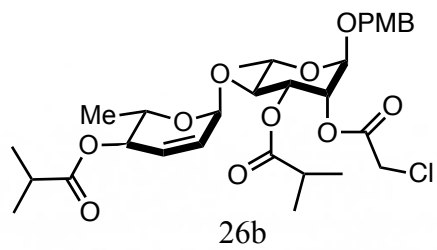

$^1\text{H NMR}$  ( $\text{CDCl}_3$ , 400 MHz)

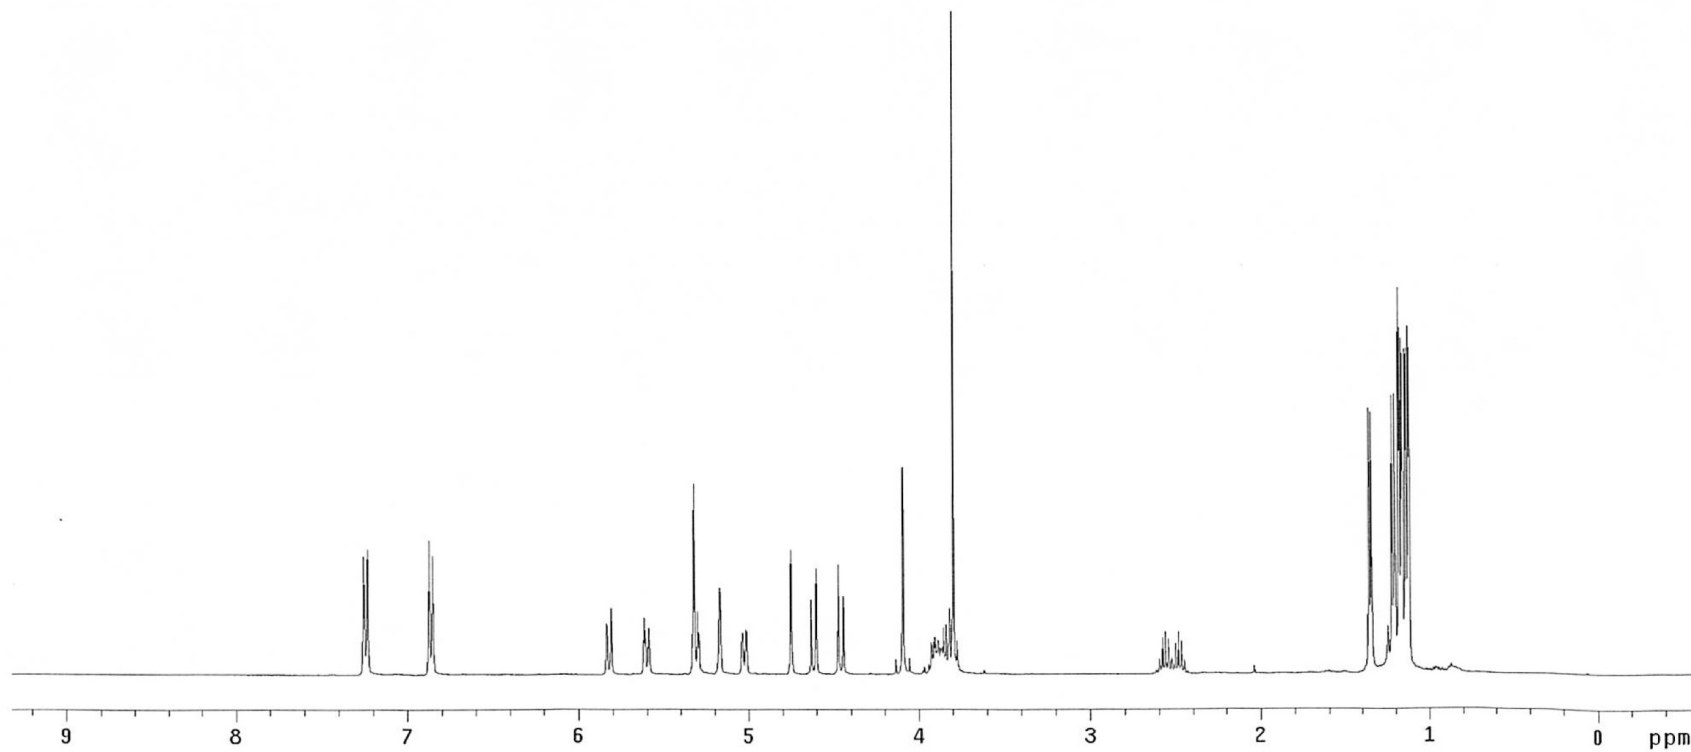

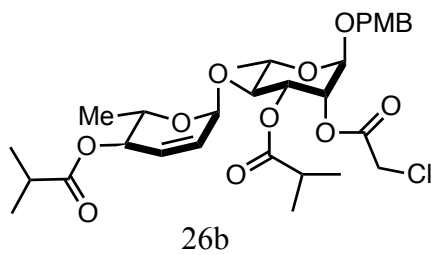

<sup>13</sup>C NMR (CDCl<sub>3</sub>, 100 MHz)

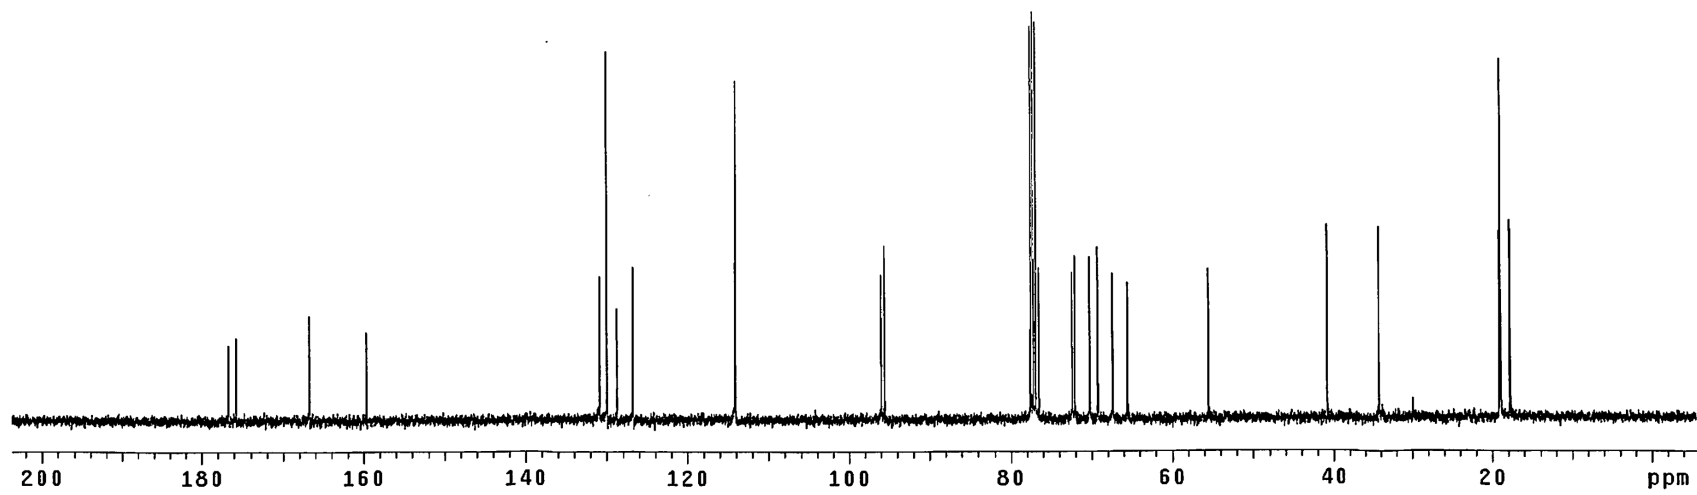

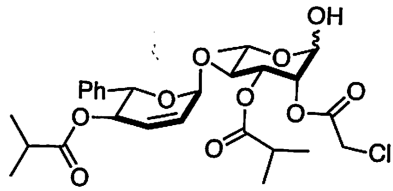

26b-i

<sup>1</sup>H NMR (CDCl<sub>3</sub>, 400 MHz)

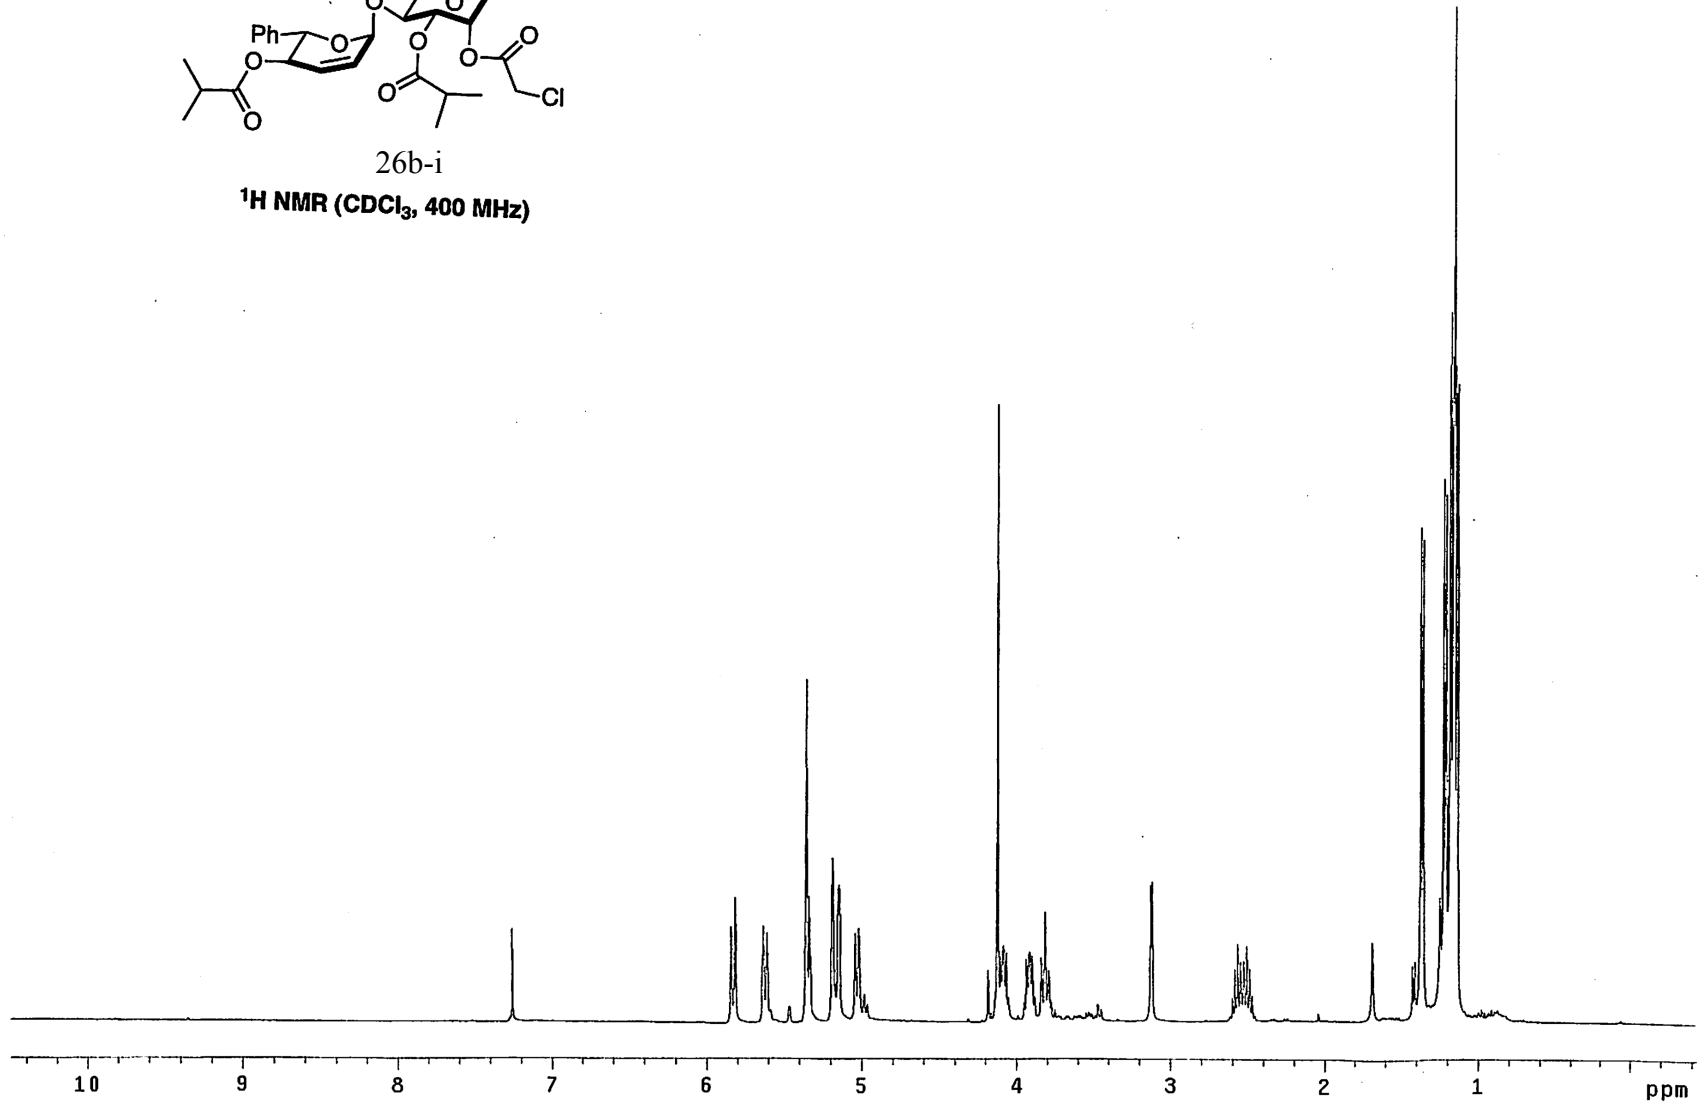

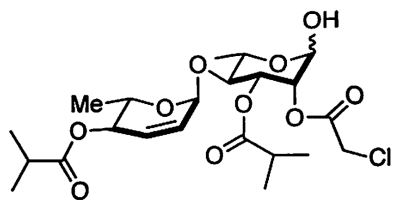

26b-i

$^{13}\text{C}$  NMR ( $\text{CDCl}_3$ , 100 MHz)

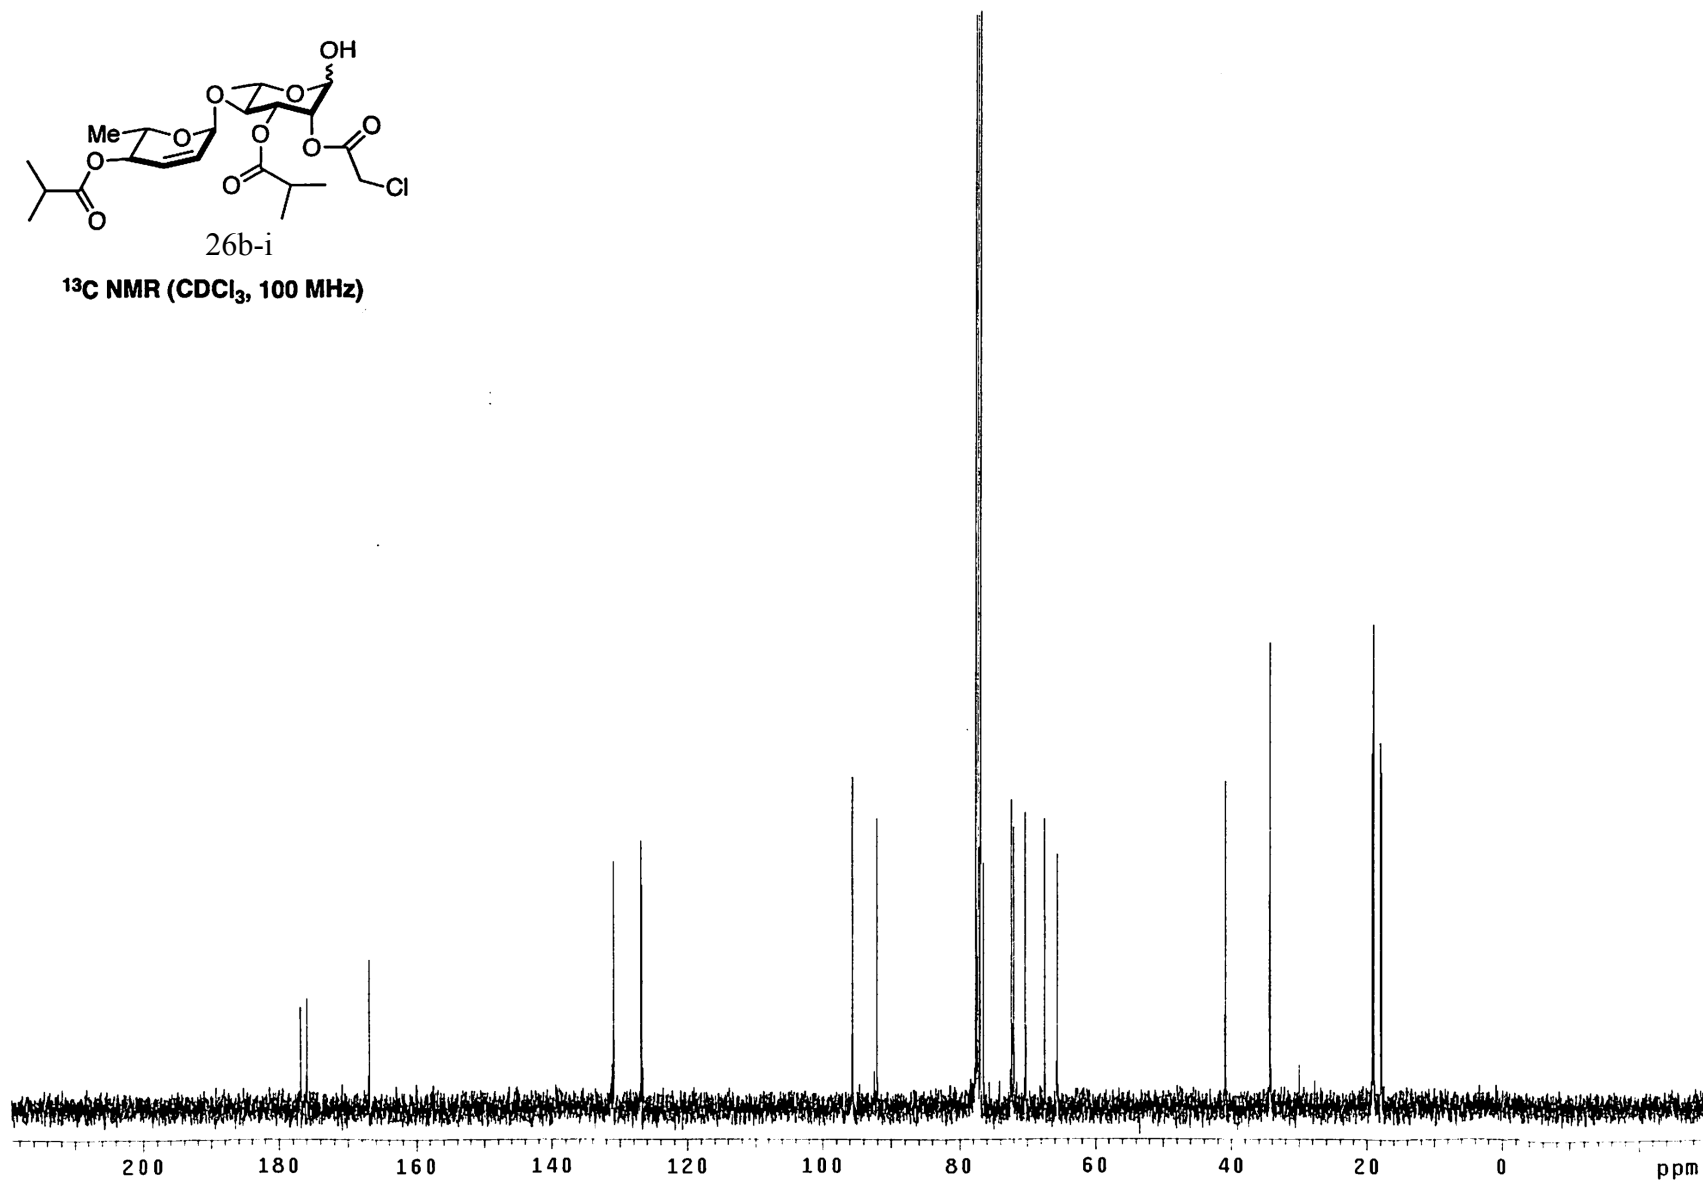

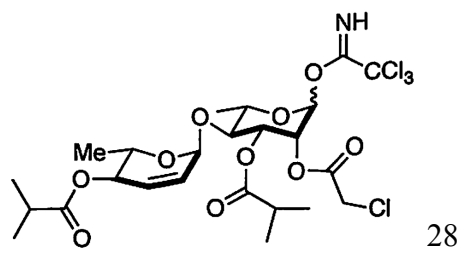

<sup>1</sup>H NMR (benzene-d<sub>6</sub>, 400 MHz)

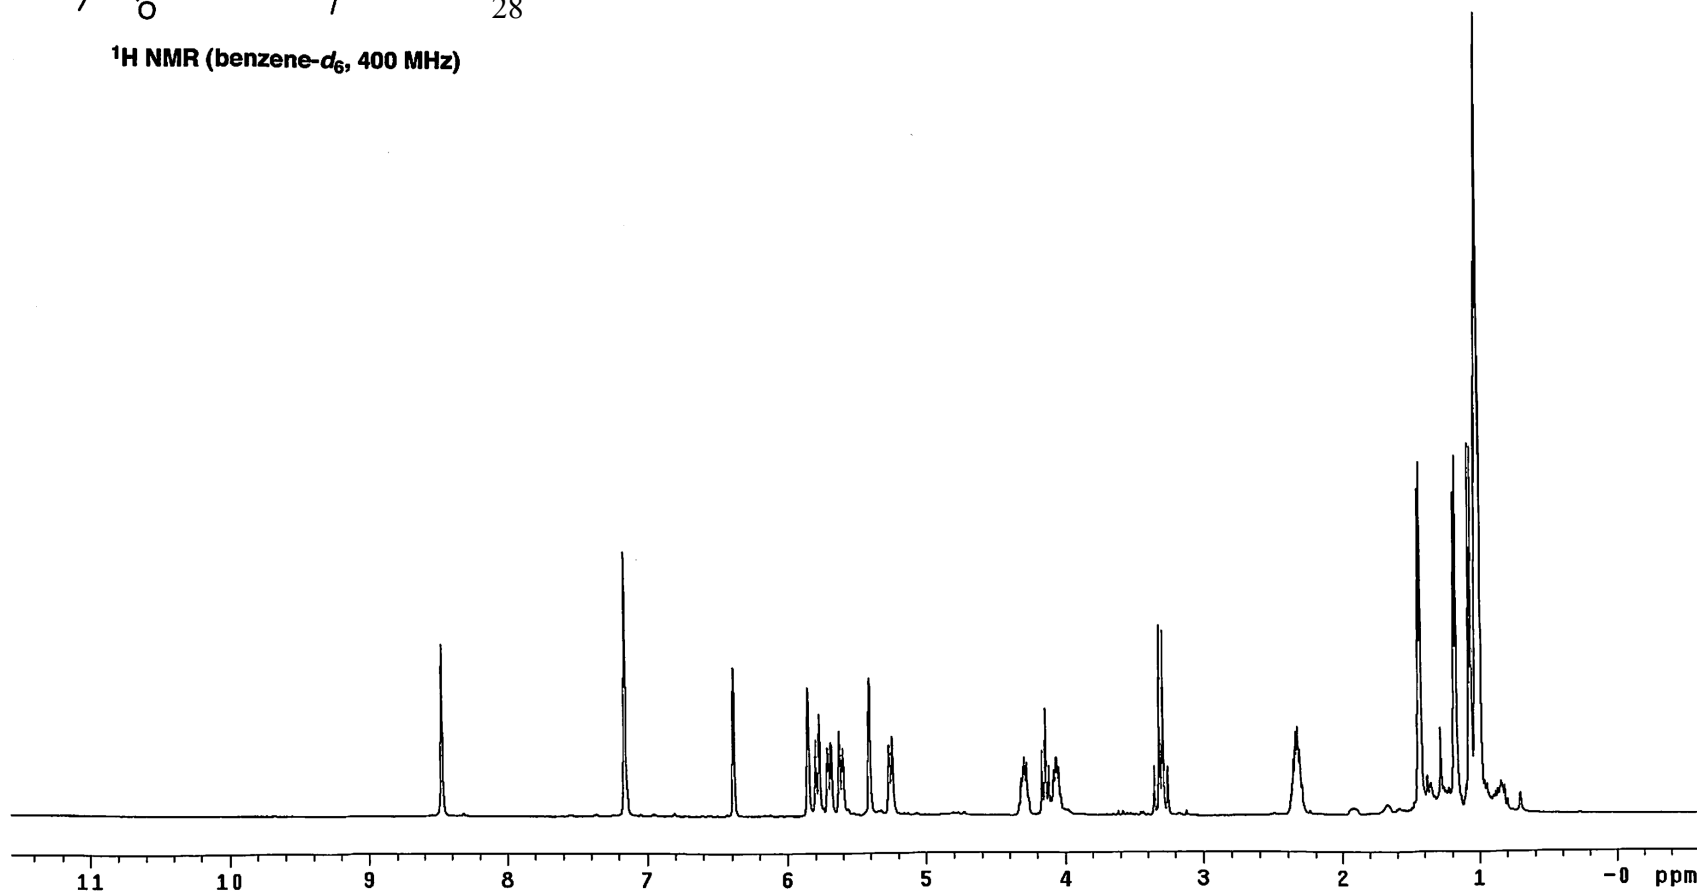



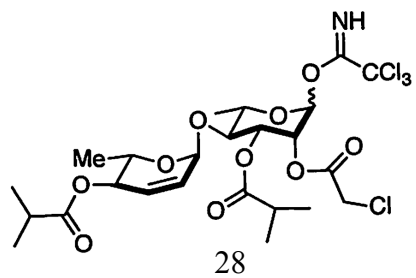

<sup>13</sup>C NMR (benzene-d<sub>6</sub>, 100 MHz)

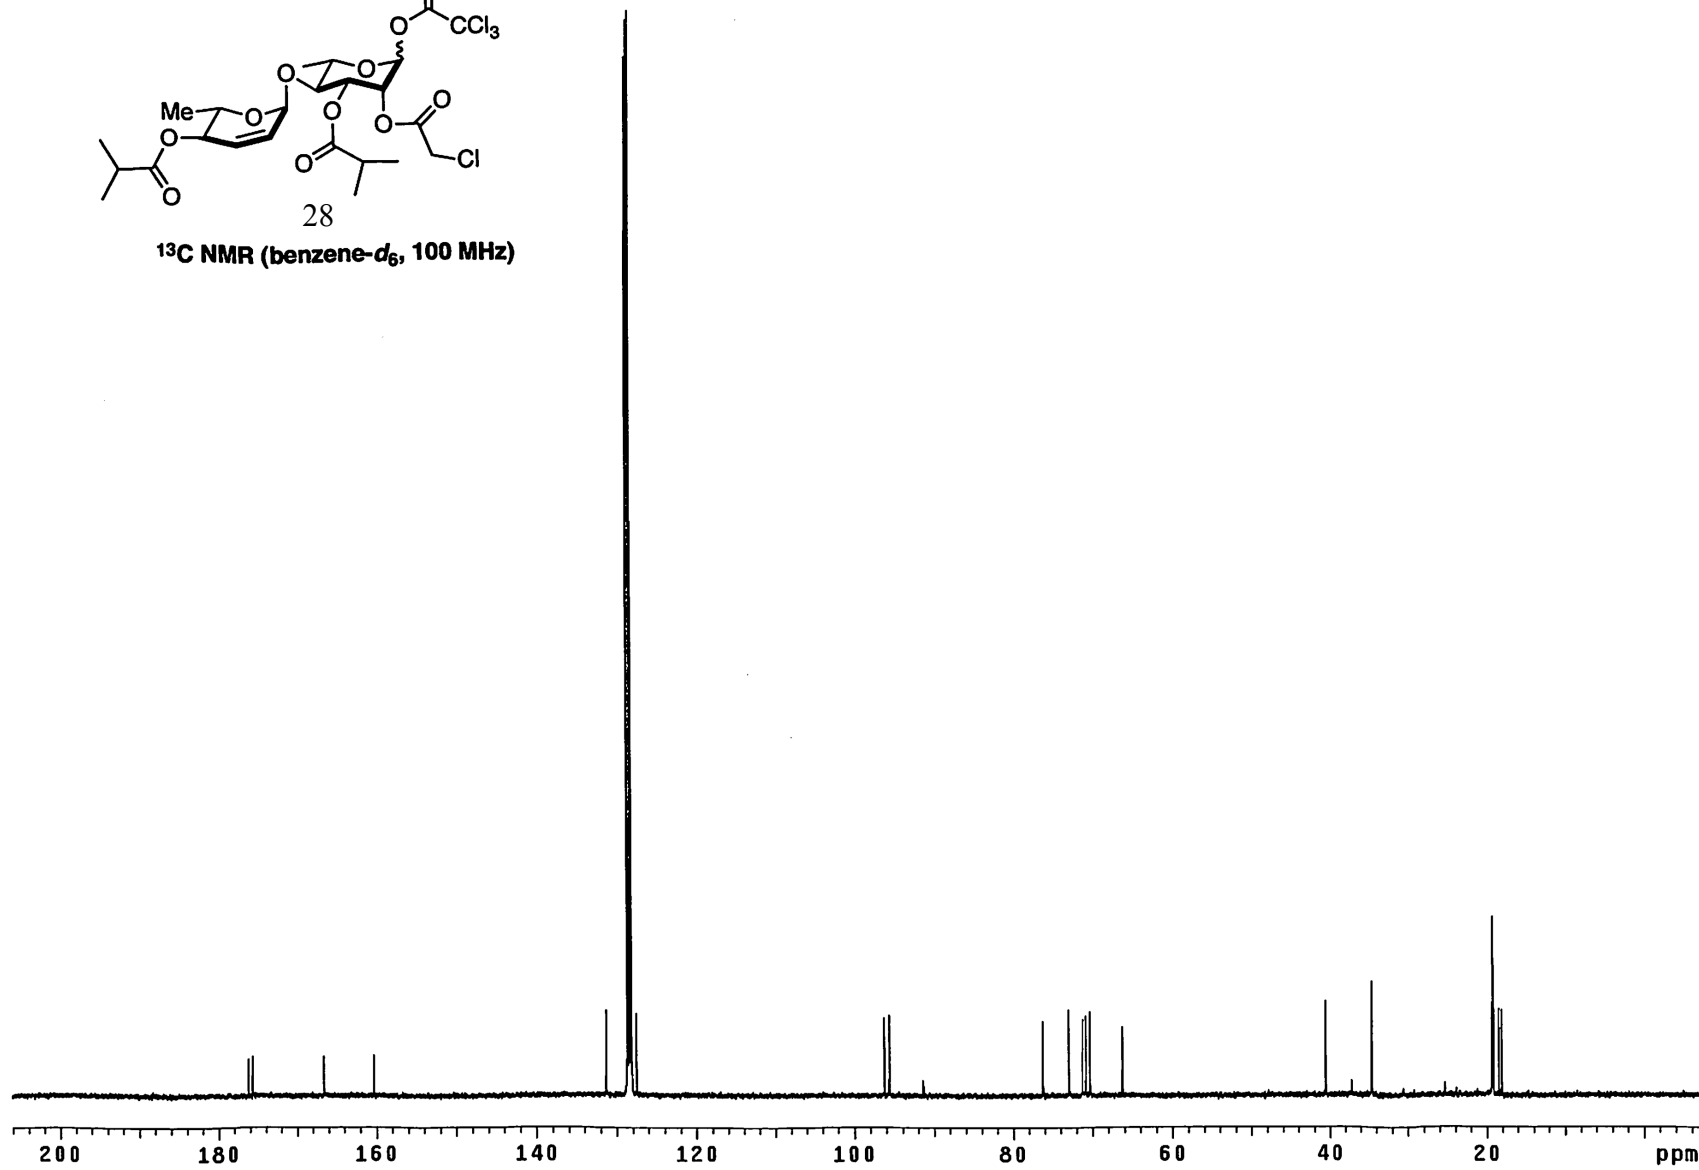

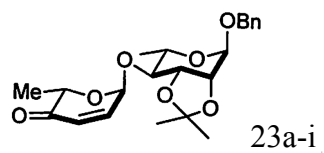

<sup>1</sup>H NMR (CDCl<sub>3</sub>, 400 MHz)

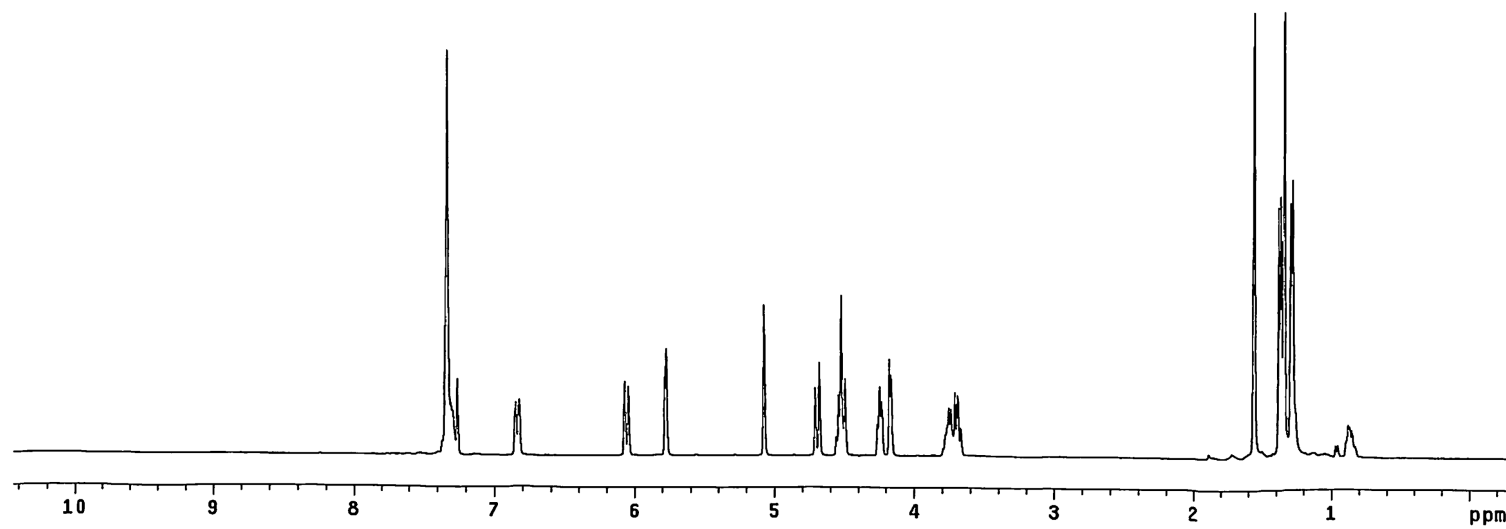

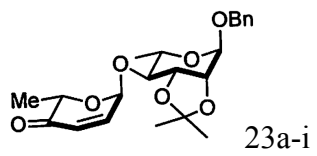

<sup>13</sup>C NMR (CDCl<sub>3</sub>, 100 MHz)

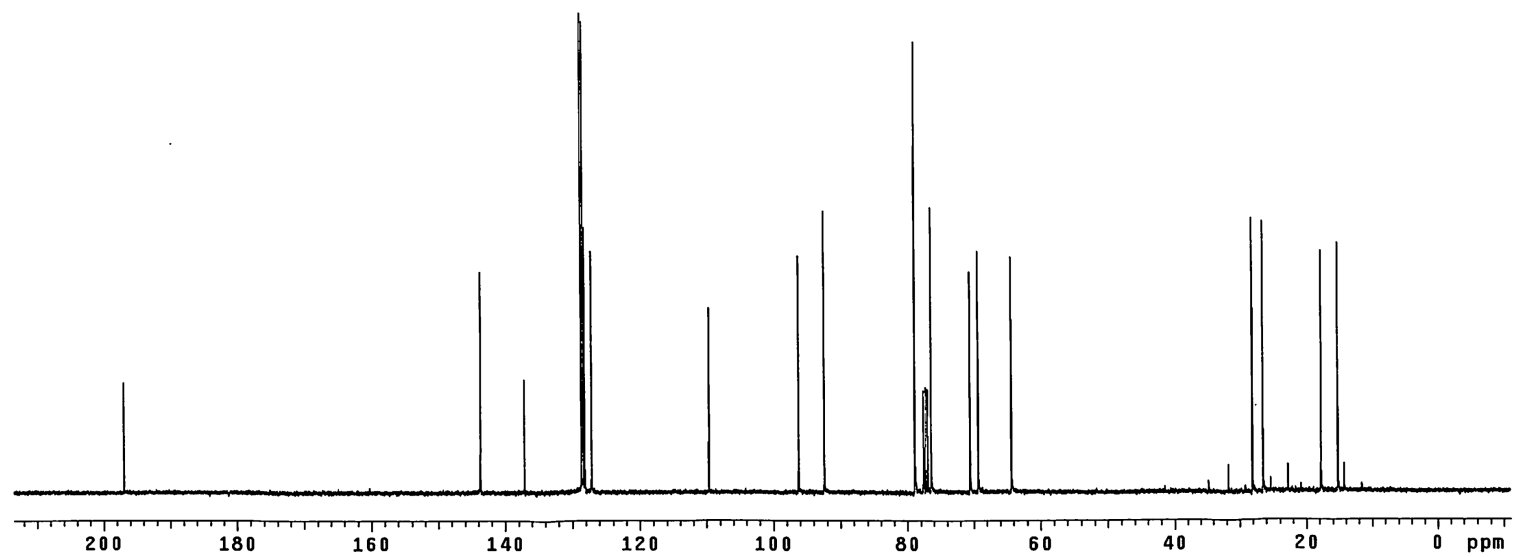

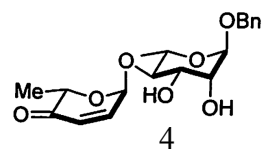

<sup>1</sup>H NMR (CDCl<sub>3</sub>, 400 MHz)

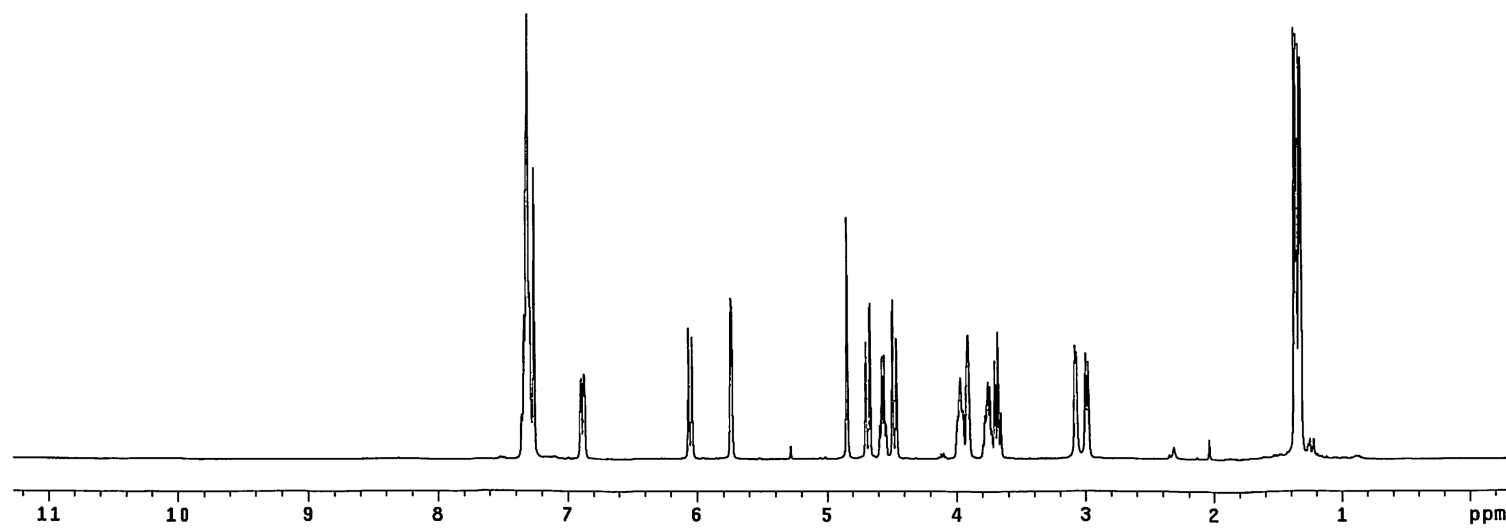

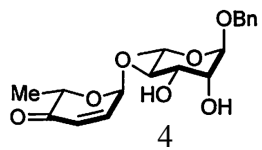

<sup>13</sup>C NMR (CDCl<sub>3</sub>, 100 MHz)

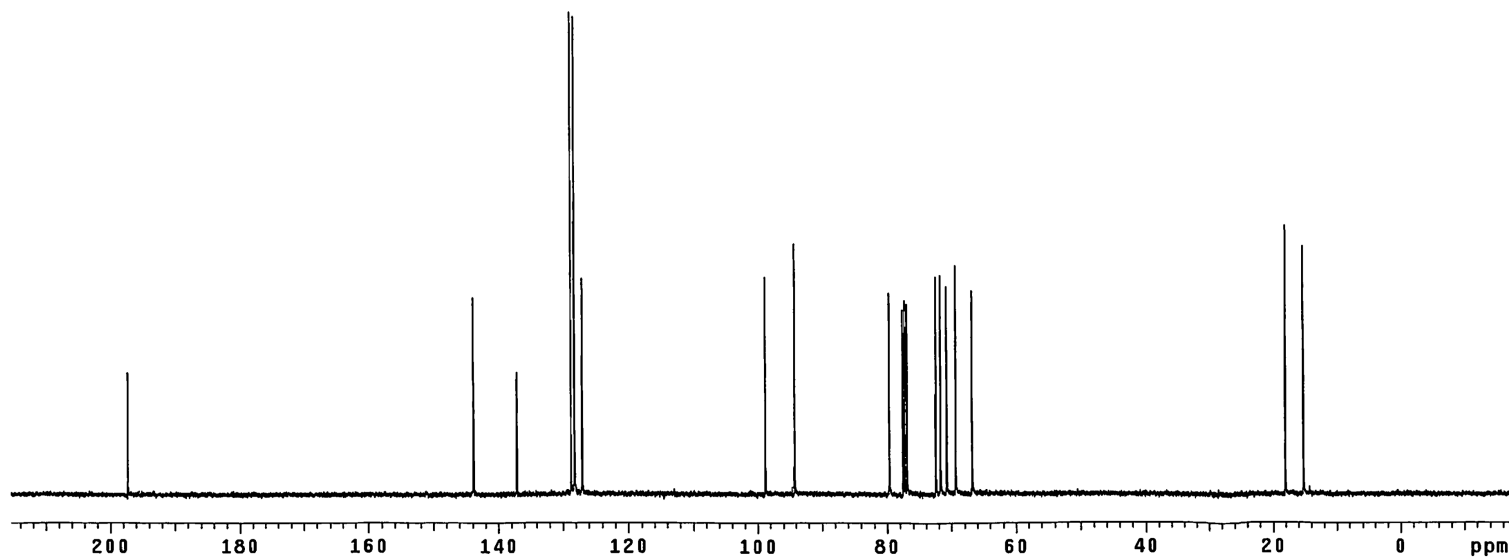

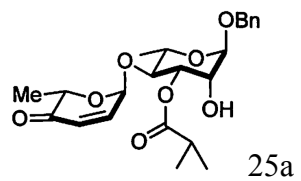

<sup>1</sup>H NMR (CDCl<sub>3</sub>, 400 MHz)

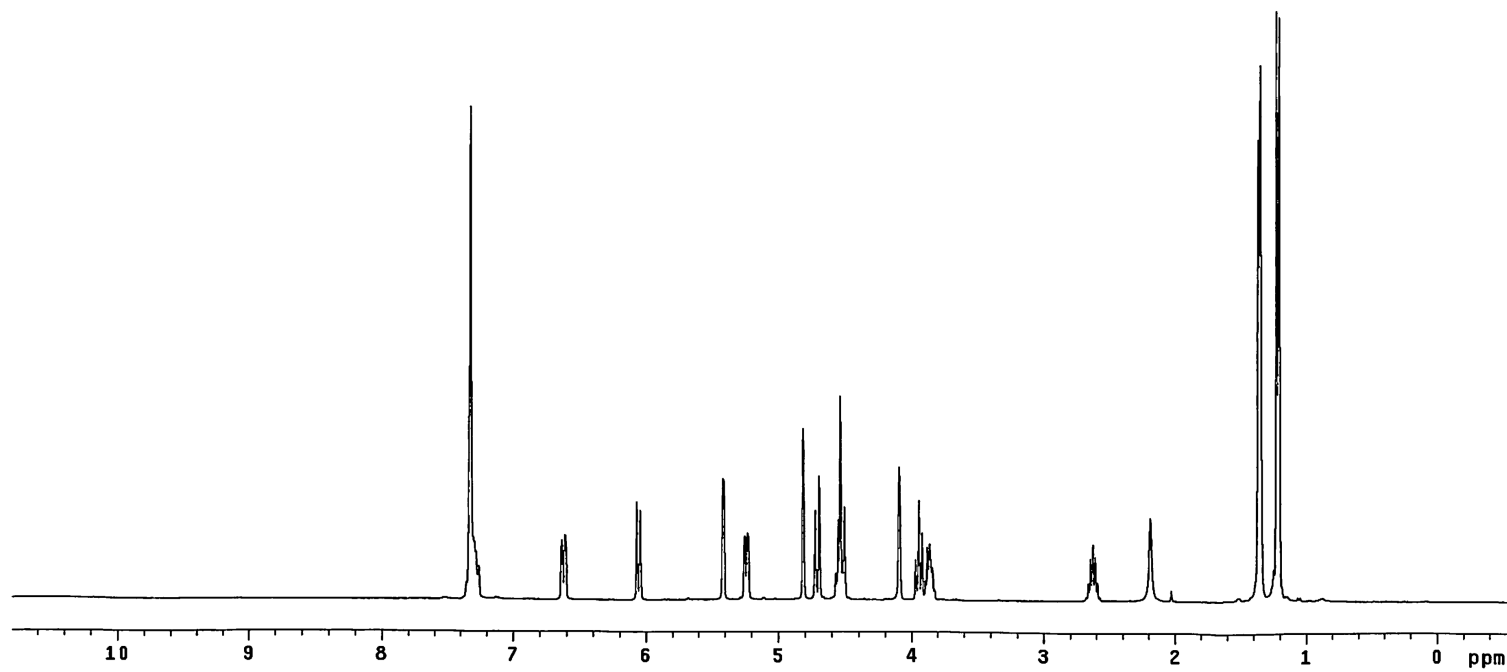

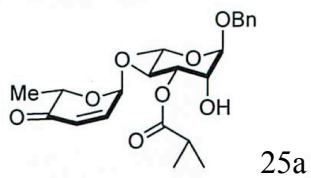

$^{13}\text{C}$  NMR ( $\text{CDCl}_3$ , 100 MHz)

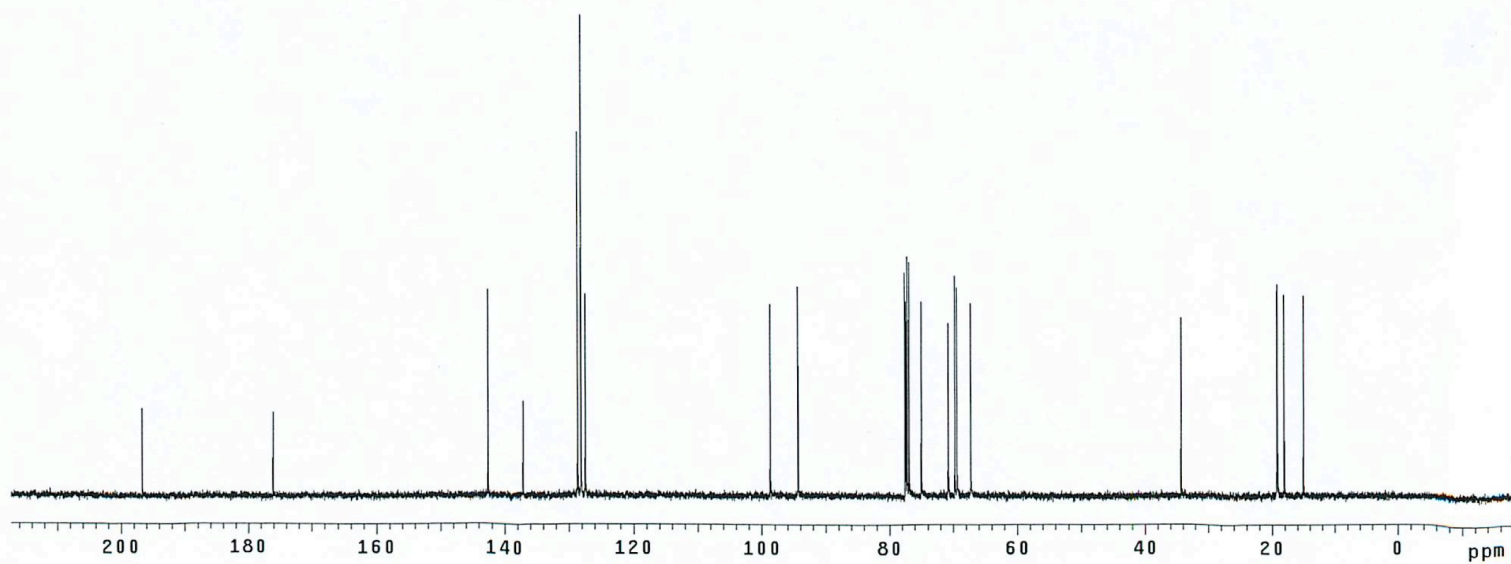

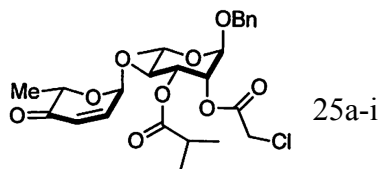

<sup>1</sup>H NMR (CDCl<sub>3</sub>, 400 MHz)

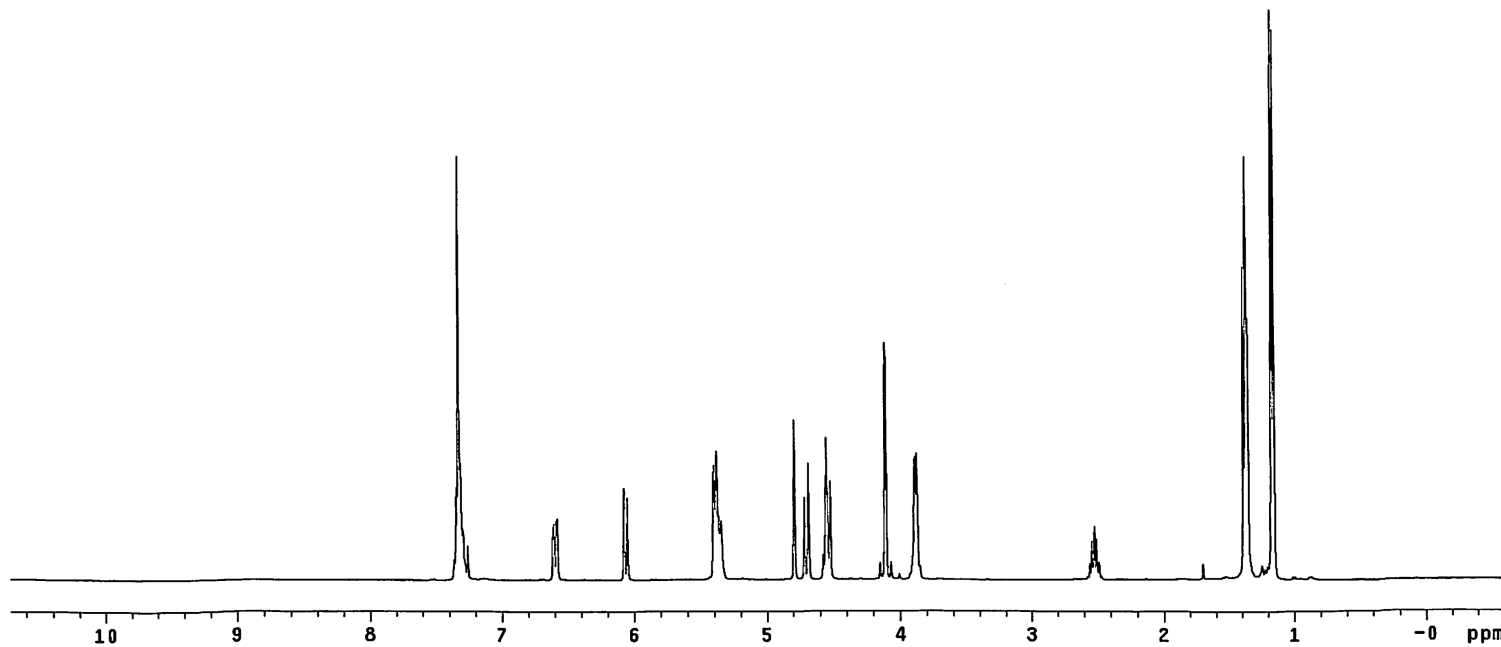



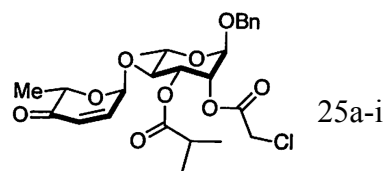

<sup>13</sup>C NMR (CDCl<sub>3</sub>, 100 MHz)

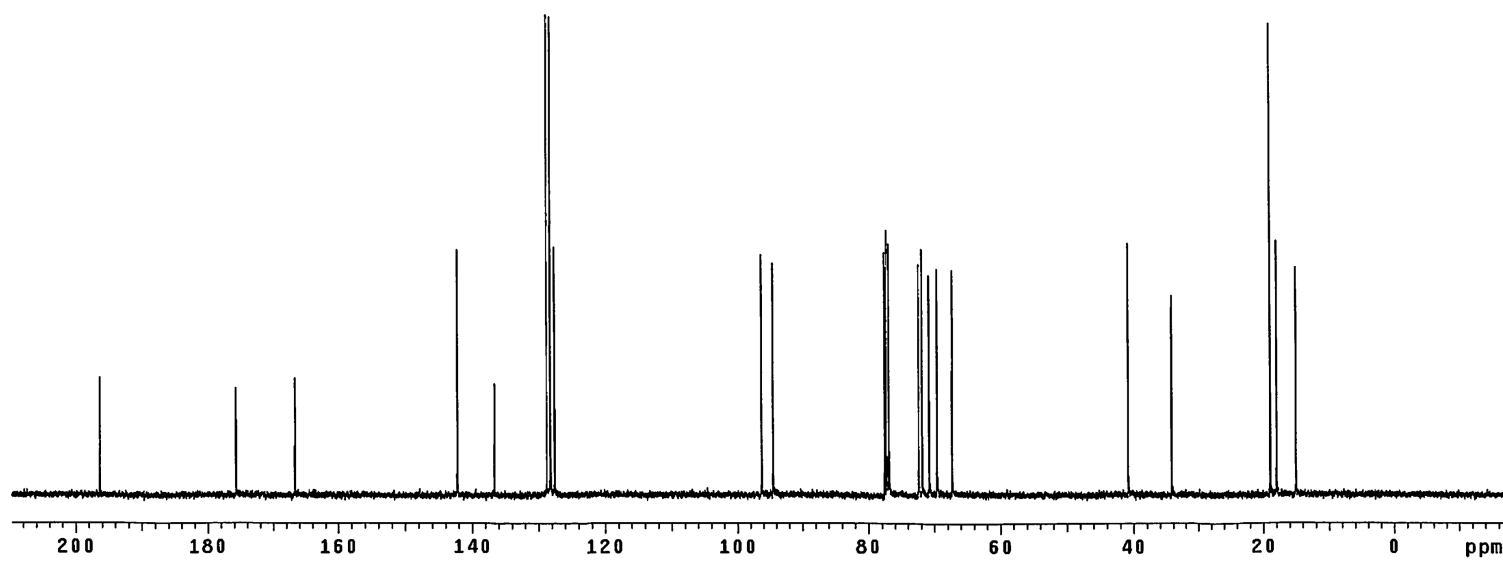

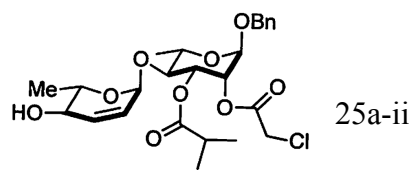

<sup>1</sup>H NMR (CDCl<sub>3</sub>, 400 MHz)

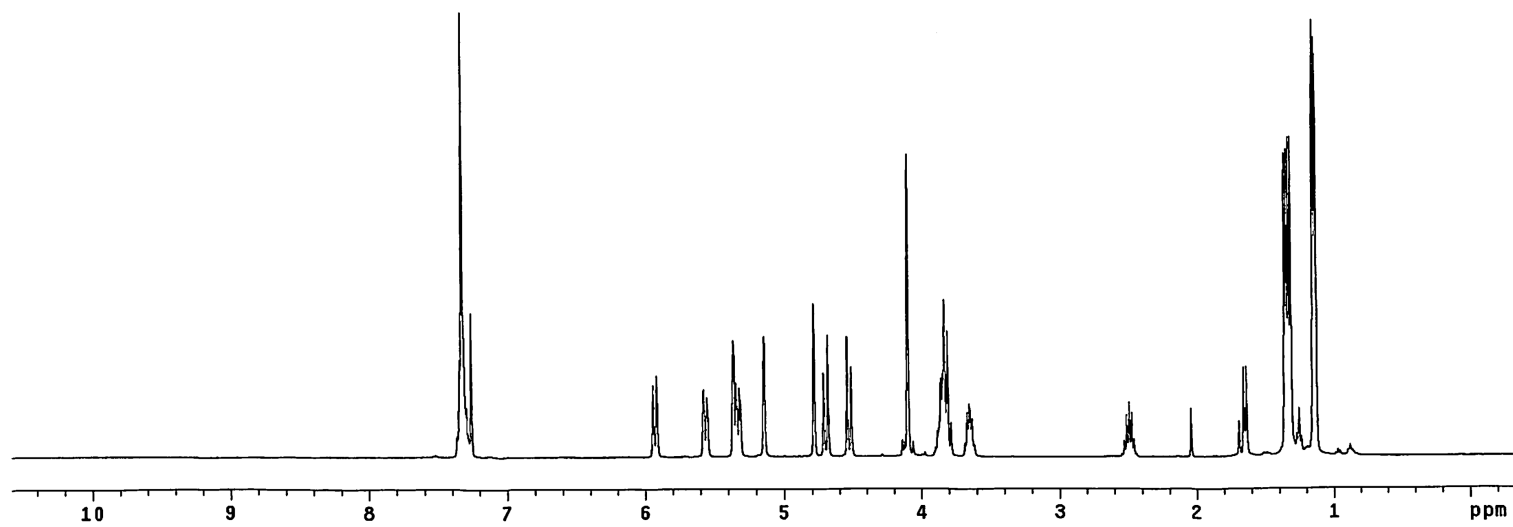

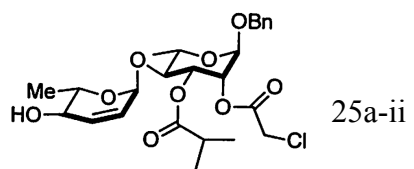

<sup>13</sup>C NMR (CDCl<sub>3</sub>, 100 MHz)

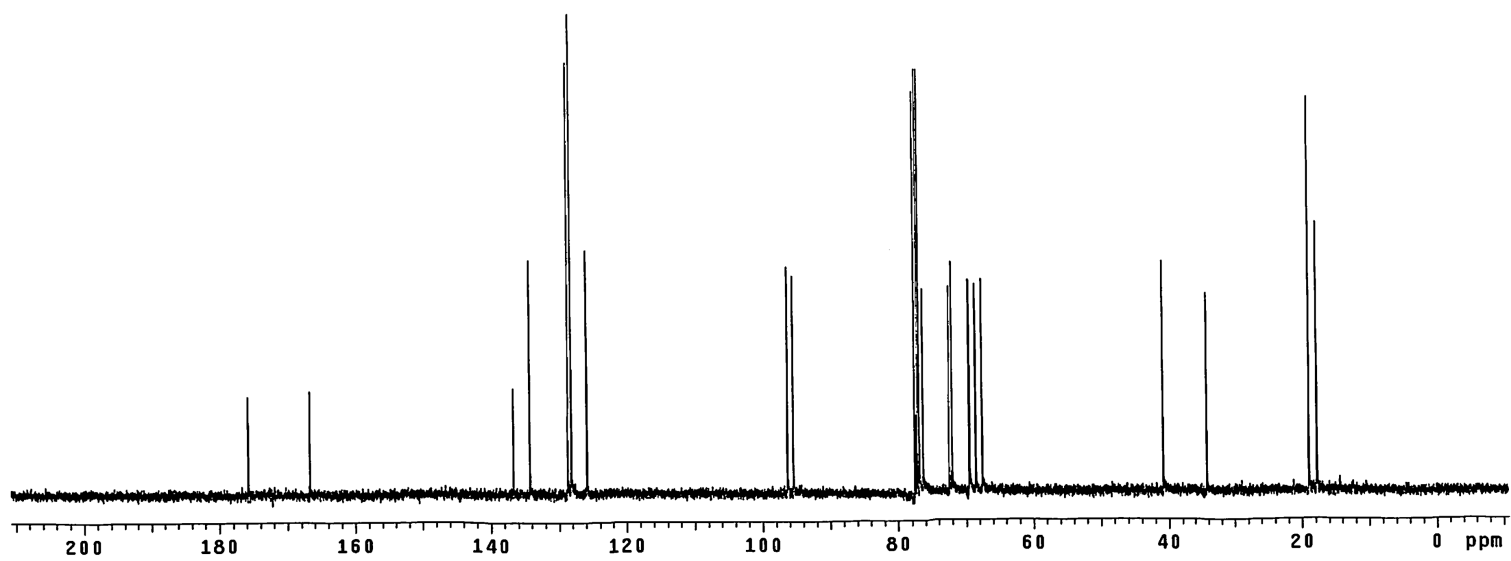

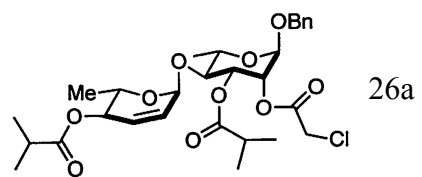

<sup>1</sup>H NMR (CDCl<sub>3</sub>, 400 MHz)

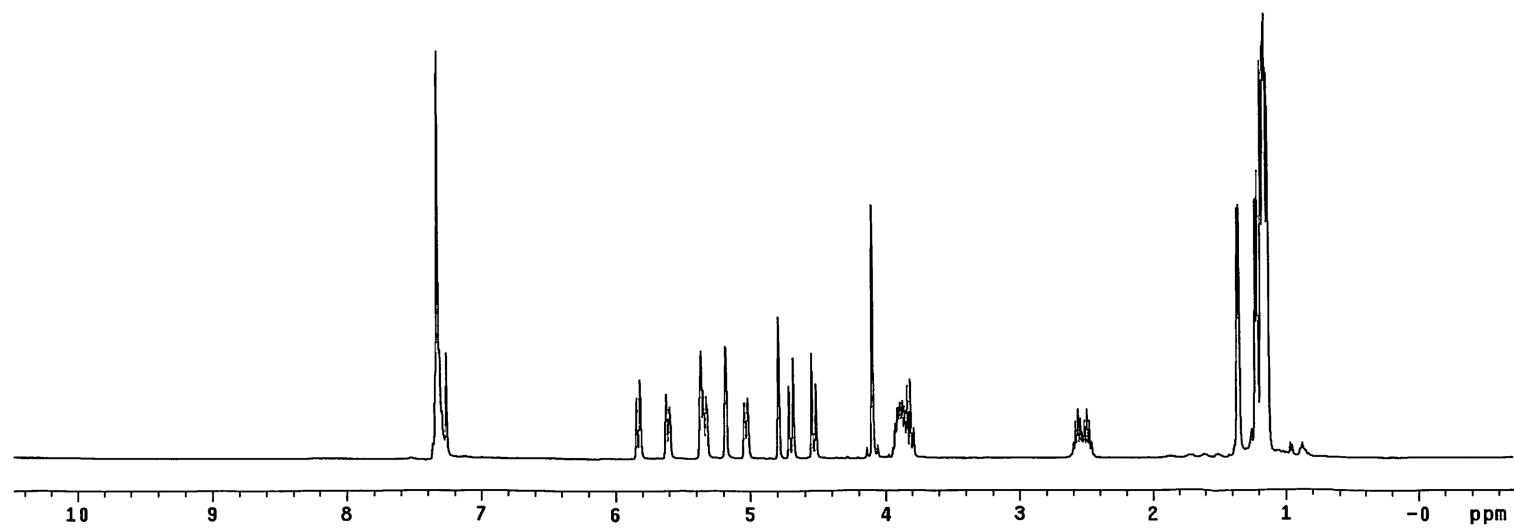

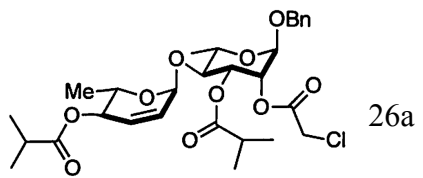

<sup>13</sup>C NMR (CDCl<sub>3</sub>, 100 MHz)

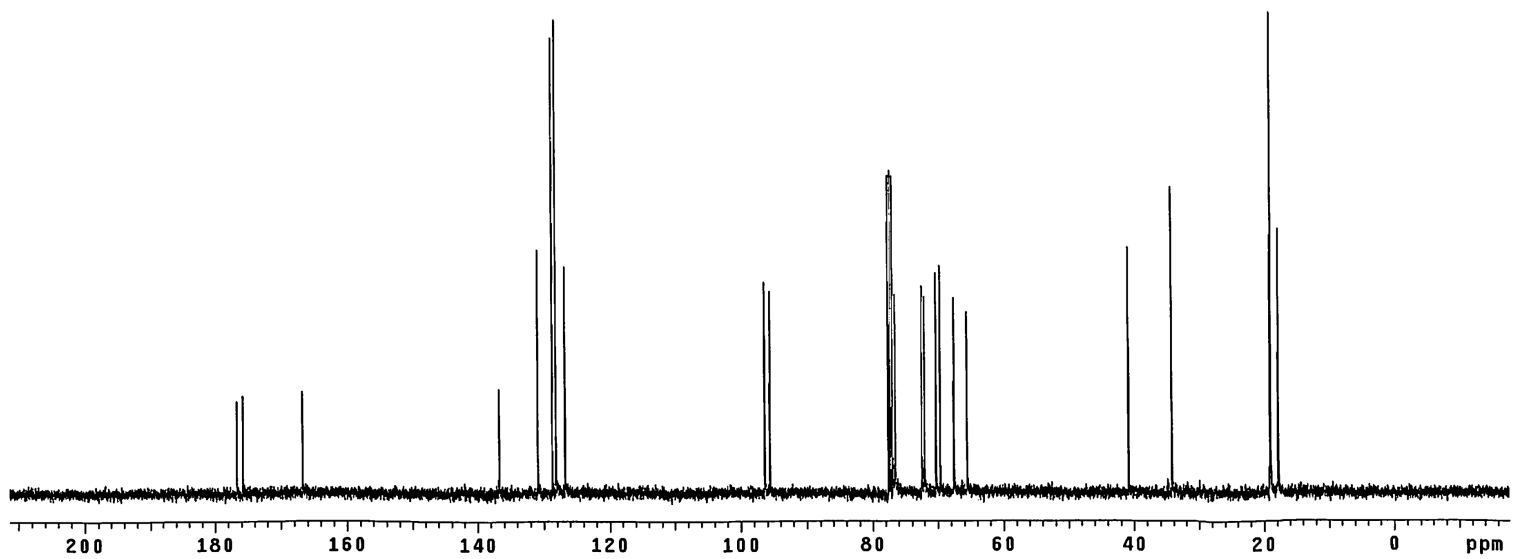

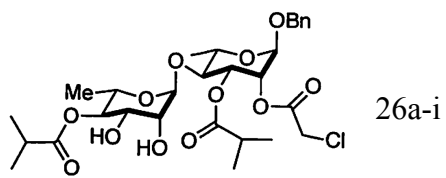

<sup>1</sup>H NMR (CDCl<sub>3</sub>, 400 MHz)

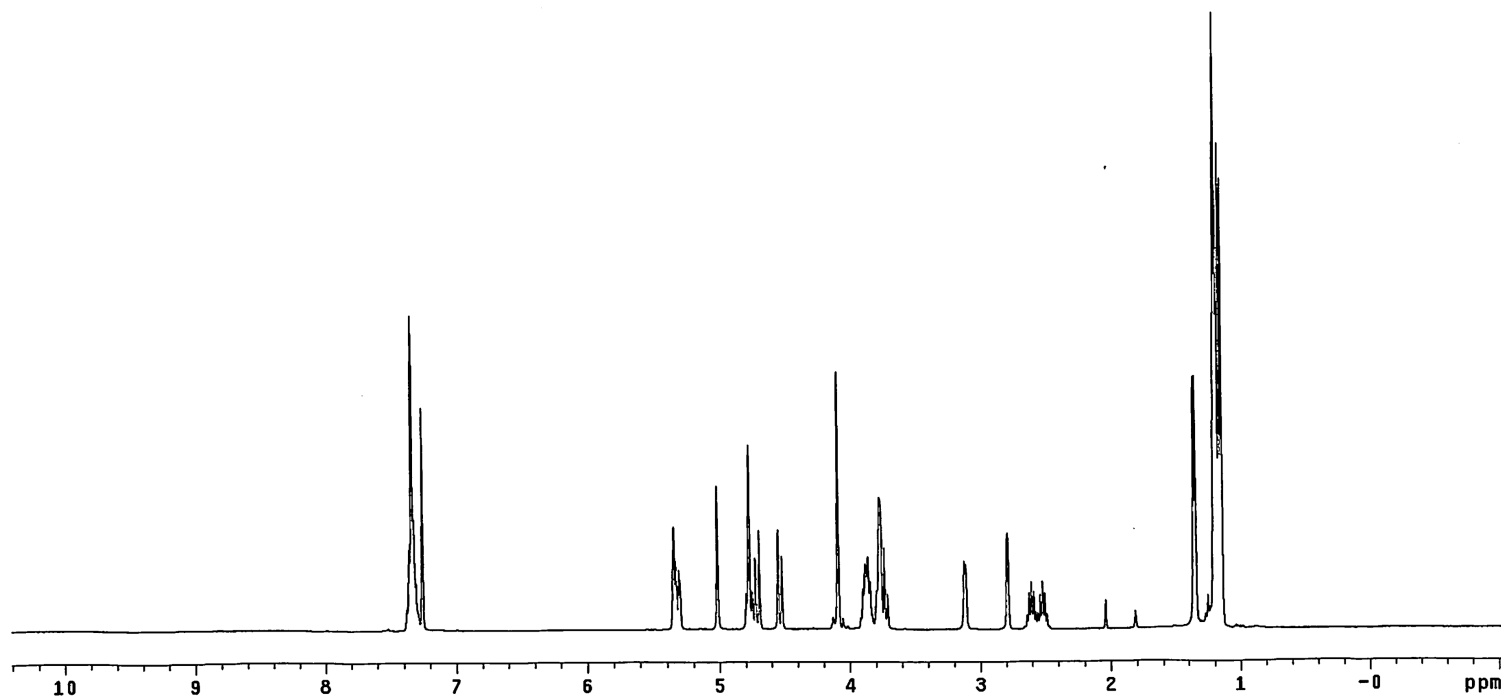

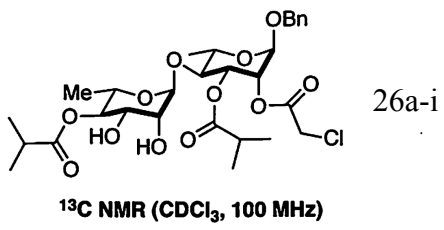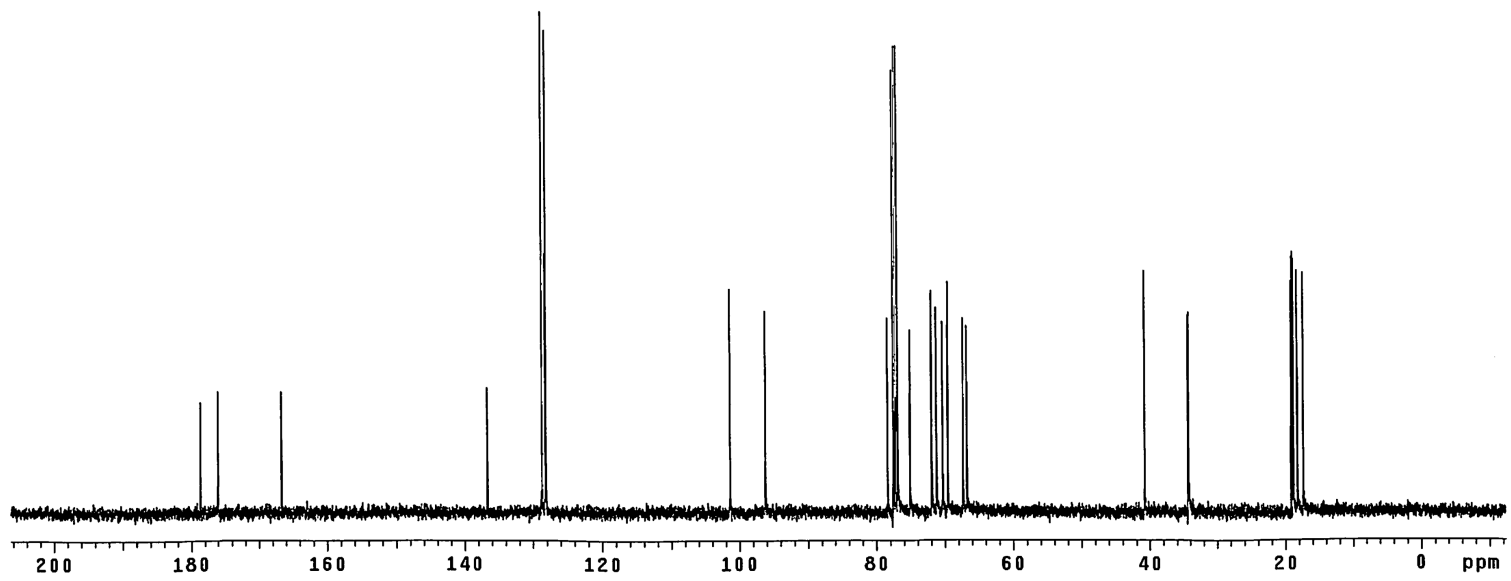

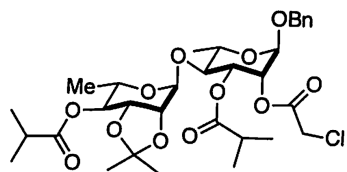

27

<sup>1</sup>H NMR (CDCl<sub>3</sub>, 500 MHz)

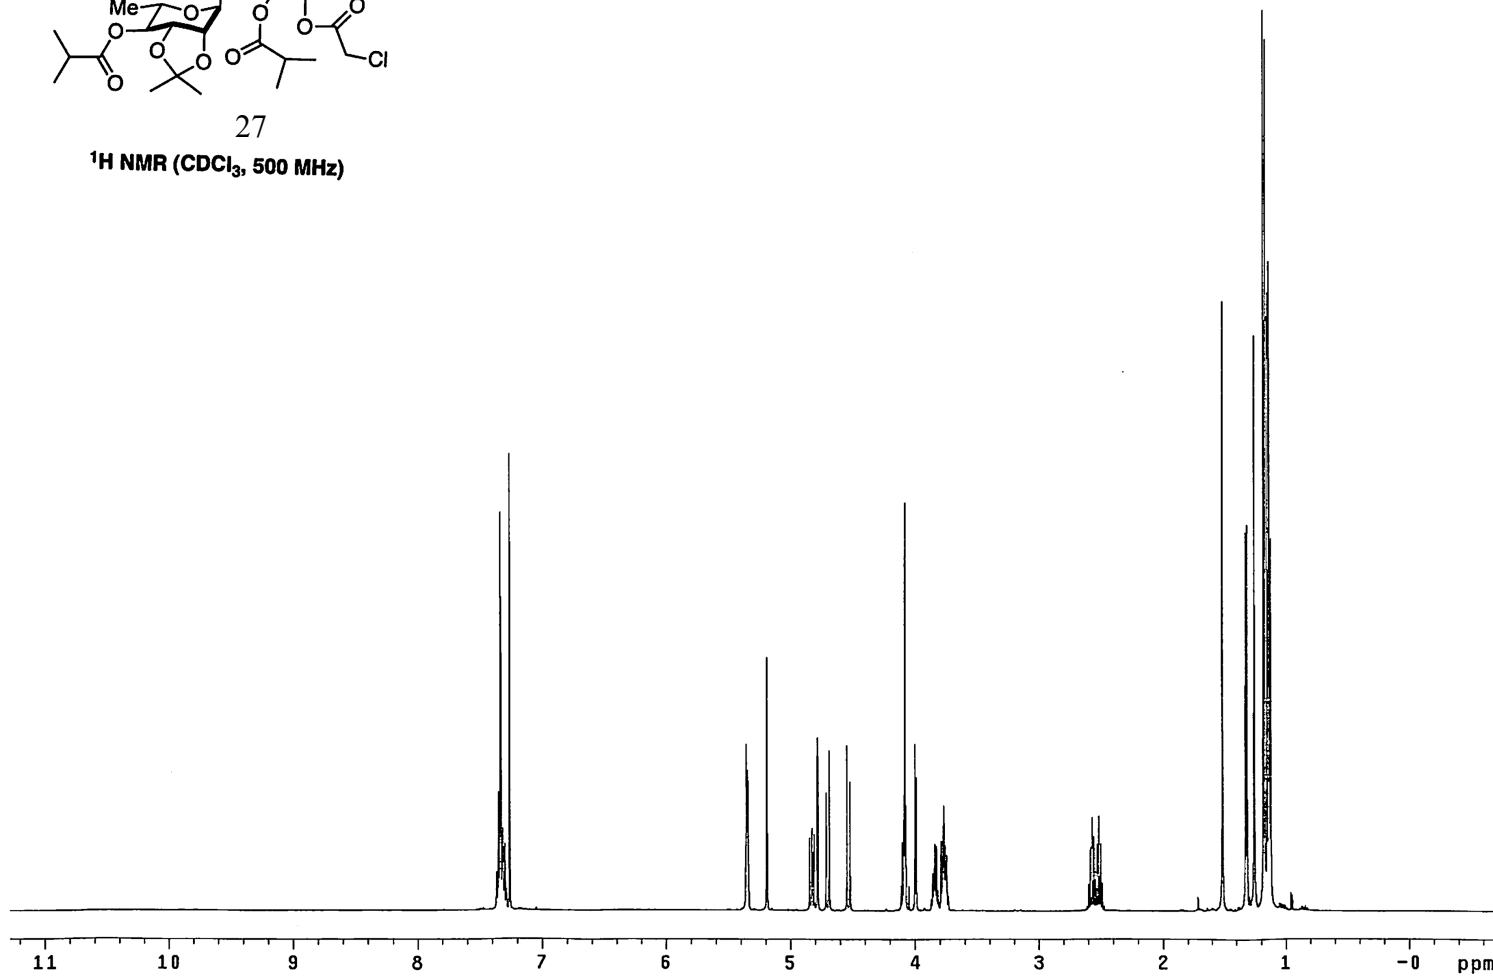



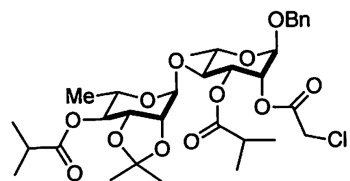

27

$^{13}\text{C}$  NMR ( $\text{CDCl}_3$ , 100 MHz)

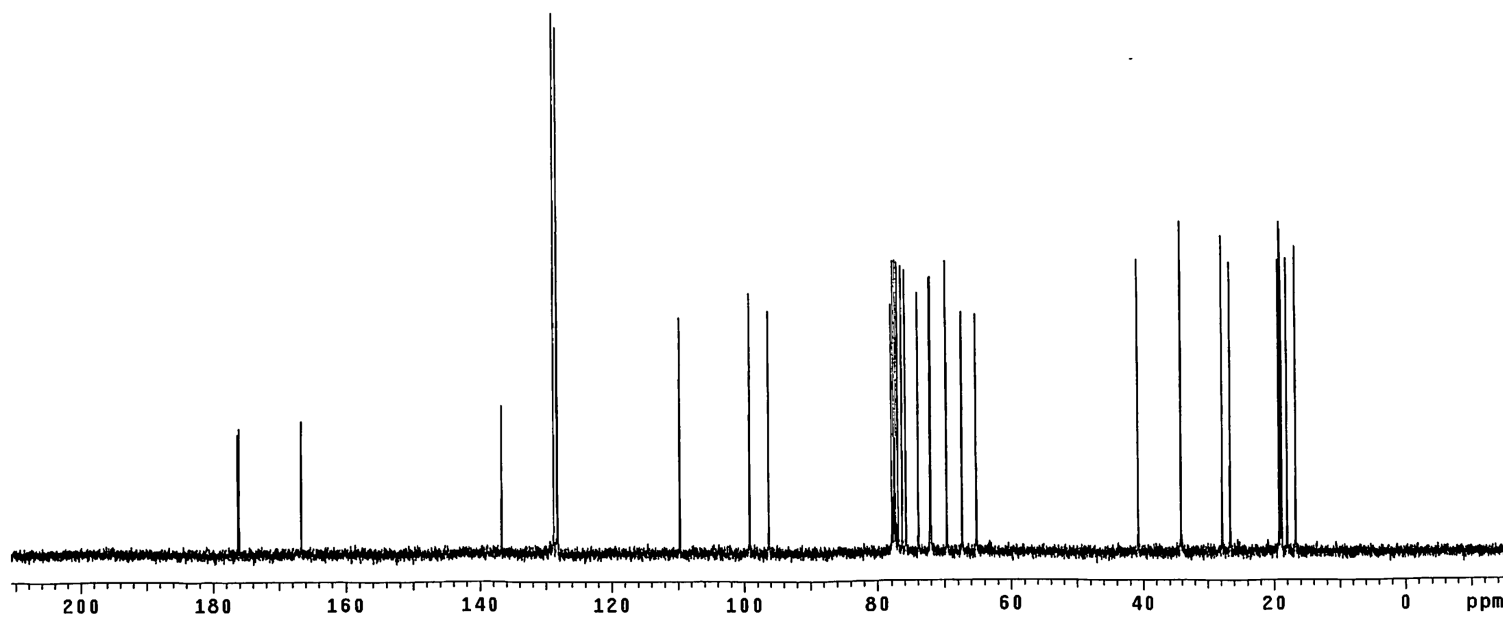

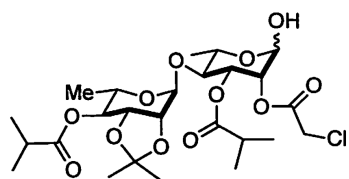

27a

<sup>1</sup>H NMR (CDCl<sub>3</sub>, 400 MHz)

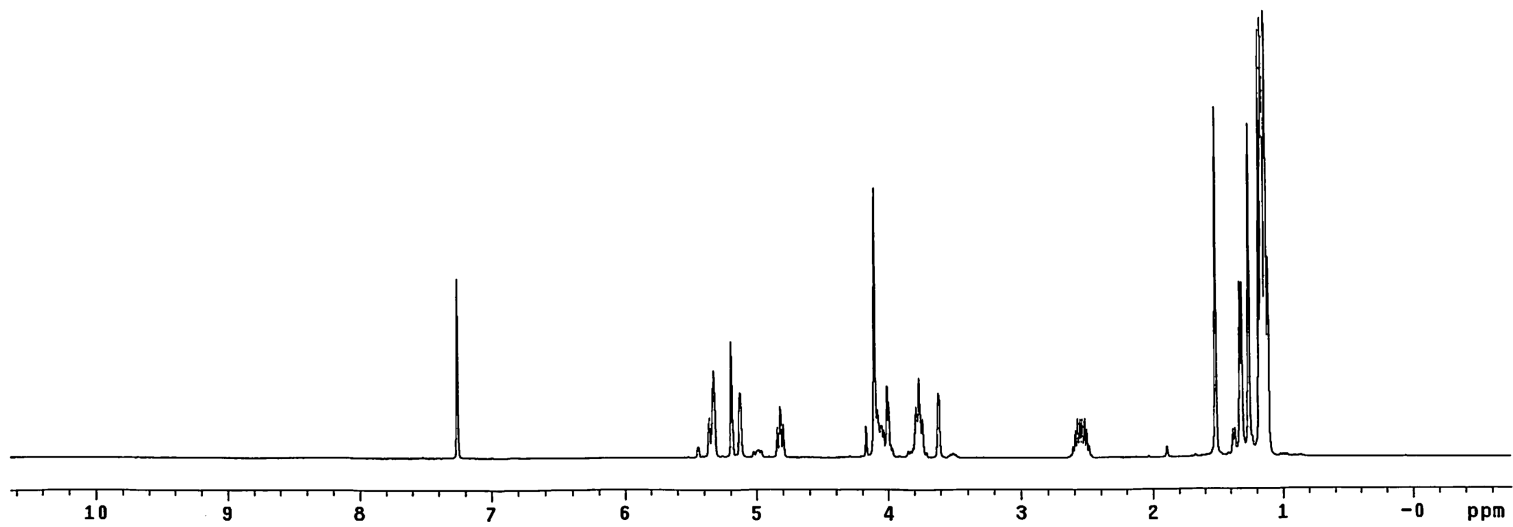

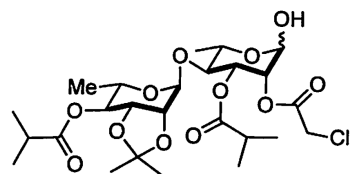

27a

<sup>13</sup>C NMR (CDCl<sub>3</sub>, 100 MHz)

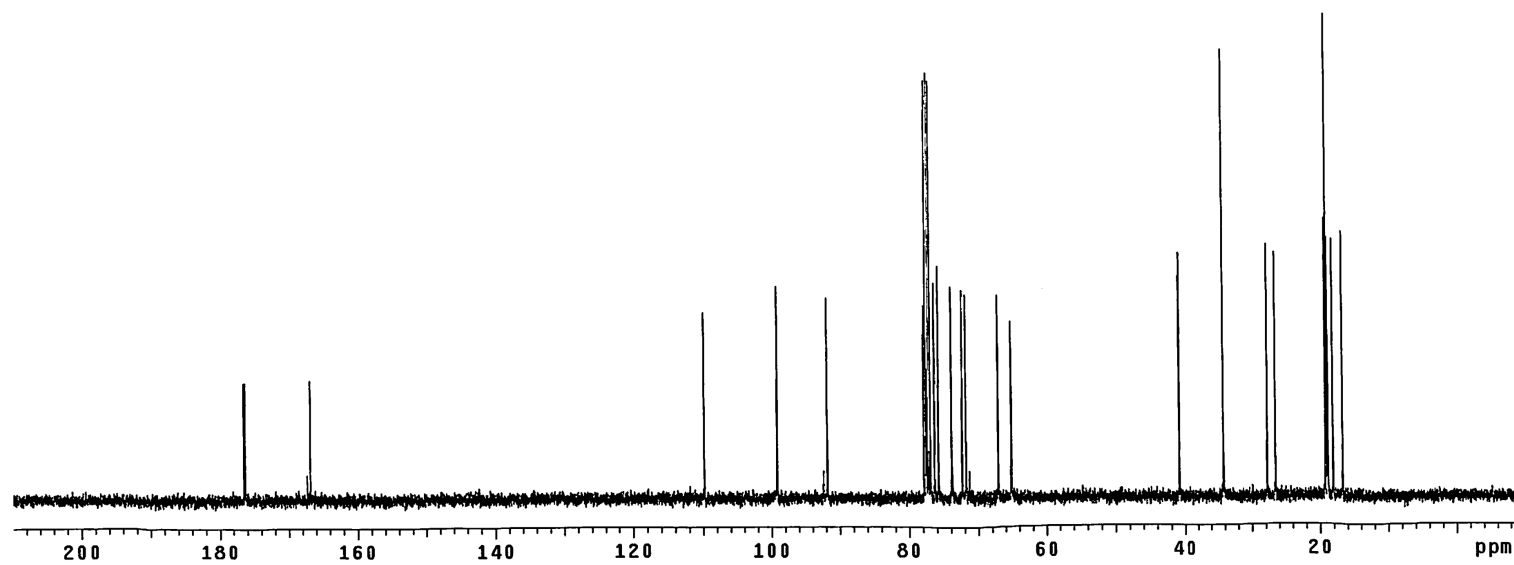

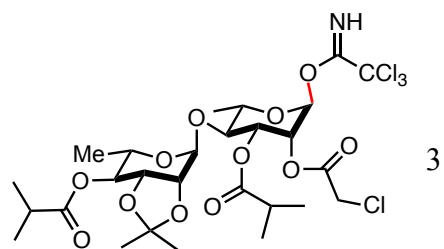

<sup>1</sup>H NMR (benzene-d<sub>6</sub>, 400 MHz)

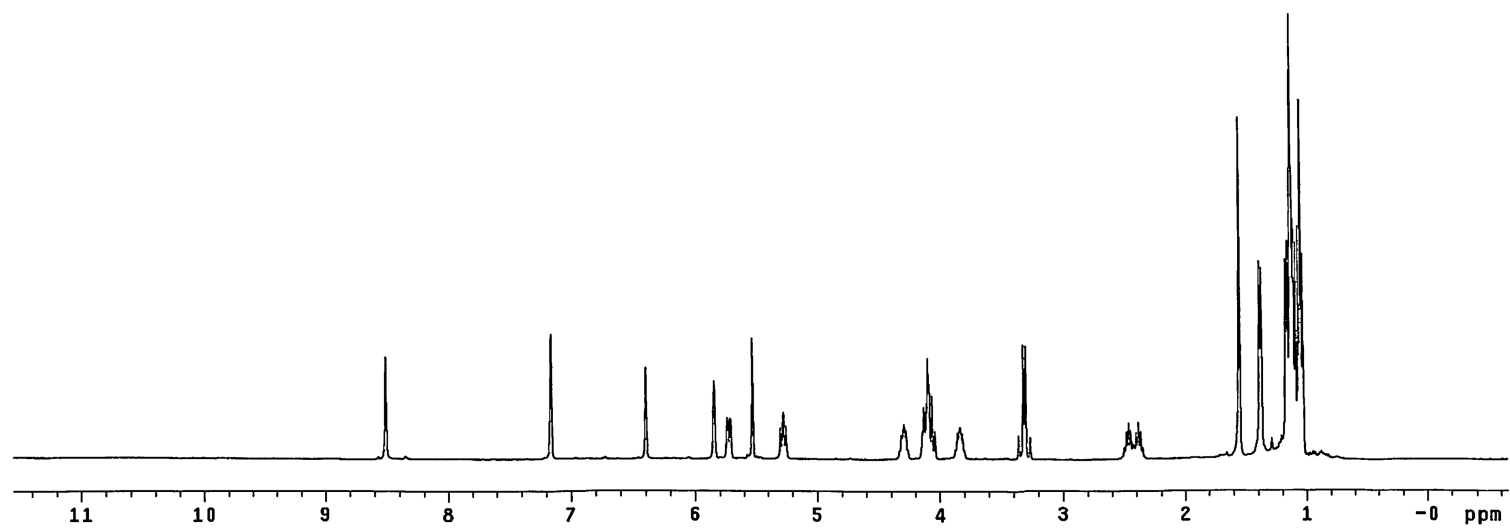

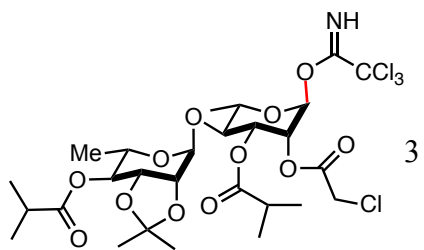

$^{13}\text{C}$  NMR (benzene- $d_6$ , 100 MHz)

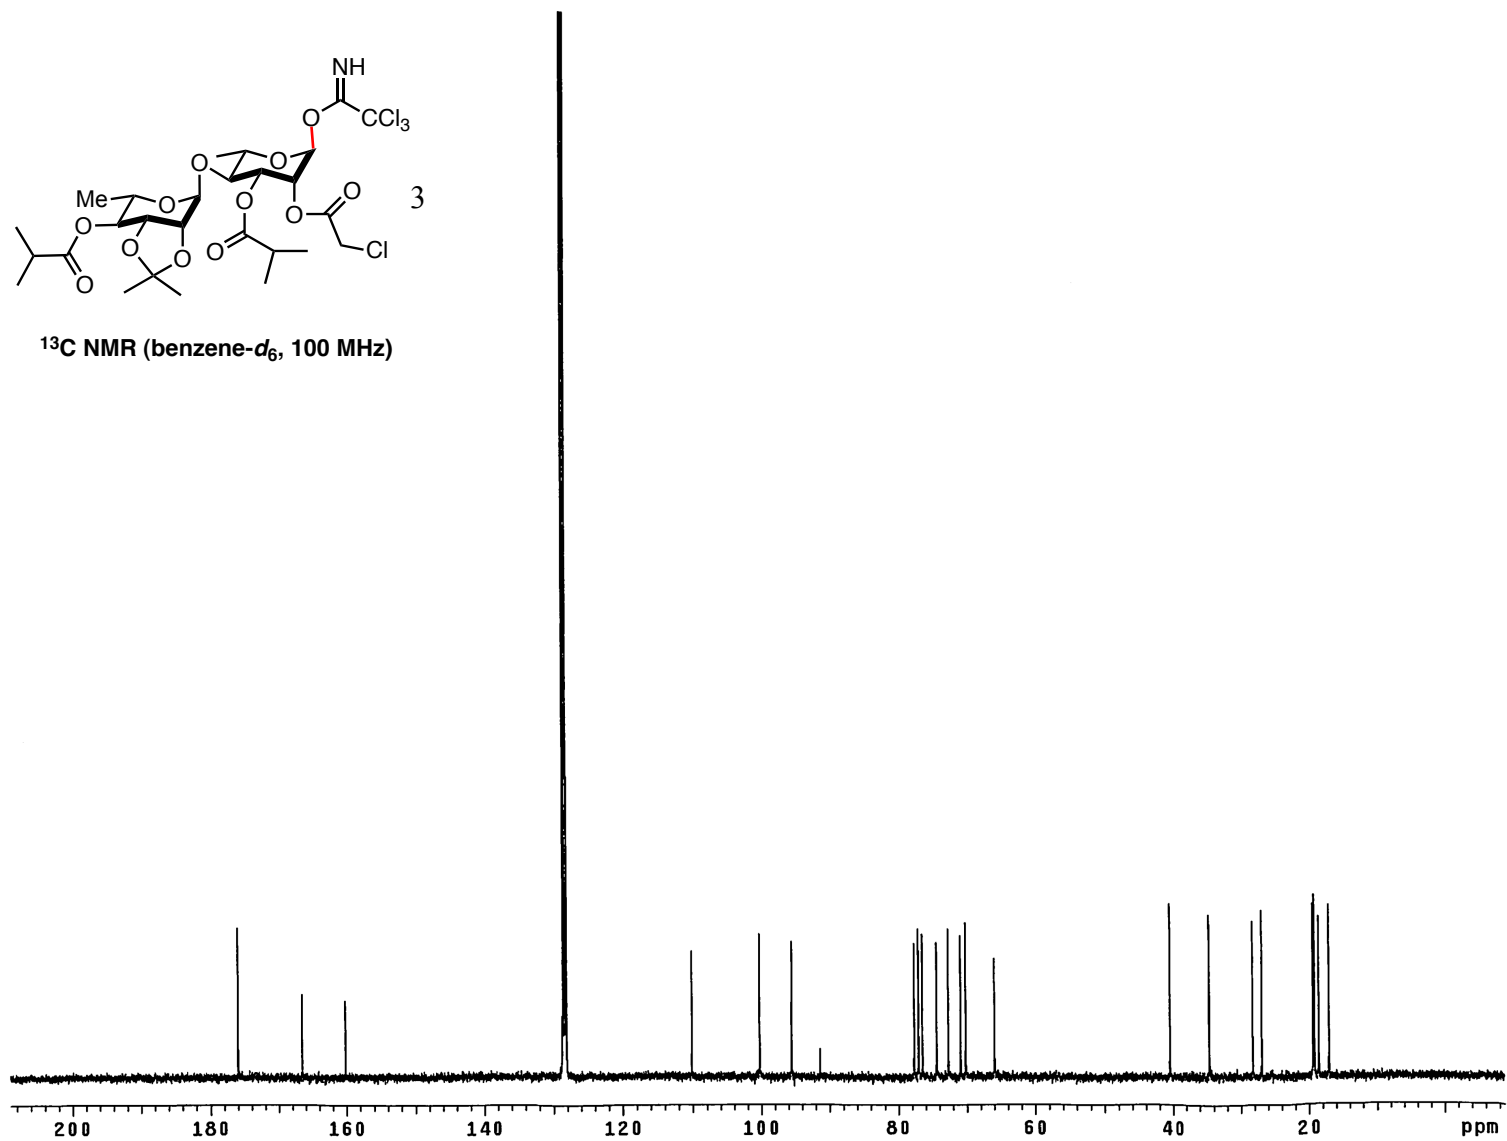

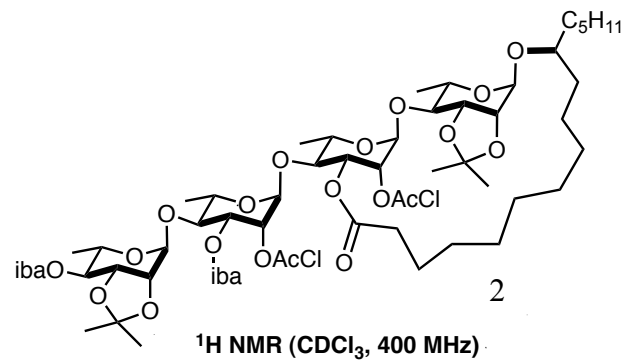

**<sup>1</sup>H NMR (CDCl<sub>3</sub>, 400 MHz)**

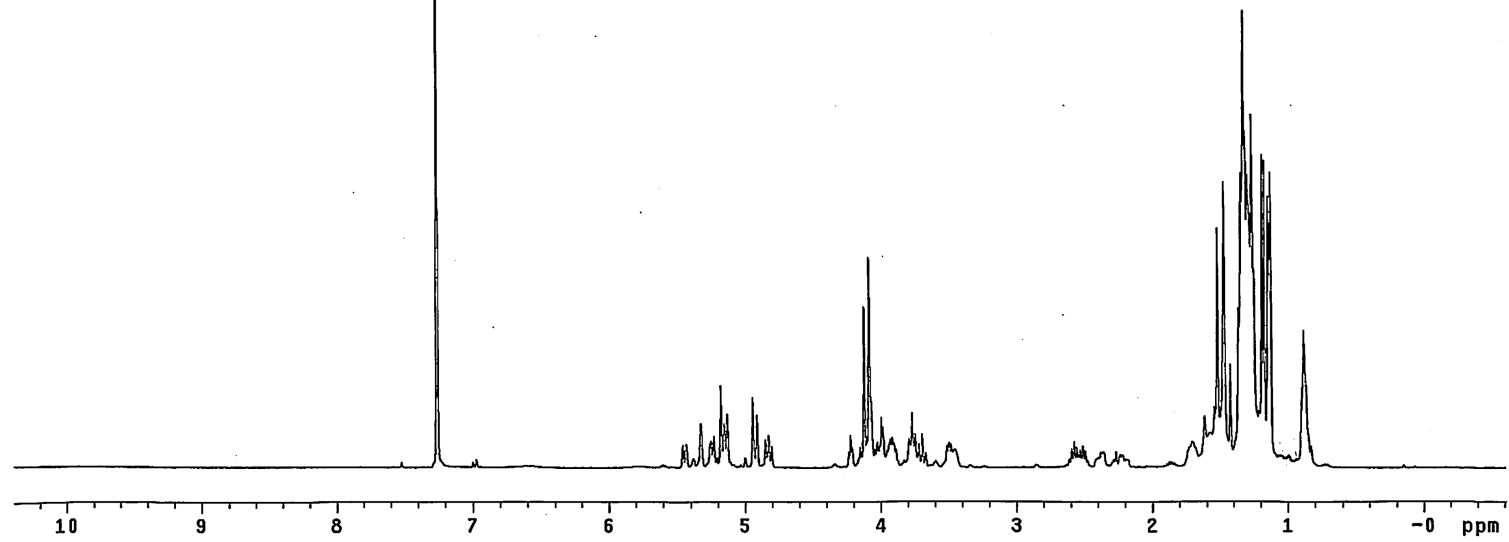

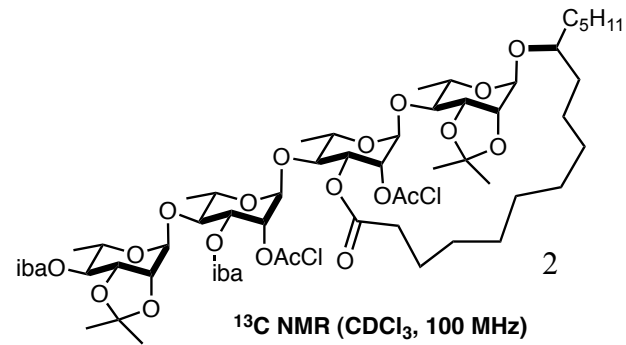

$^{13}C$  NMR ( $CDCl_3$ , 100 MHz)

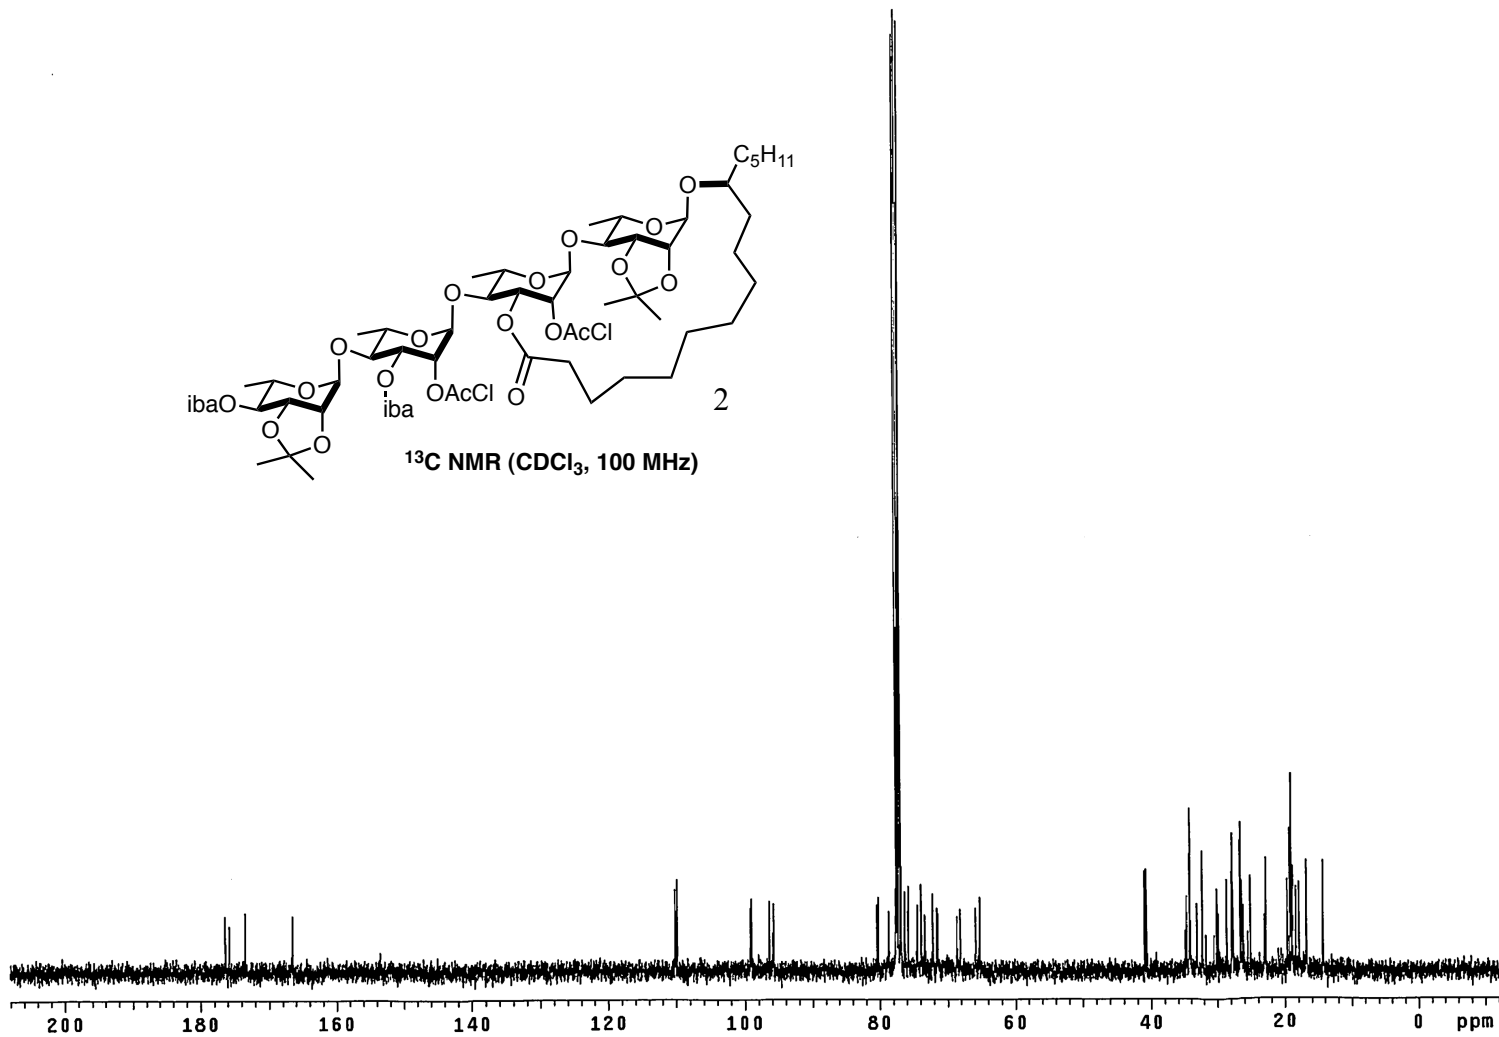

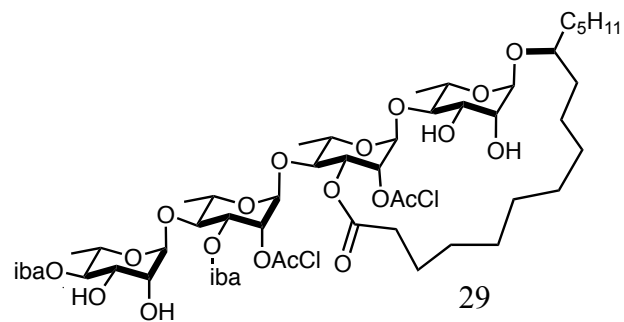

<sup>1</sup>H NMR (CDCl<sub>3</sub>, 500 MHz)

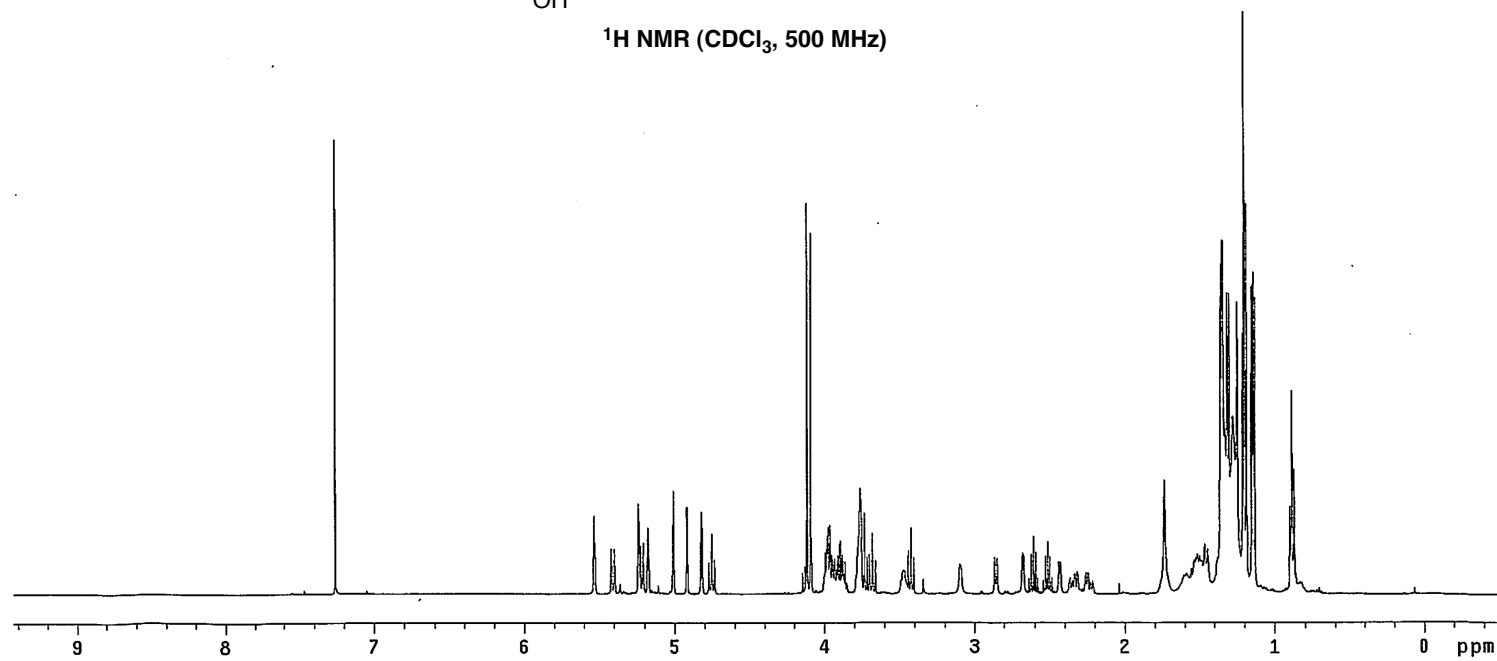



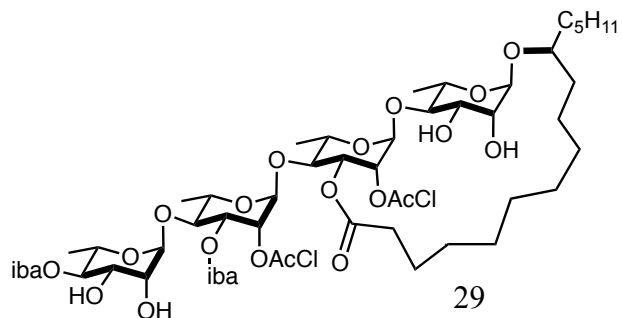

<sup>13</sup>C NMR (CDCl<sub>3</sub>, 100 MHz)

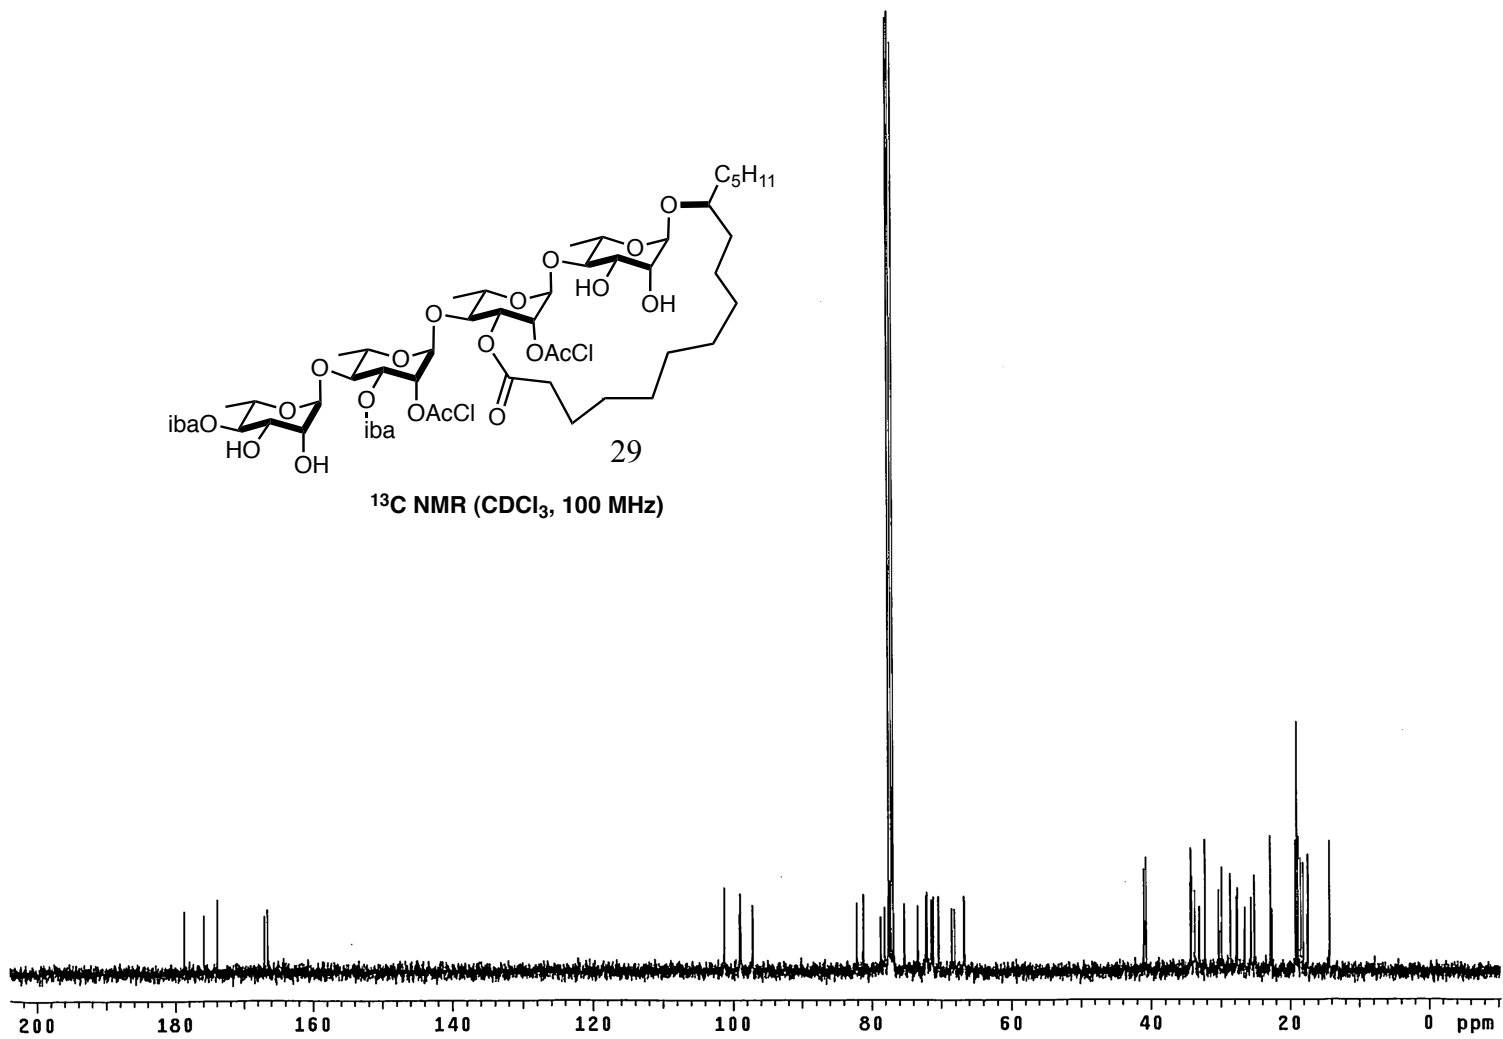

**NMR assignments in  
CDCl<sub>3</sub>, 600 MHz**

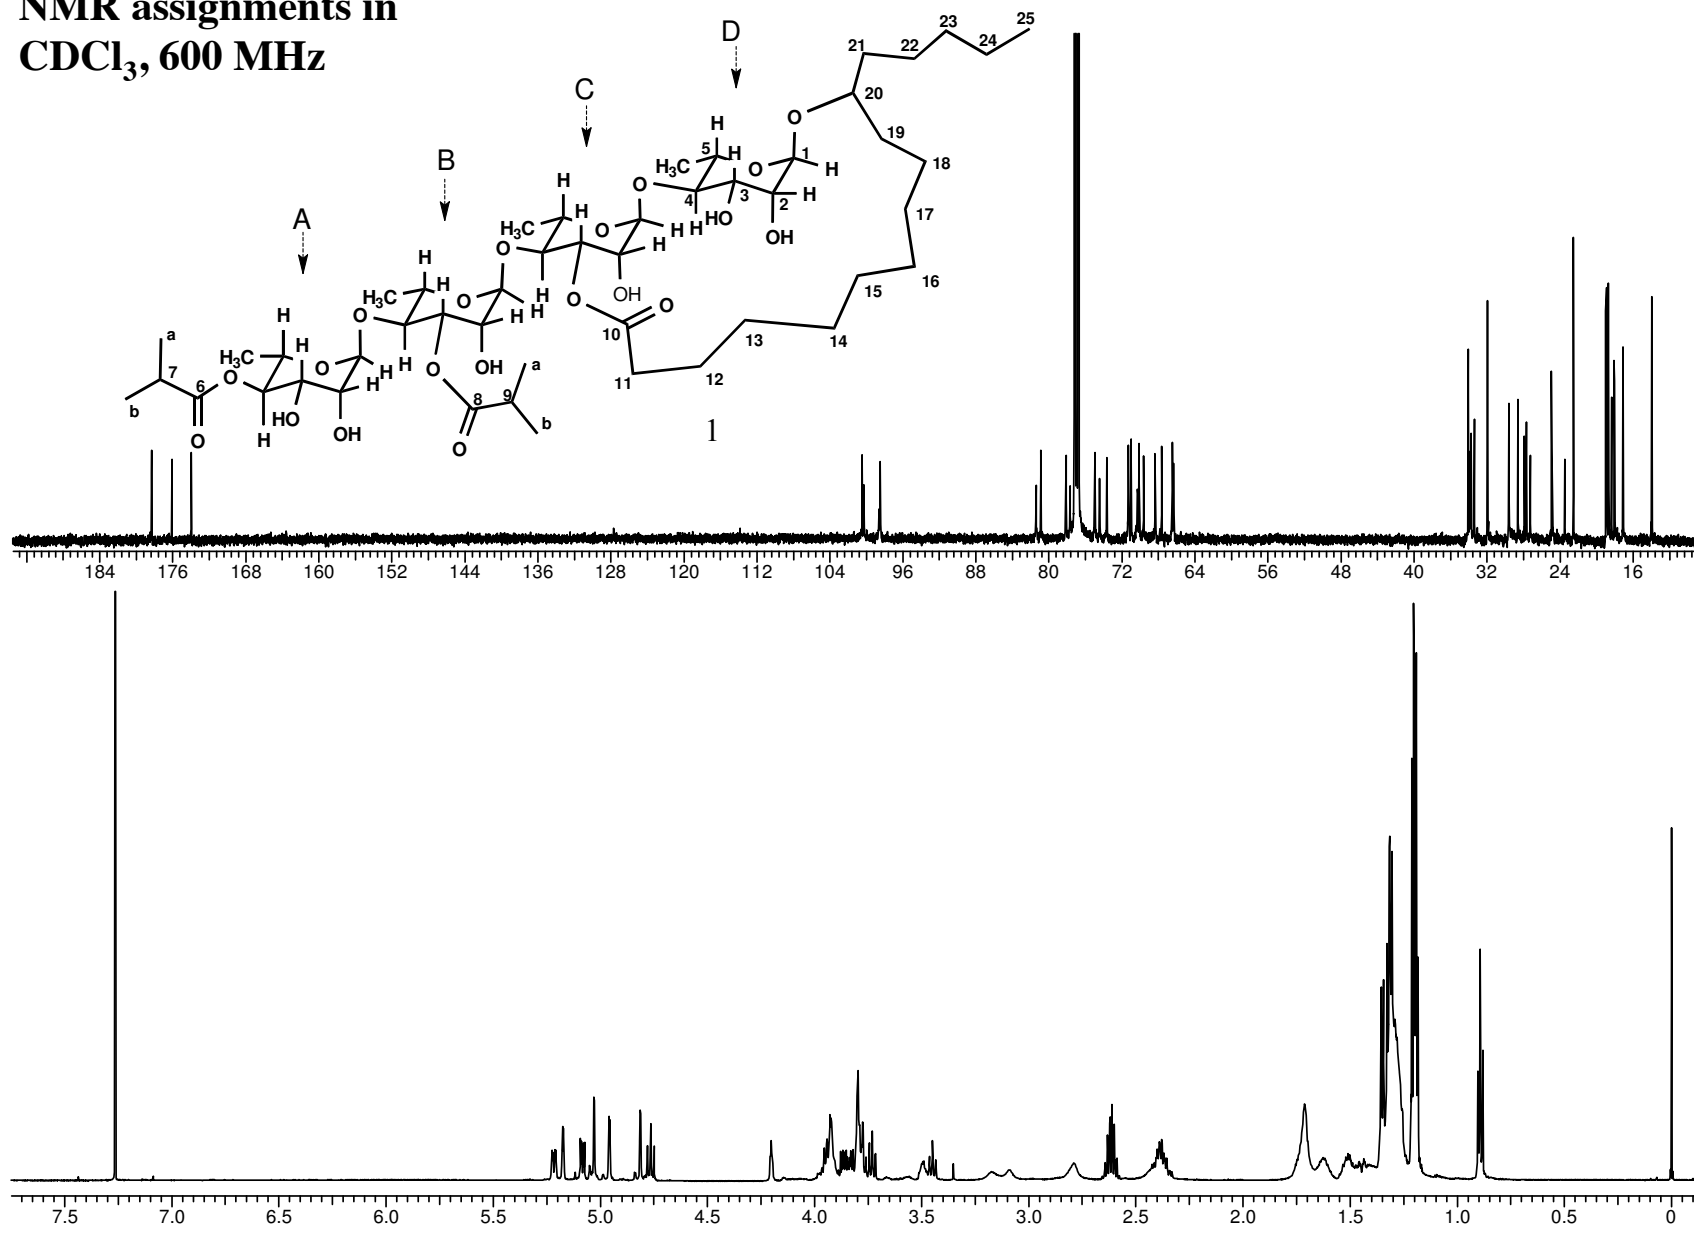

**Spin system identification for each sugar moiety (A-D)** (for synthetic 1)  
 zTOCSY1D experimental subspectra (b-e); Control <sup>1</sup>H NMR spectrum - (a)

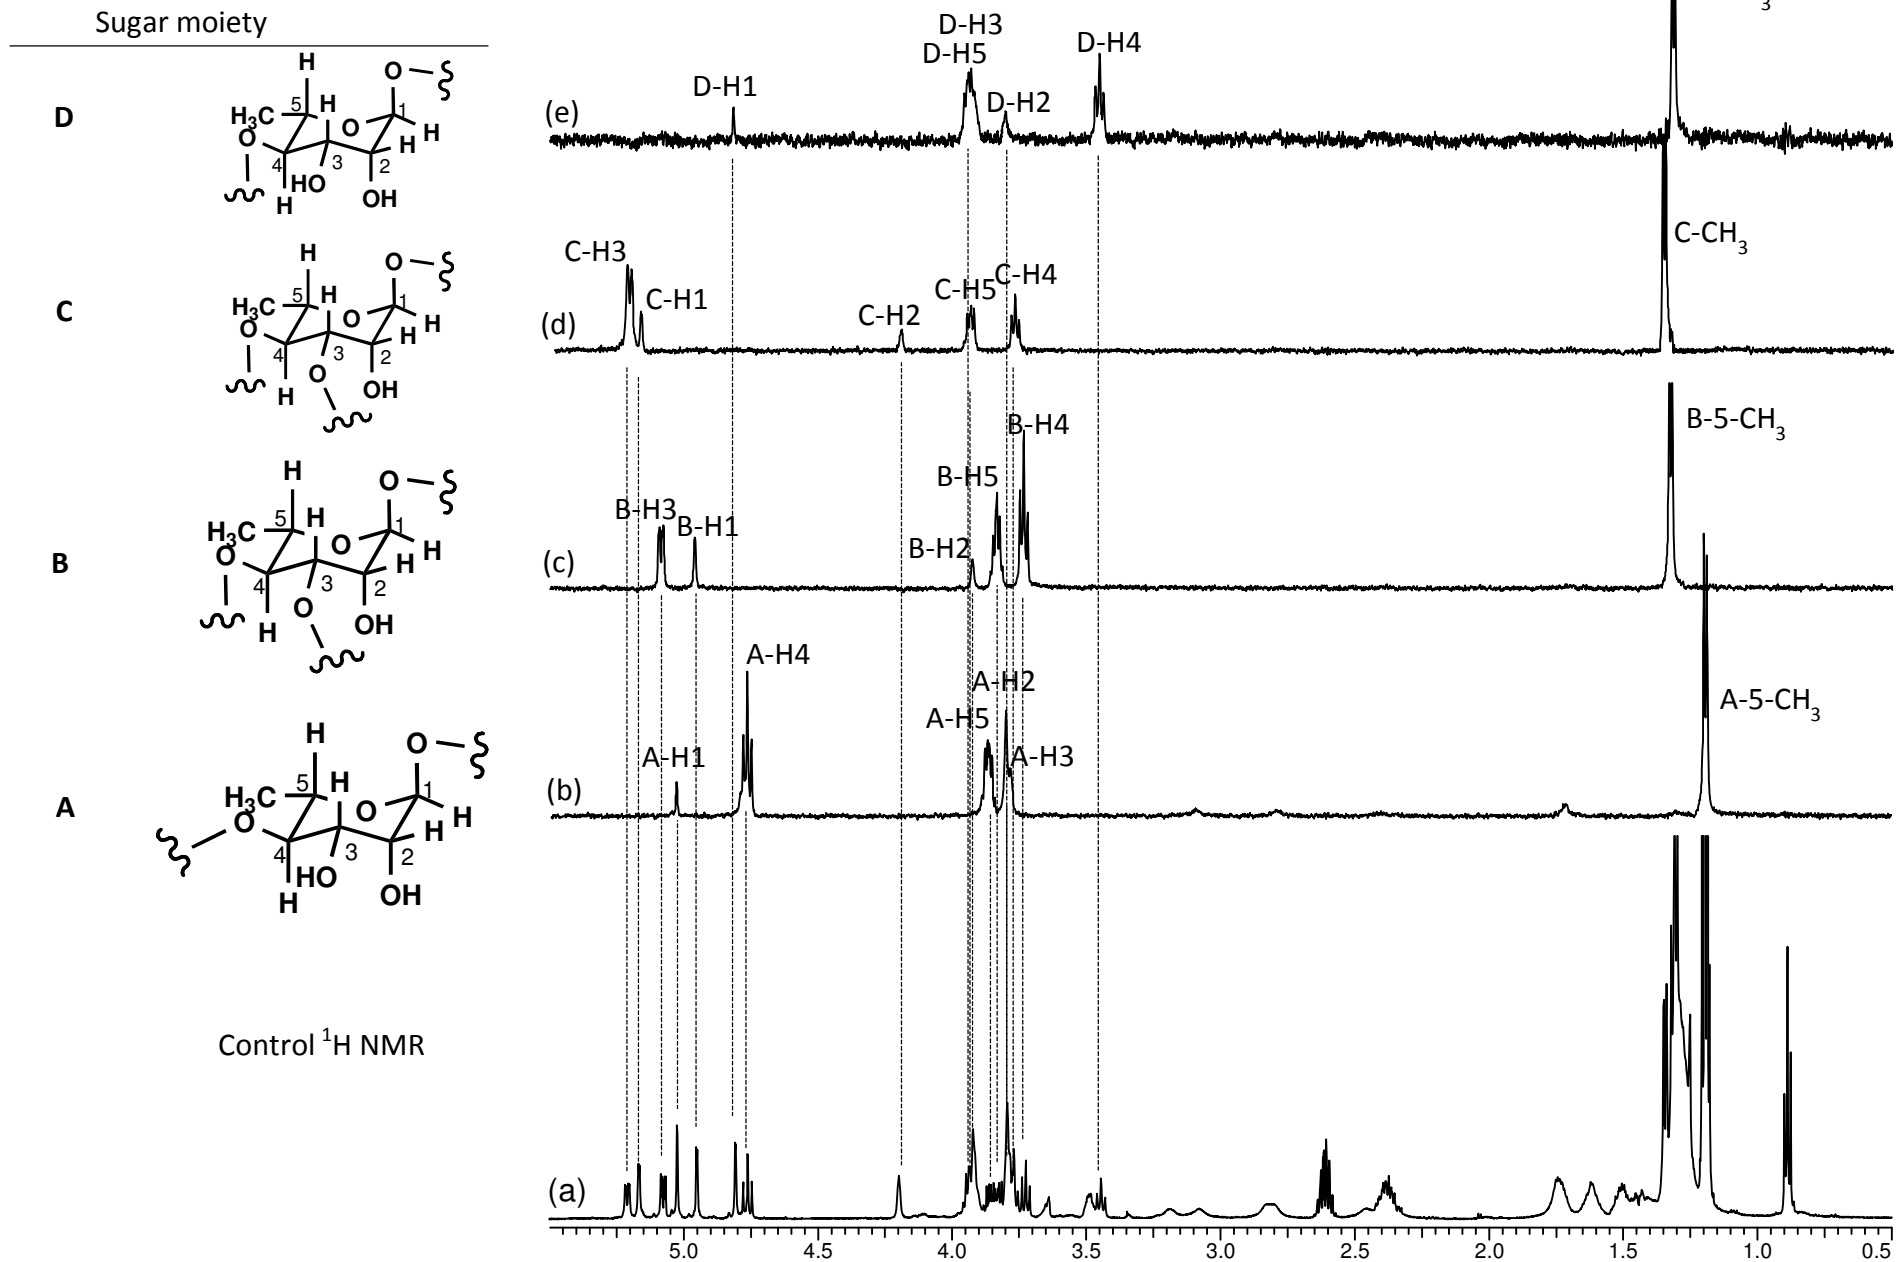

## Calculated (a) and experimental (b) splitting patterns

\*Chemical shifts and coupling constants of the overlapped proton peaks **B-H2**, **D-H3**, **C-H5**, **D-H5**, **A-H5**, **B-H5**, **D-H2**, **A-H2**, **A-H3**, **C-H4** were identified using high-resolution 1D zTOCSY experiments

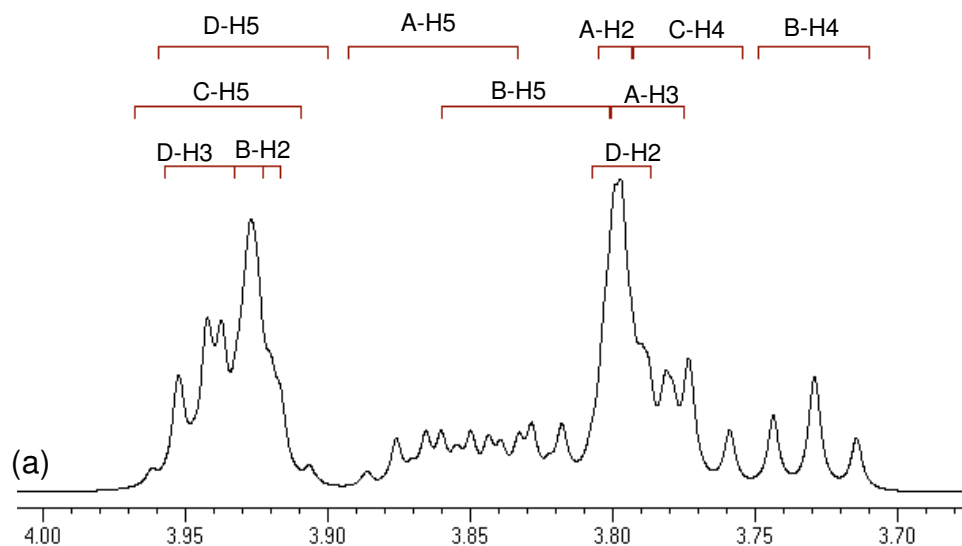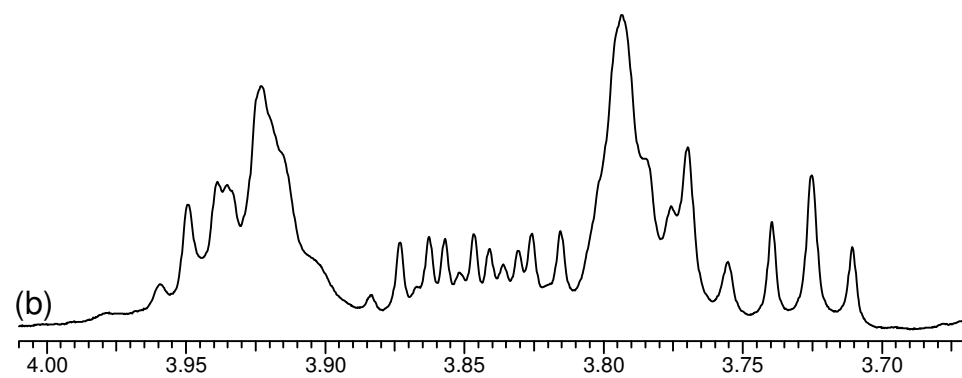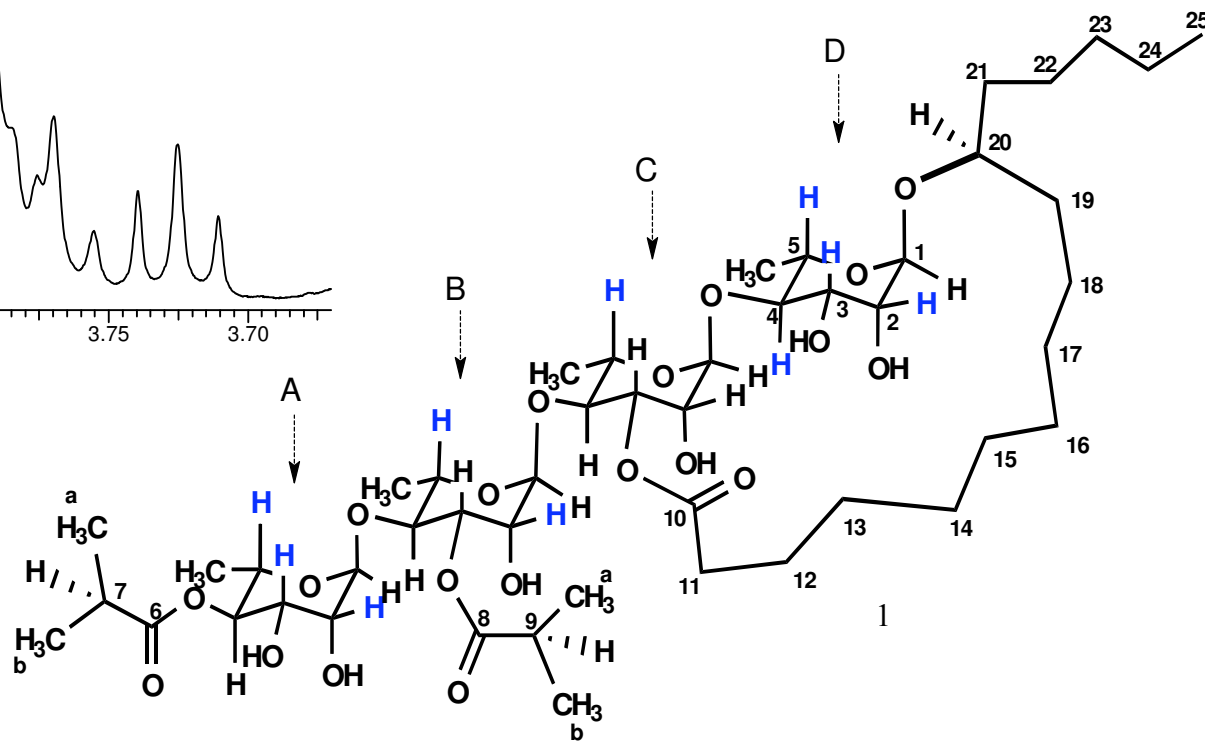

calculated (a) and experimental (b) splitting patterns

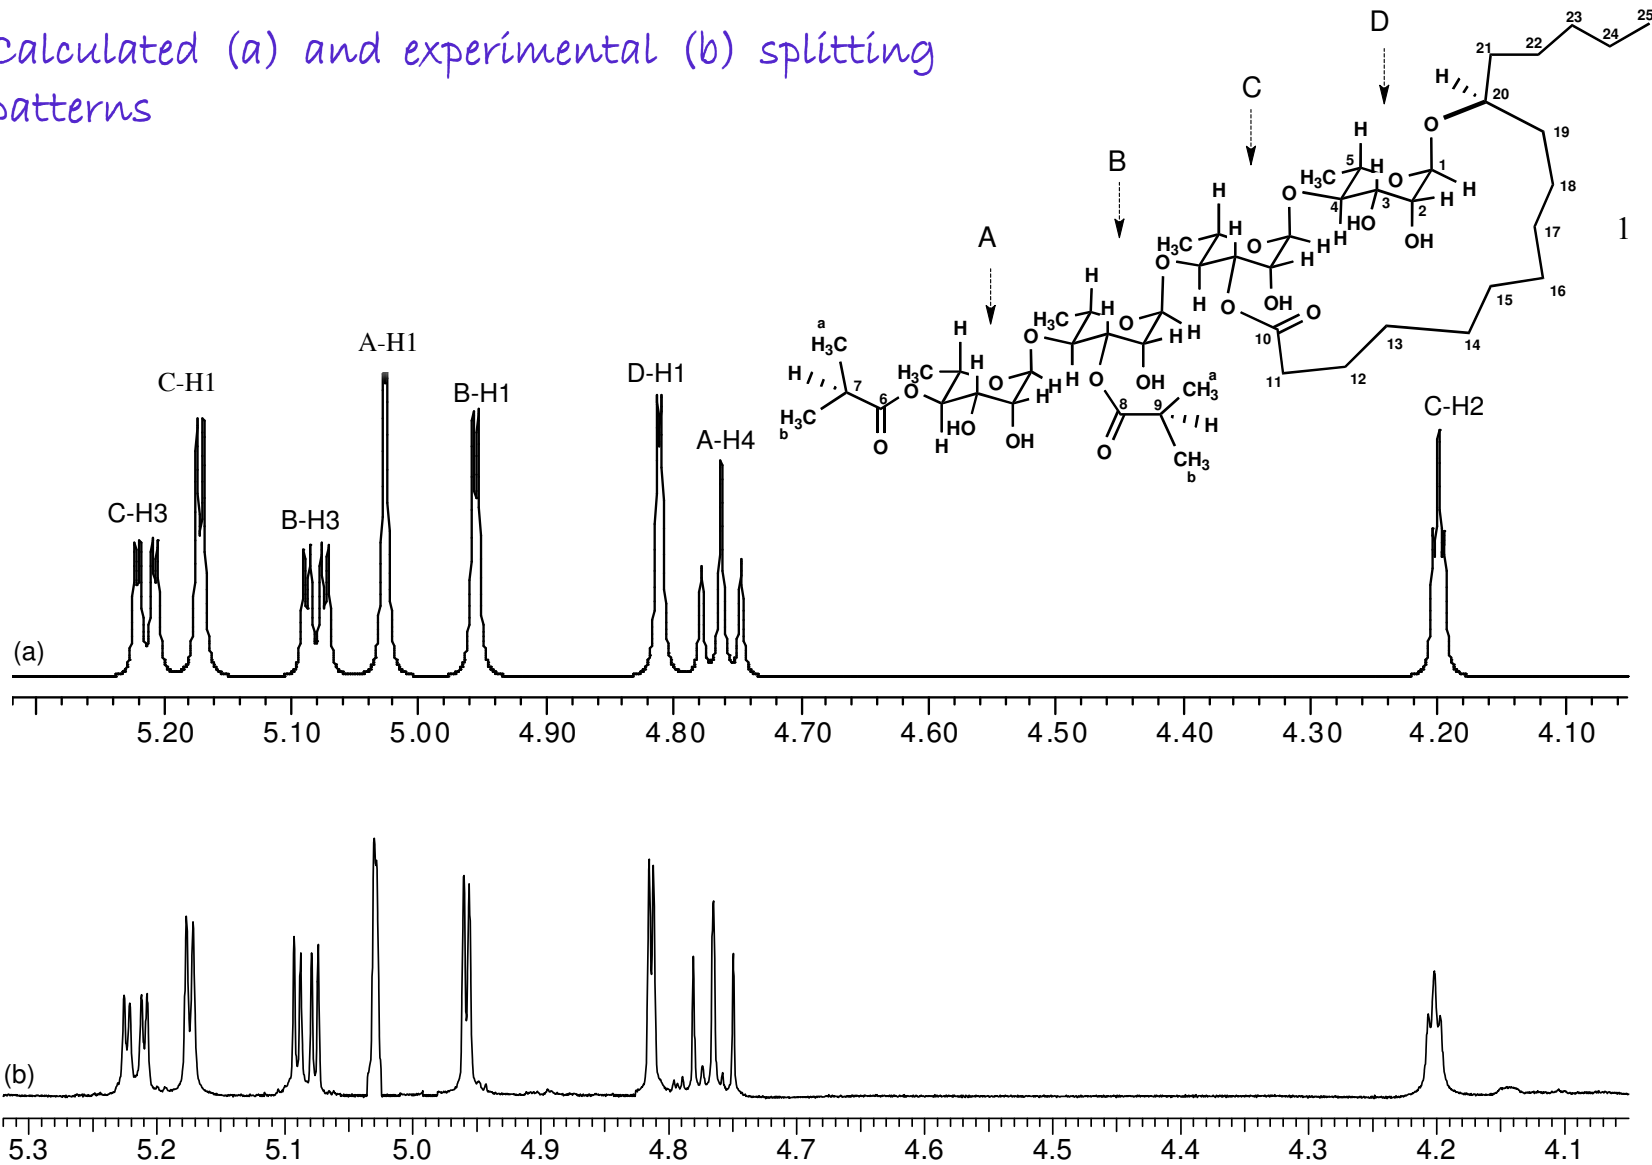

Calculated (a) and experimental (b) splitting patterns

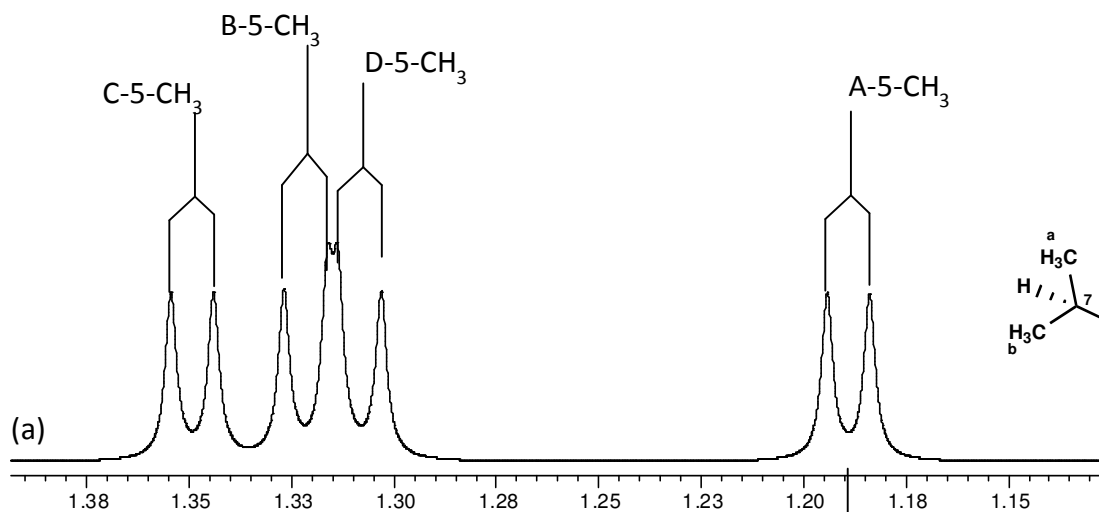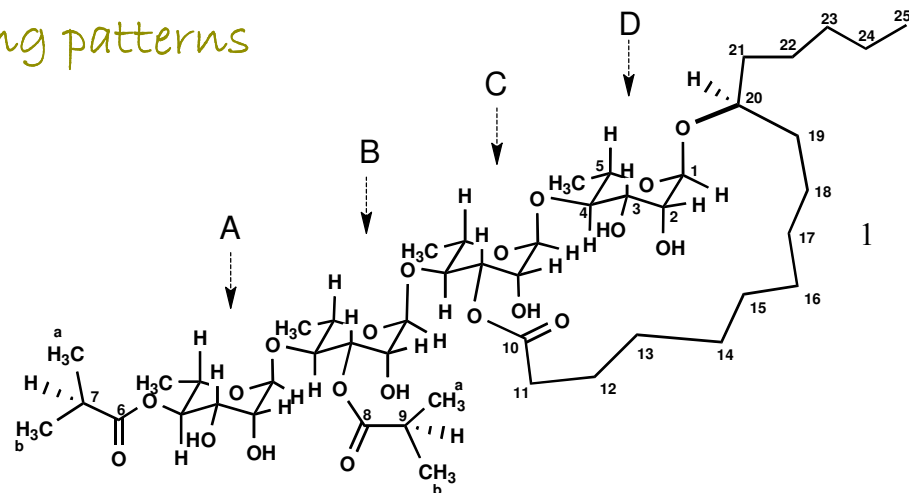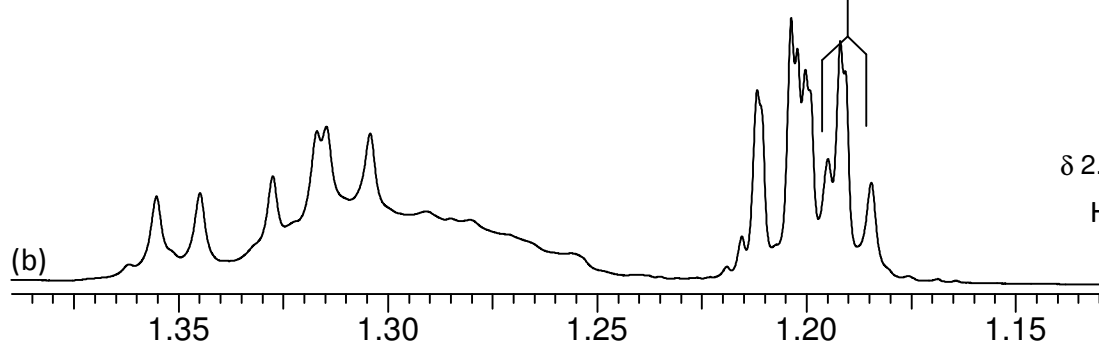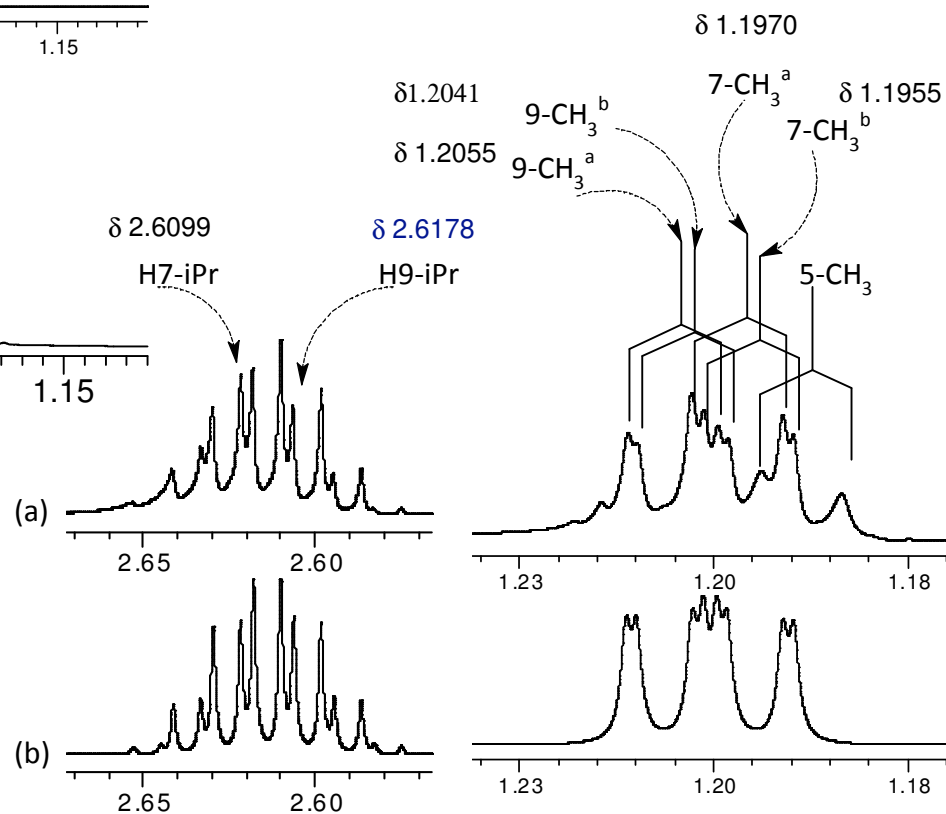

Selective excitation of H20 at 3.50 ppm (a);

Selective excitation of H25 (CH<sub>3</sub>) at 0.89 ppm (b);

Control <sup>1</sup>H NMR spectrum (c).

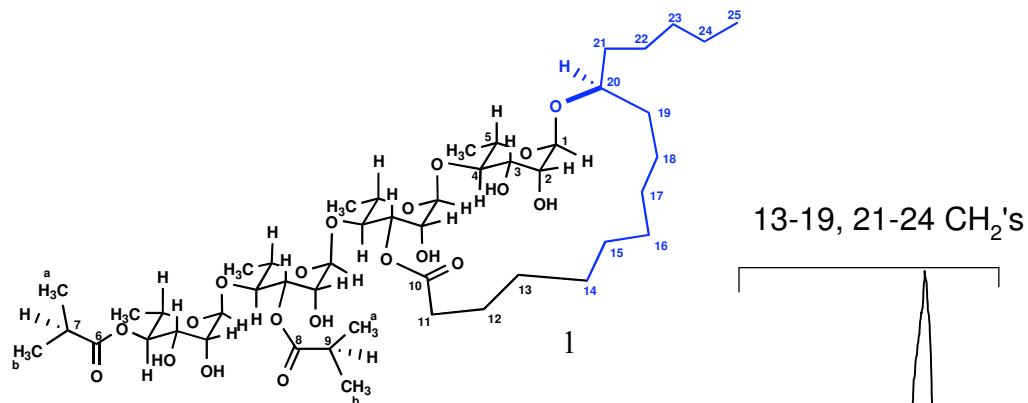

(a)

(b)

(c)

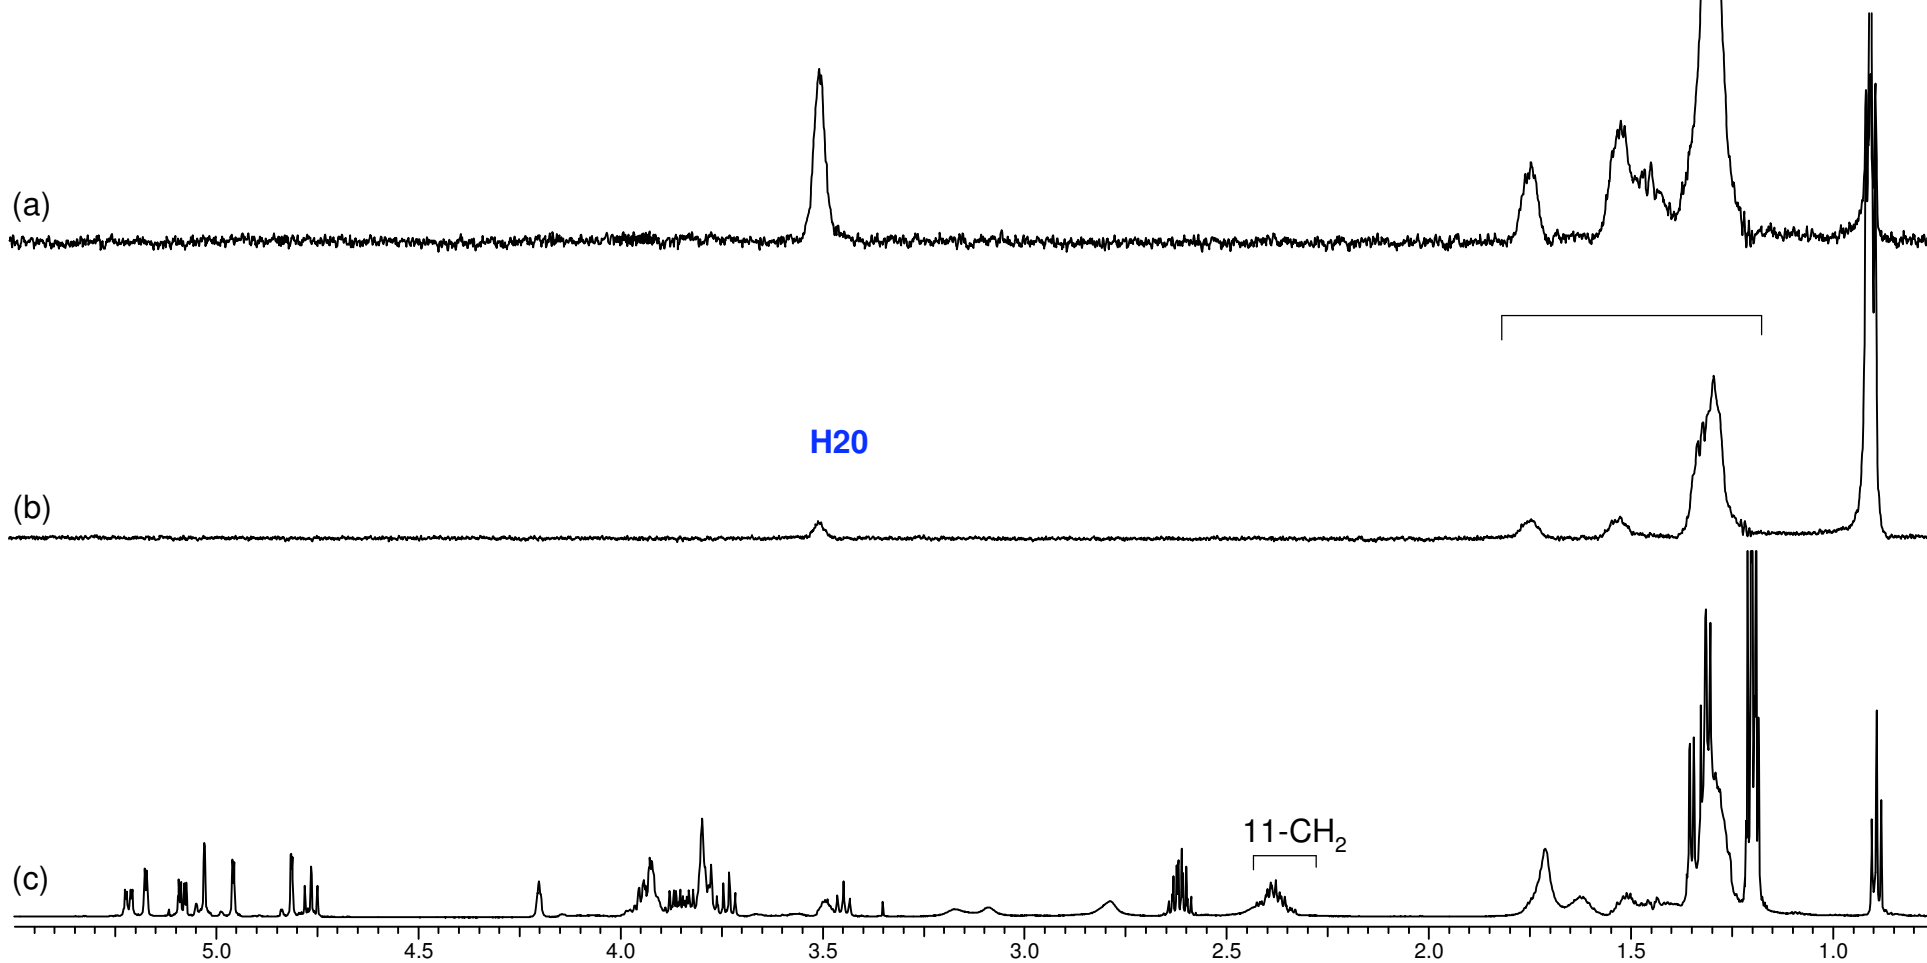

# DPFGSENOE spectrum

Selective excitation of B-H3 at 5.08 ppm

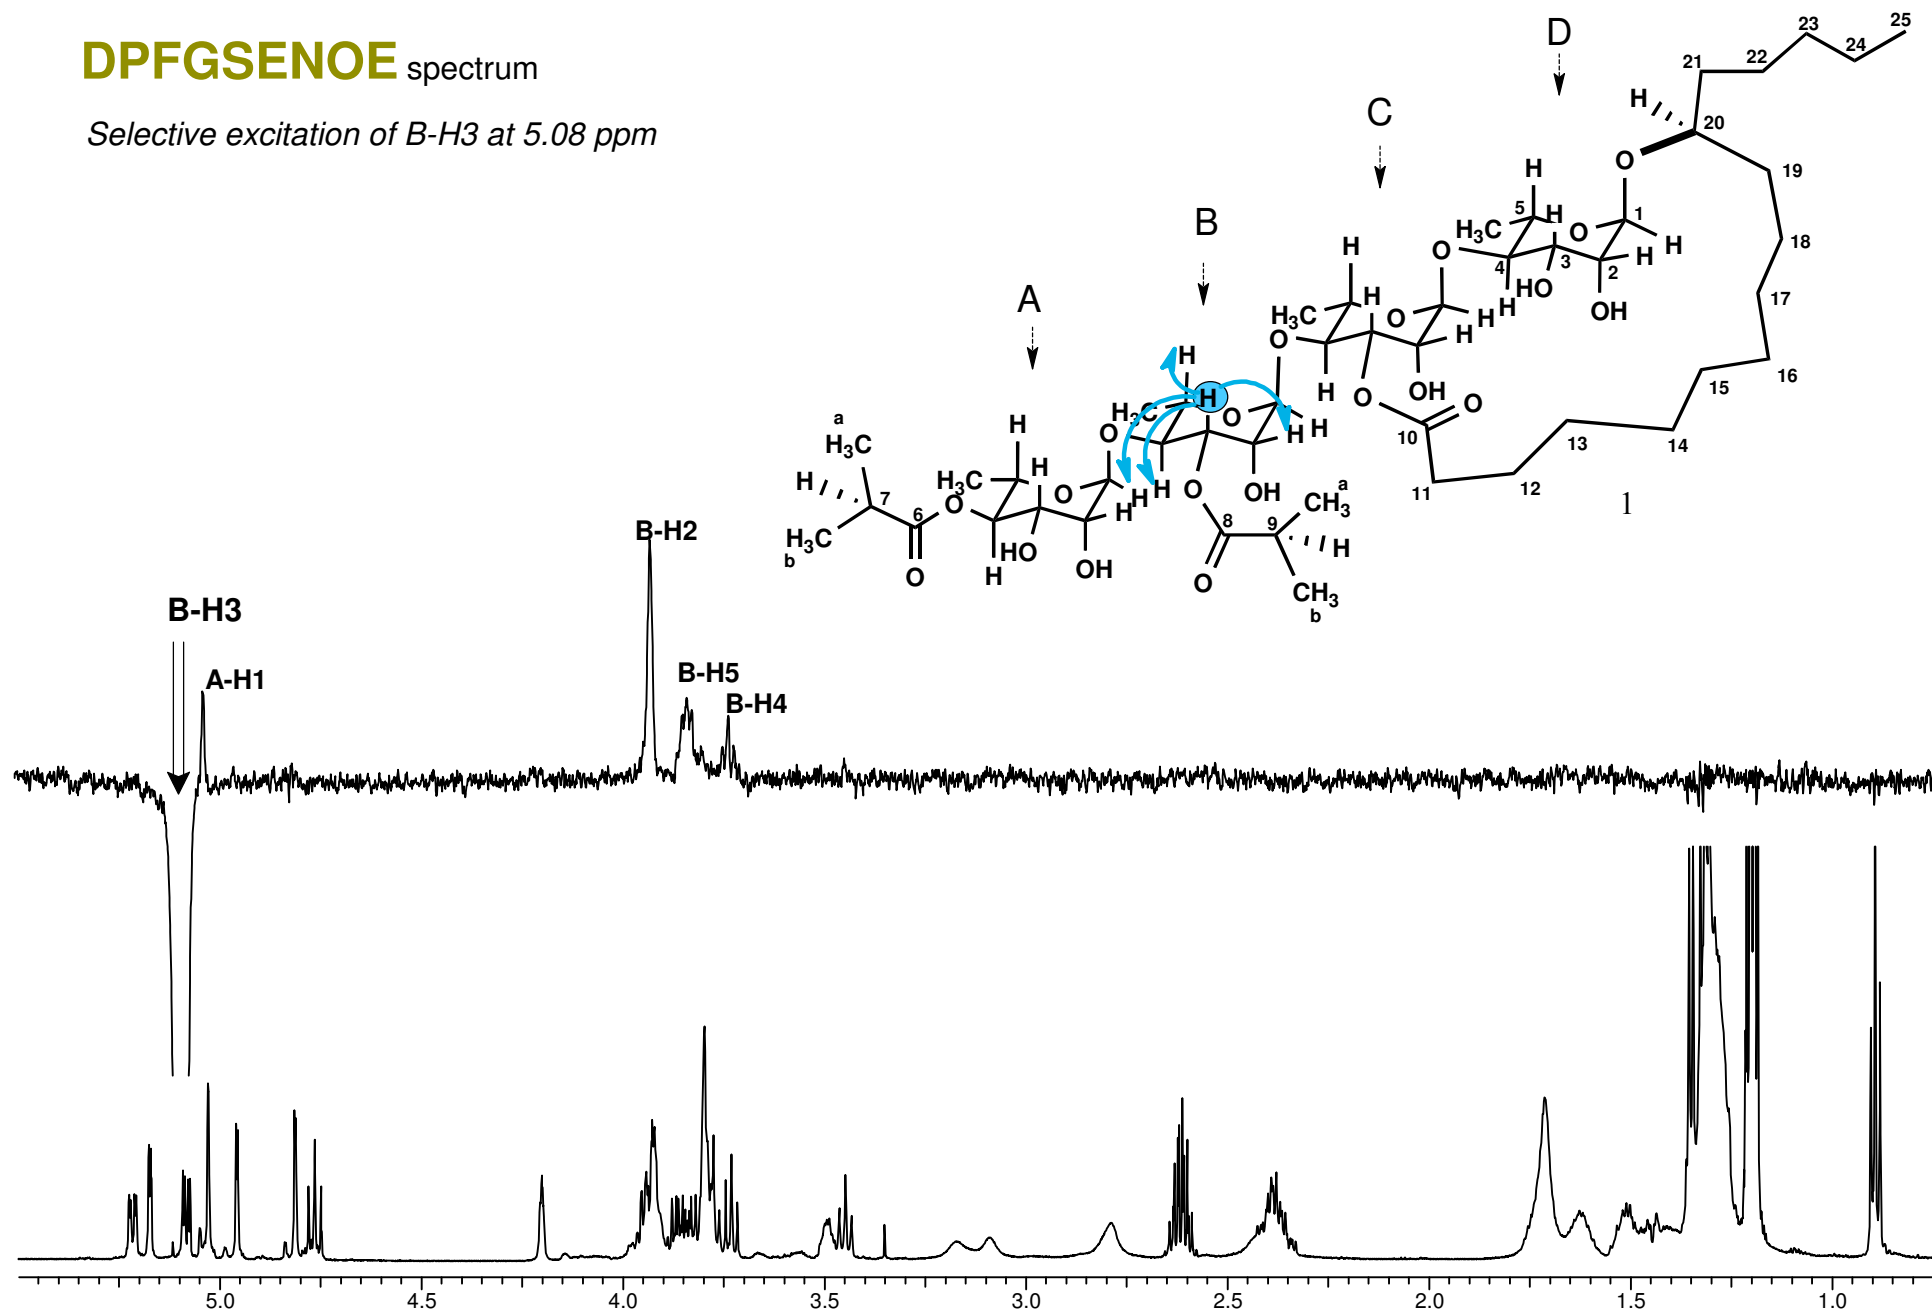



# DPFGSENOE spectrum

Selective excitation of C-H3 at 5.21 ppm

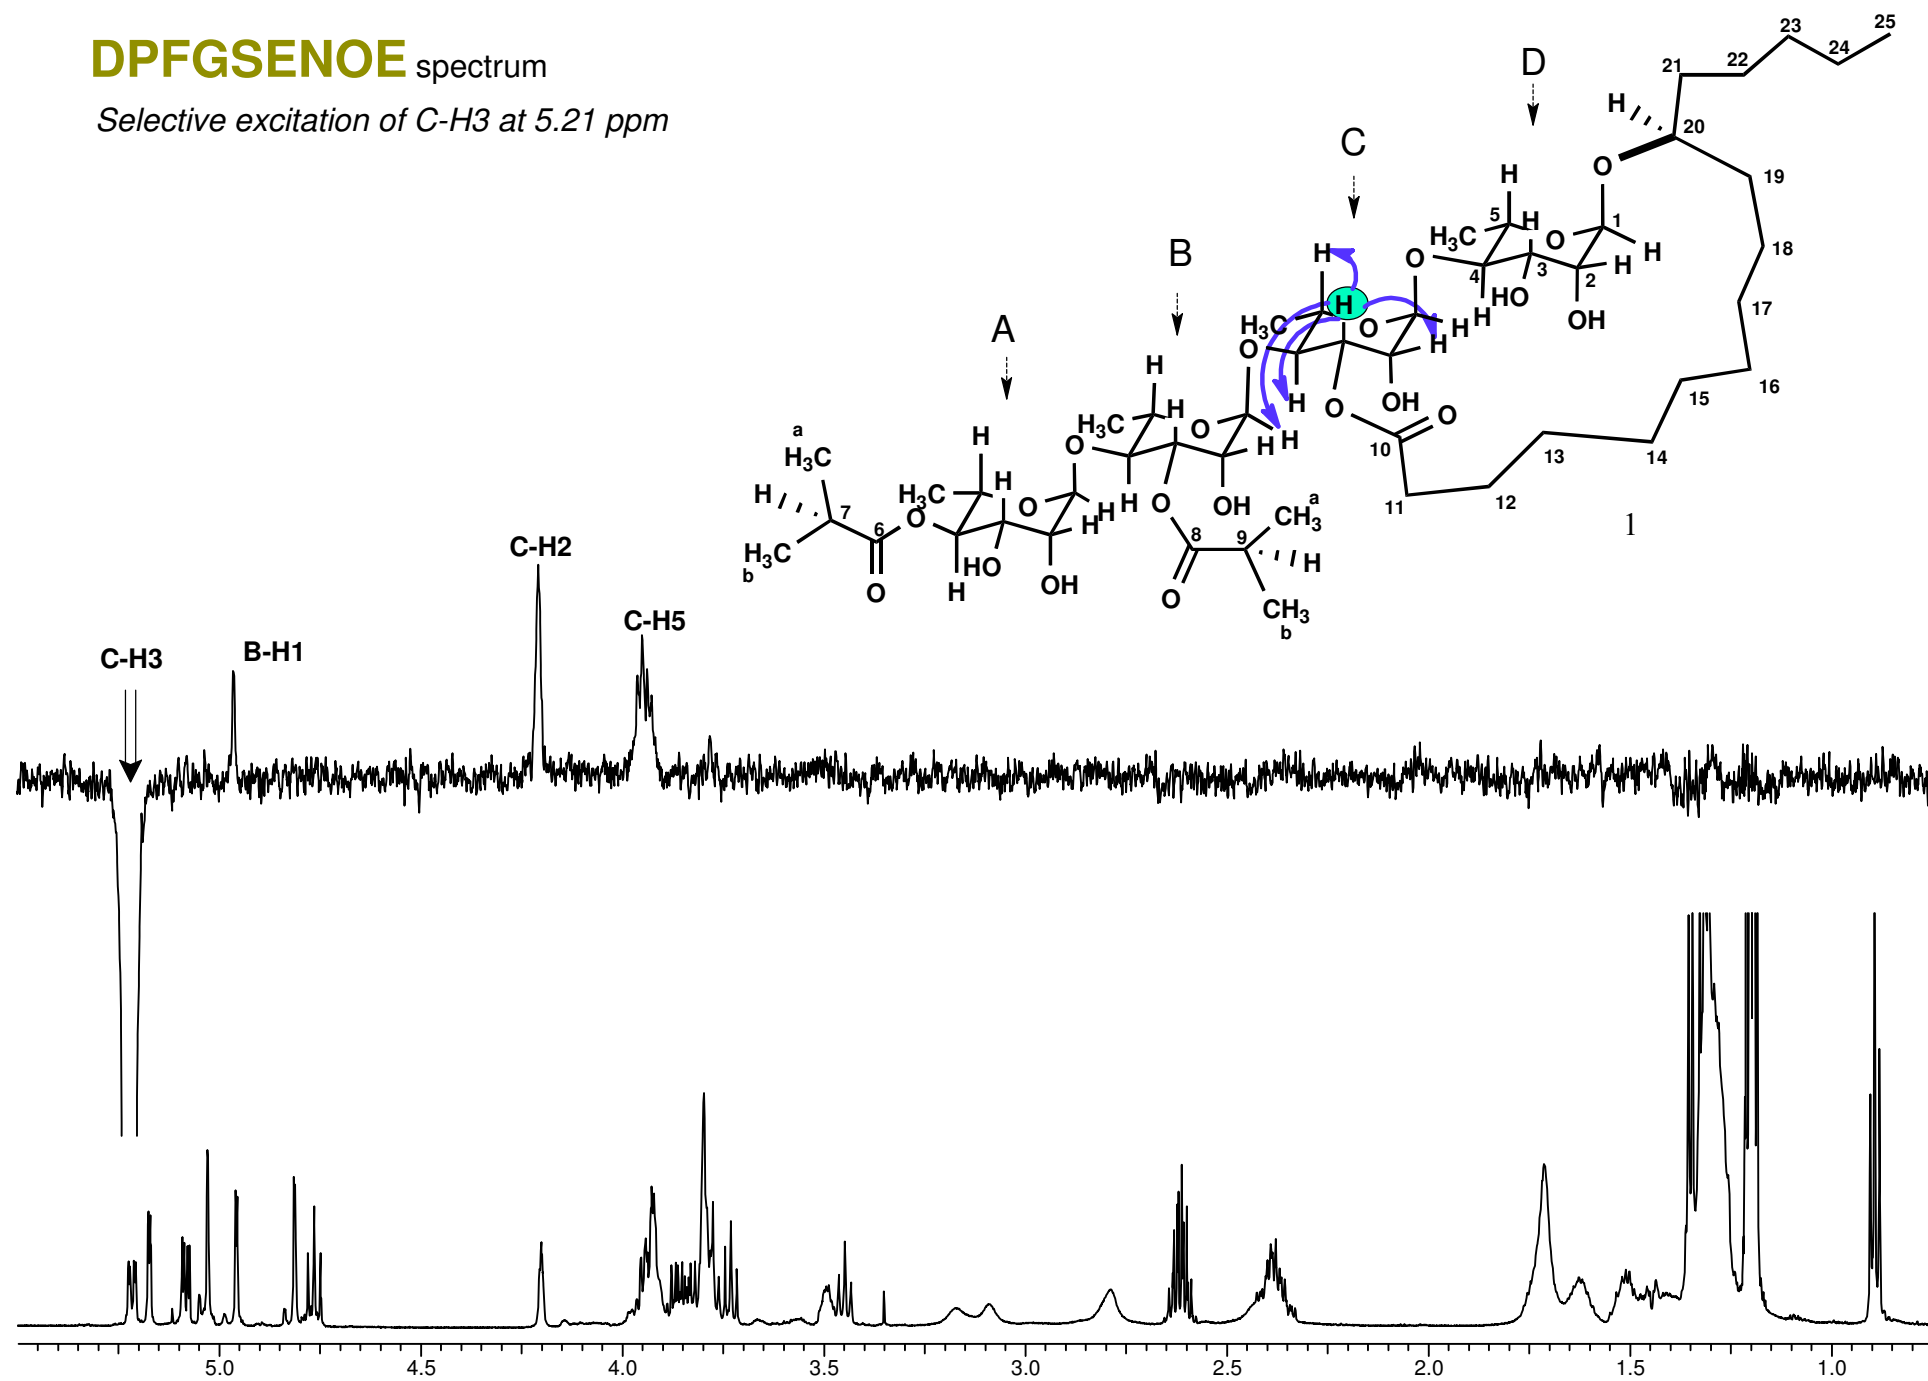

# gCOSY spectrum

(for synthetic 1)

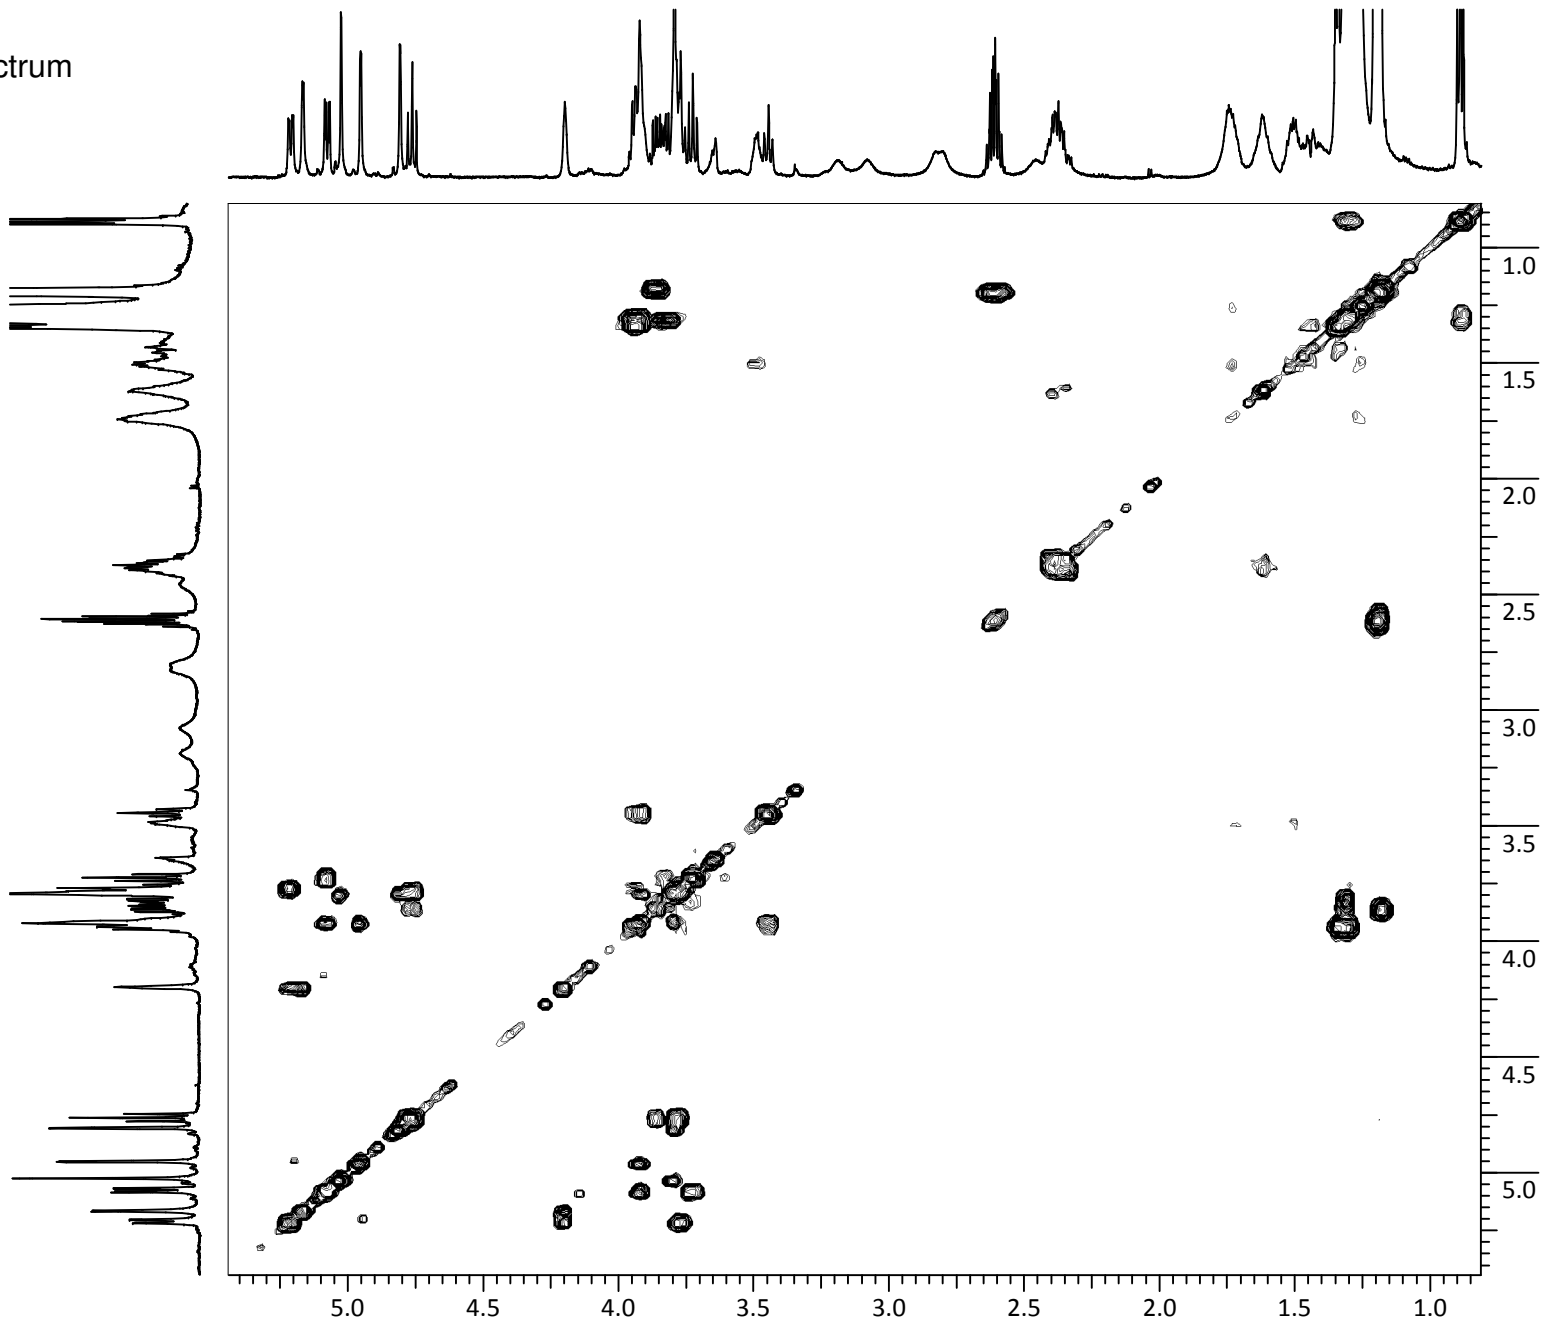

Expanded portion of  
the **gCOSY** spectrum

(for synthetic 1)

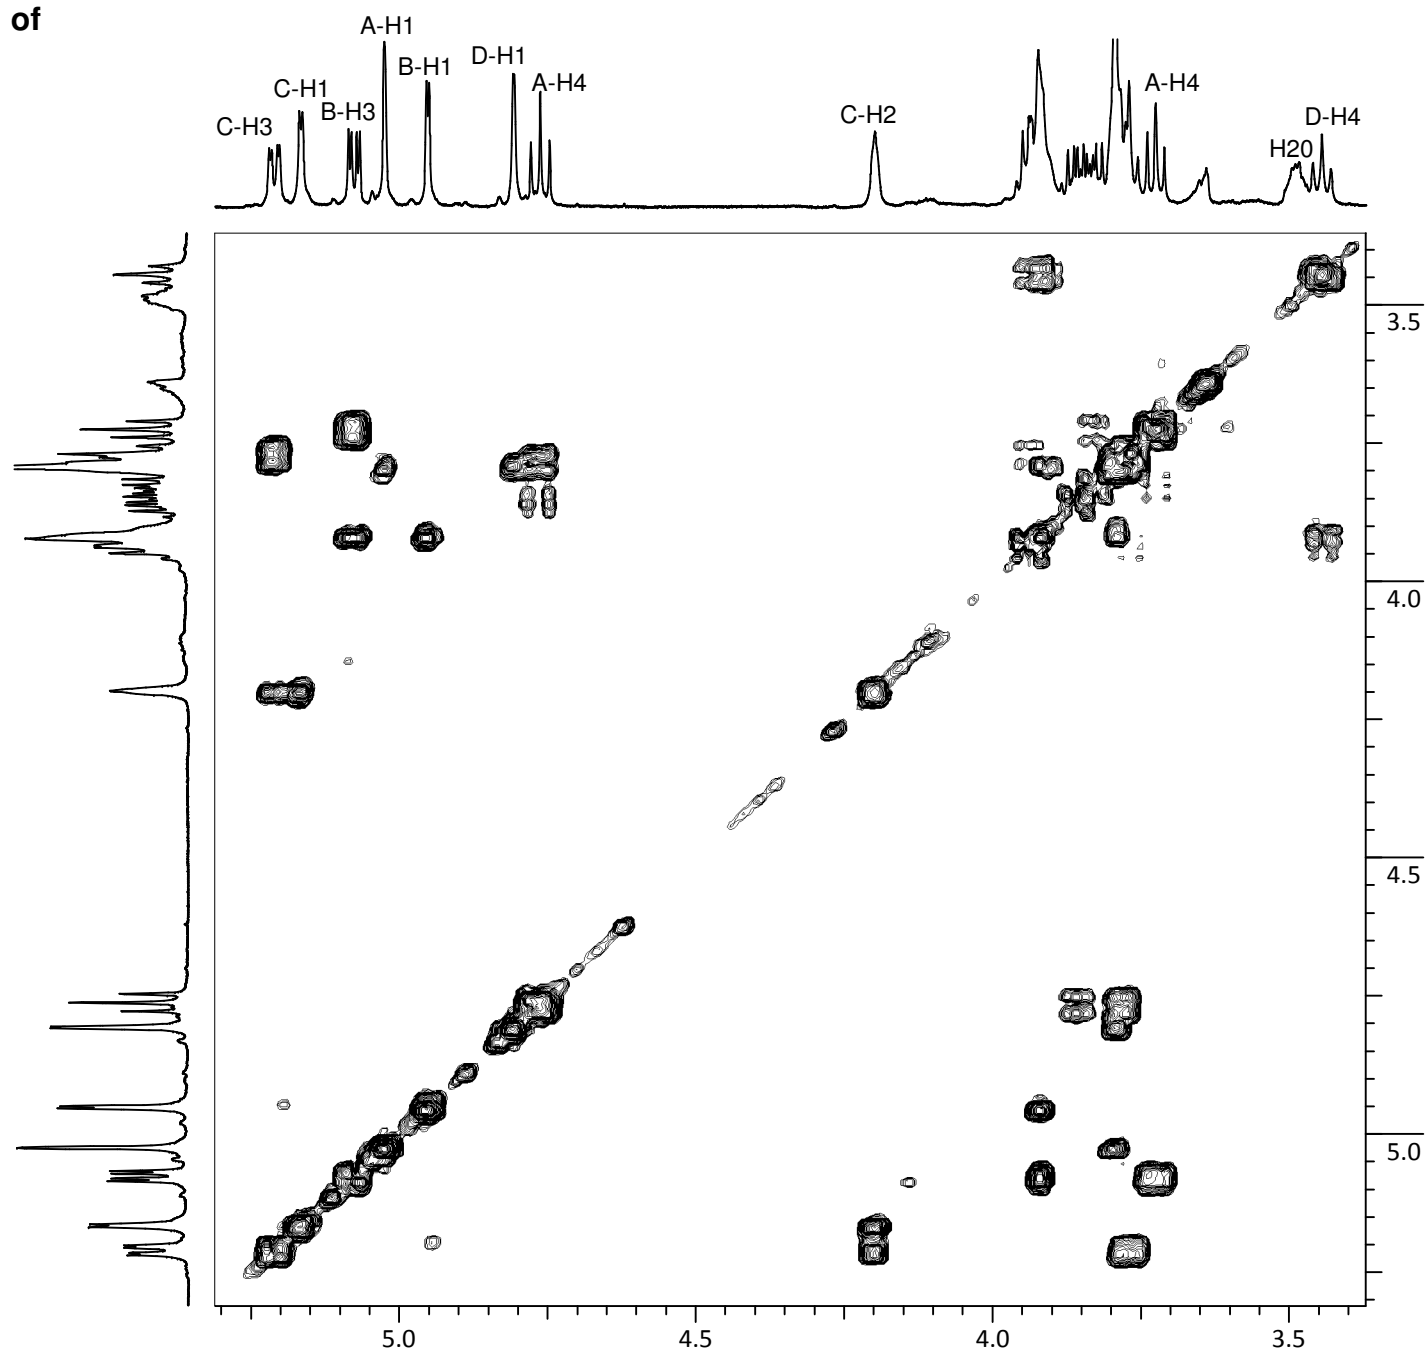

Expanded portions of the **gCOSY** spectrum

**$^1\text{H}$ - $^1\text{H}$  connectivities**

identification of overlapped A-H5, B-H5, C-5 and D-H5 proton resonances

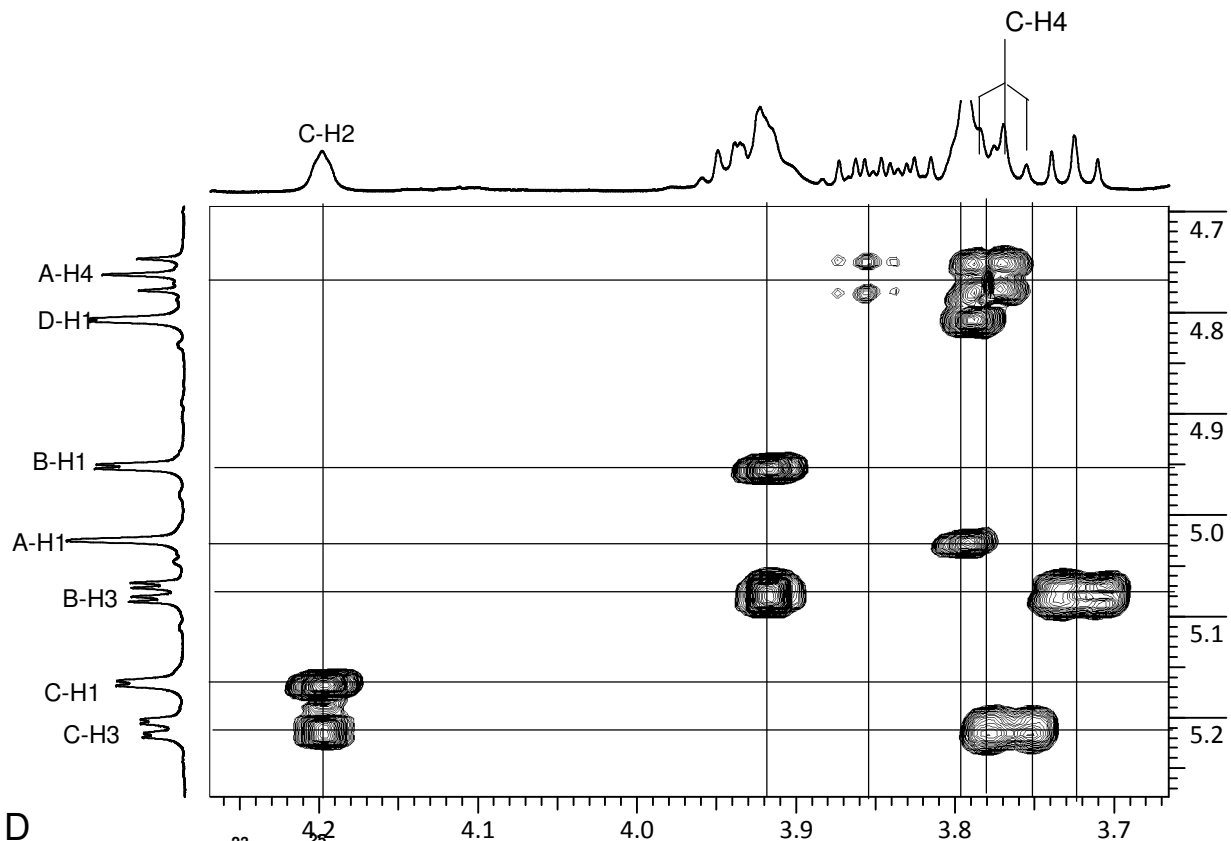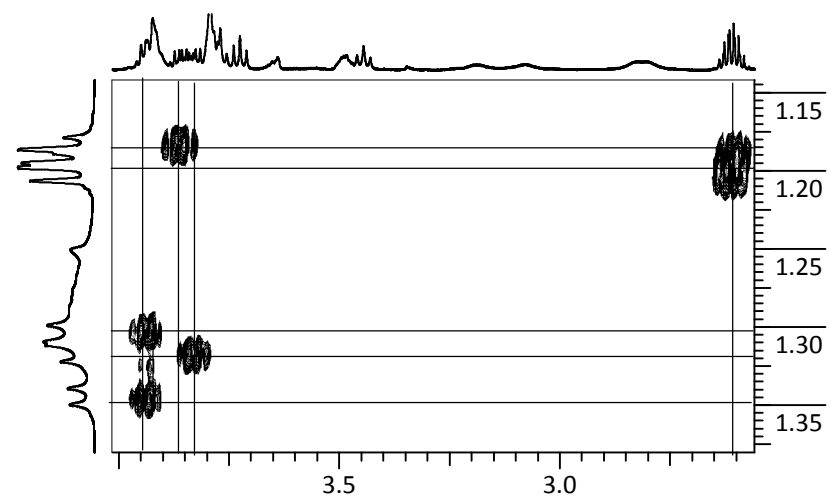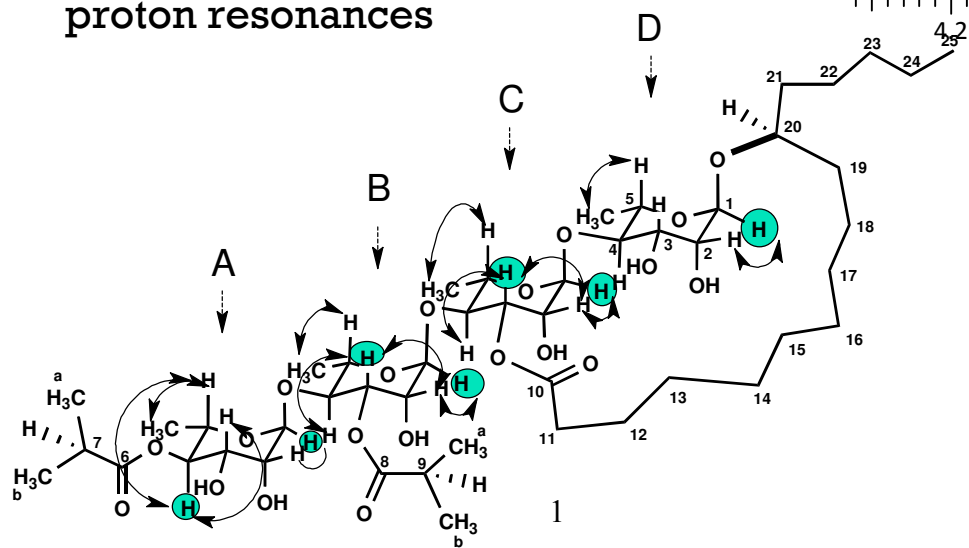

Expanded portion of the **NOESY** spectrum

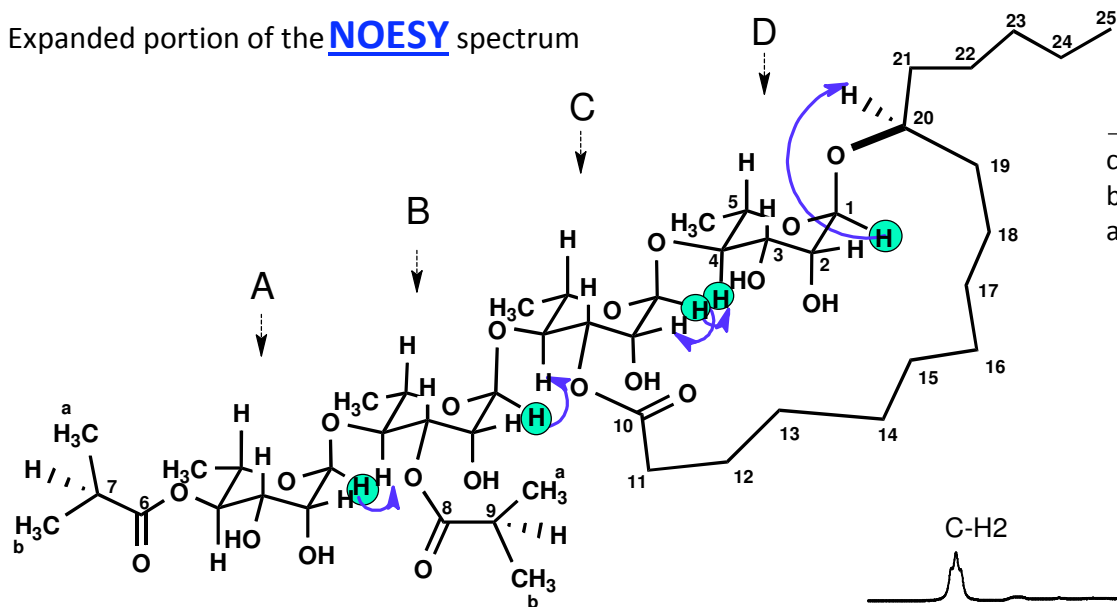

## Linkage confirmation between sugar moieties

cross peaks observed on the contour plot of the NOESY spectrum between A-H1 and B-H4; between B-H1 and C-H4; between C-H1 and D-H4 are shown by curved arrows

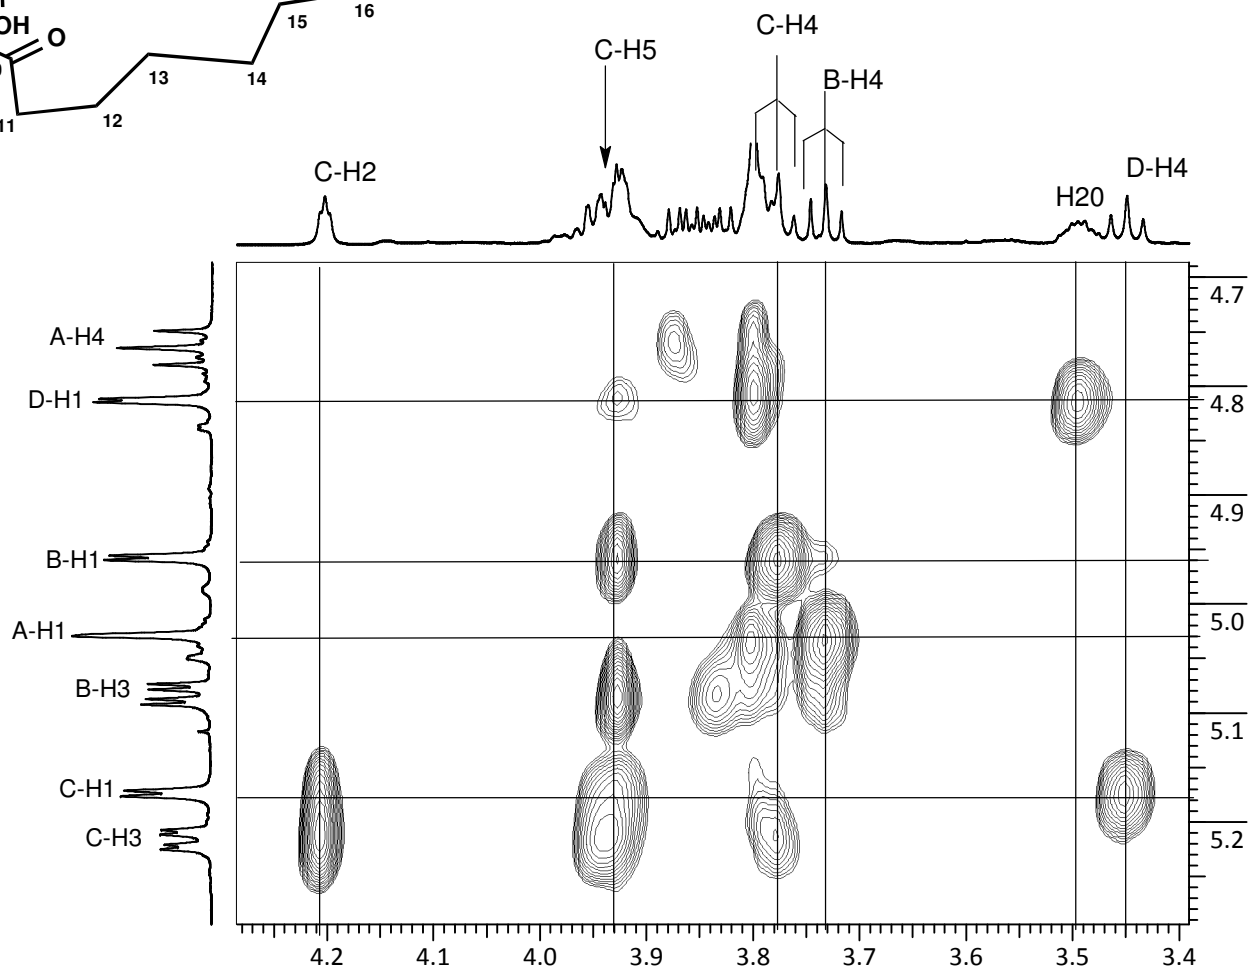

**Linkage confirmation between  
sugar moieties by NOESY  
correlations** (for synthetic 1)

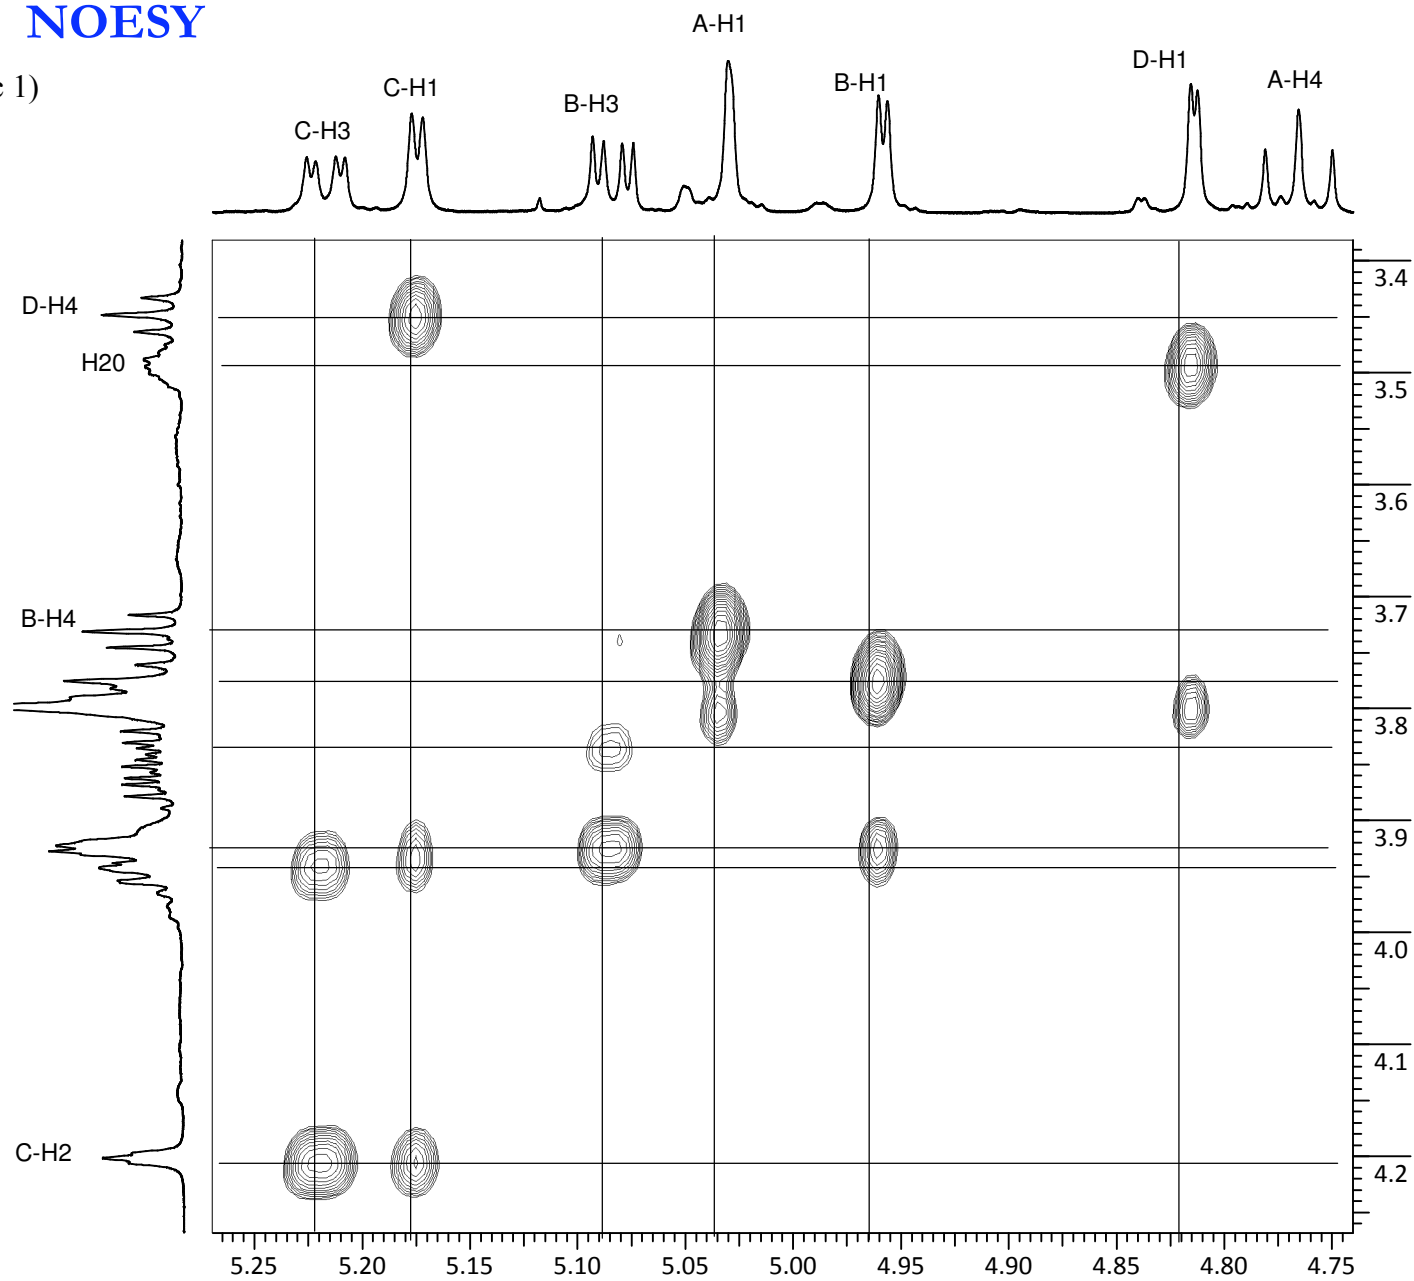

# NOESY spectrum

(for synthetic 1)

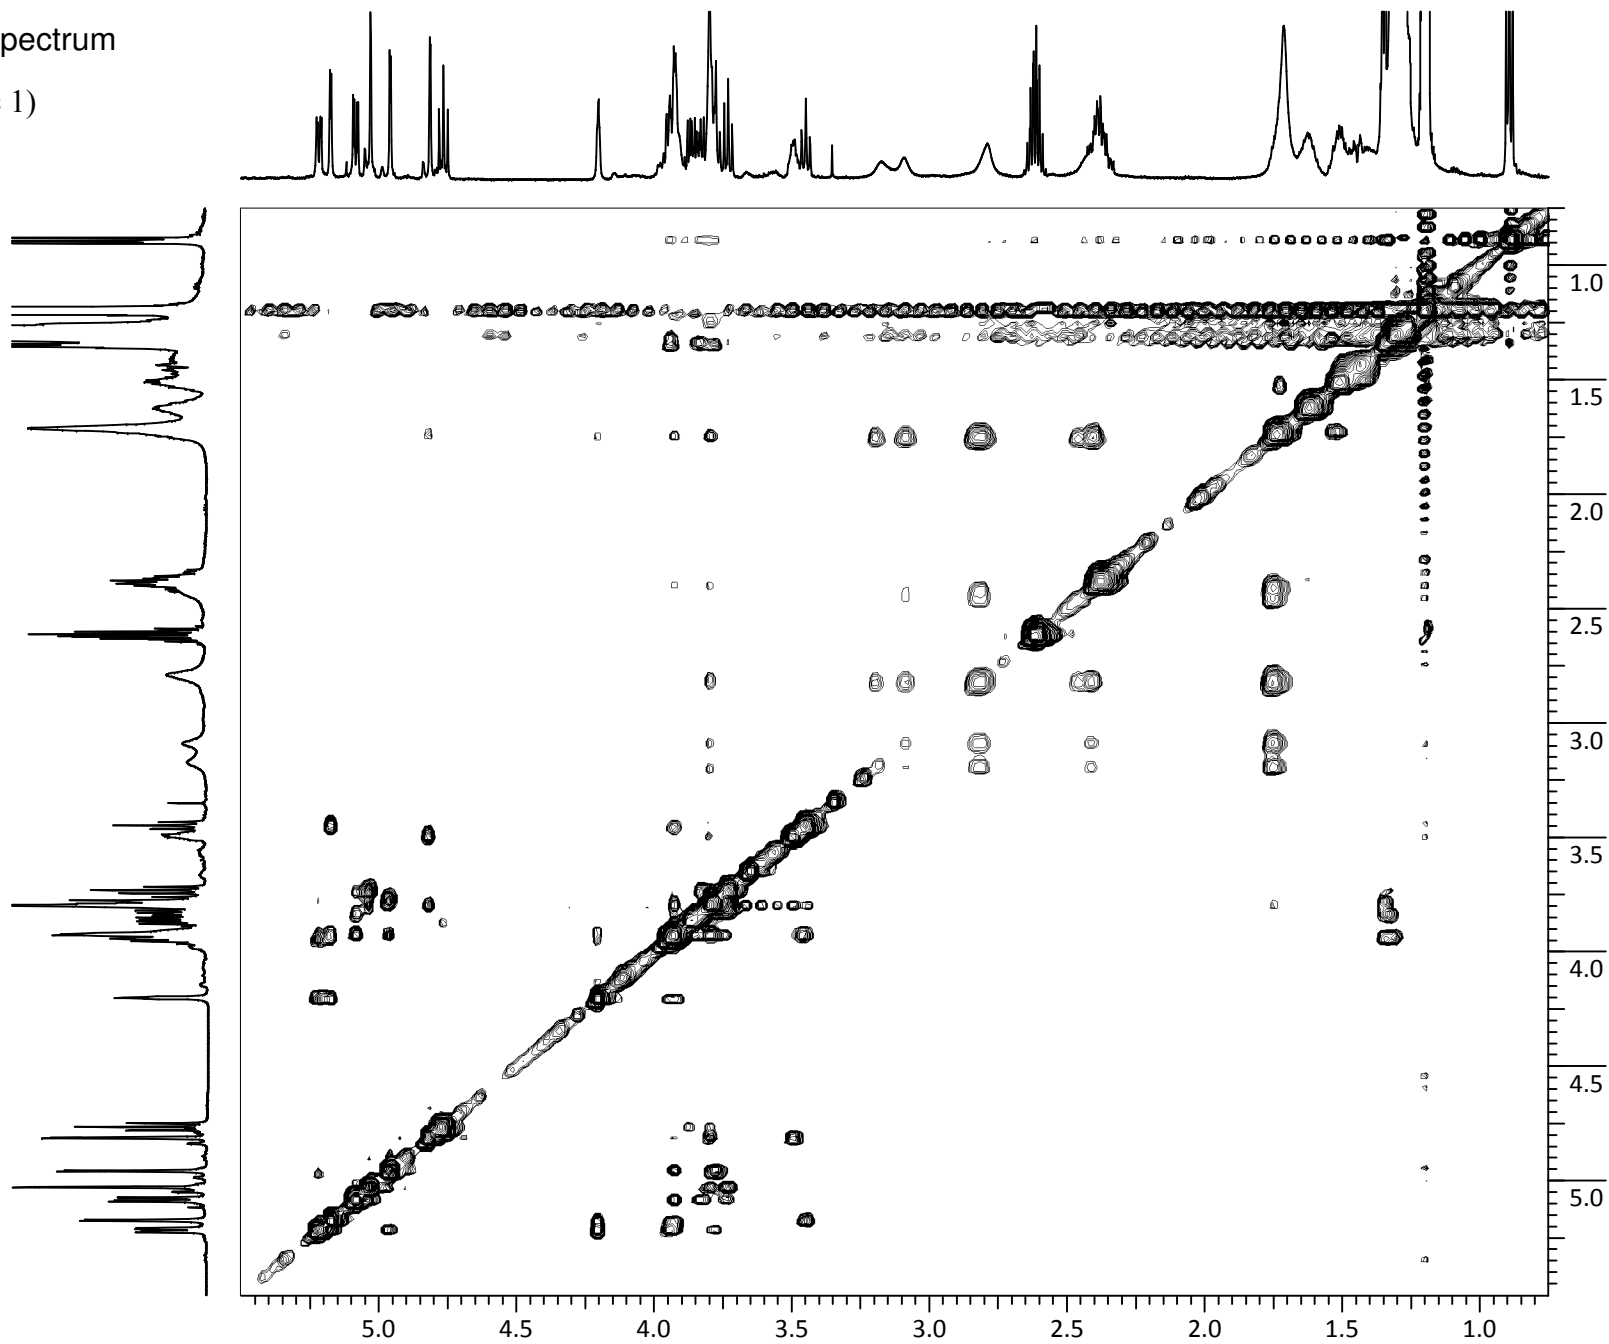

The linkage positions of the side chain ( $C_{16}H_{31}O_3$ ) and the substituents  $(CH_3)_2CHC(O)$  were confirmed by three bond HMBC correlations (see curved arrows)

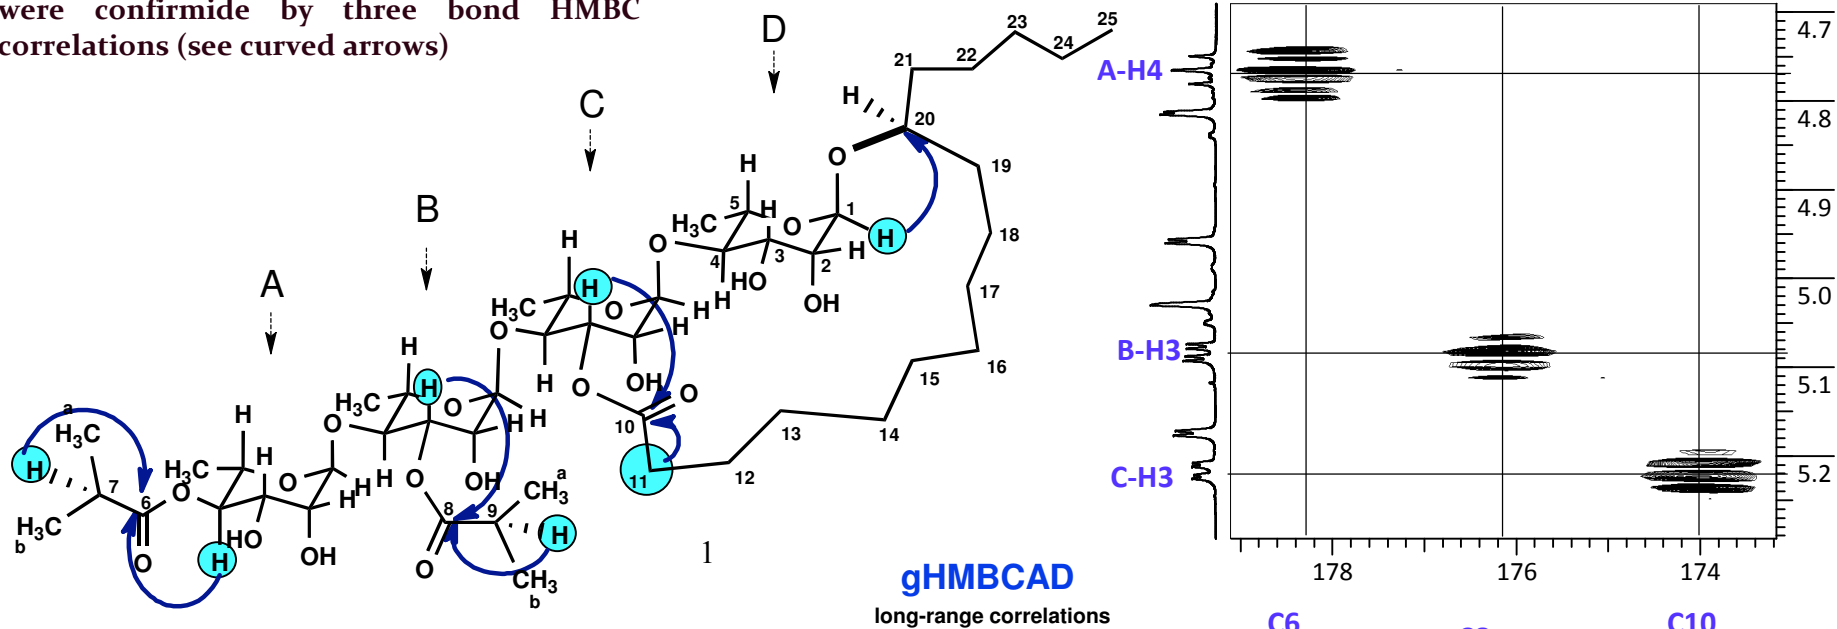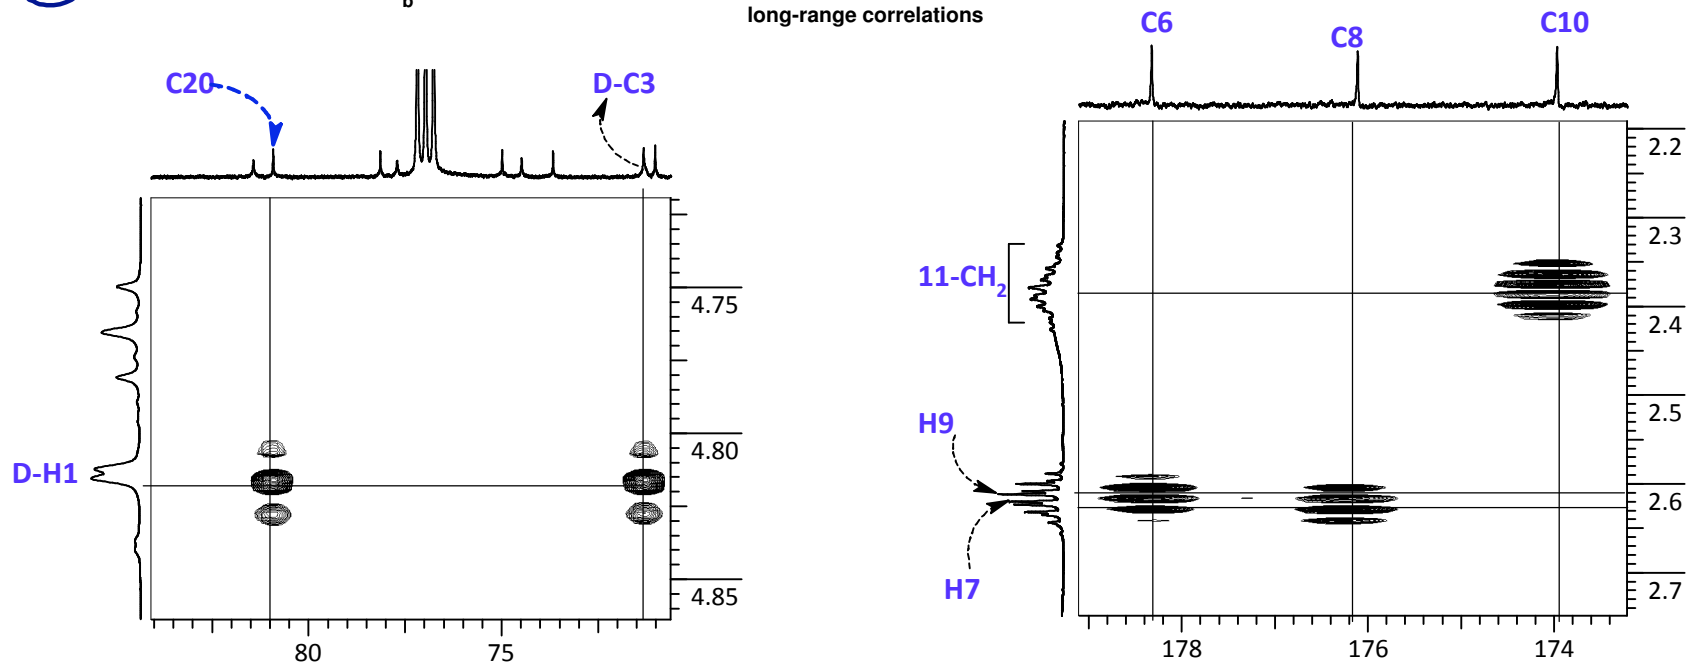



## The linkage positions of the sugar moieties (A-D)

were confirmed by three bond HMBC correlations (see curved arrows)

**gHSQCAD**  
one-bond correlations

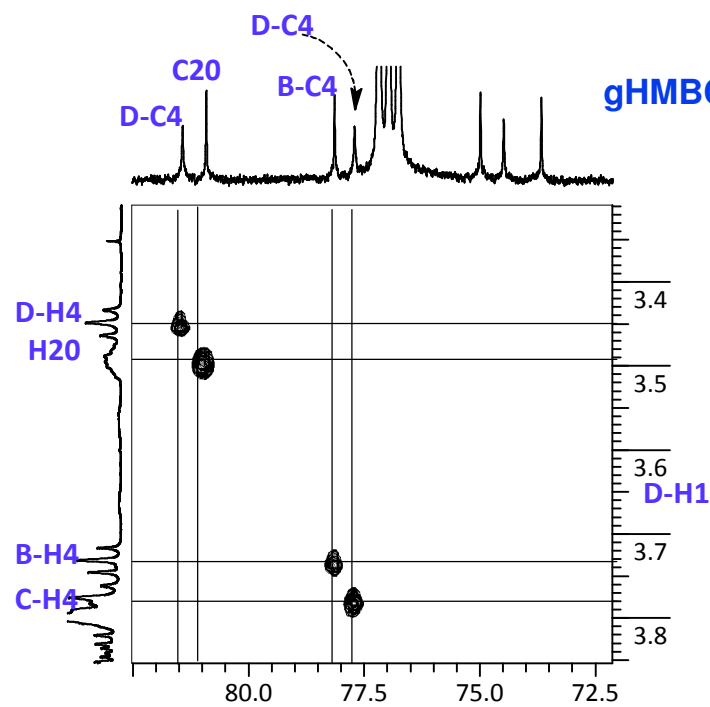

**gHMBCAD**

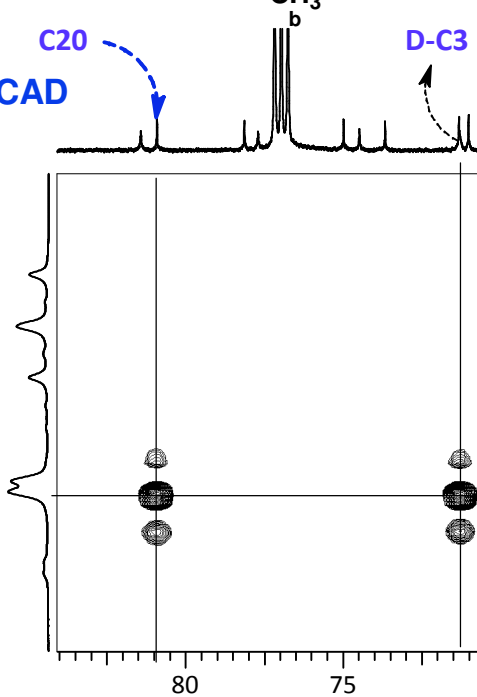

**gHMBCAD**

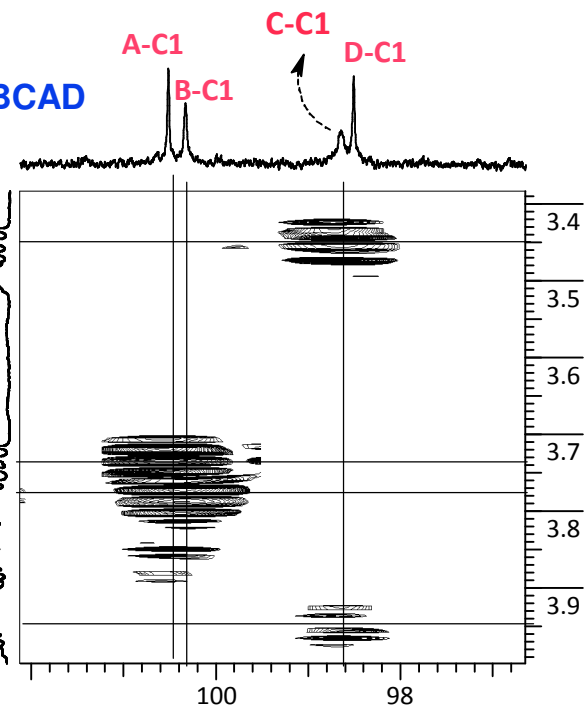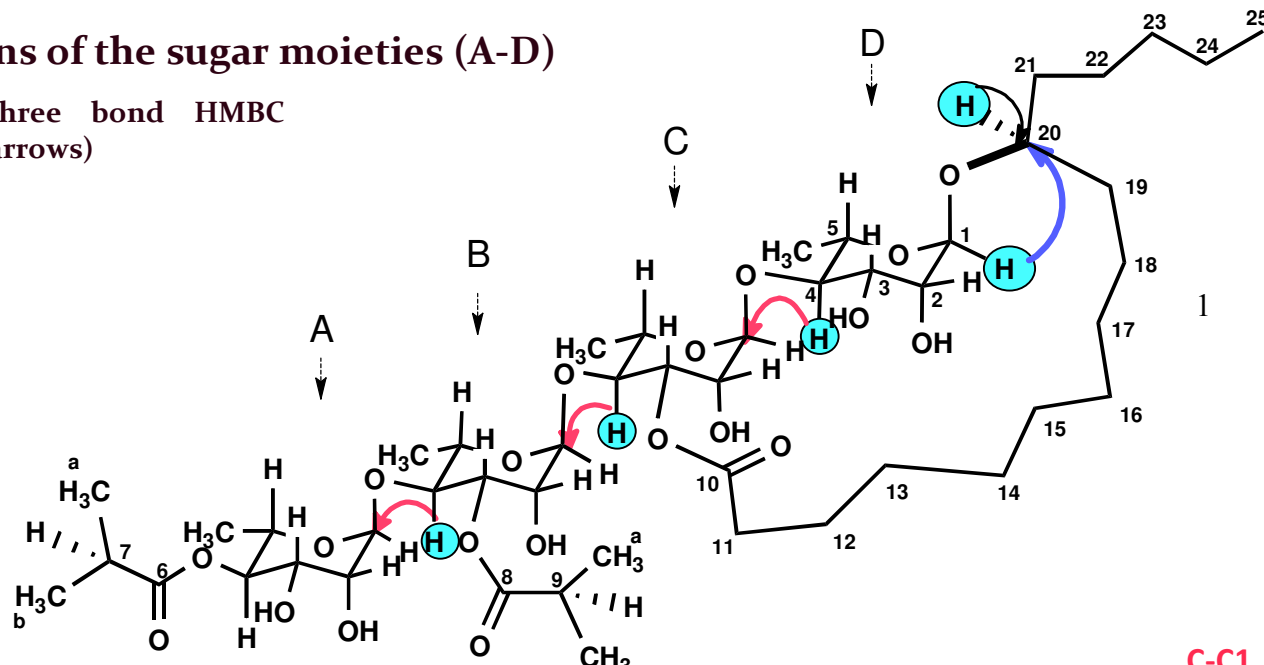

The linkage positions of the sugar moieties (A-D)

were confirmed by three bond HMBC correlations (see curved arrows)

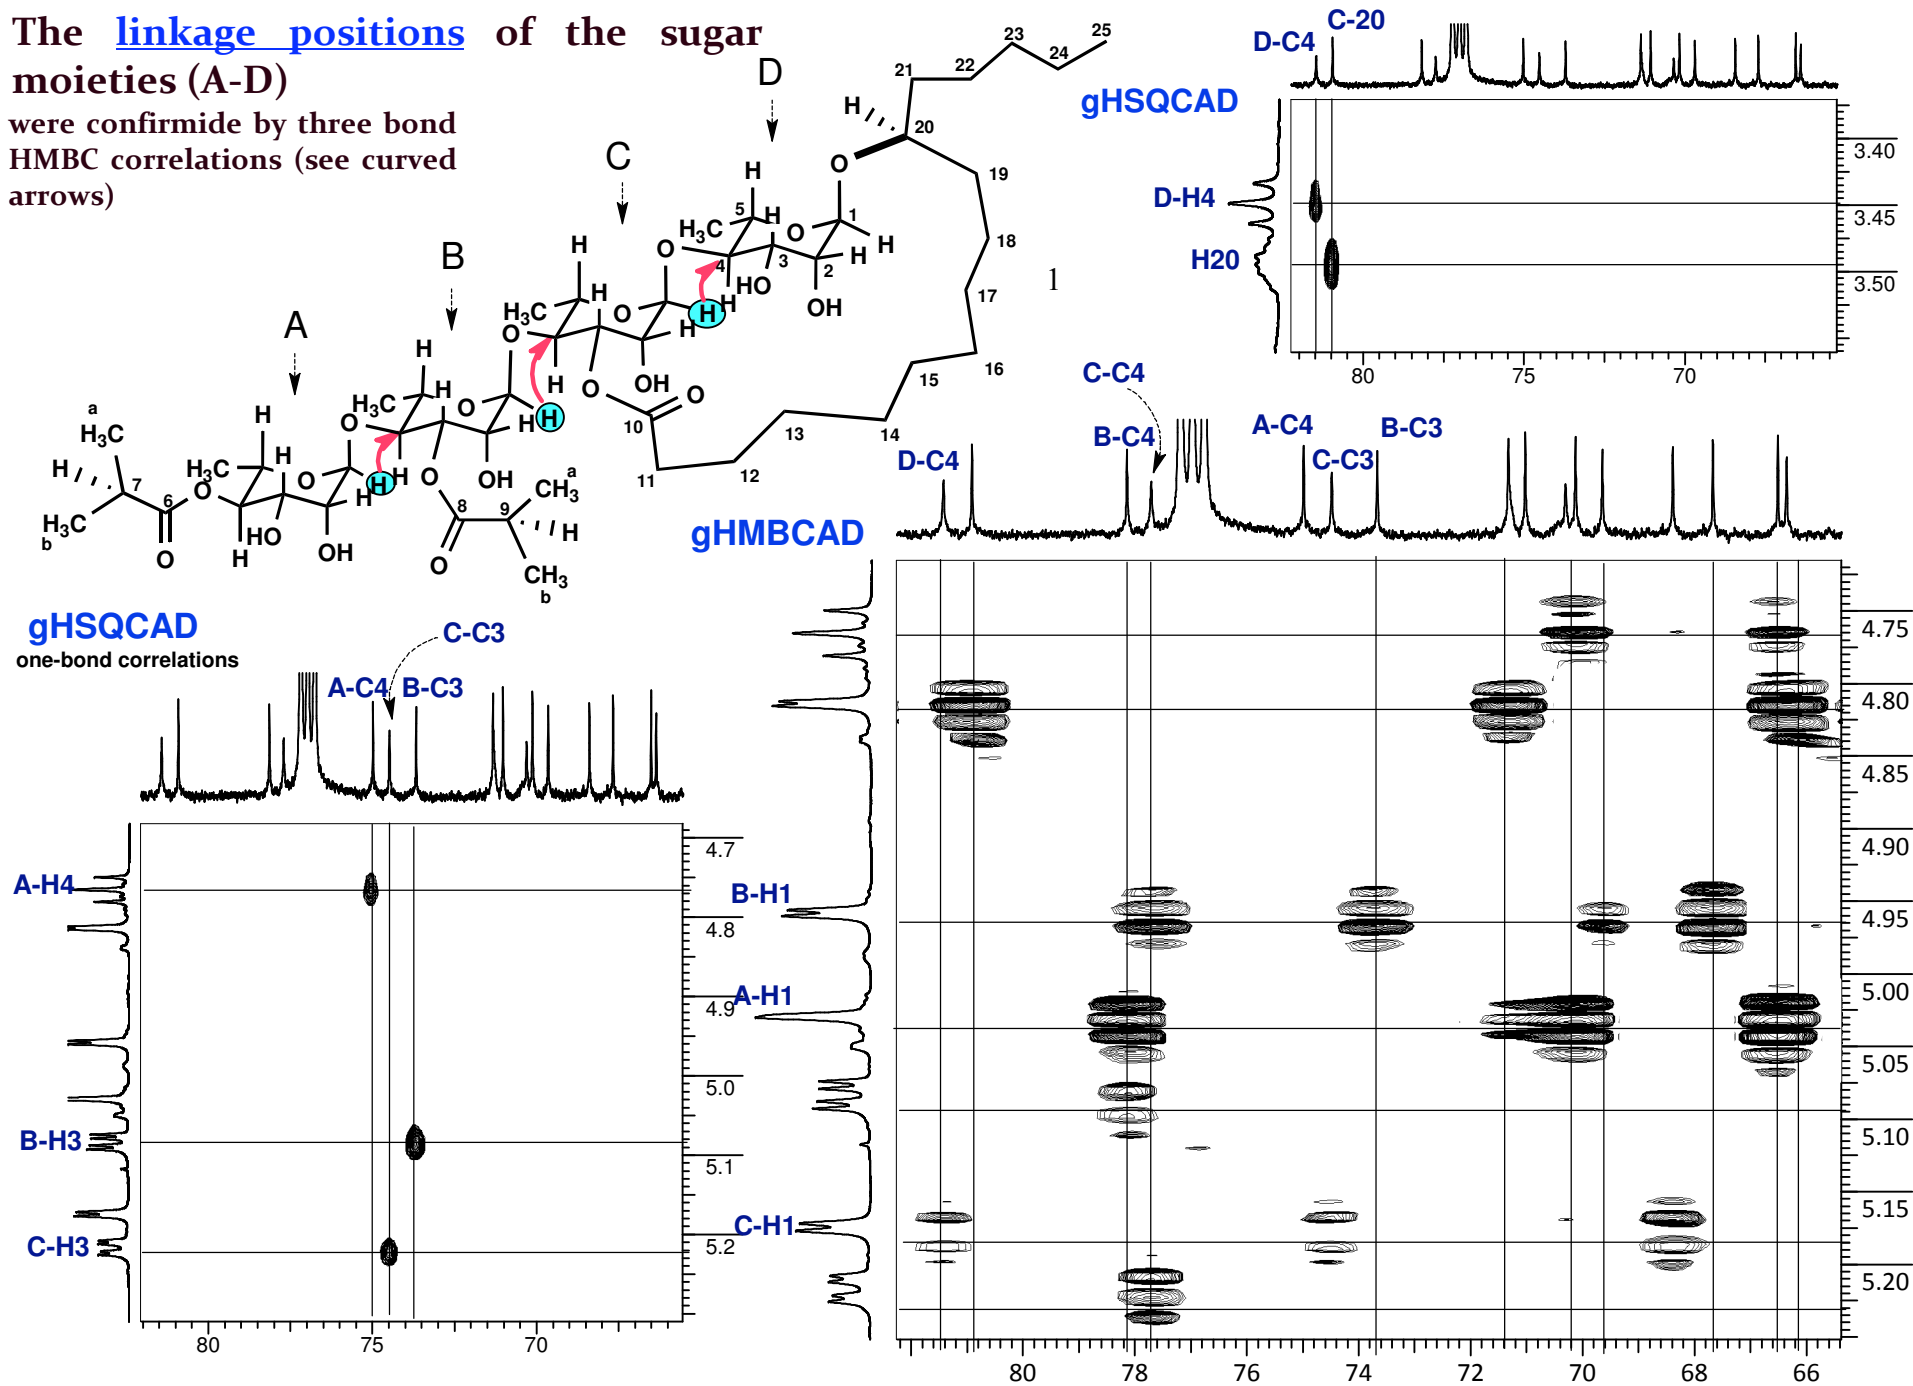

# Expanded portion of the gHMBCAD spectrum

(for synthetic 1)

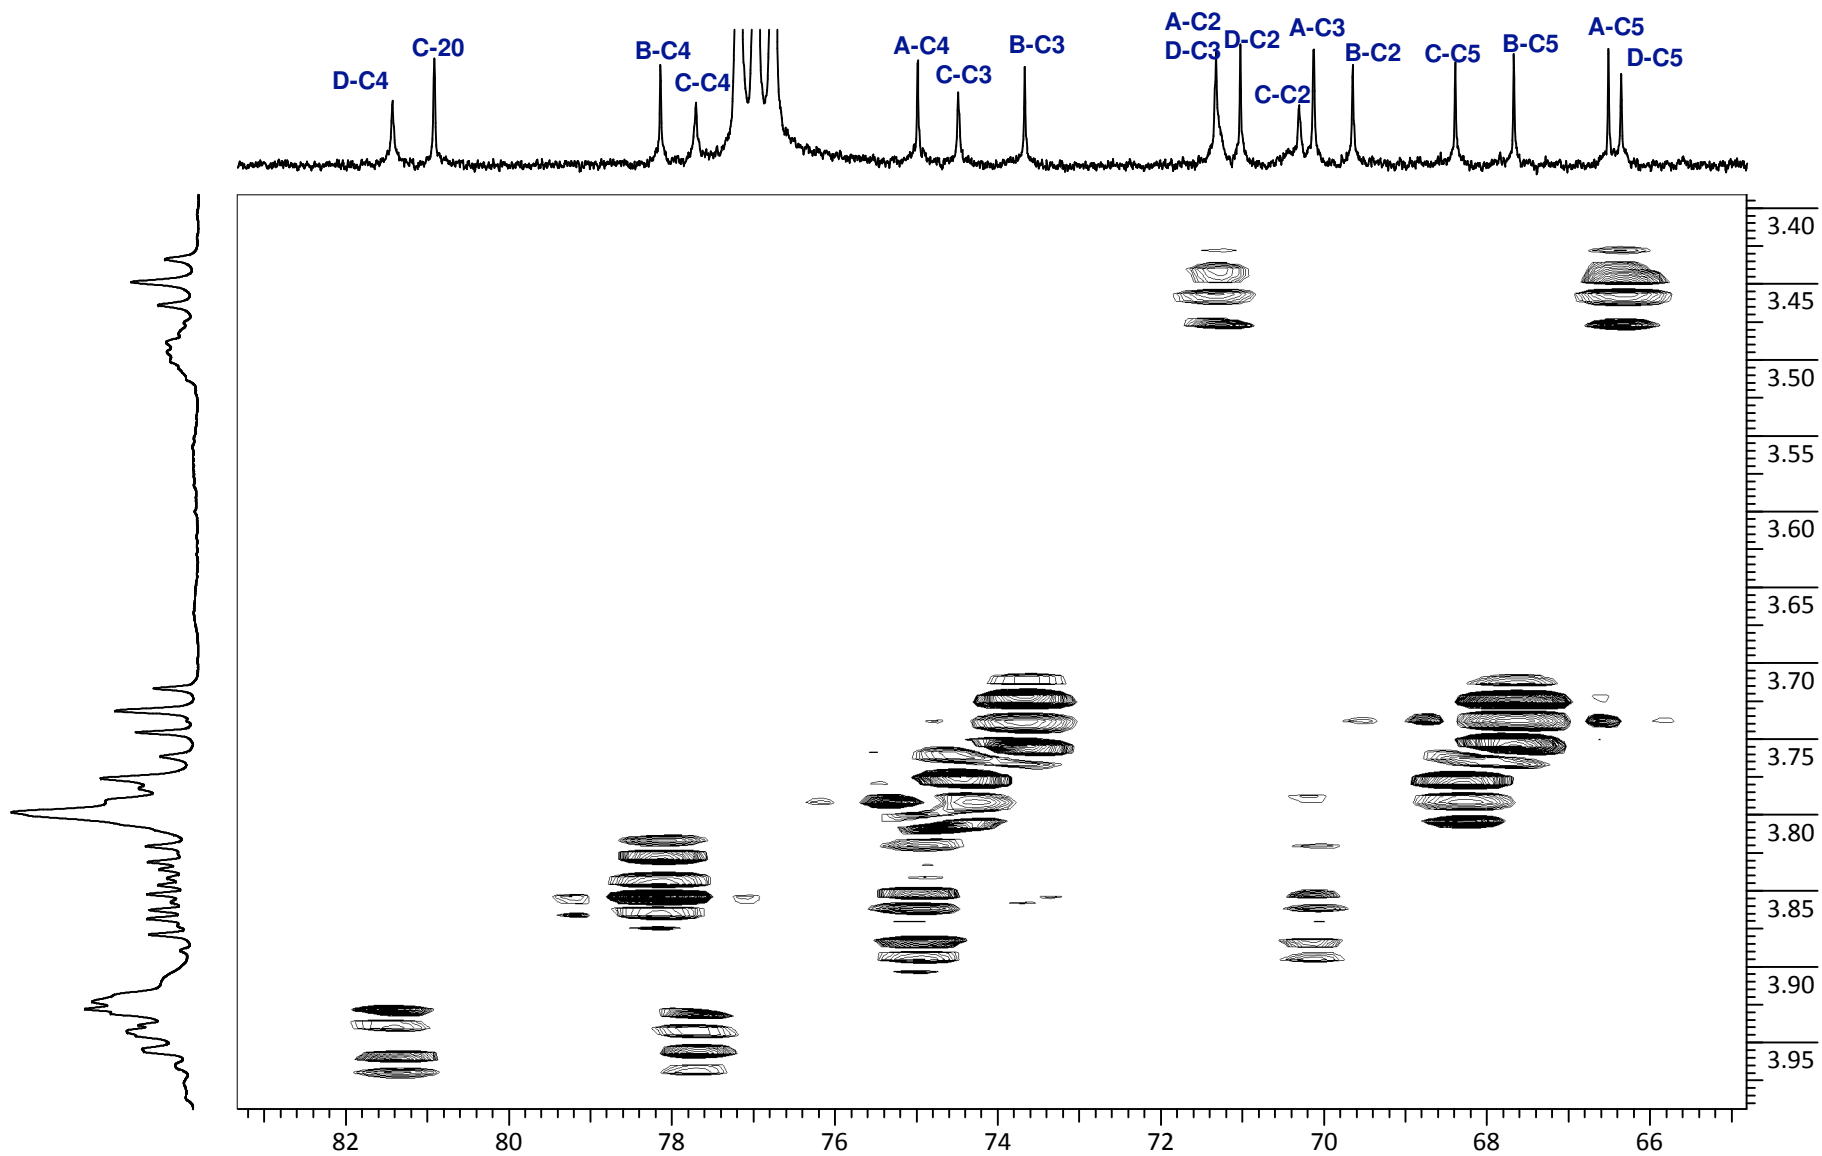

Observed two and three bond HMBC correlations between CH<sub>3</sub>'s of each ring moiety (A-D) and C4/C5 carbon resonances

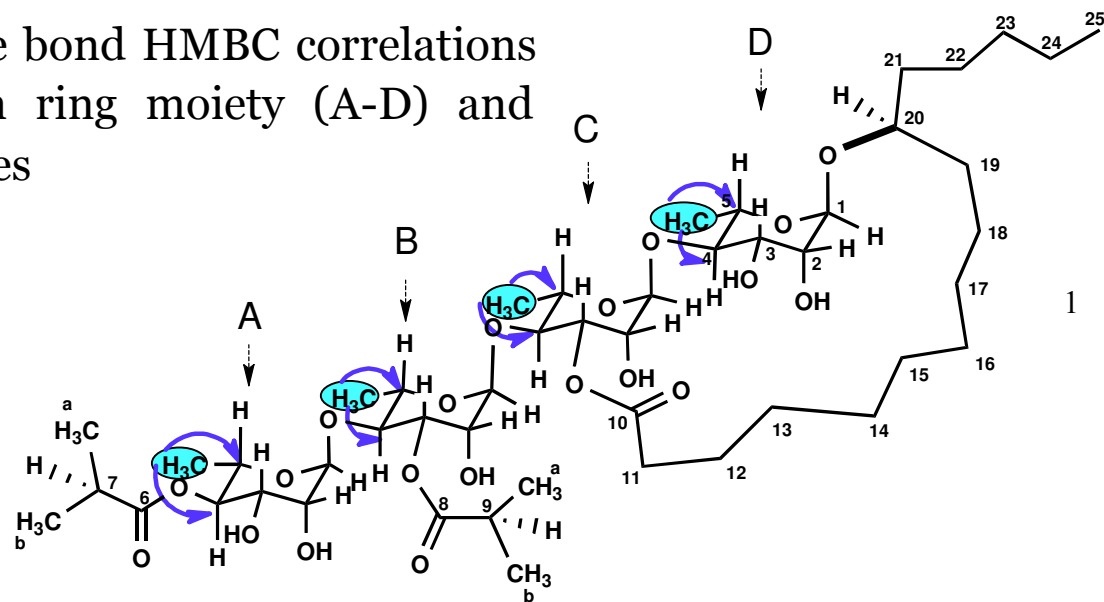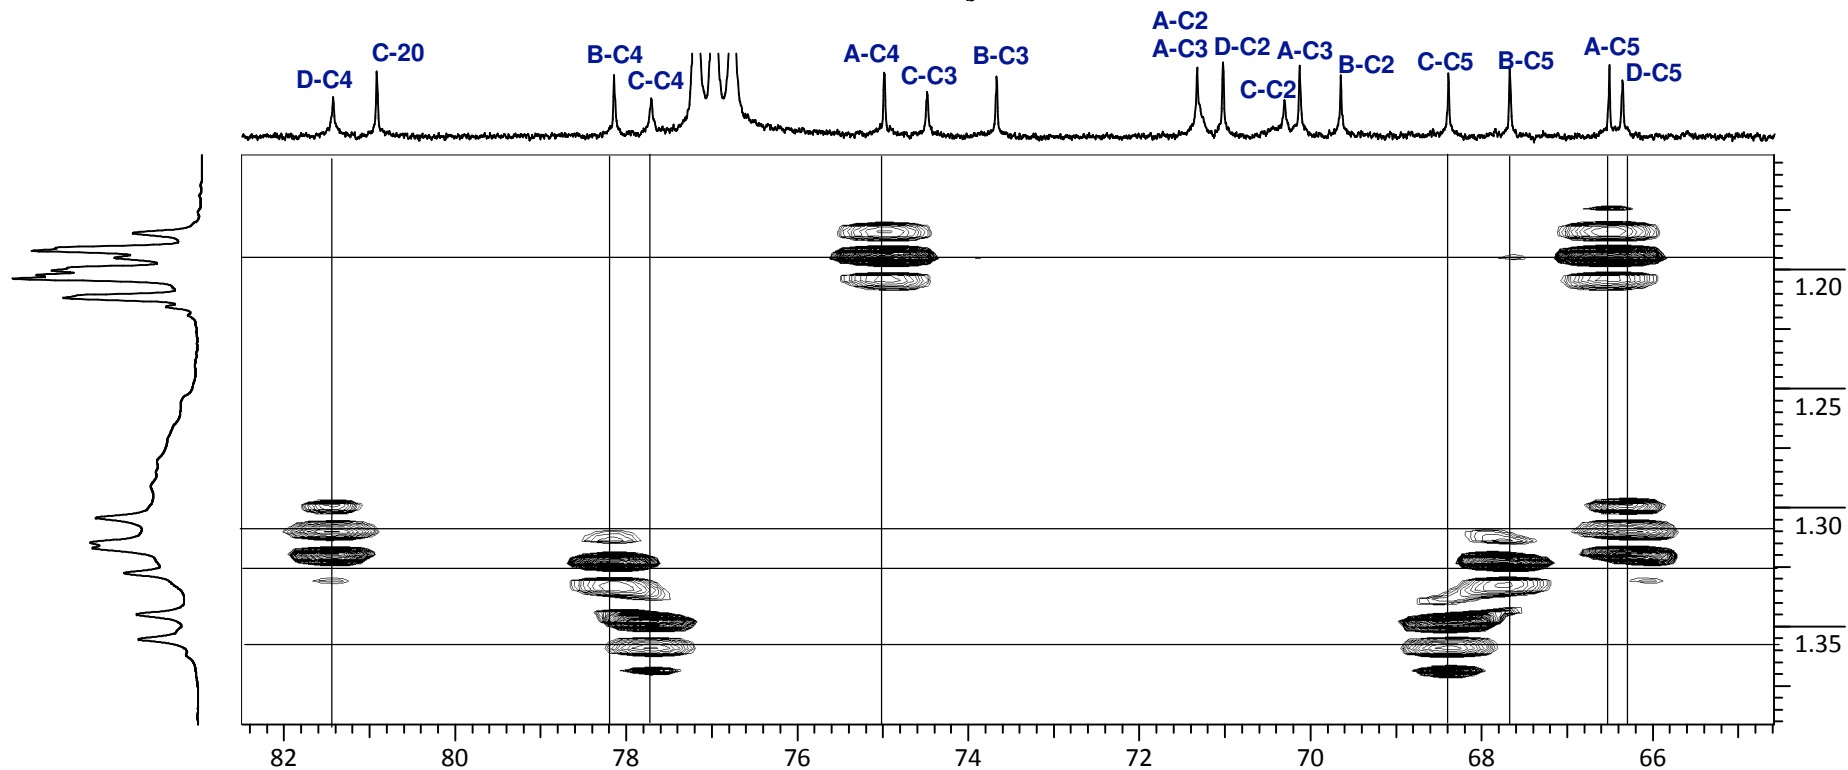

# Expanded portions of the gHMBCAD spectrum

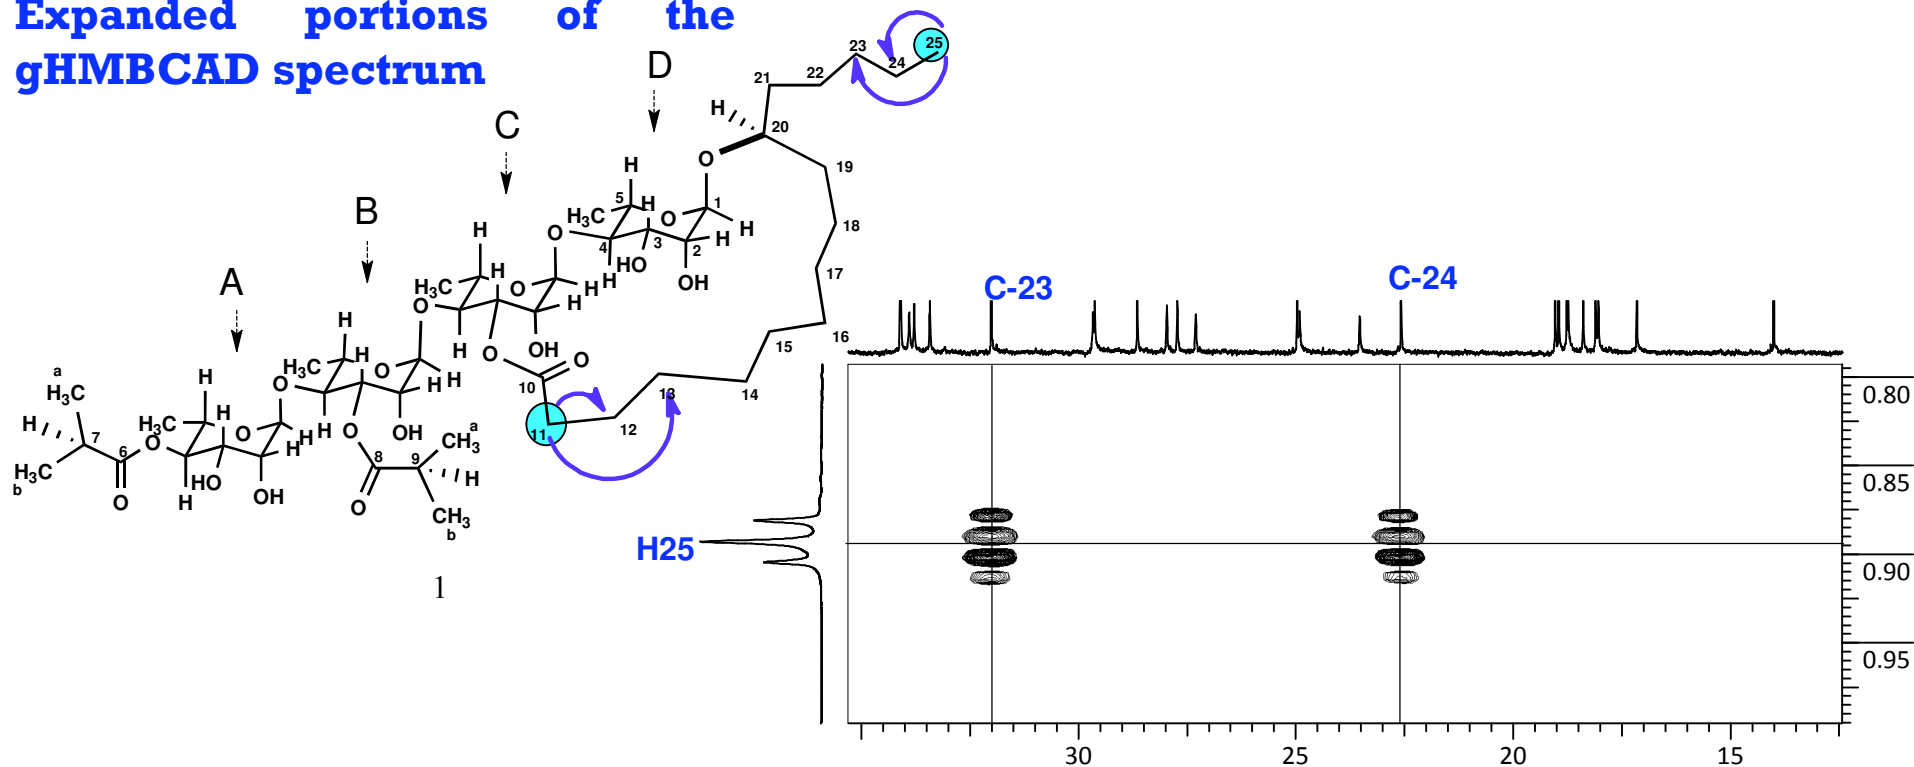

## gH<sub>2</sub>BCAD

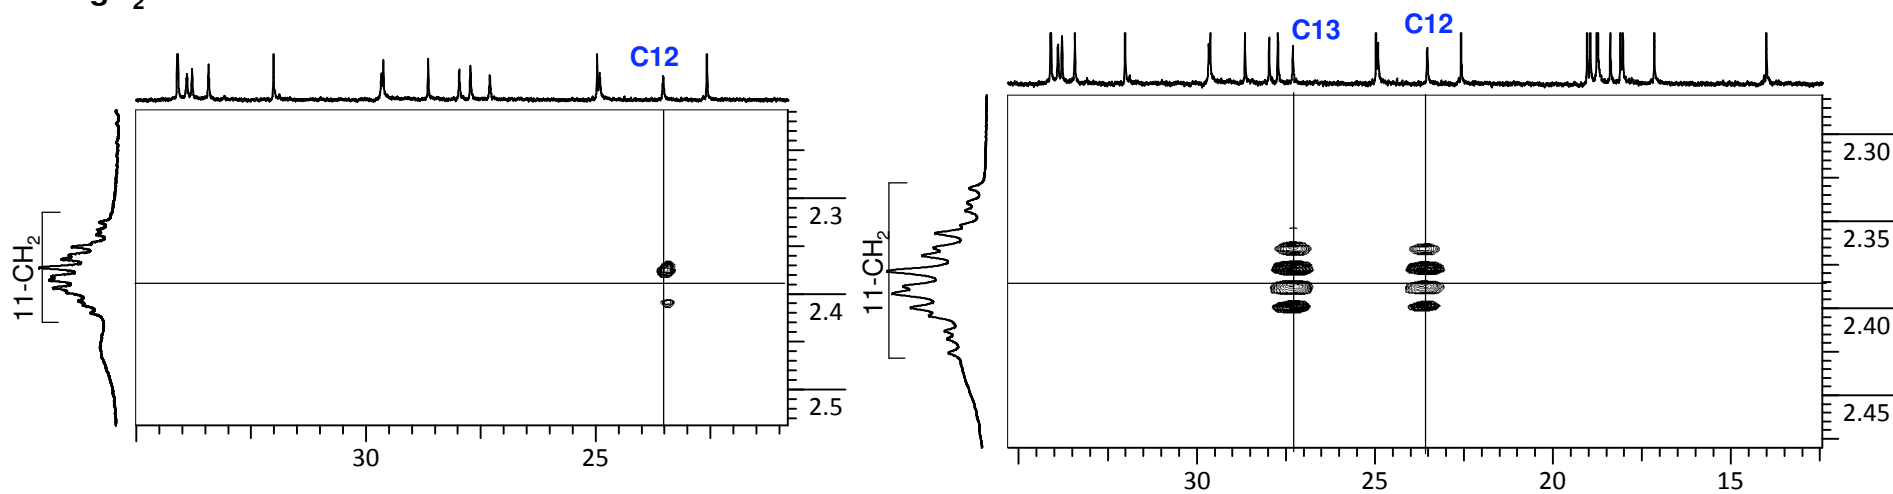

# Expanded portions of the gH2BCAD spectrum

Observed two bond ( $^2J_{HC}$ ) correlations

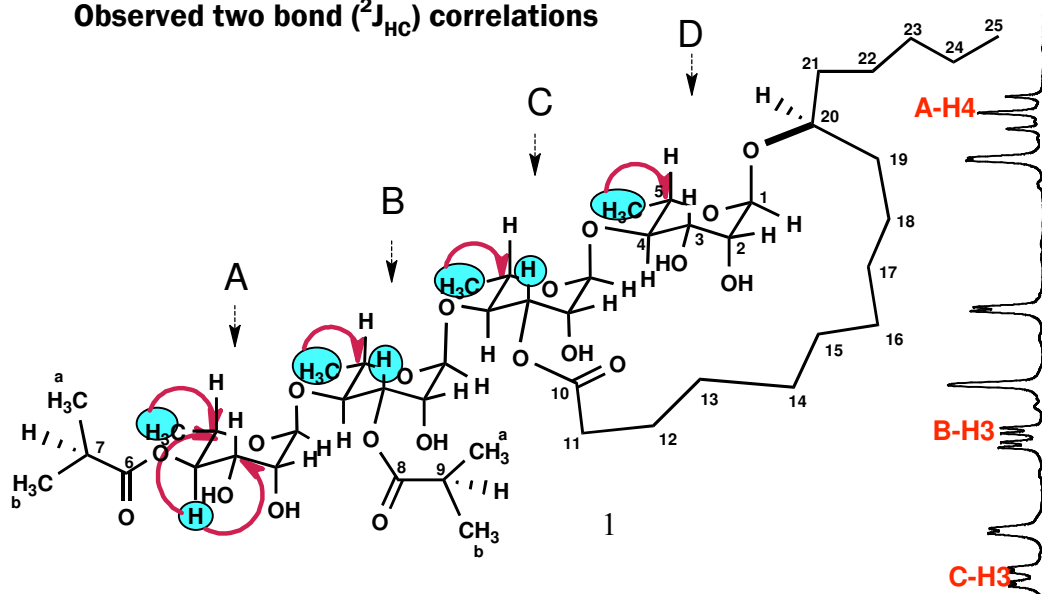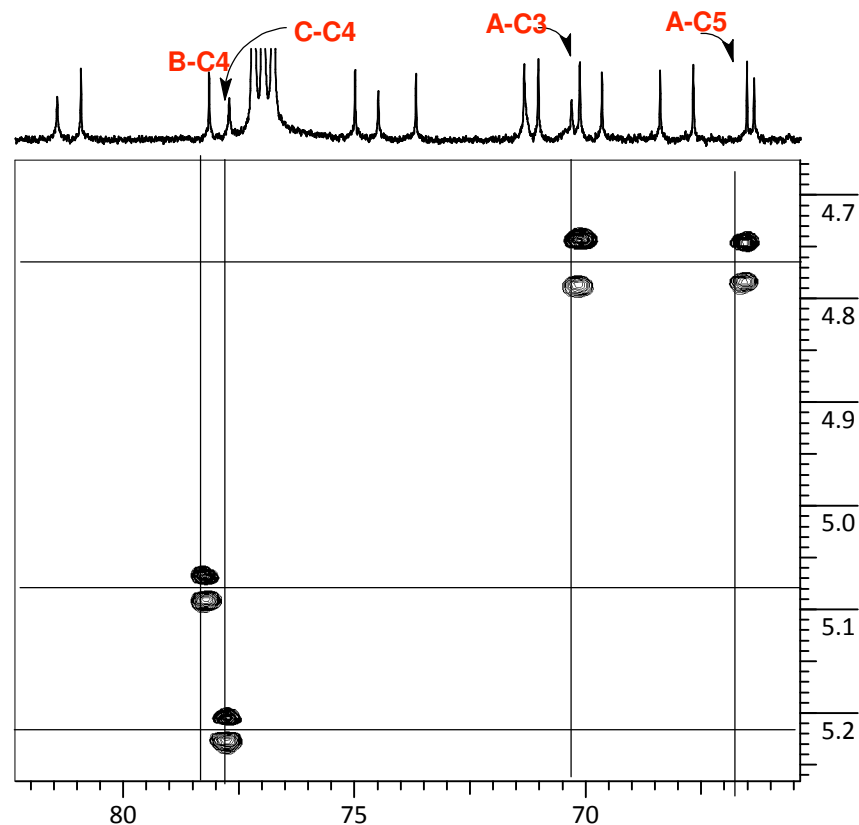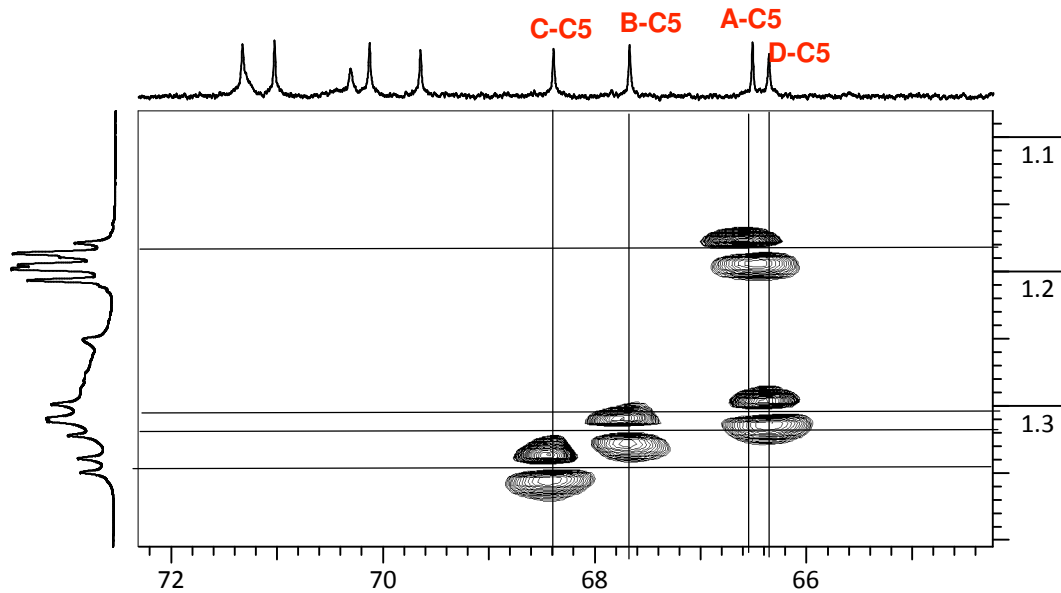

# gHSQCAD

expansion

(for synthetic 1)

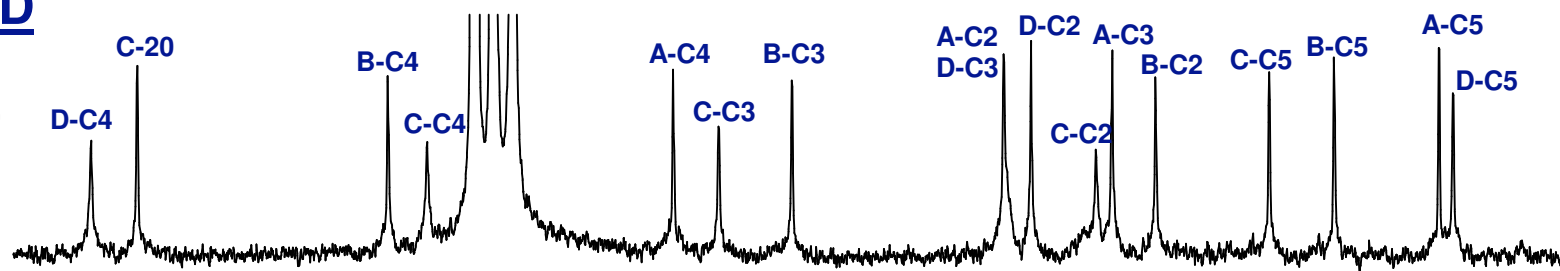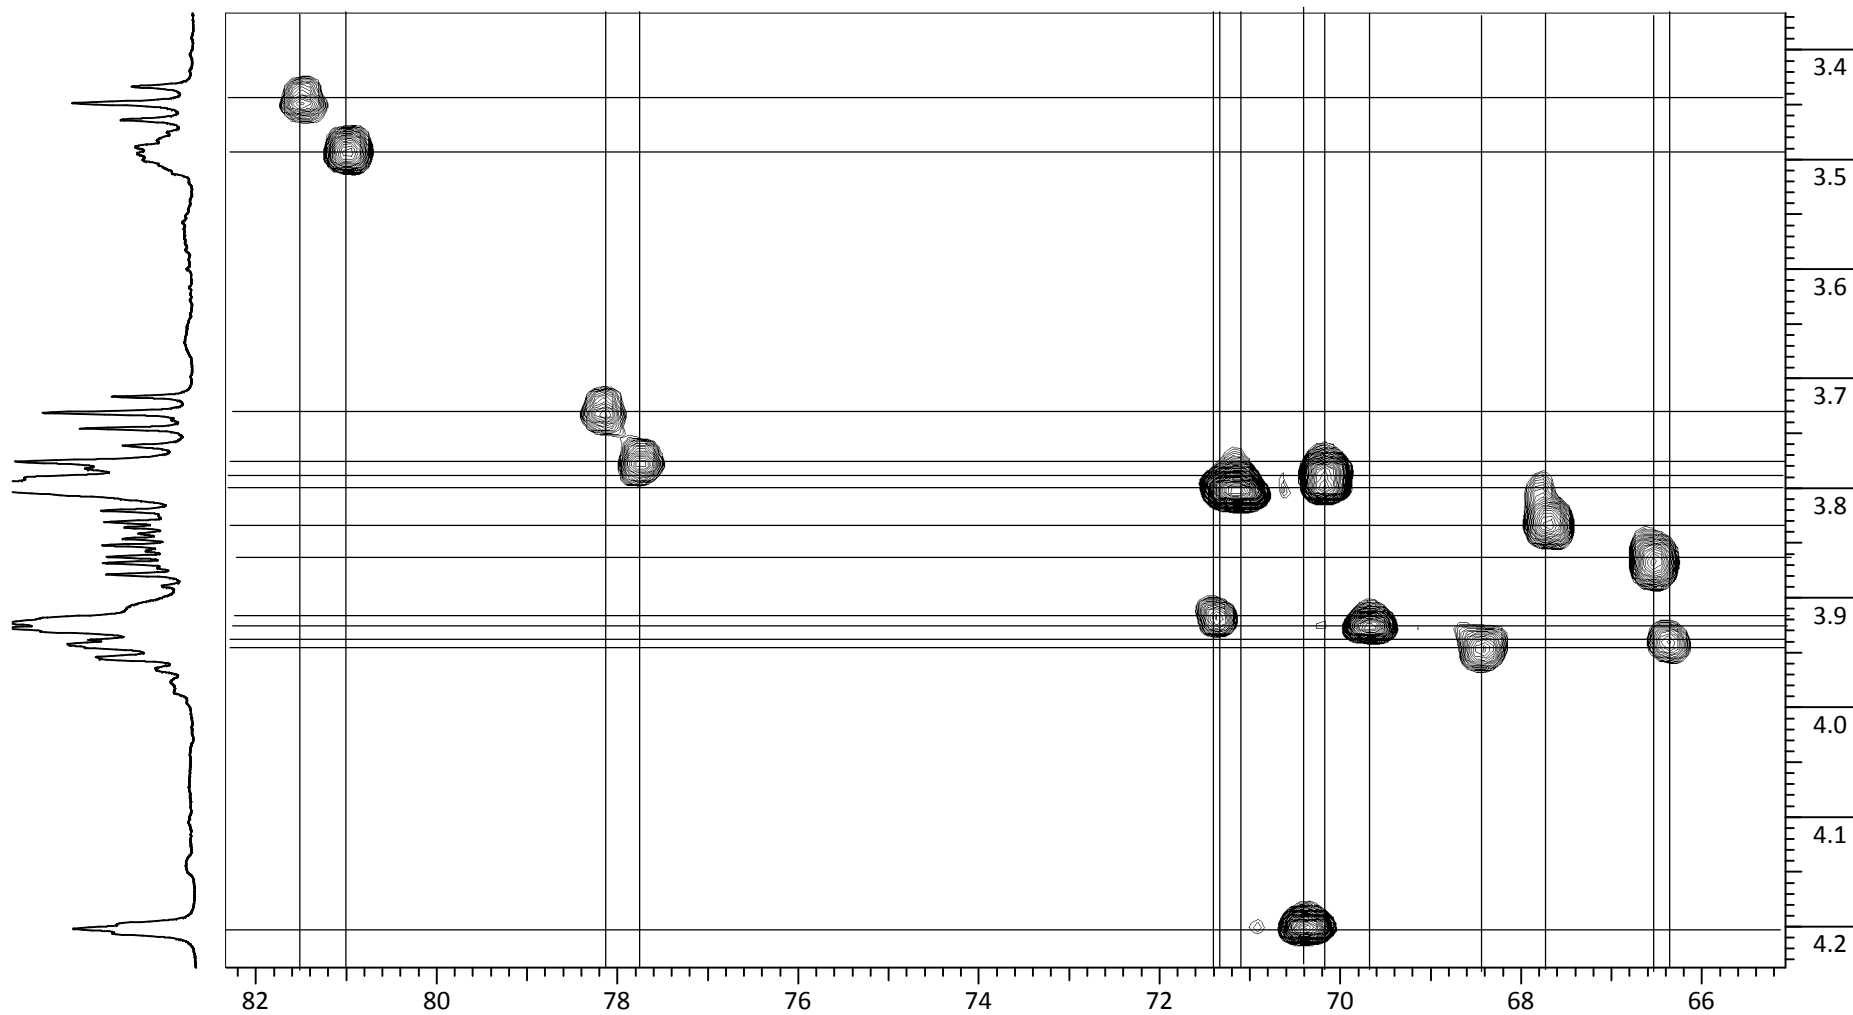

**$^1\text{H}$  NMR spectrum in Pyridine- $d_5$   
600 MHz**

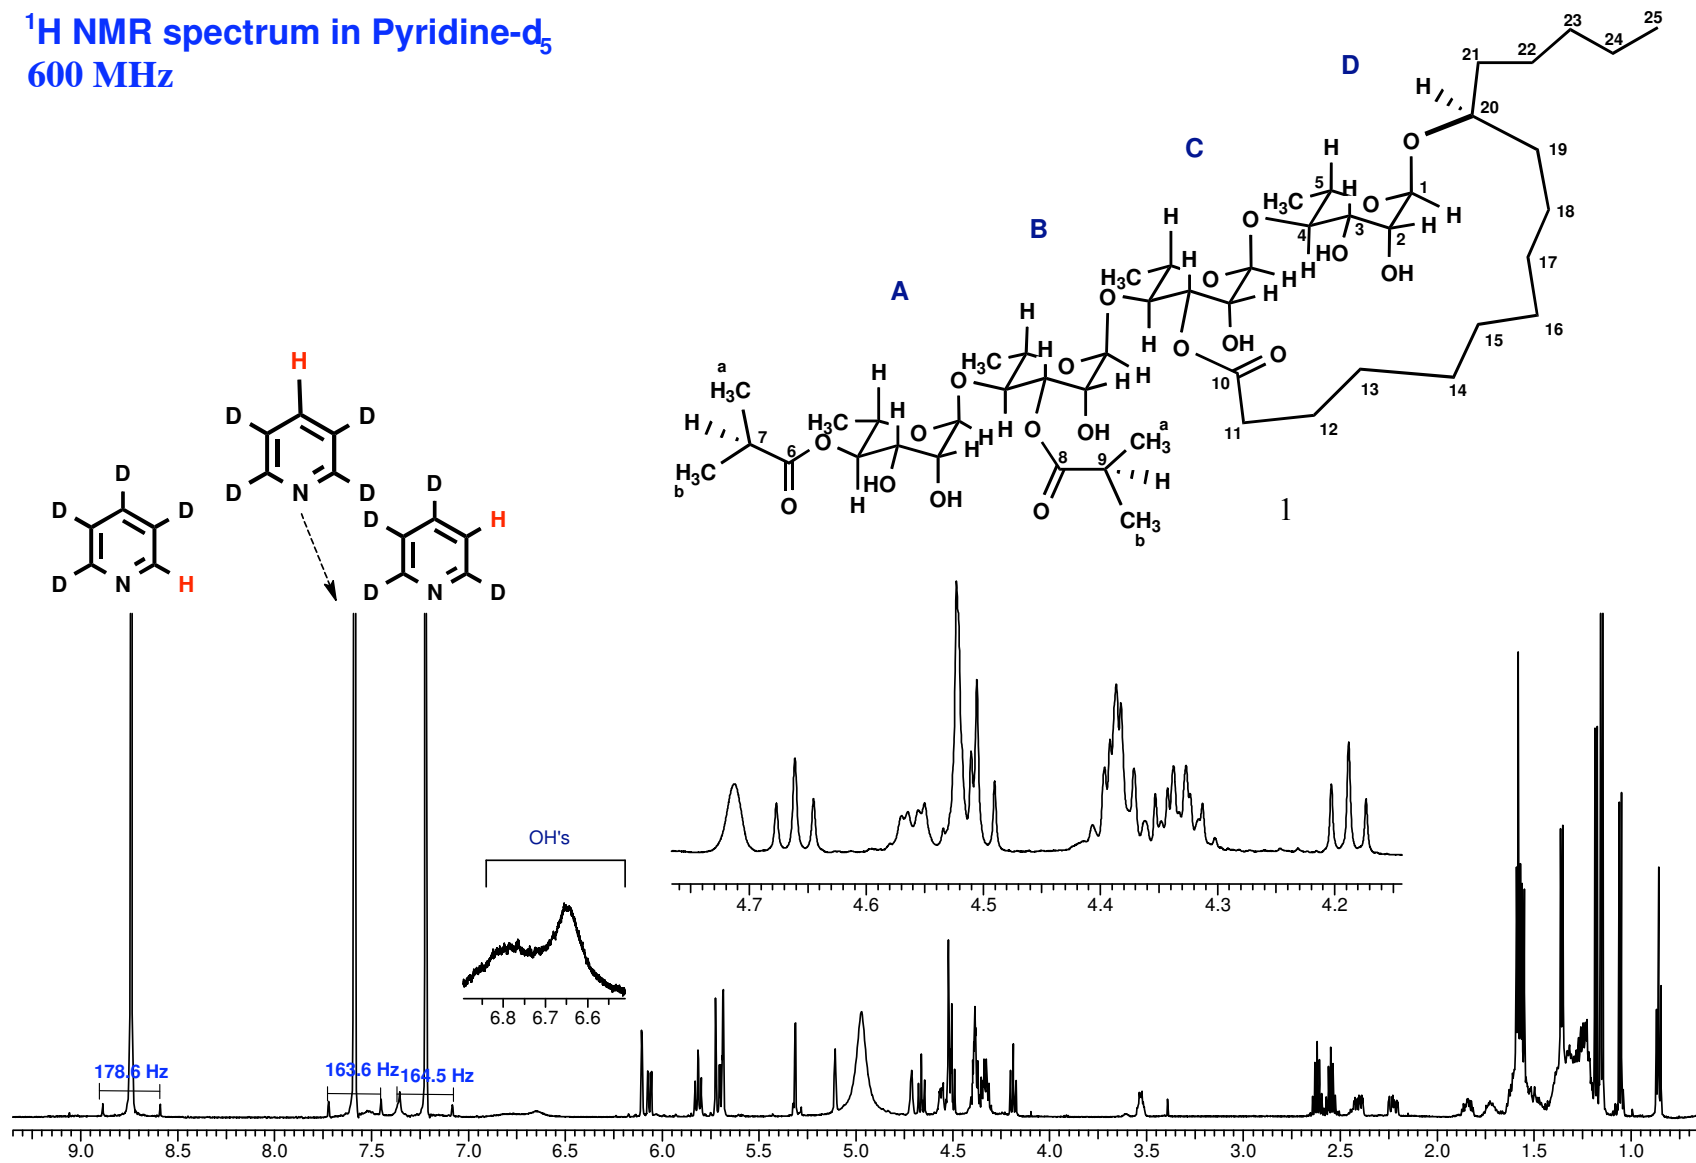



Selective excitation of 5-CH<sub>3</sub> at 1.36 ppm gave proton-proton connectivities for the **sugar moiety A**

1D TOCSY subspectrum (b);  
Control <sup>1</sup>H NMR spectrum (a)

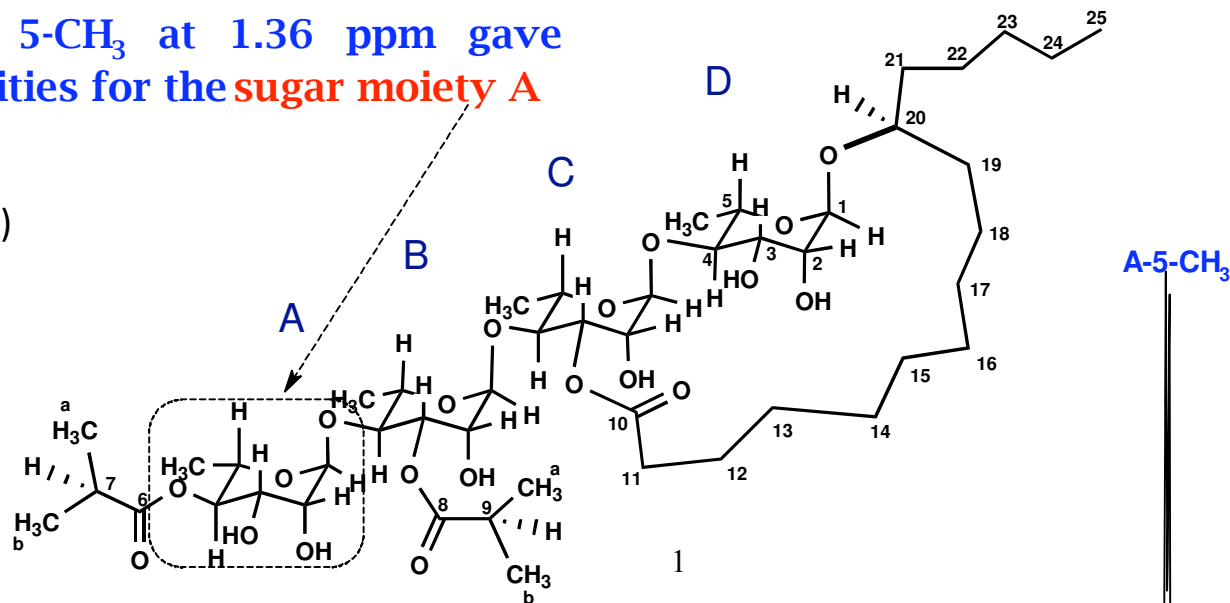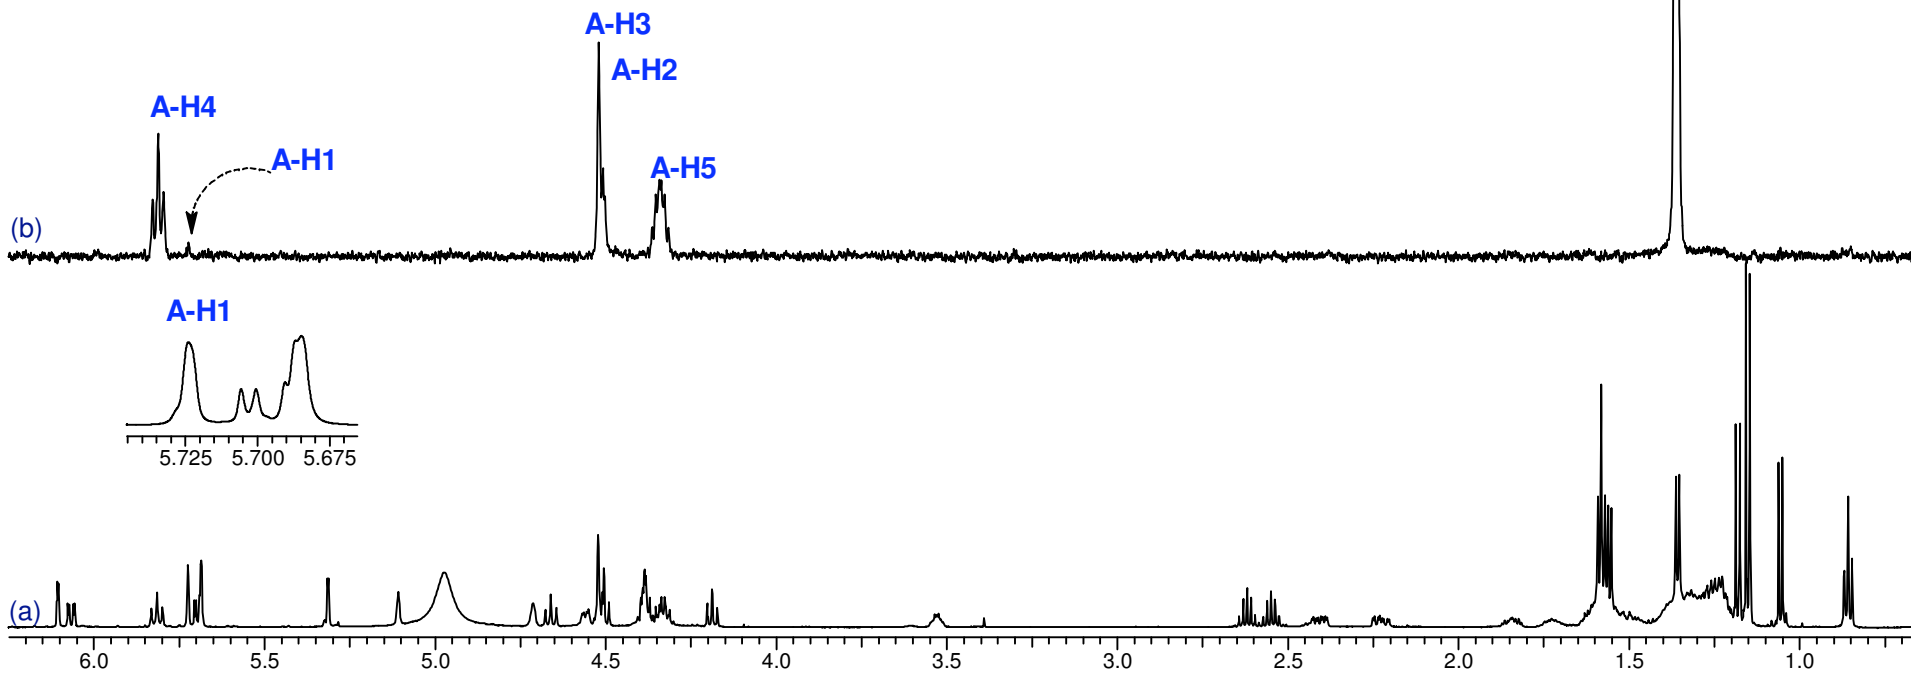

# Spin system identification for the sugar moiety B

## 1D TOCSY subspectrum (a)

Selective excitation of signals ( B-H1 and B-H3)

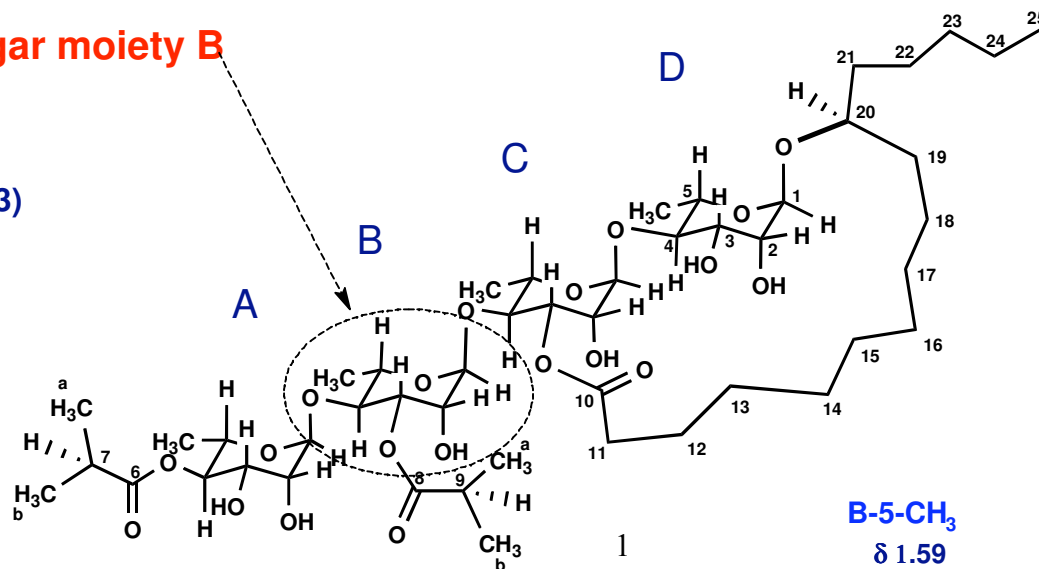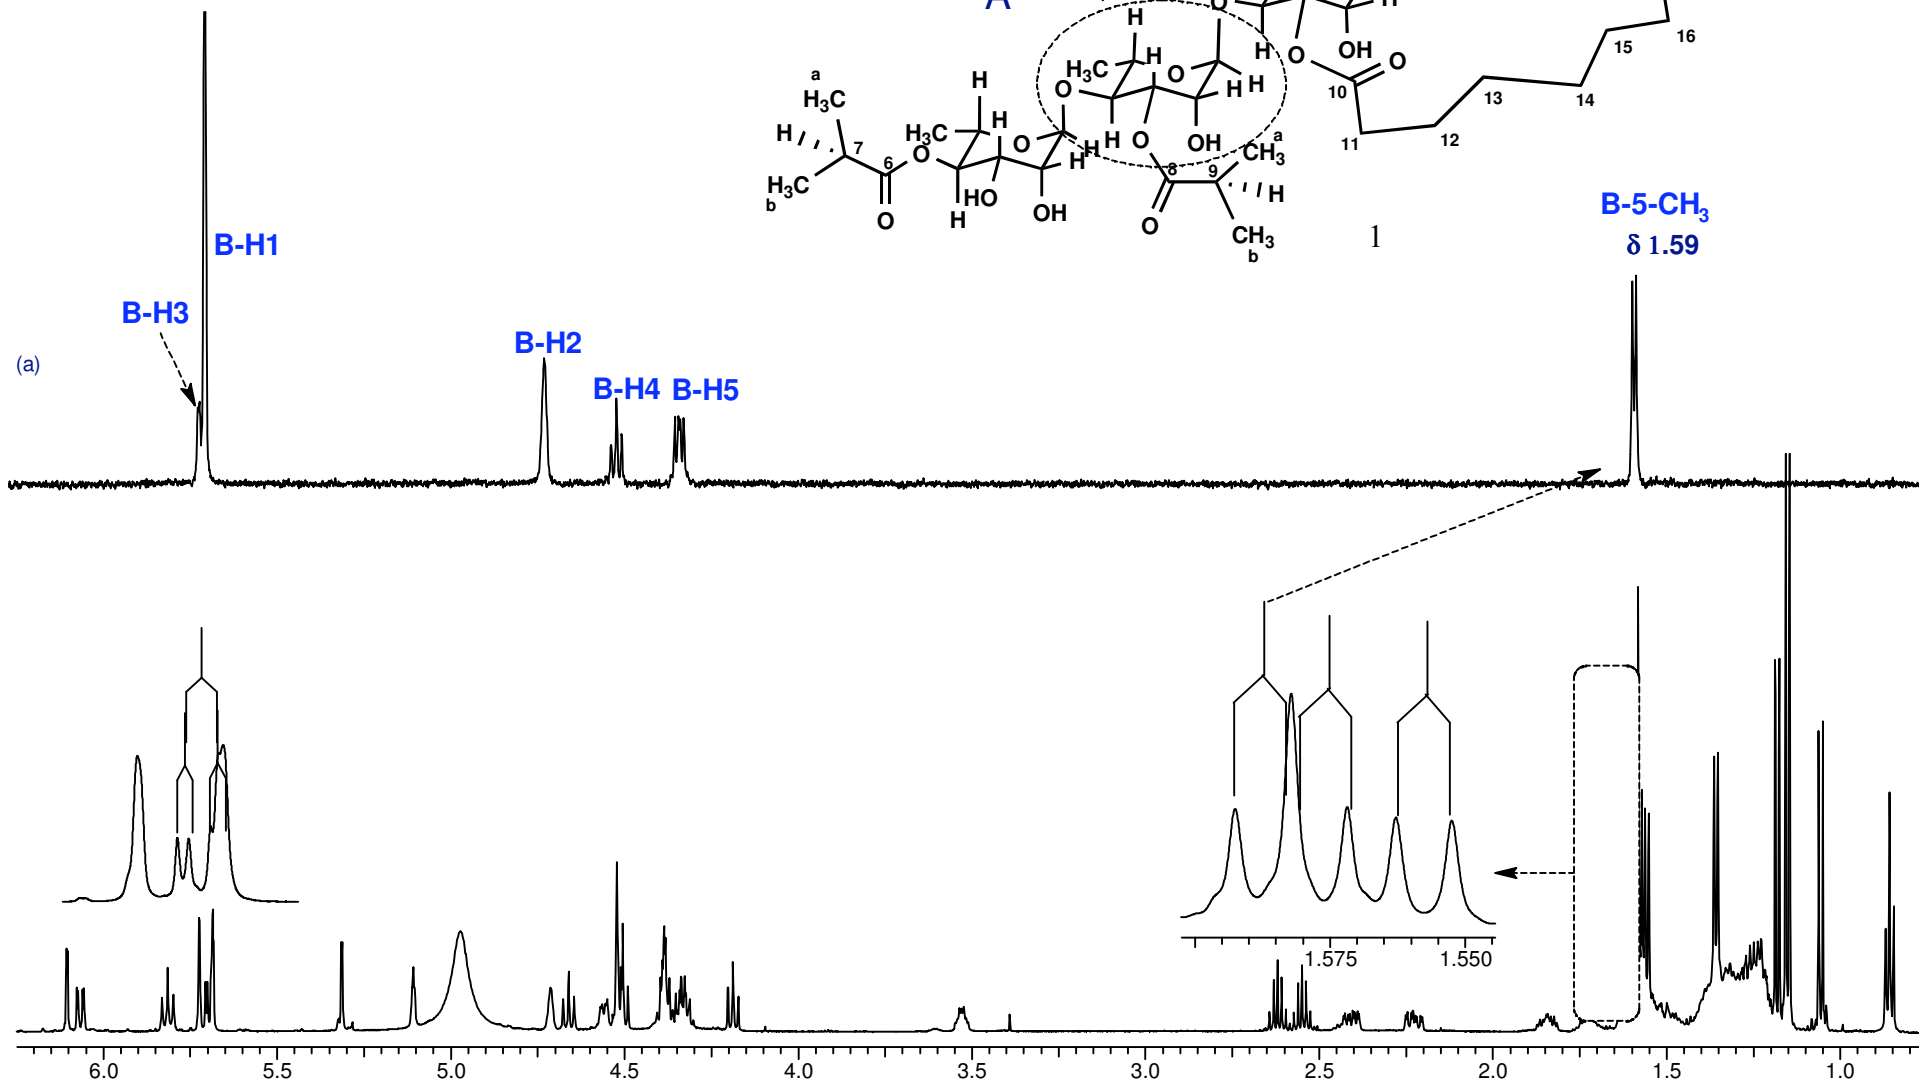

# Spin system identification for the sugar moiety C

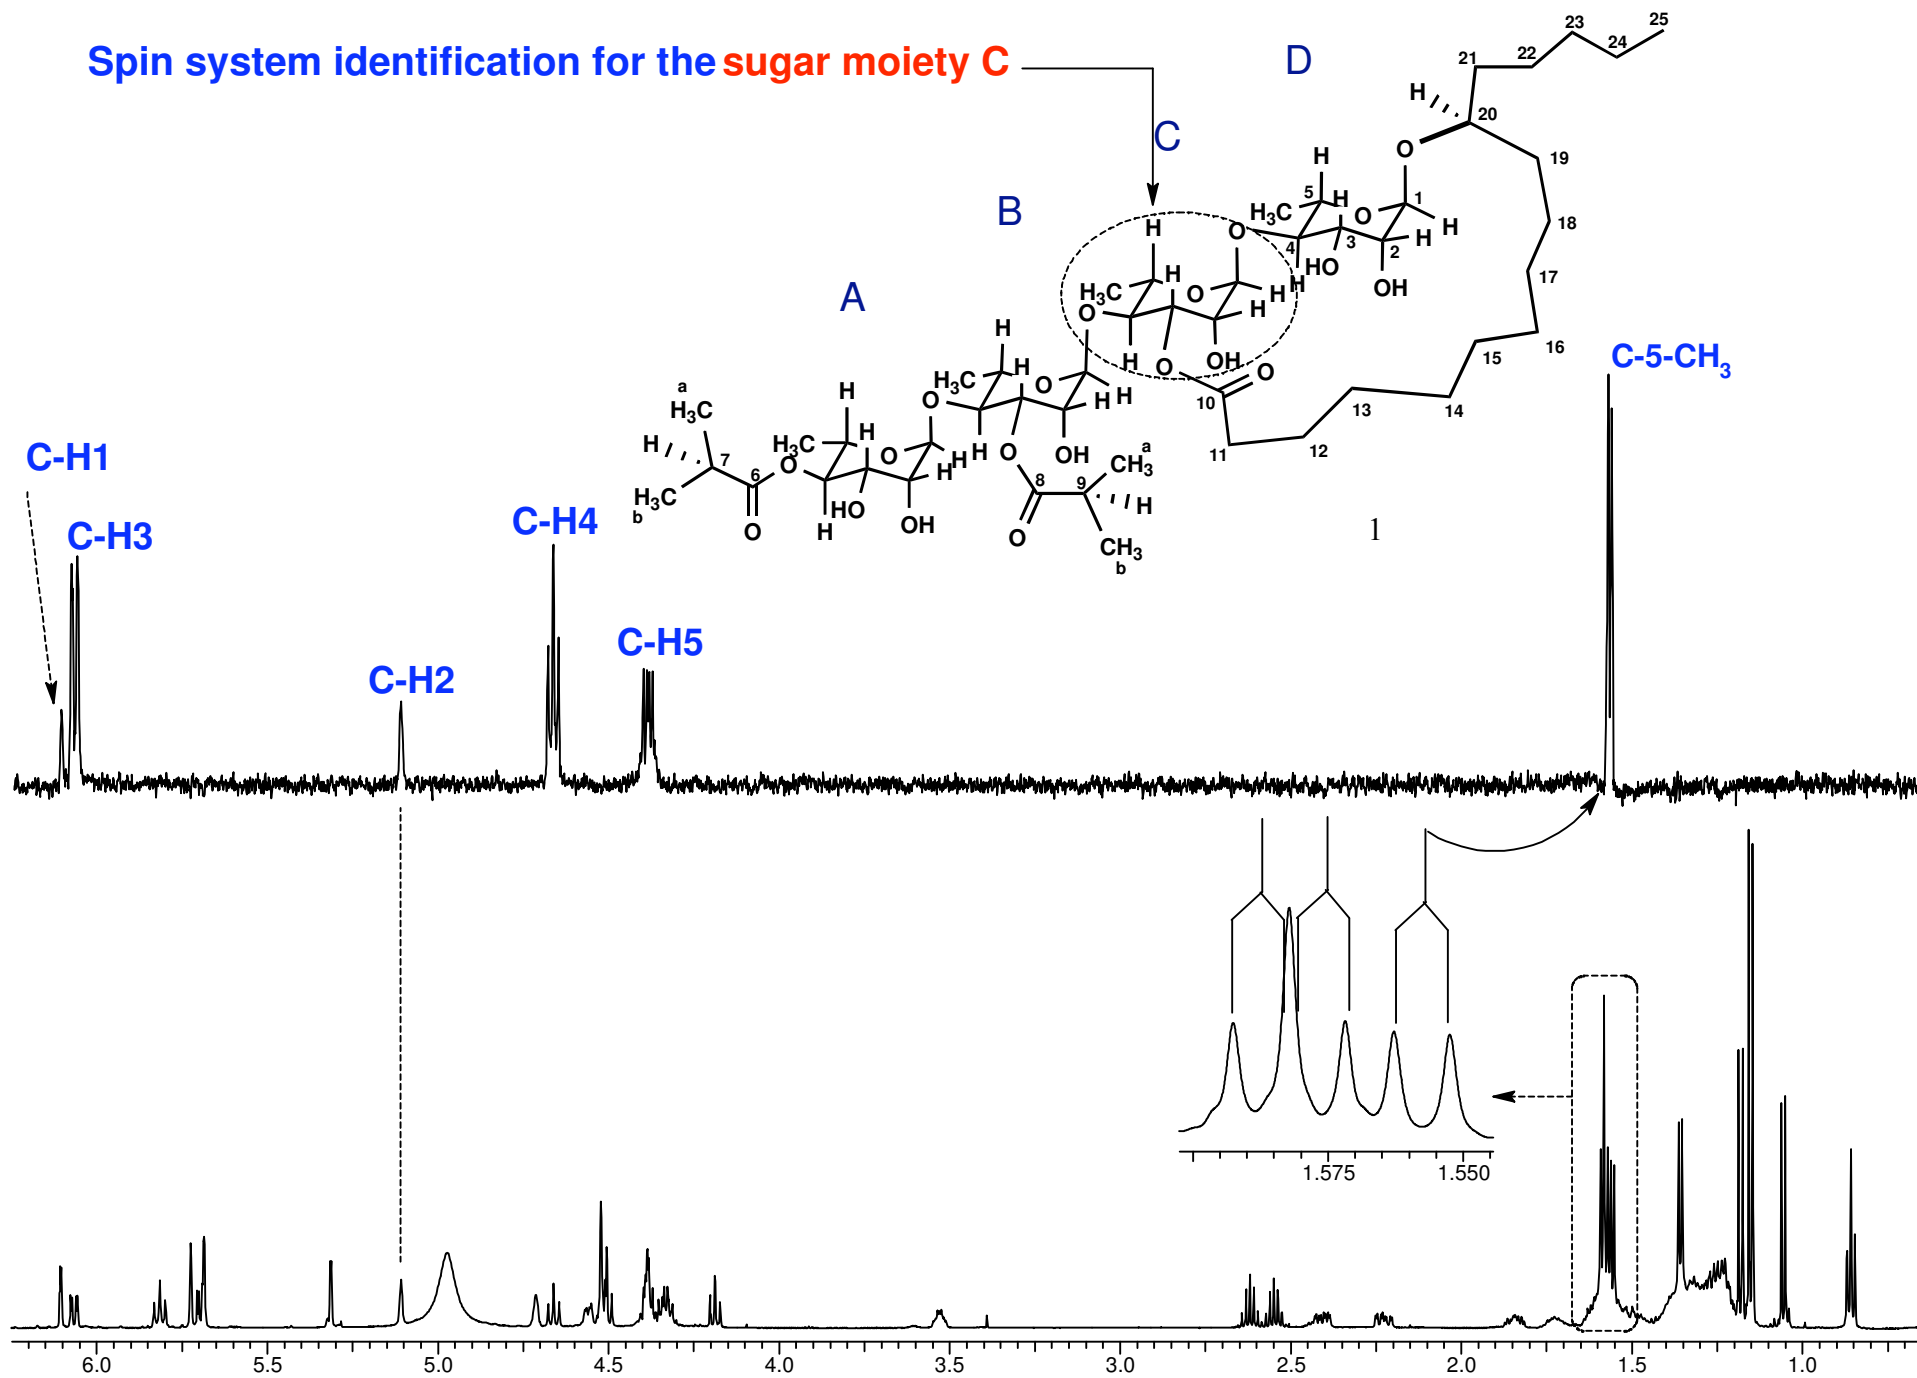

# Differentiation and Spin system identification for the sugar moiety D

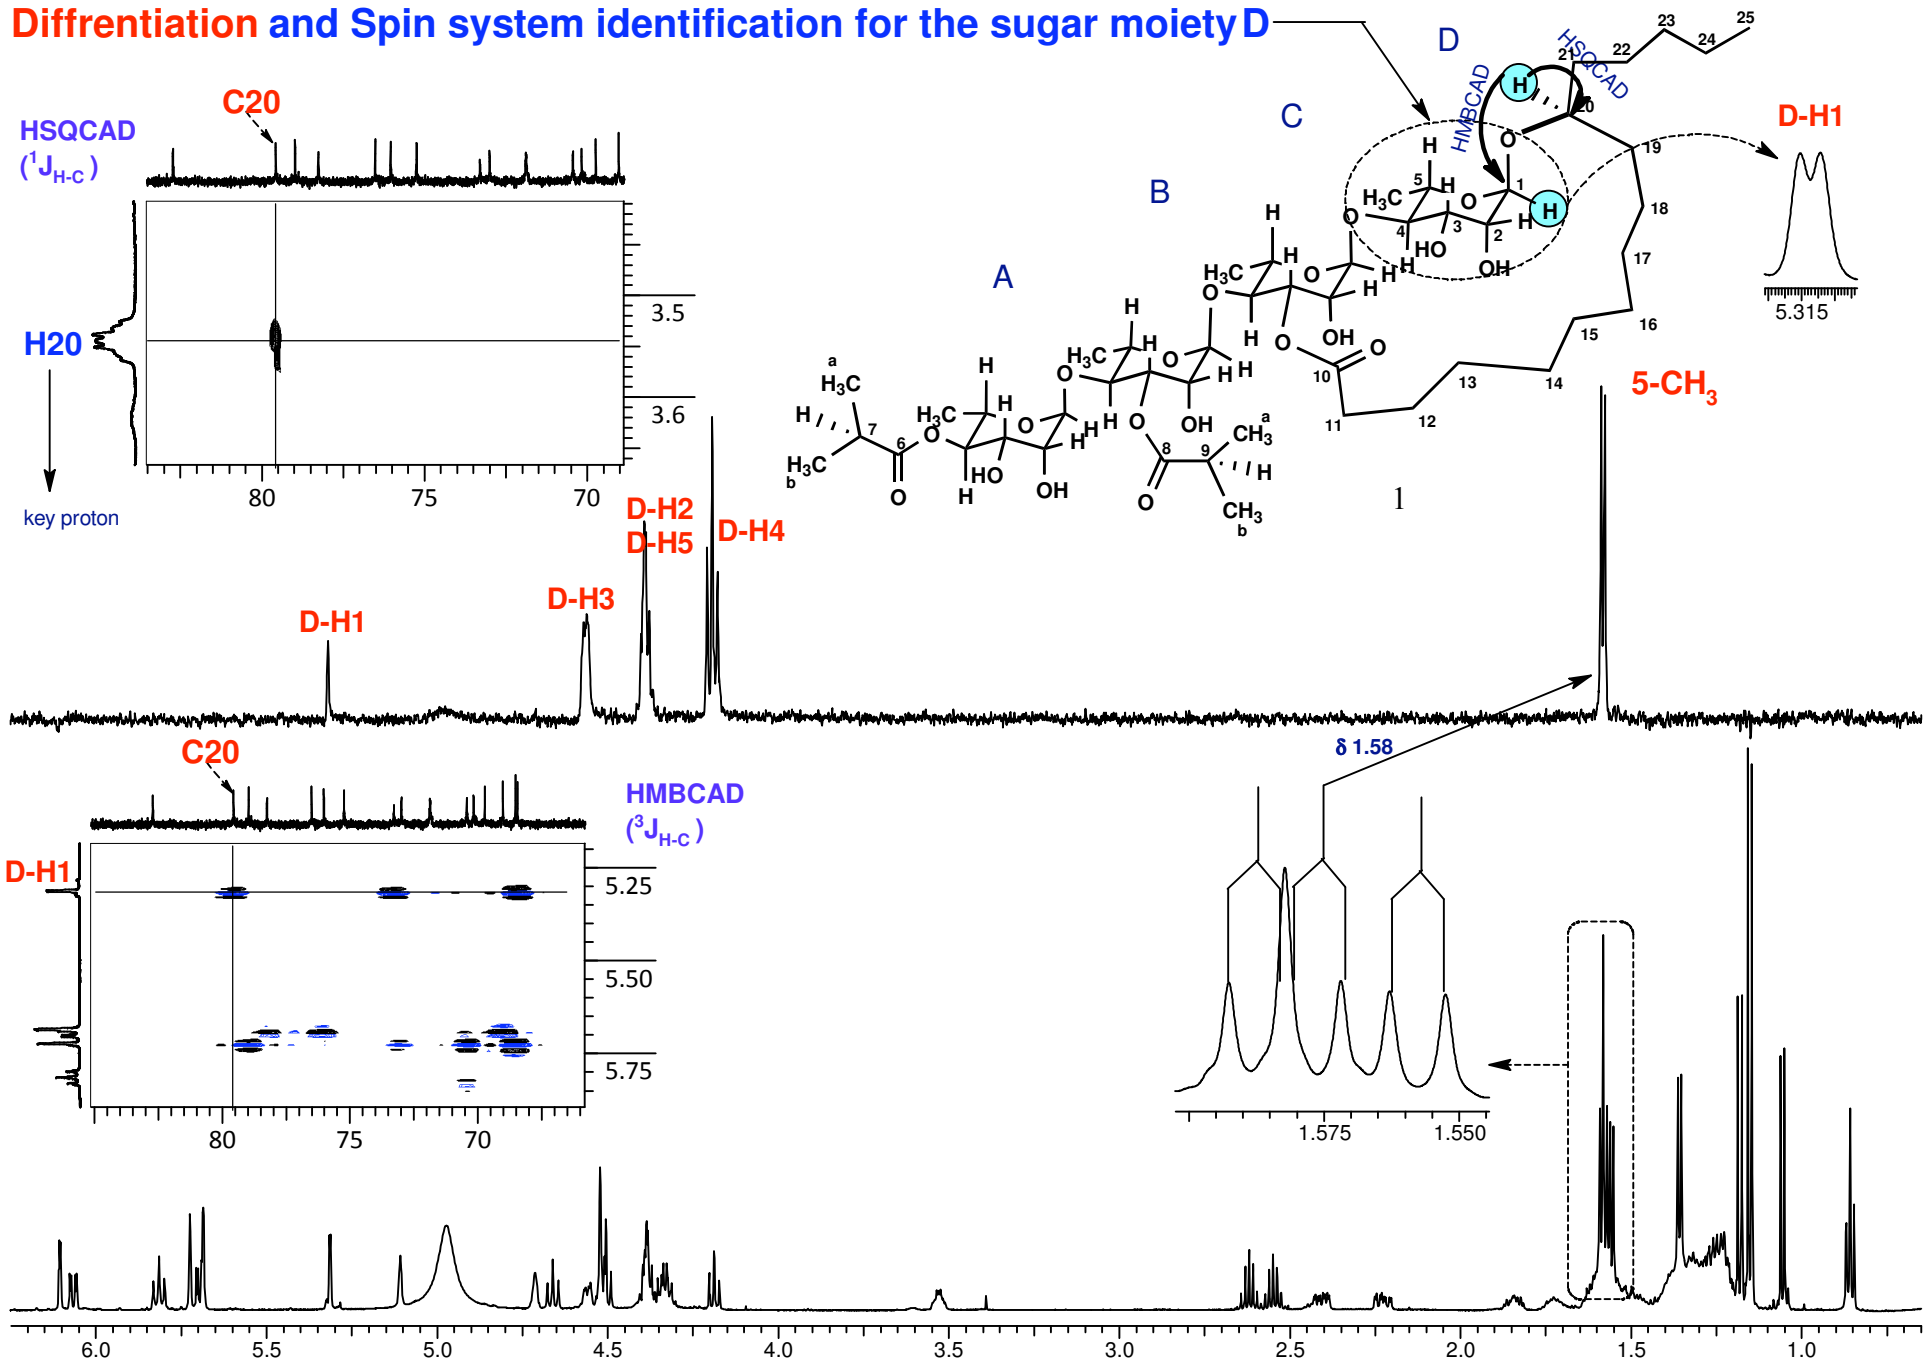

# Spn system identification for the isopropyl groups (for synthetic 1)

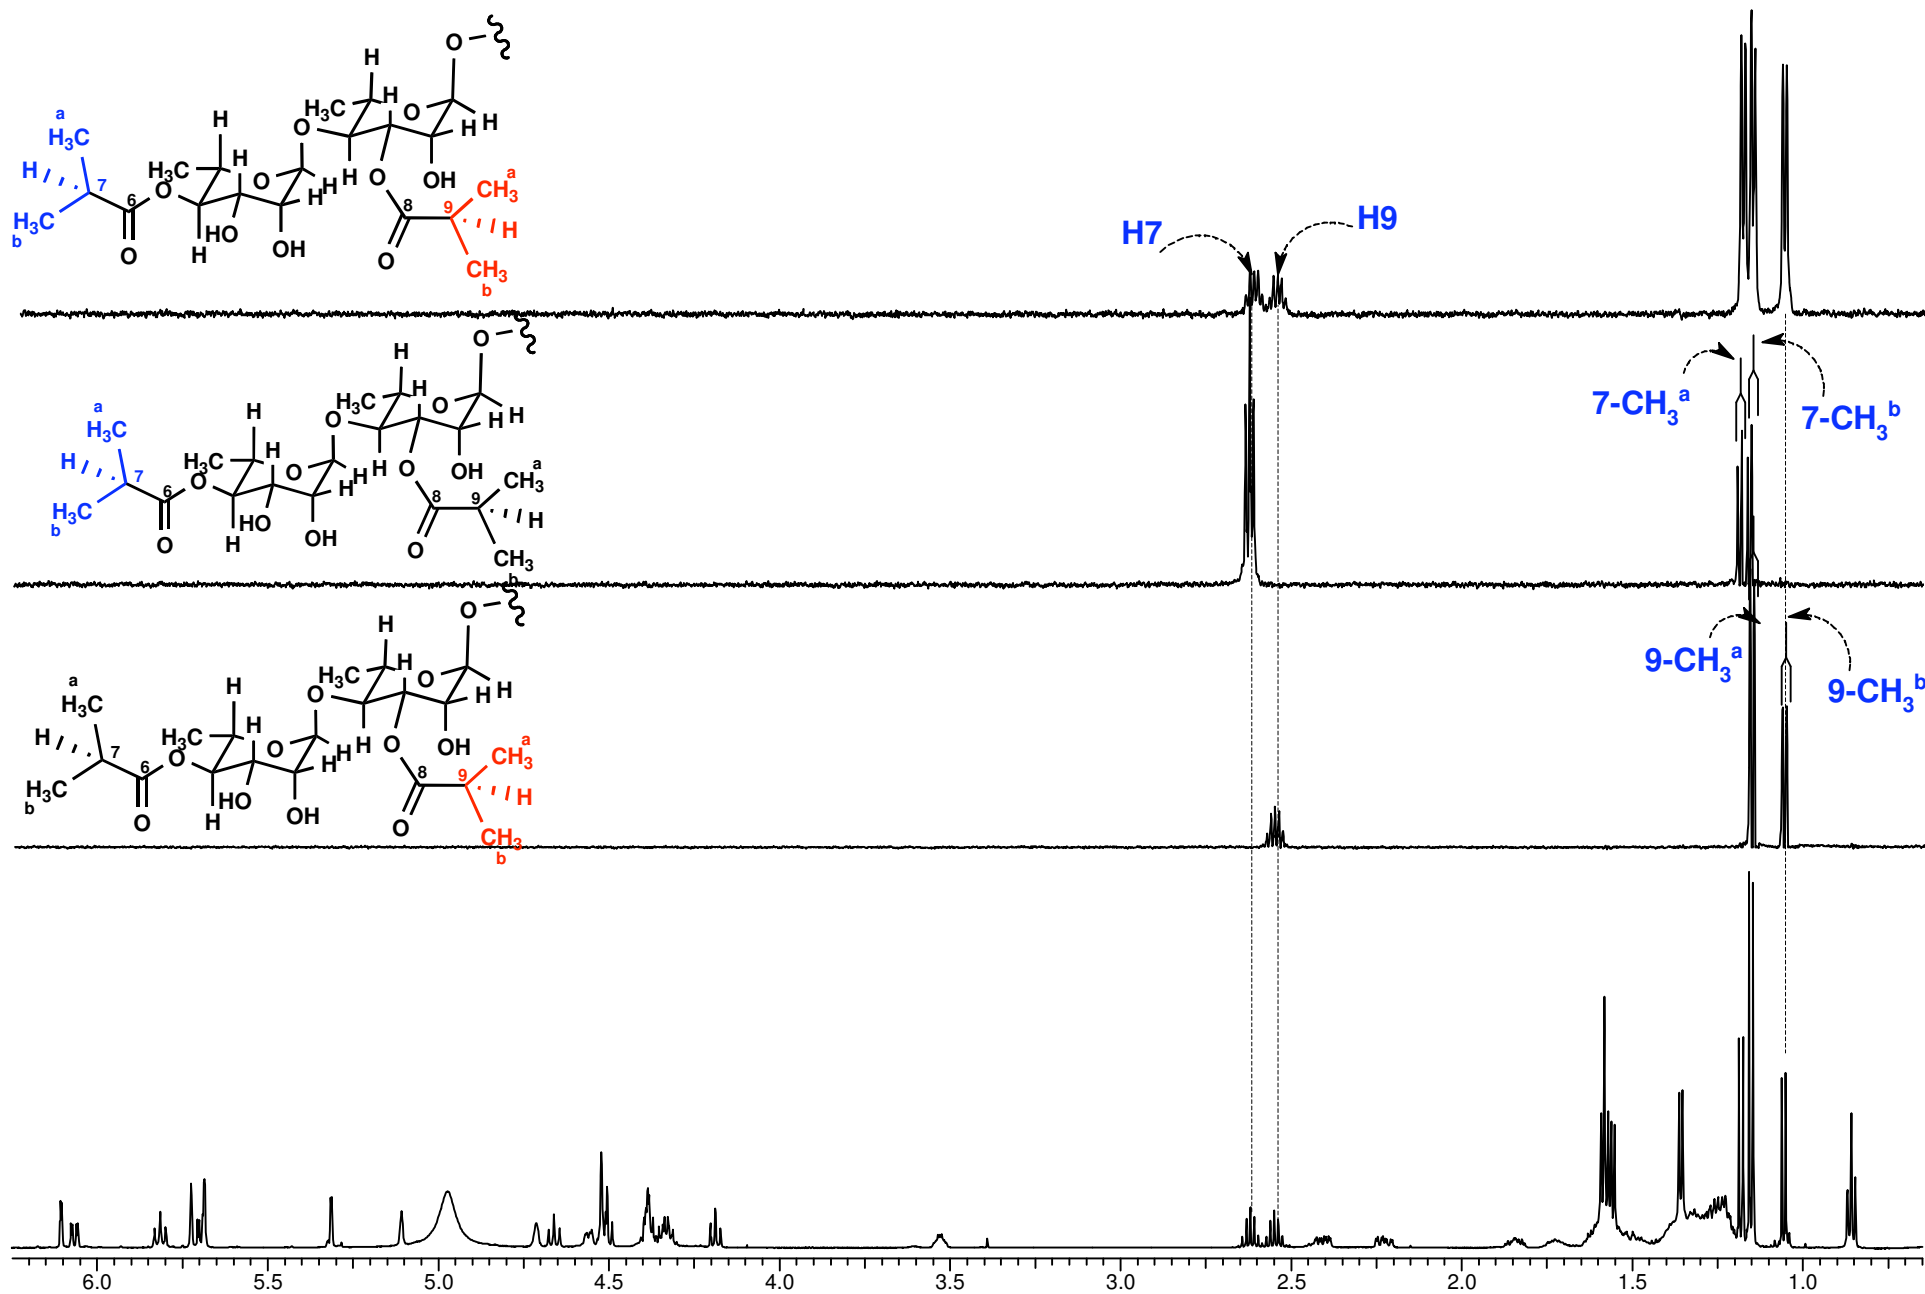

**ROESYAD** correlations (through space) confirm the linkage position between sugar moieties (A-D)

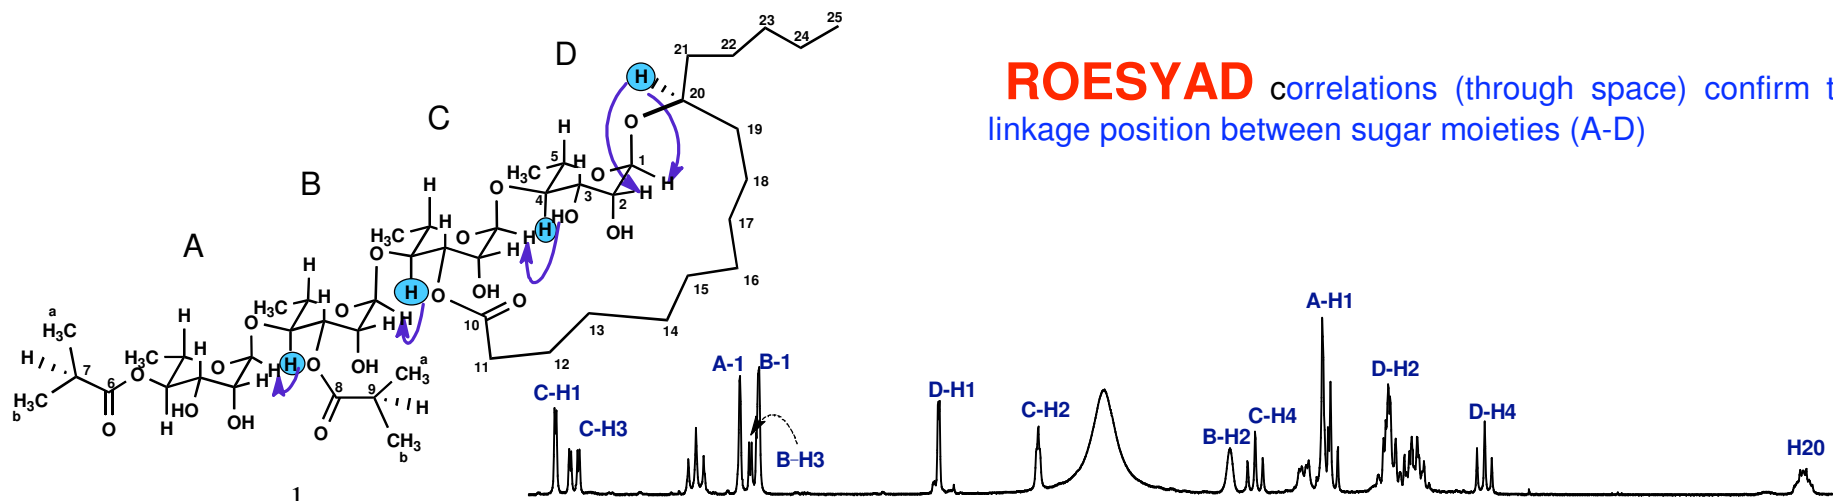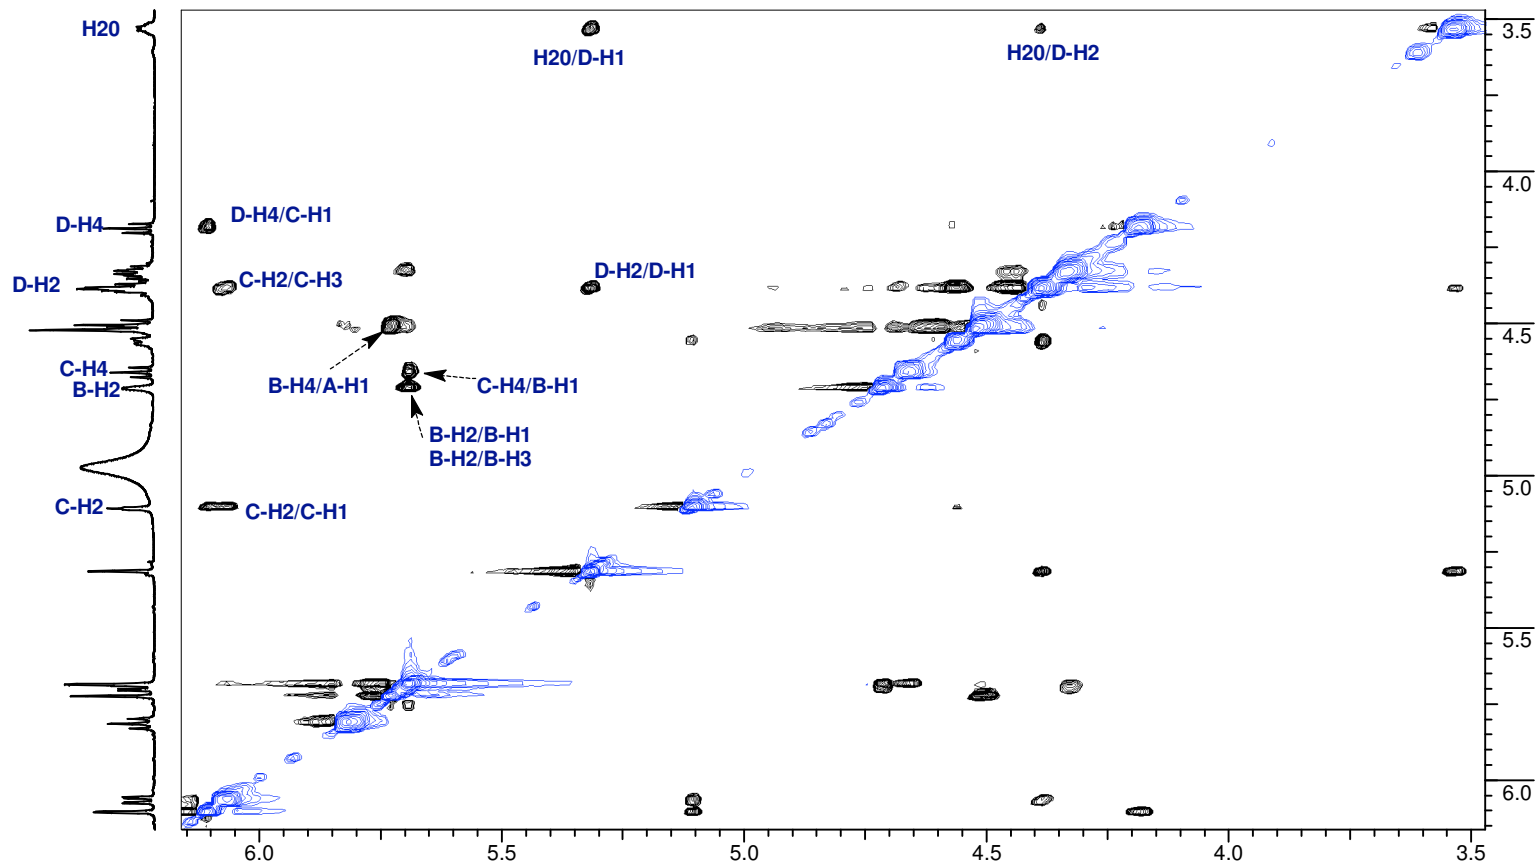

Three bond ( $^3J_{\text{HC}}$ ) HMBCAD correlations confirm the linkage position of the side chain and also the substituents  $(\text{CH}_3)_2\text{CH}-\text{C}(\text{O})$

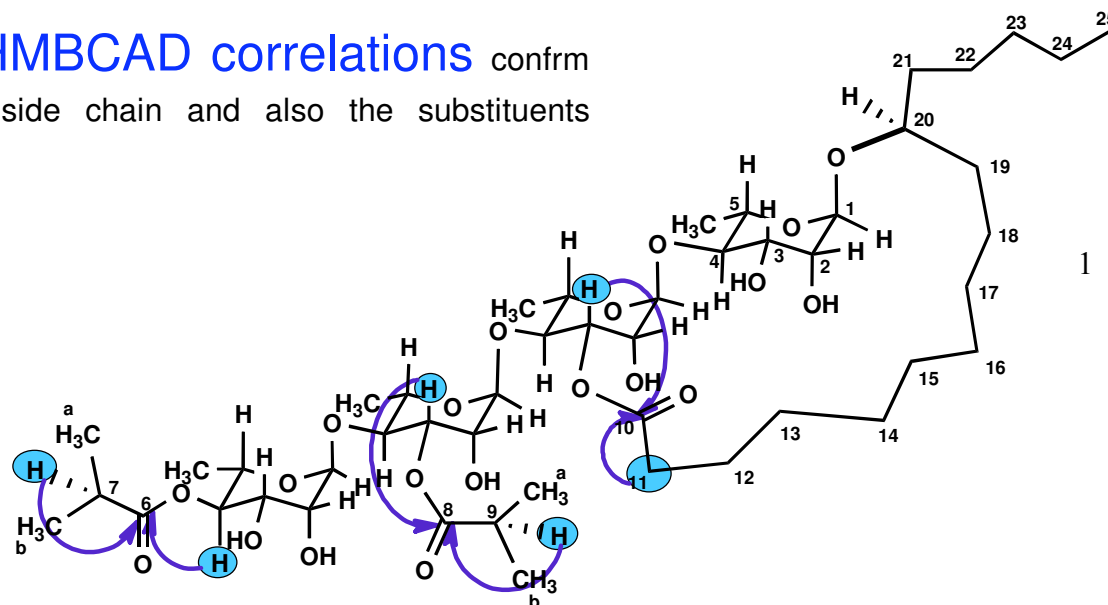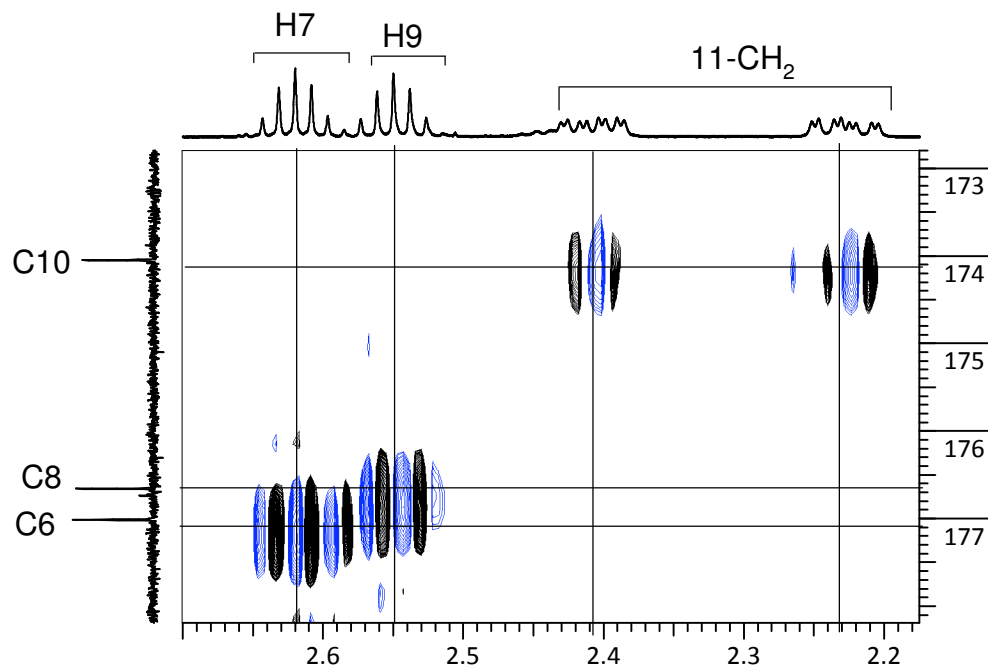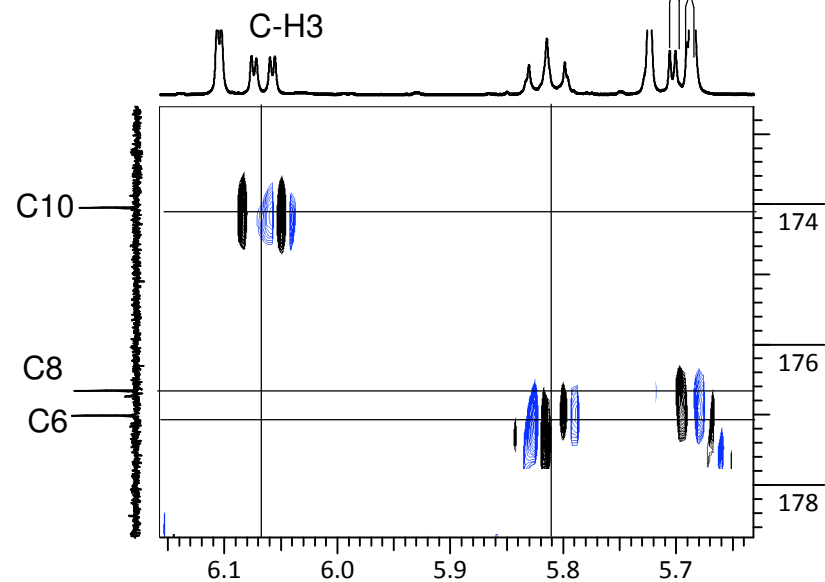

# HETCOR

One-bond ( $^1J_{CH}$ )

correlations

(for synthetic 1)

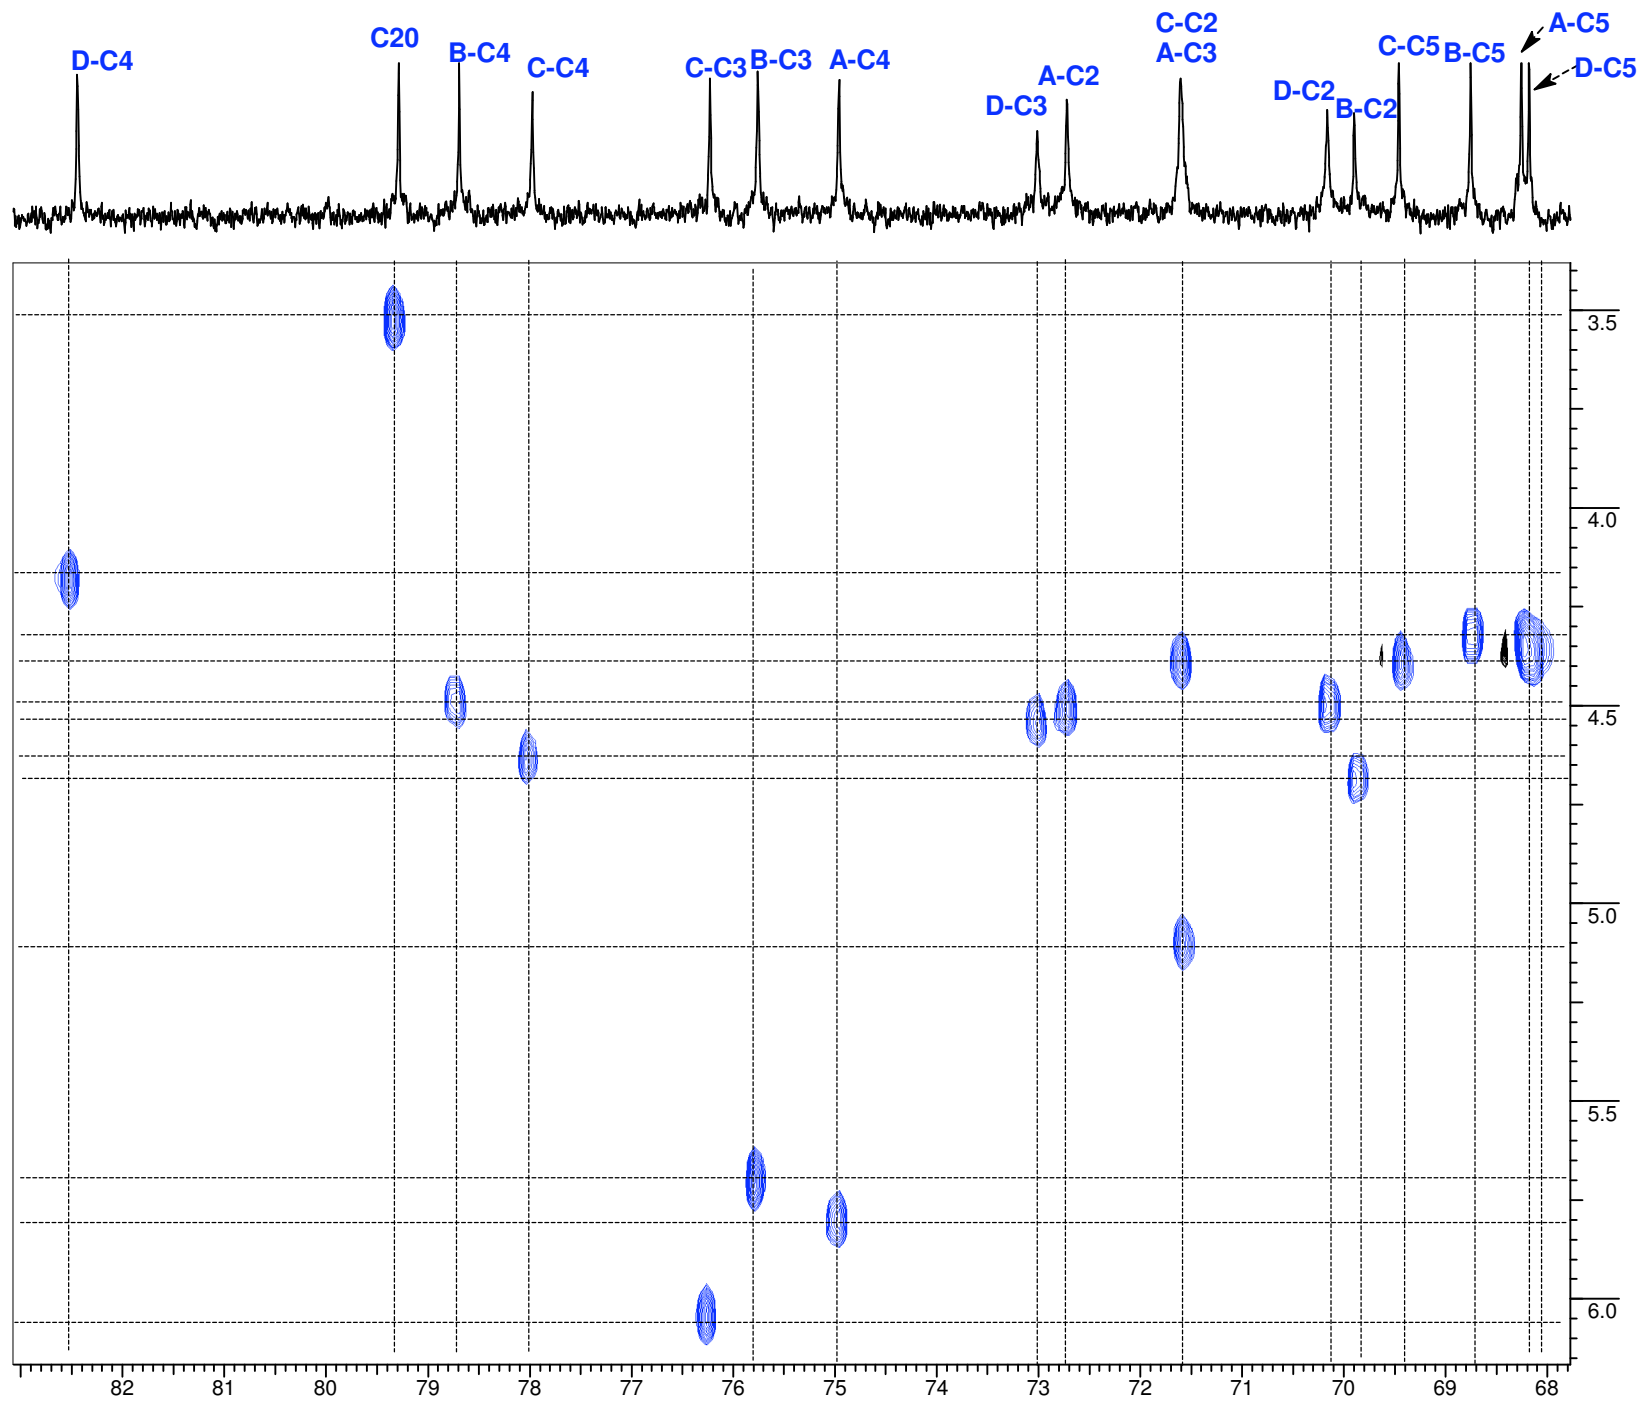



# HSQCAD

One-bond ( $^1J_{CH}$ ) correlations

(for synthetic 1)

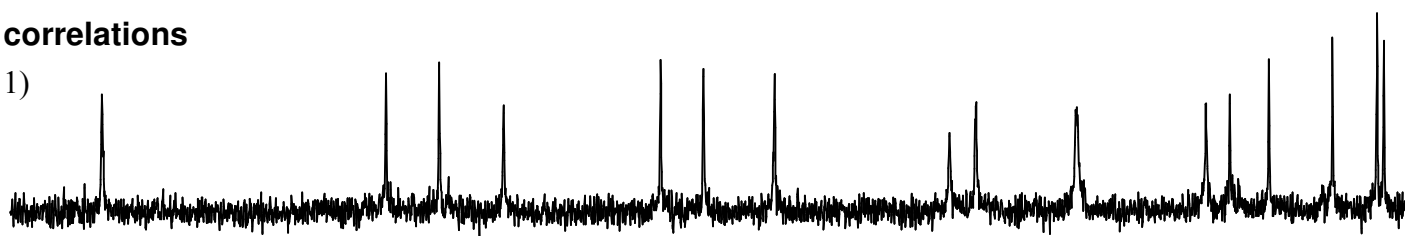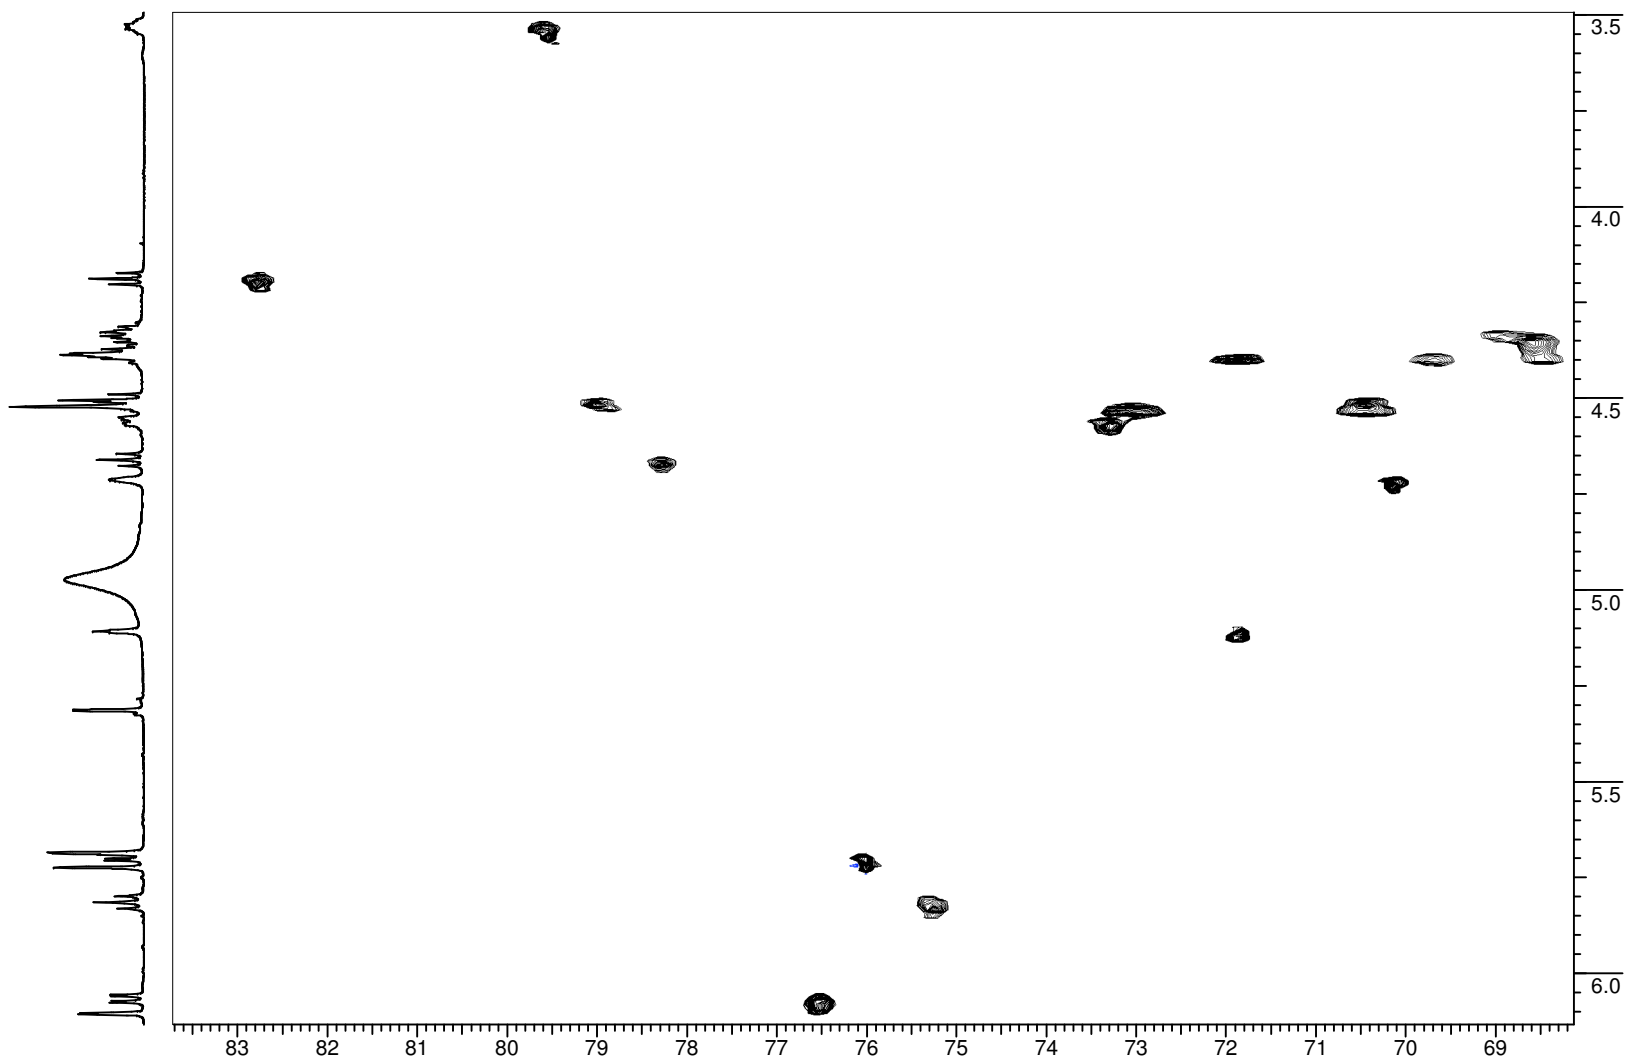

**gCOSY**  
(for synthetic 1)

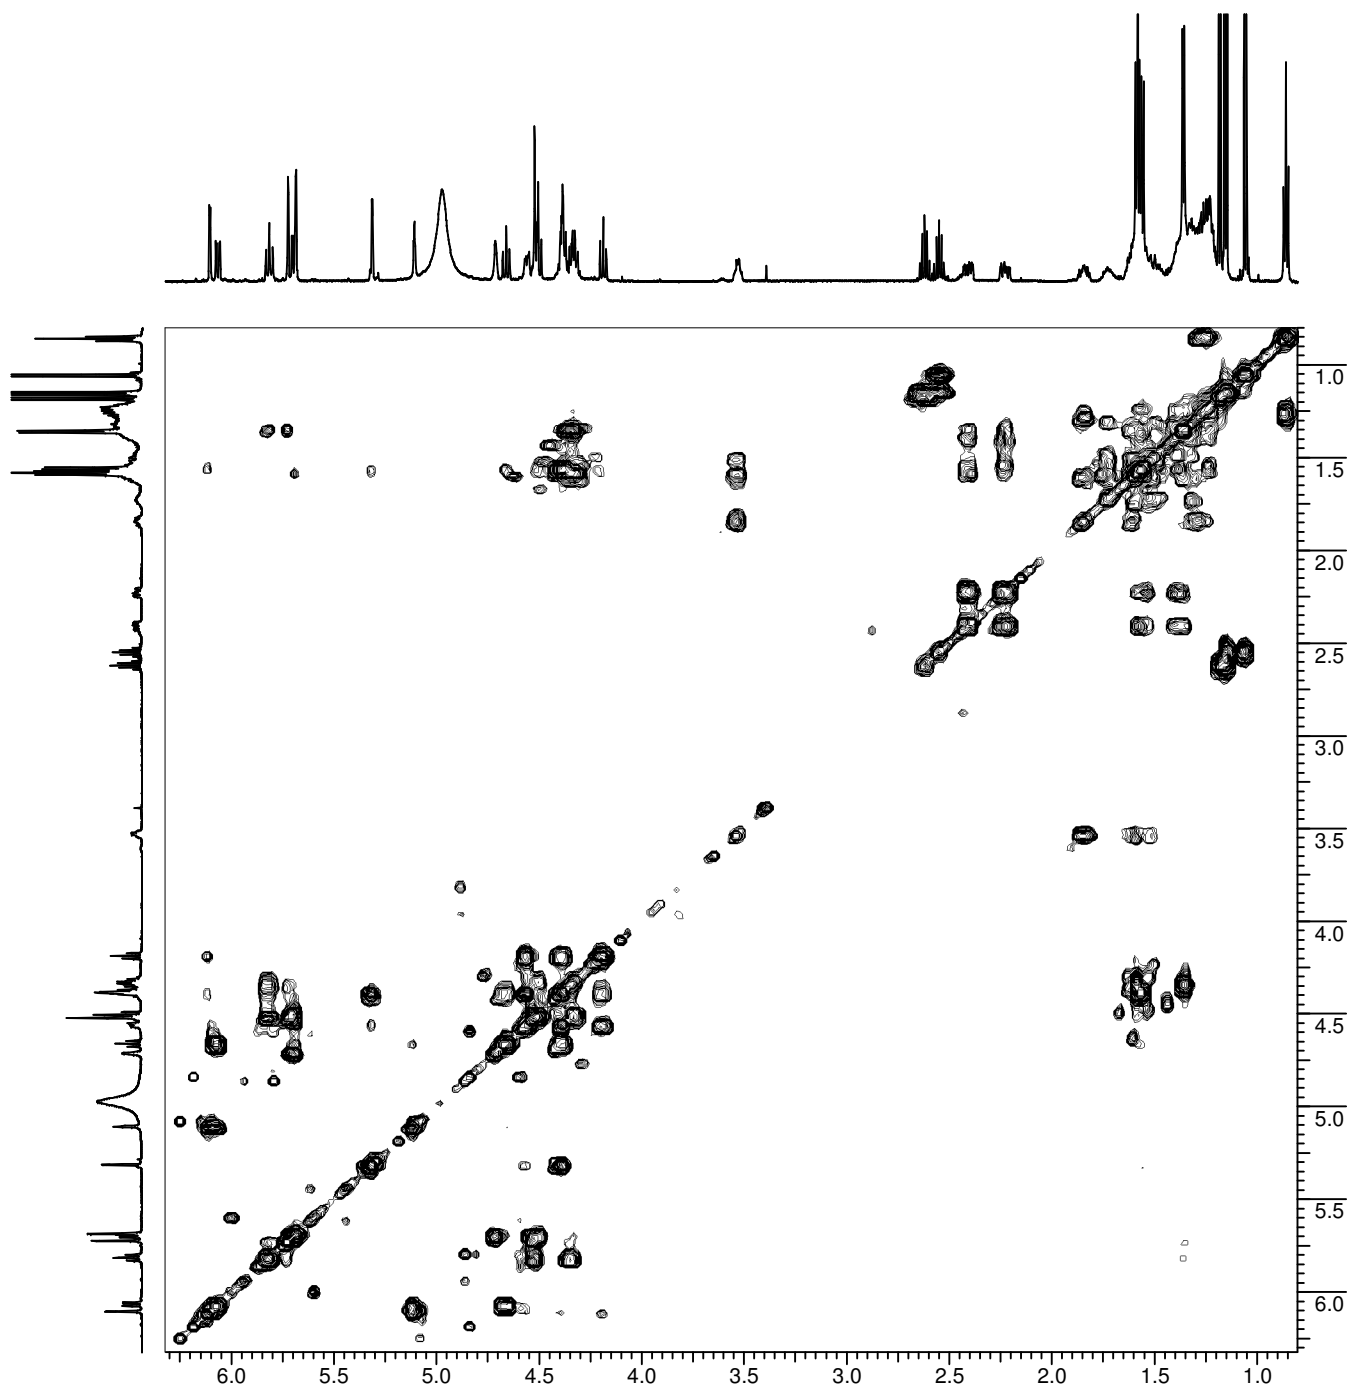

Expanded portion of the gCOSY spectrum (for synthetic 1)

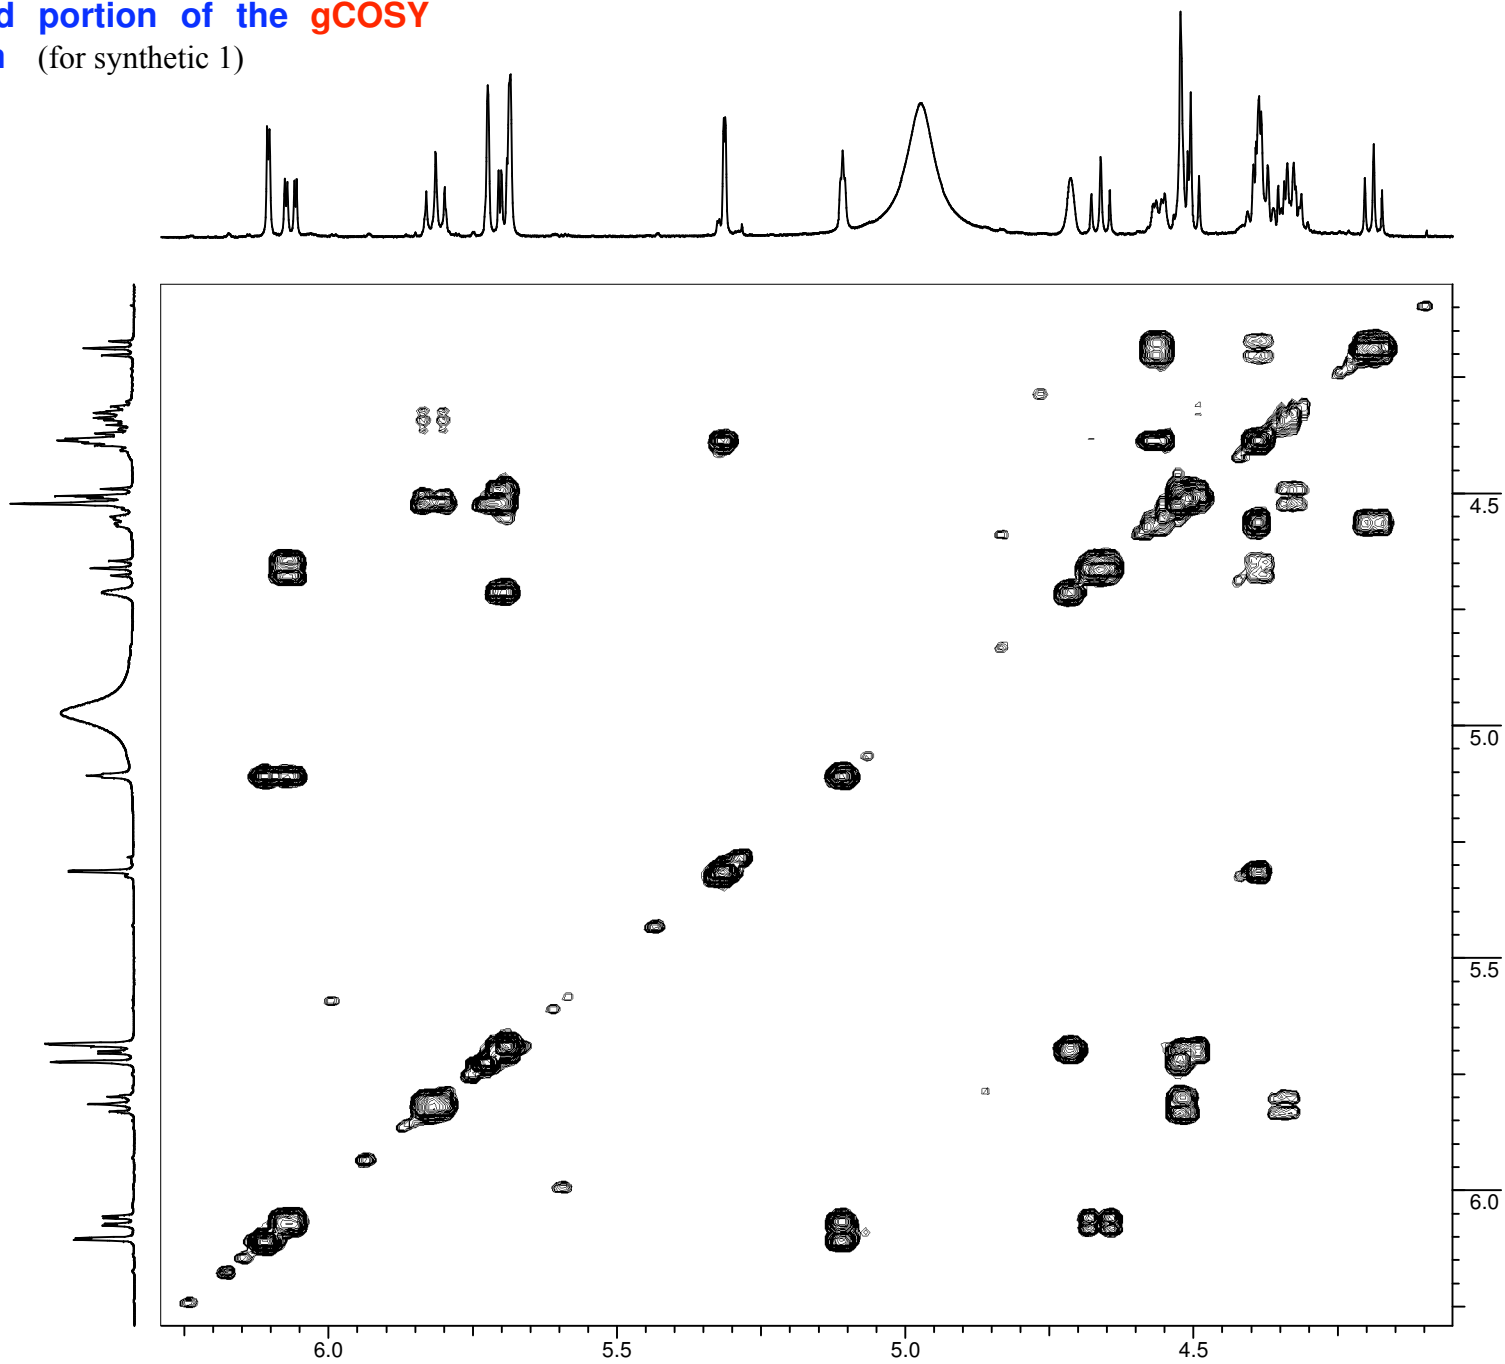

# ROESYAD

(for synthetic 1)

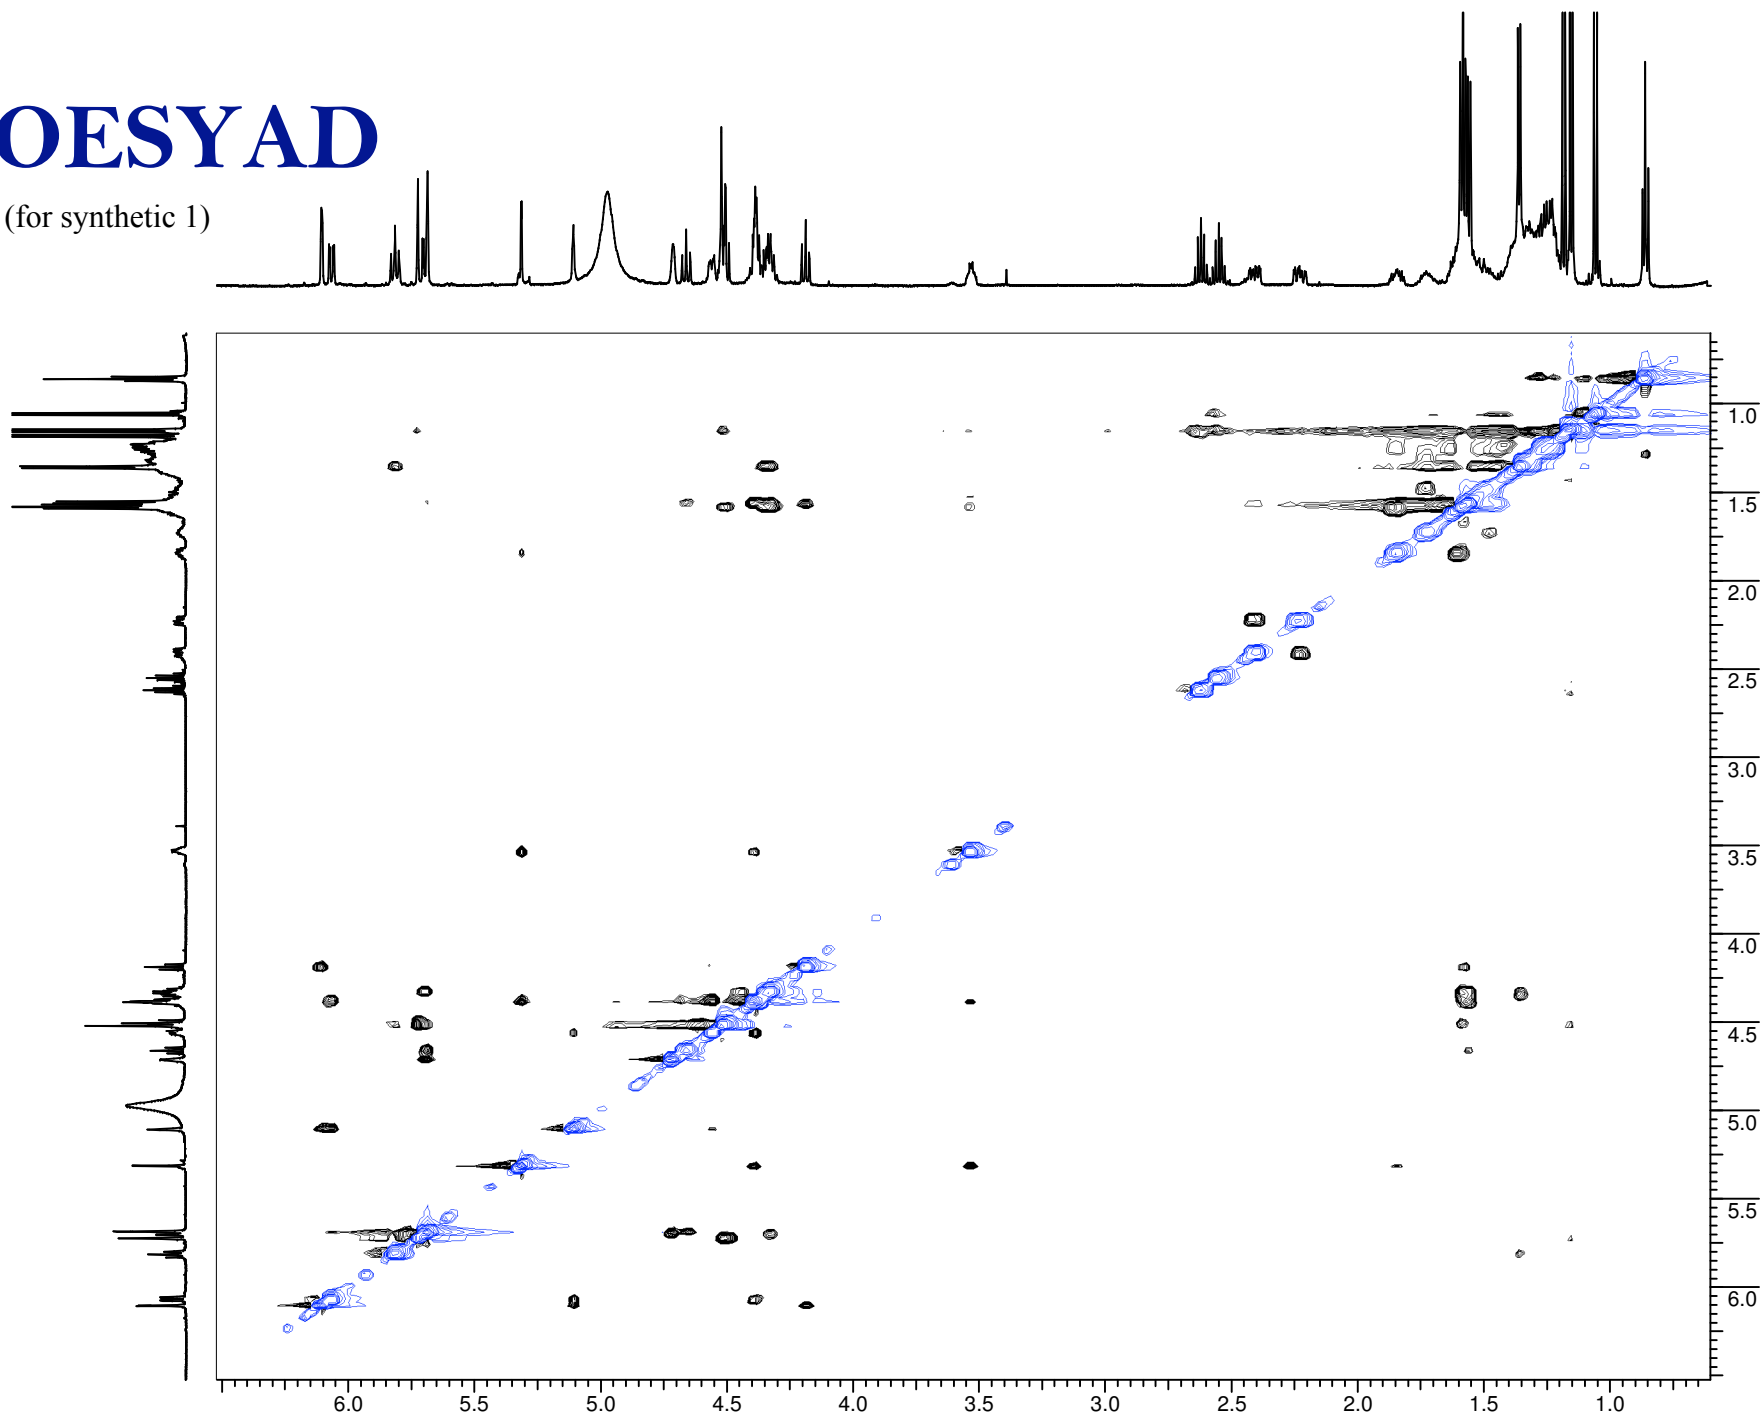

$^{13}\text{C}$  NMR spectrum in pyridine- $d_5$

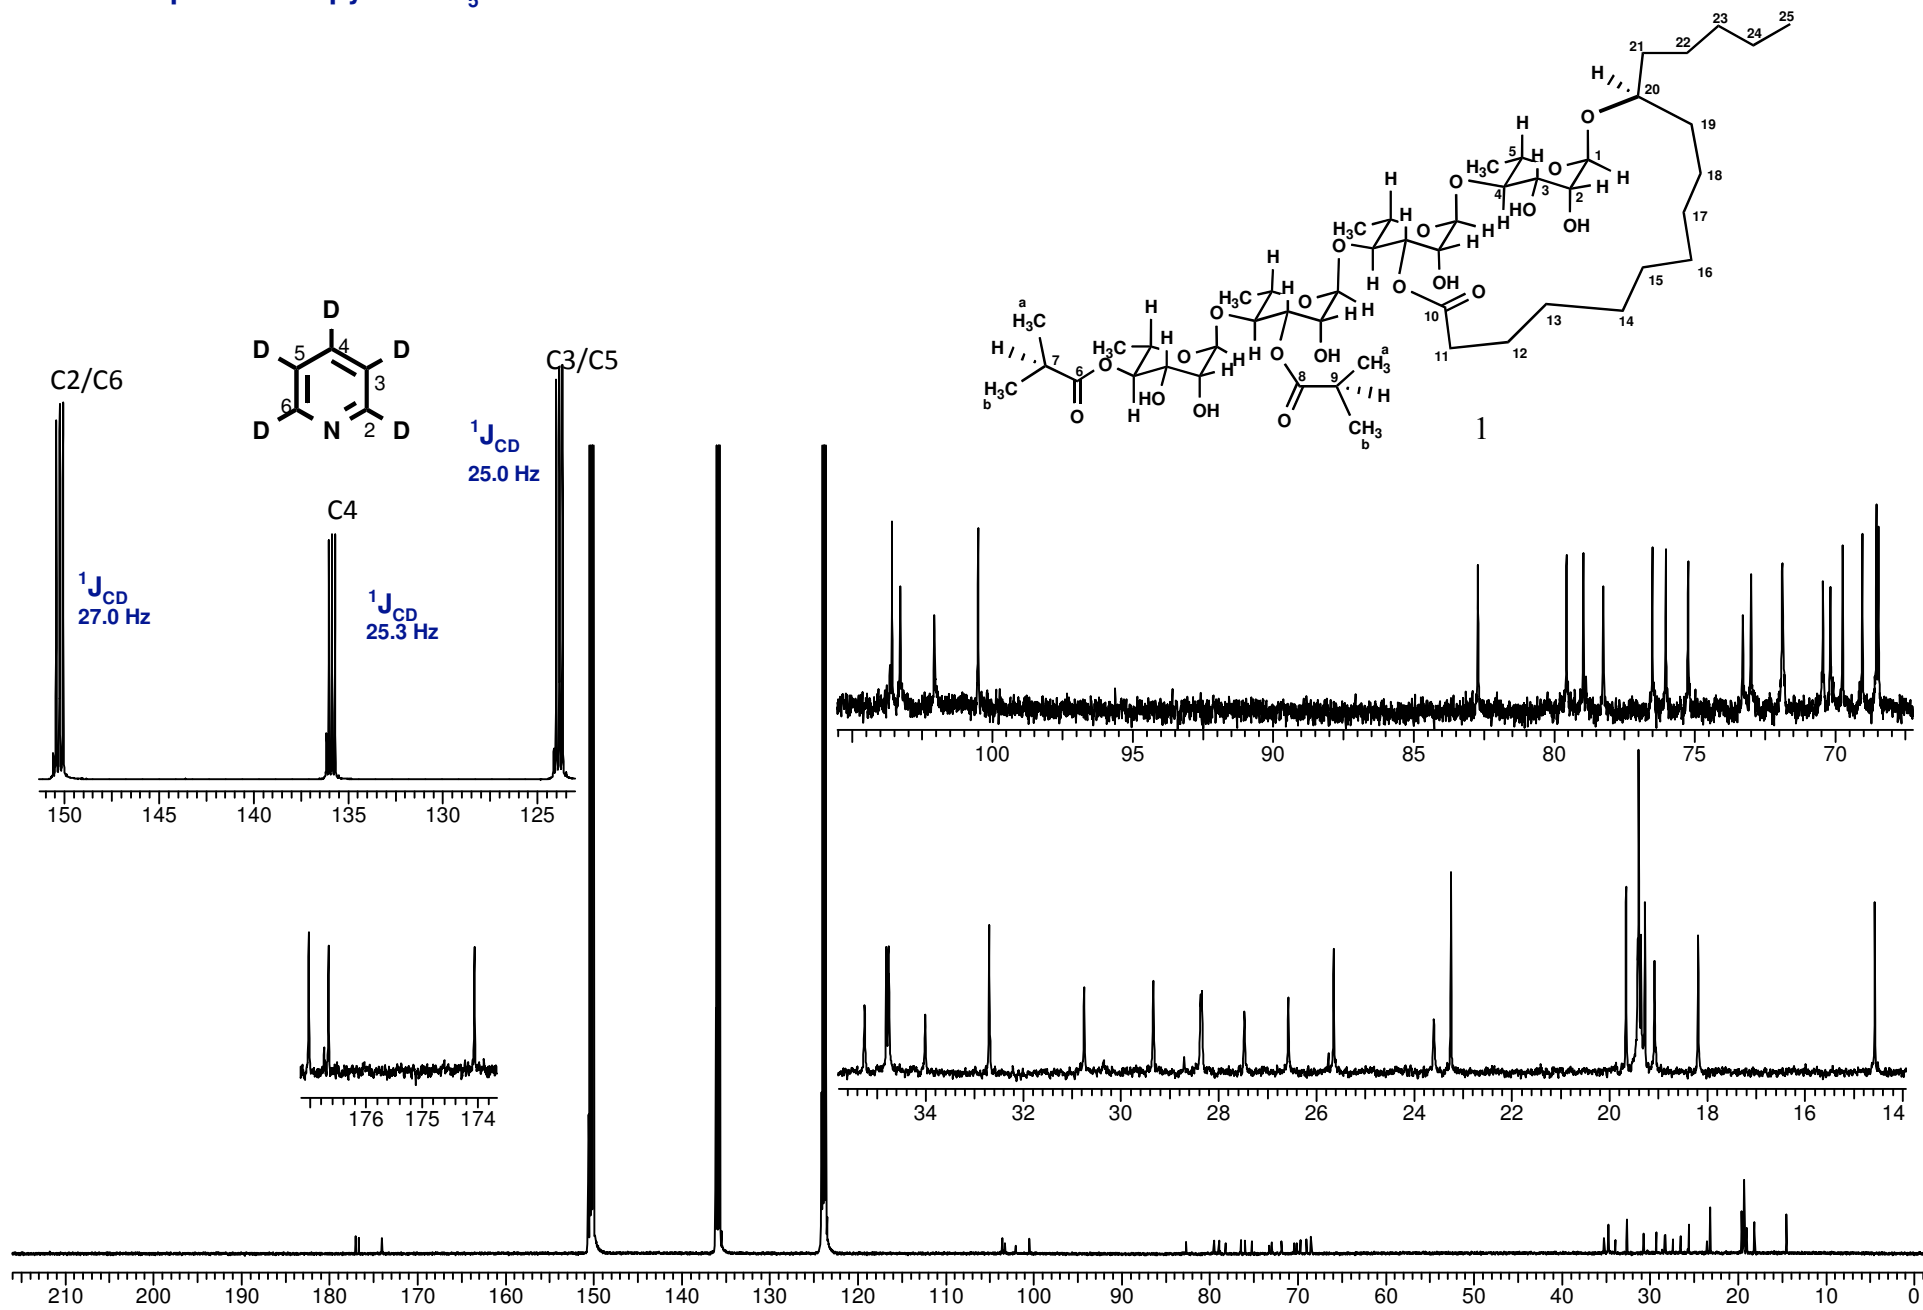

Comparison of  $^1\text{H}$  NMR in different solvents

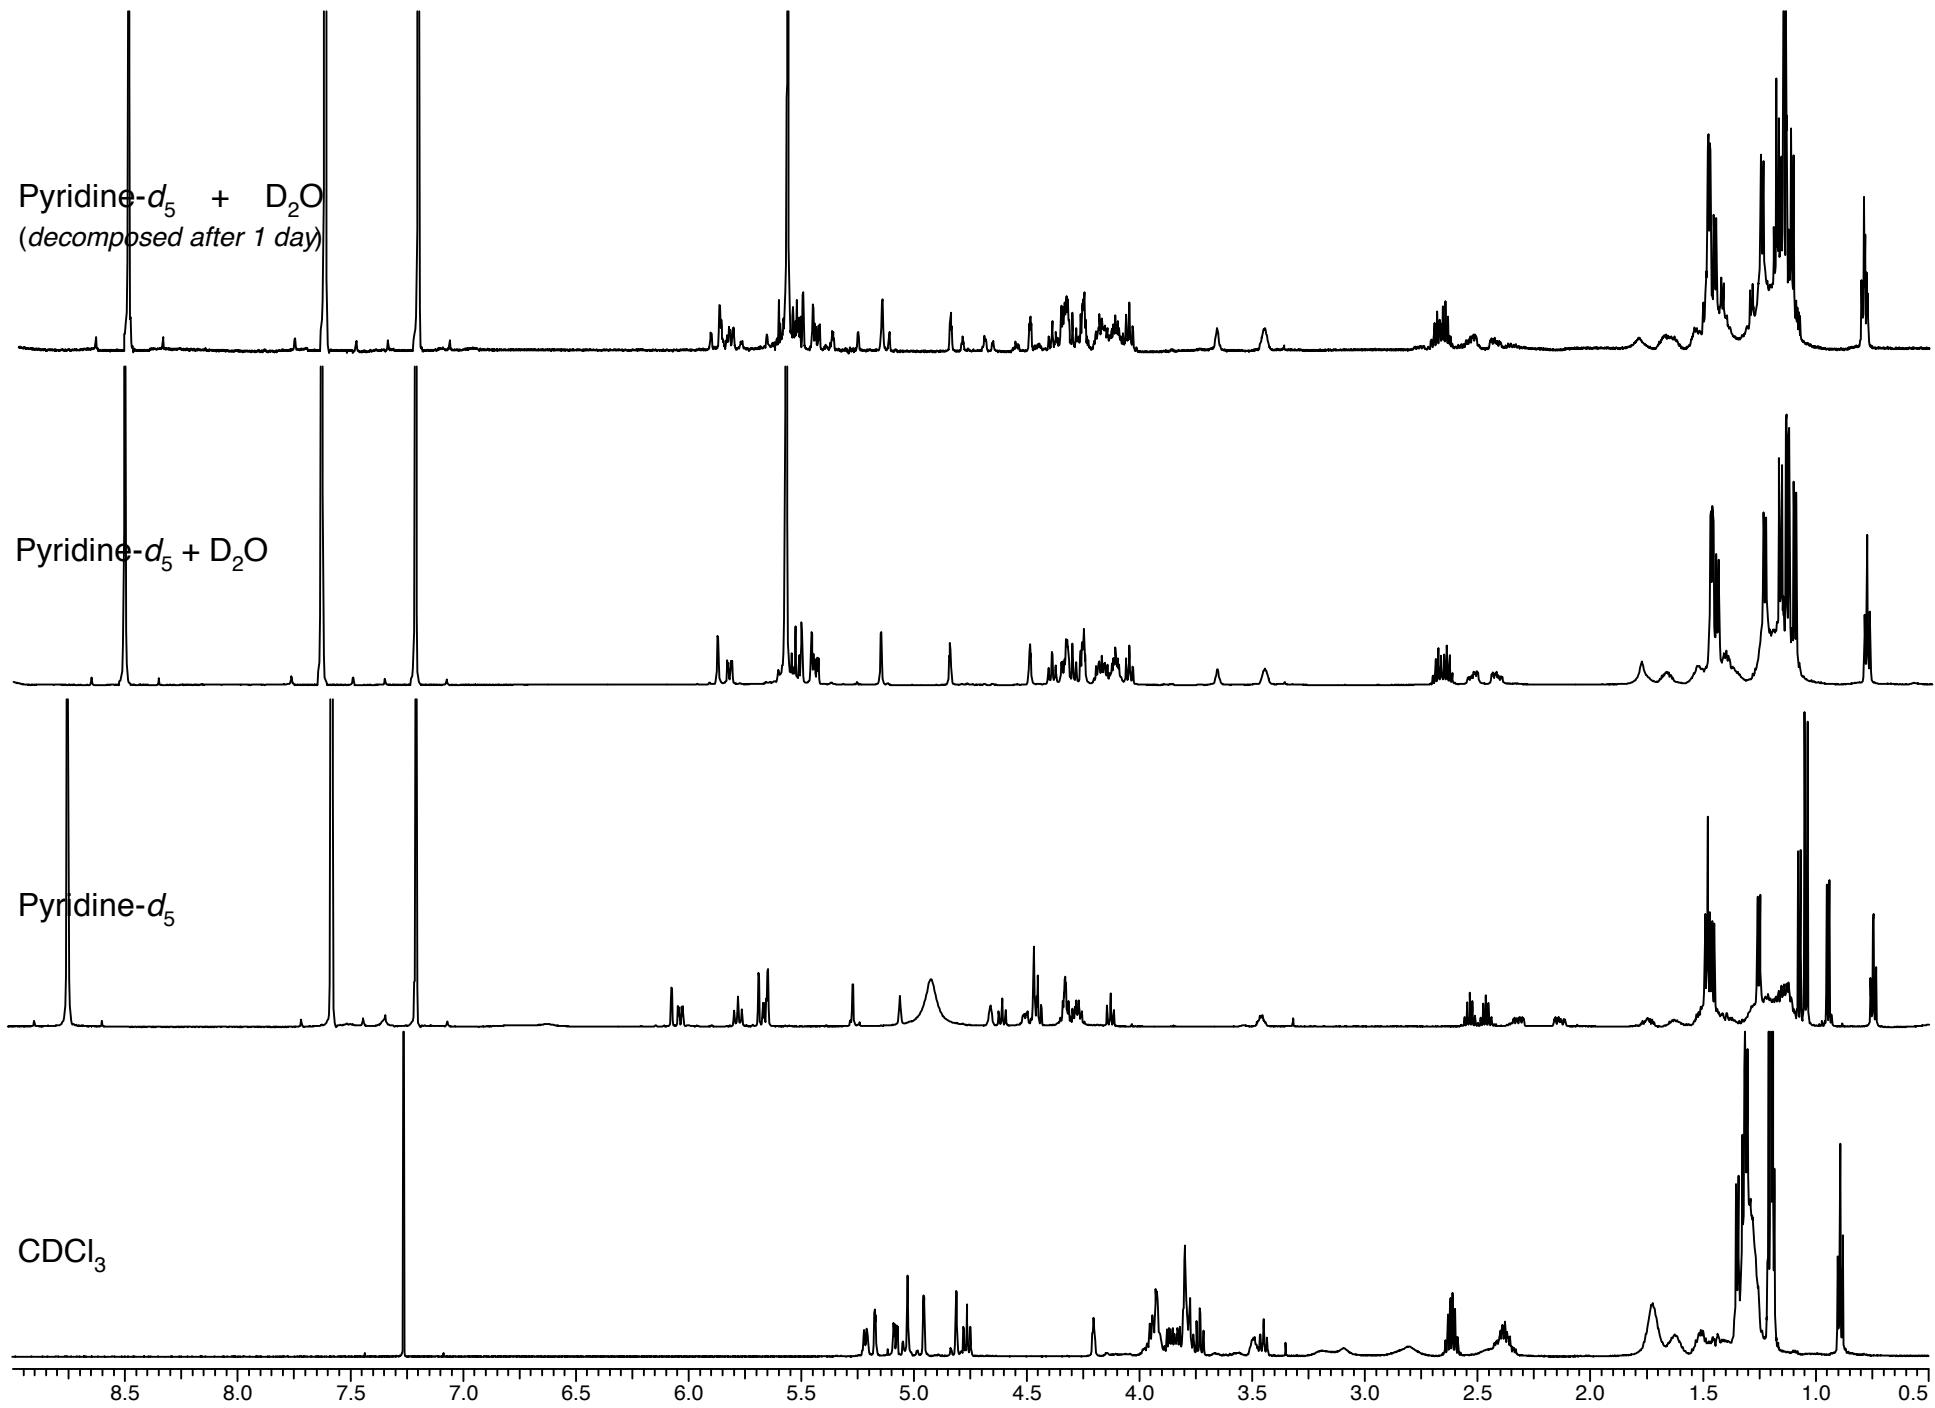

Supplement: NIHMS551538-supplement-1_si_001.pdf [file NIHMS551538-supplement-1_si_001.pdf]
